# Supplementary material for: Identification of Candidate Susceptibility Genes to Puccinia graminis f. sp. tritici in Wheat
Source: Frontiers journal article supplement (doi:10.3389/fpls.2021.657796), 2021-04-21
Supplement: Data_Sheet_1.pdf [file Data_Sheet_1.pdf]

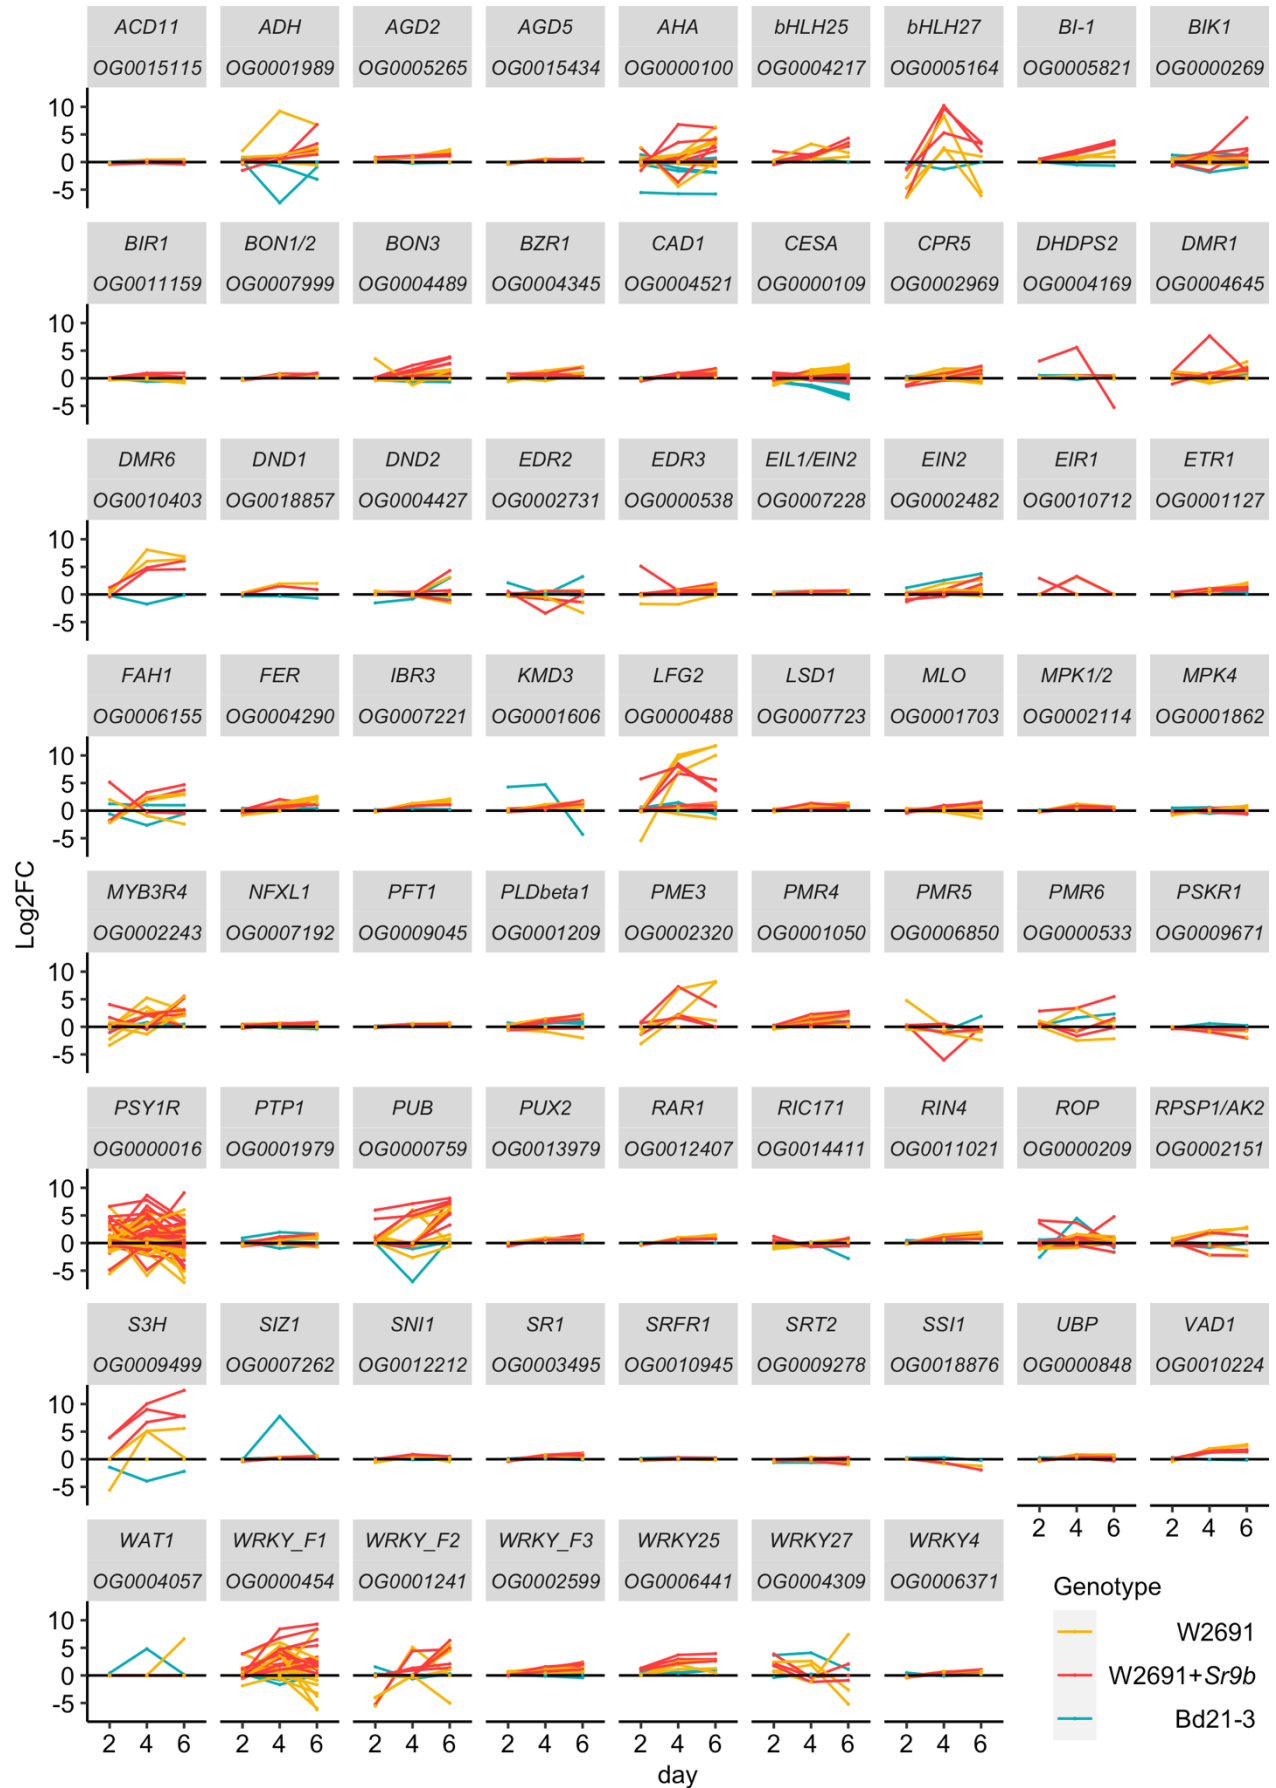

**Supplementary Figure 1.** Expression profile patterns of orthogroups containing candidate *S* genes in *T. aestivum* (W2691 and W2691+*Sr9b*) and *B. distachyon* (Bd21-3) genotypes throughout infection with *P. graminis* f. sp. *tritici*. Log2 fold change values (y-axis) for all gene orthologs are presented per sampling time point (x-axis). Name of *S* gene and orthogroup identifier are shown in each graph.

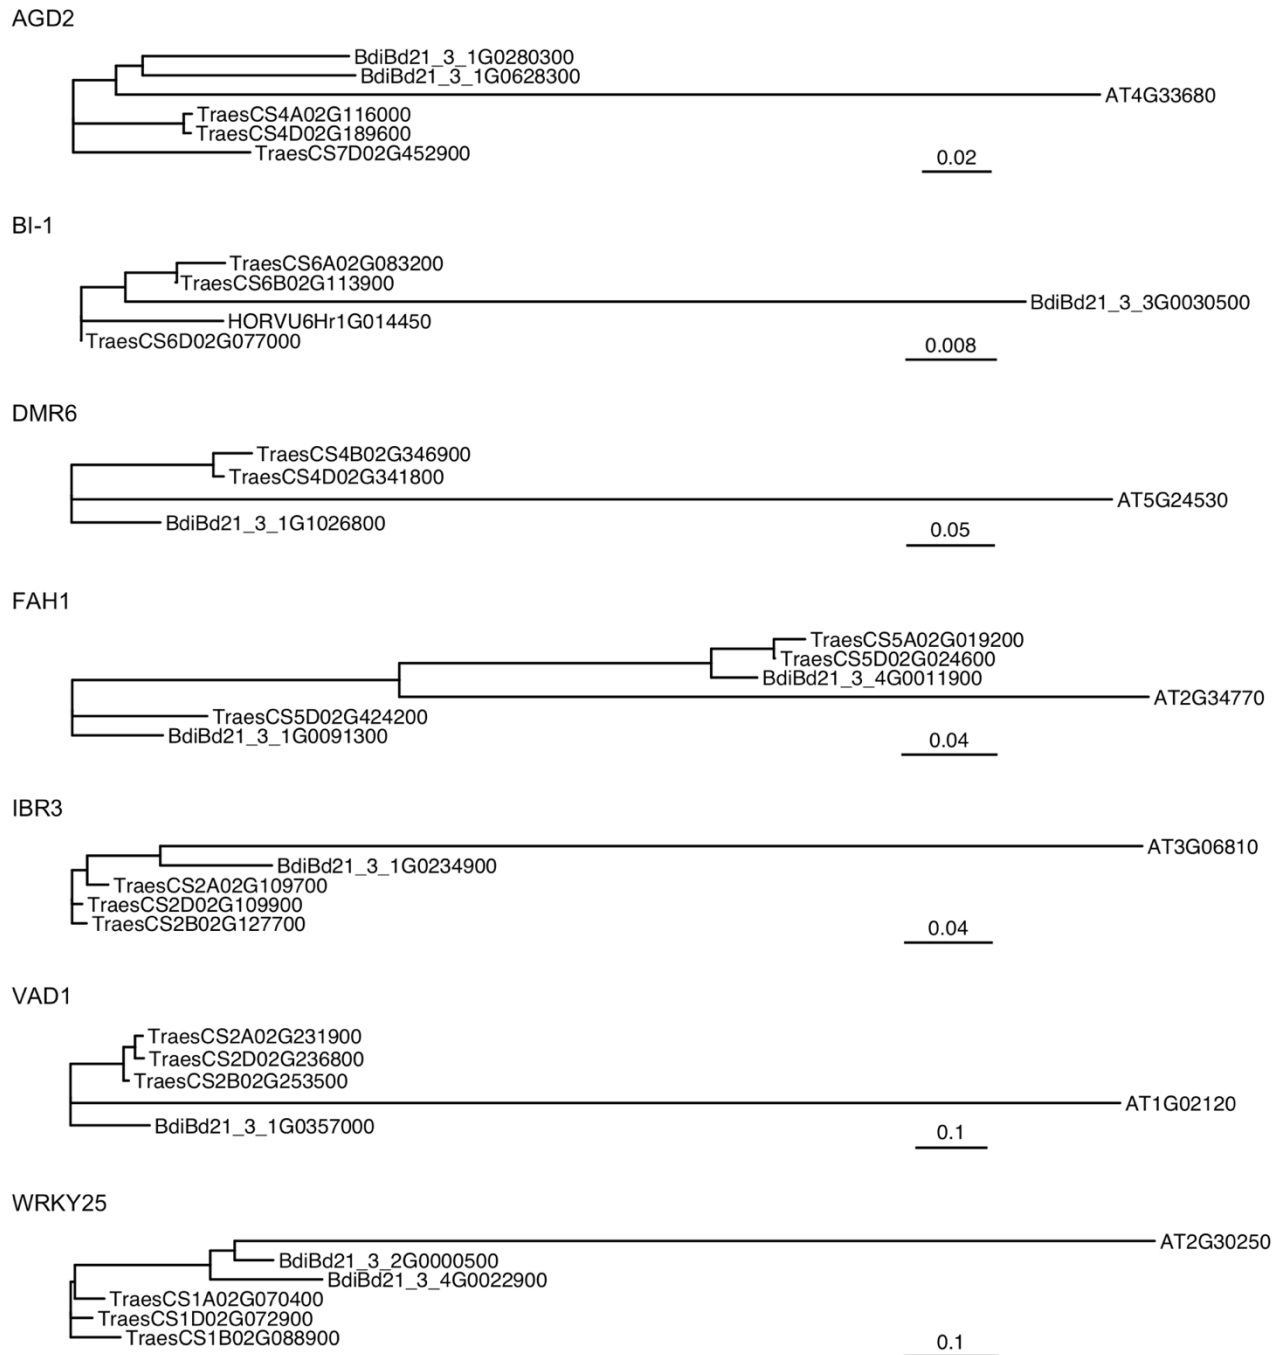

**Supplementary Figure 2.** Molecular phylogenetic analysis of amino acid sequences of orthologous genes for five of the six *S* genes of interest. The orthogroup for DND1 only included three genes (One *A. thaliana* susceptibility gene, one *T. aestivum* ortholog, and one *B. distachyon* ortholog) and so no phylogenetic tree was generated. Scale bars represent nucleotide substitutions per site.

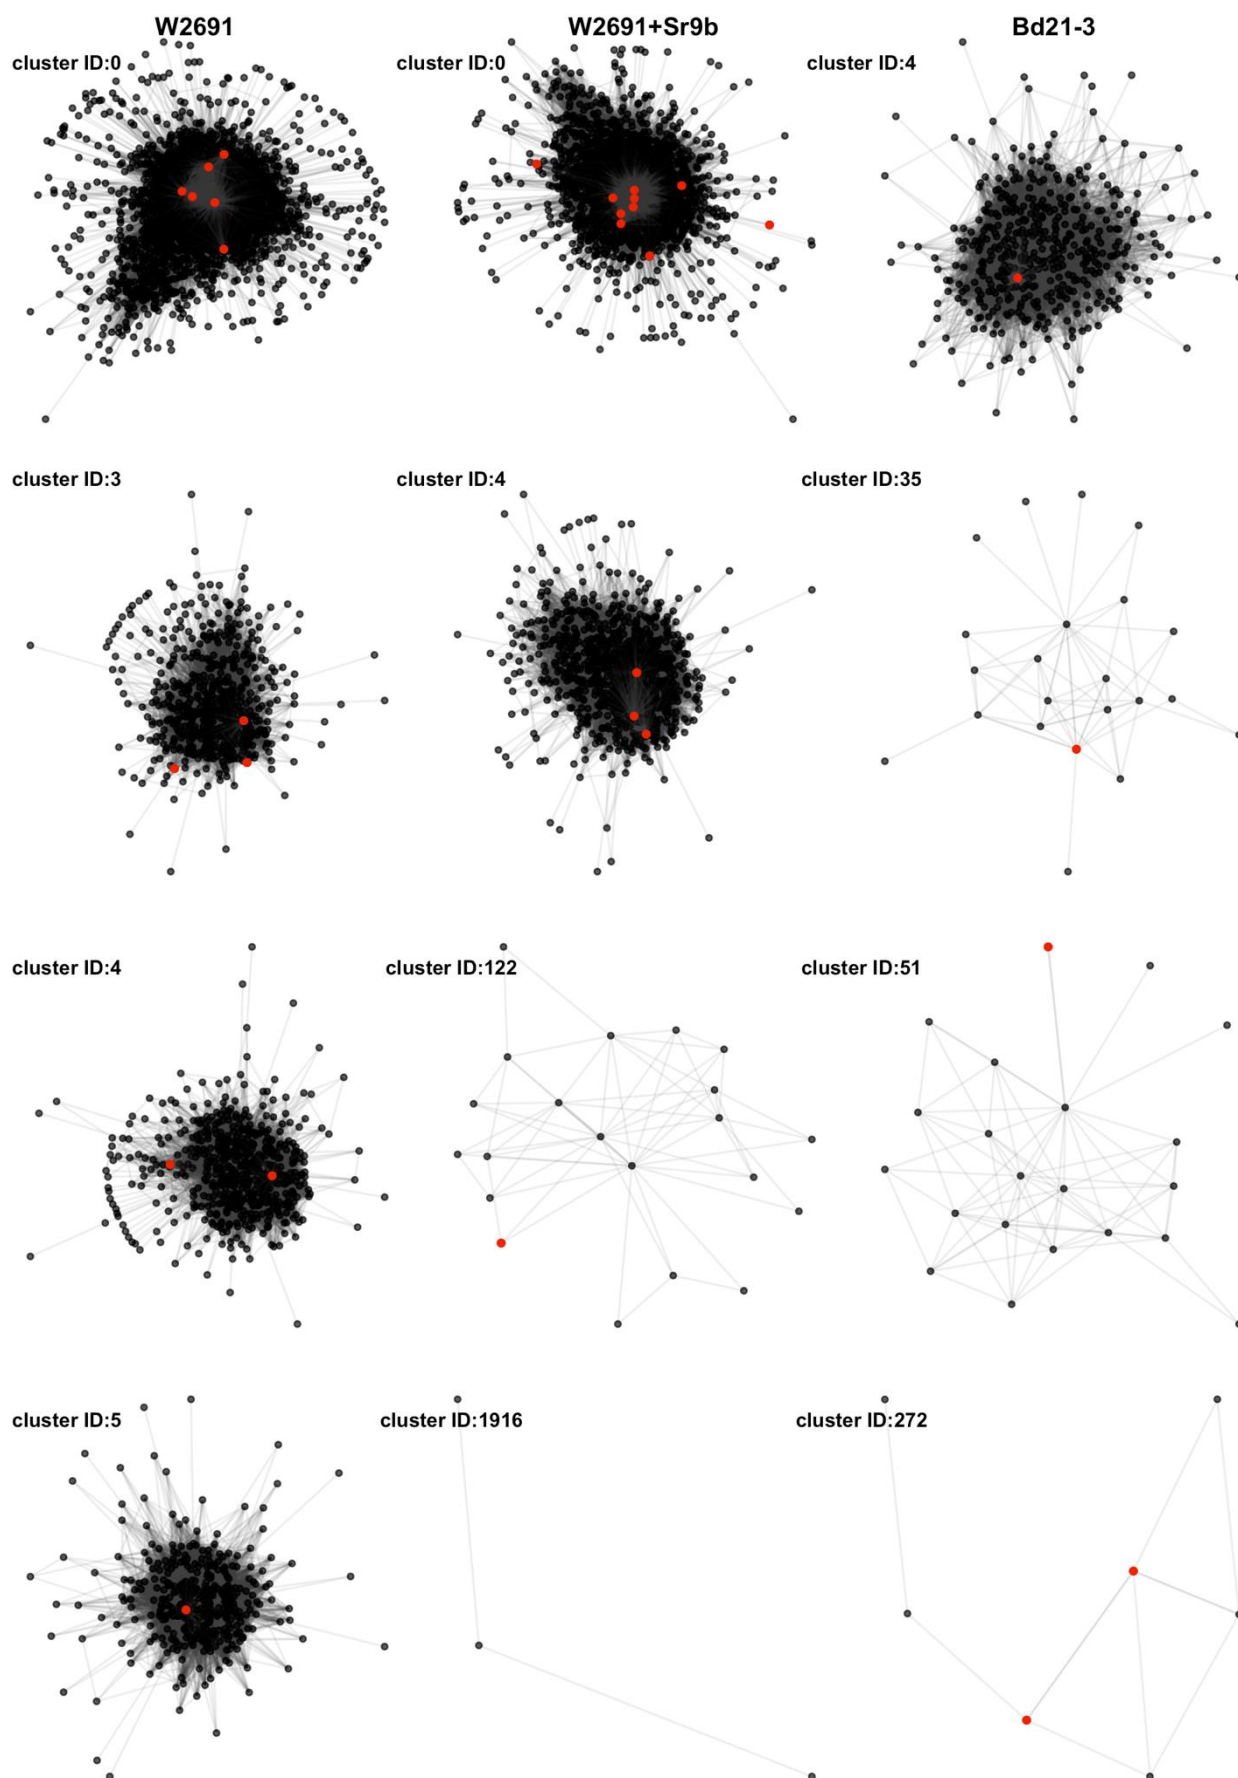

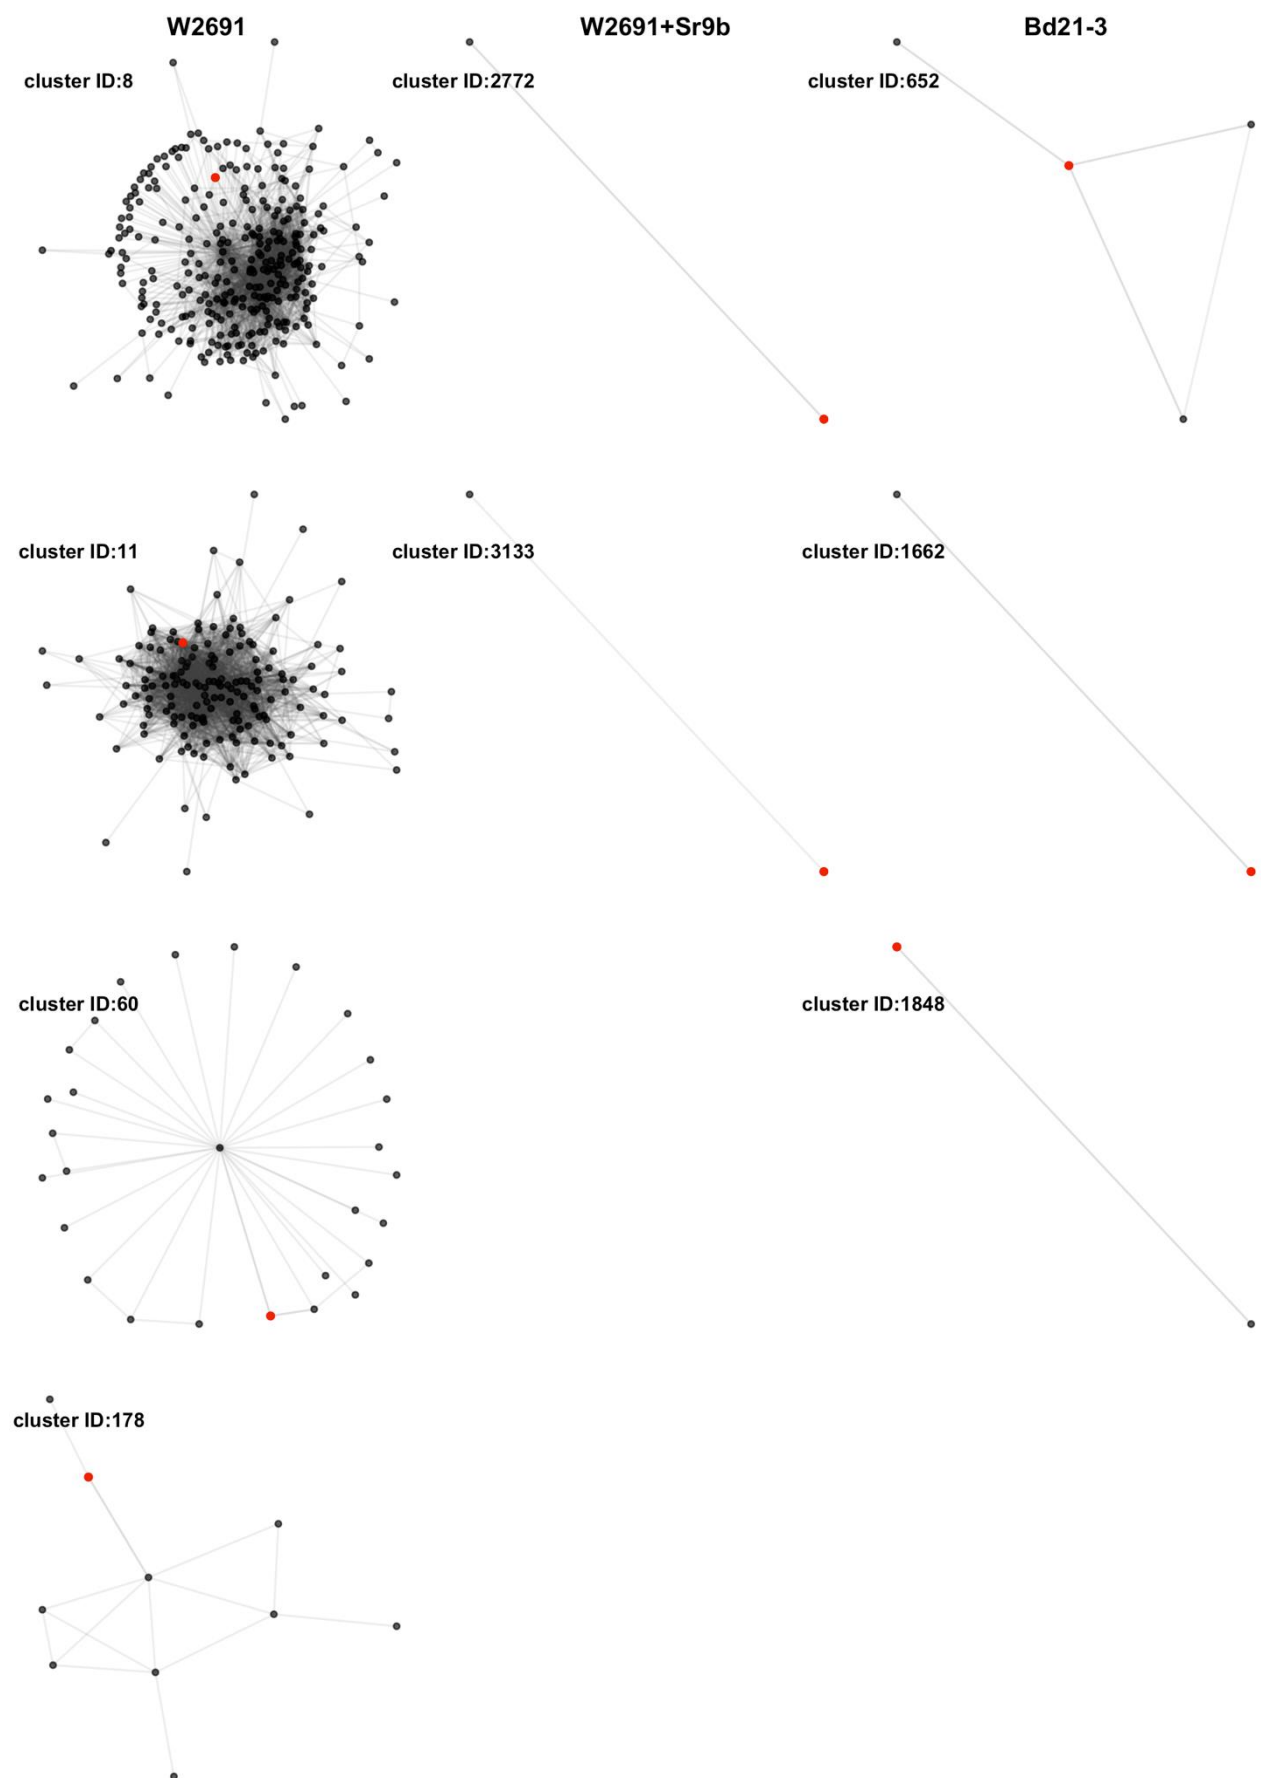

**Supplementary Figure 3.** All clusters (nodes > 1) containing a *T. aestivum* or *B. distachyon* ortholog of the eight susceptibility candidates. Red points represent *T. aestivum* and *B. distachyon* orthologs of *S* genes. Gene IDs of members in co-expression clusters are presented in Table S9.

**Table S1.** RNA-seq reads, NCBI accession numbers and mapping statistics (excel file).

**Table S2.** Enriched GO terms (Observed count over expected count) among up- and down-regulated genes at three time points across the two *T. aestivum* genotypes and *B. distachyon* Bd21-3.

**Table S3.** List of candidate susceptibility genes and orthogroups (excel file).

**Table S4.** List of orthogroups containing two or more genes including gene IDs (excel file).

**Table S5.** List of singleton orthogroups and gene IDs (excel file).

**Table S6.** Average gene expression (FPKM), orthogroup, GO terms, and cluster numbers associated with all genes in W2691, W2691+*Sr9b*, Bd21-3 (excel file).

**Table S7.** Average gene expression (FPKM), orthogroup, GO terms, and cluster numbers associated with eight *S* gene candidates in W2691, W2691+*Sr9b*, Bd21-3 (excel file).

**Table S8.** Co-expression network data for W2691, W2691+*Sr9b*, Bd21-3 genotypes using the mock and infected RNA-seq data (text file, see github page [https://github.com/henni164/stem\\_rust\\_susceptibility](https://github.com/henni164/stem_rust_susceptibility)).

**Table S9.** Co-expression network data for clusters containing *S* gene candidates (text file, see github page [https://github.com/henni164/stem\\_rust\\_susceptibility](https://github.com/henni164/stem_rust_susceptibility)).
