# Supplementary material for: Identification of Candidate Susceptibility Genes to Puccinia graminis f. sp. tritici in Wheat
Source: Front Plant Sci. 2021 Apr 21;12:657796. doi: 10.3389/fpls.2021.657796 (PMC8097158; doi:10.3389/fpls.2021.657796)
Supplement: Supplementary file 2 [file Table_2.XLSX]

## Sheet: CC
Table S2. Enriched GO terms (Observed count over expected count) among up- and down-regulated genes at three time points across the two T. aestivum genotypes and B. distachyon Bd21-3.
			W2691			W2691+Sr9b			Bd21-3
Expression	Description	GOID	2dpi	4dpi	6dpi	2dpi	4dpi	6dpi	2dpi	4dpi	6dpi
up	6-phosphofructokinase complex	GO:0005945	-	-	5.55556	-	-	-	-	-	-
up	anchored component of plasma membrane	GO:0046658	-	-	2.29804	-	2.54421	2.20615	-	-	-
up	anthranilate synthase complex	GO:0005950	-	-	-	-	-	8.82353	-	-	-
up	apicoplast	GO:0020011	-	-	10.3448	-	-	-	-	-	-
up	apoplast	GO:0048046	-	-	1.41203	2.1669	1.70308	1.64616	-	-	-
up	cell plate	GO:0009504	-	-	2.49501	-	-	-	-	-	-
up	cell wall	GO:0005618	-	-	1.67859	-	-	1.51142	-	-	-
up	chloroplast stroma	GO:0009570	-	-	1.33124	-	-	1.23688	-	-	-
up	cytosol	GO:0005829	-	-	1.31786	-	-	1.26336	-	-	-
up	cytosolic ribosome	GO:0022626	-	-	1.37399	-	-	-	-	-	-
up	endosome	GO:0005768	-	-	1.99521	-	-	1.48154	-	-	-
up	endosome membrane	GO:0010008	-	-	2.02952	-	-	-	-	-	-
up	extracellular region	GO:0005576	-	-	1.29857	-	-	1.32188	-	-	-
up	Golgi apparatus	GO:0005794	-	-	1.78157	-	-	1.41981	-	-	-
up	Golgi membrane	GO:0000139	-	1.78891	2.01865	-	-	1.50217	-	-	-
up	Golgi trans cisterna	GO:0000138	-	-	7.75862	-	-	-	-	-	-
up	integral component of plasma membrane	GO:0005887	-	2.12556	2.01827	-	1.93957	2.07219	-	-	-
up	kinesin complex	GO:0005871	-	-	2.45837	-	-	2.66223	-	-	-
up	microtubule	GO:0005874	-	-	1.78087	-	-	-	-	-	-
up	peroxisomal matrix	GO:0005782	-	5.46448	-	-	-	-	-	-	-
up	peroxisome	GO:0005777	-	2.05224	1.80457	-	1.90096	-	-	-	-
up	plant-type cell wall	GO:0009505	-	1.71405	2.00561	2.07006	1.81688	1.62527	-	-	-
up	plant-type vacuole	GO:0000325	-	1.51899	-	-	1.52818	-	-	-	-
up	plasma membrane	GO:0005886	-	1.38556	1.5656	-	1.51309	1.61801	-	-	-
up	plasmodesma	GO:0009506	-	1.43968	1.71717	-	1.71376	1.6975	-	-	-
up	plastid	GO:0009536	-	1.15316	-	-	-	-	-	-	-
up	plastid chromosome	GO:0009508	22.7273	-	-	12.069	-	-	-	-	-
up	trans-Golgi network	GO:0005802	-	-	2.43298	-	-	1.75553	-	-	-
up	trans-Golgi network membrane	GO:0032588	-	-	3.67454	-	-	-	-	-	-
up	vacuolar membrane	GO:0005774	-	-	1.50781	-	1.30735	1.33225	-	-	-
up	vacuole	GO:0005773	-	1.43806	1.48049	-	1.54484	1.47229	-	-	-
down	amyloplast	GO:0009501	-	-	3.36	-	-	5.02092	-	-	-
down	apoplast	GO:0048046	-	1.76206	1.39389	-	1.76991	1.59701	-	-	4.86726
down	chloroplast	GO:0009507	-	2.44063	2.59306	-	2.3008	2.8946	-	-	-
down	chloroplast envelope	GO:0009941	-	4.36339	4.13517	-	4.2423	4.8461	-	-	-
down	chloroplast inner membrane	GO:0009706	-	4.32692	2.62123	-	4.13081	3.65714	-	-	-
down	chloroplast membrane	GO:0031969	-	3.58598	2.86053	-	3.73832	3.43156	-	-	-
down	chloroplast nucleoid	GO:0042644	-	8.92857	8.41424	-	-	9.74576	-	-	-
down	chloroplast photosystem I	GO:0030093	-	-	14.2857	-	-	16.2791	-	-	-
down	chloroplast photosystem II	GO:0030095	-	-	11.4286	-	-	14.8148	-	-	-
down	chloroplast stroma	GO:0009570	-	4.8706	4.54655	-	4.22294	5.37281	-	-	-
down	chloroplast stromal thylakoid	GO:0009533	-	7.84314	5.69395	-	-	7.44186	-	-	-
down	chloroplast thylakoid	GO:0009534	-	4.68114	5.34789	-	4.66813	6.26967	-	-	-
down	chloroplast thylakoid lumen	GO:0009543	-	6.80412	10.5697	-	4.43787	12.9412	-	-	-
down	chloroplast thylakoid membrane	GO:0009535	-	4.53094	5.24864	-	4.63519	6.13427	-	-	-
down	chromoplast	GO:0009509	-	-	6.16114	-	-	8.07453	-	-	-
down	cyanelle stroma	GO:0034060	-	-	-	-	-	10.1695	-	-	-
down	cyanelle thylakoid membrane	GO:0033115	-	-	9.18367	-	-	12	-	-	-
down	cytosolic ribosome	GO:0022626	-	-	1.12062	-	-	1.26103	-	-	-
down	DNA helicase A complex	GO:0033203	-	21.7391	9.52381	-	-	12.5	-	-	-
down	extrinsic component of membrane	GO:0019898	-	-	2.38295	-	-	2.53025	-	-	-
down	glutaminase complex	GO:1903600	-	-	10.2041	-	-	13.1579	-	-	-
down	glycine cleavage complex	GO:0005960	-	-	6.01093	-	-	7.14286	-	-	-
down	granal stacked thylakoid	GO:0009515	-	27.7778	14.2857	-	-	18.4211	-	-	-
down	integral component of membrane	GO:0016021	1.21244	-	-	-	-	-	-	-	-
down	light-harvesting complex	GO:0030076	-	-	7.44337	-	16.6667	9.74576	-	-	-
down	magnesium chelatase complex	GO:0010007	-	-	14.2857	-	-	18.75	-	-	-
down	membrane	GO:0016020	-	-	-	-	-	-	-	-	1.33016
down	mitochondrion	GO:0005739	-	1.21286	1.18181	-	1.25191	1.23748	-	-	-
down	NAD(P)H dehydrogenase complex (plastoquinone)	GO:0010598	-	-	13.5762	-	-	16.0173	-	-	-
down	nitrite reductase complex [NAD(P)H]	GO:0009344	-	-	14.2857	-	-	18.5714	-	-	-
down	nucleoid	GO:0009295	-	-	5.21688	-	-	5.75153	-	-	-
down	nucleomorph	GO:0033009	-	-	3.95778	-	-	-	-	-	-
down	photosystem I	GO:0009522	-	10.6136	7.0006	-	18.5714	8.05051	-	-	-
down	photosystem I antenna complex	GO:0009782	-	-	14.2857	-	-	19.0476	-	-	-
down	photosystem I reaction center	GO:0009538	-	-	7.58294	-	-	8.69565	-	-	-
down	photosystem II	GO:0009523	-	6.63027	5.04965	-	9.61969	5.902	-	-	-
down	photosystem II antenna complex	GO:0009783	-	40	14.2857	-	54.5455	18.75	-	-	-
down	photosystem II oxygen evolving complex	GO:0009654	-	6.83453	8.75817	-	5.6701	10.9402	-	-	-
down	phycobilisome	GO:0030089	-	-	-	-	-	8.57143	-	-	-
down	plant-type cell wall	GO:0009505	2.42338	-	-	-	-	-	-	-	-
down	plant-type vacuole	GO:0000325	2.98507	-	-	-	-	-	-	-	-
down	plant-type vacuole membrane	GO:0009705	-	2.28277	-	-	-	-	-	-	-
down	plastid	GO:0009536	-	2.37714	2.49656	-	-	2.78396	-	-	-
down	plastid chromosome	GO:0009508	-	5.7971	7.02988	-	-	6.2069	-	-	-
down	plastid large ribosomal subunit	GO:0000311	-	22.2222	8.84354	-	-	11.5044	-	-	-
down	plastid nucleoid	GO:0042646	-	-	-	-	-	7.4224	-	-	-
down	plastid-encoded plastid RNA polymerase complex	GO:0000427	-	-	10.7143	-	-	11.6279	-	-	-
down	plastoglobule	GO:0010287	-	8.62275	7.53484	-	13.036	8.88889	-	-	-
down	proplastid stroma	GO:0009571	-	-	14.2857	-	-	-	-	-	-
down	protein acetyltransferase complex	GO:0031248	-	-	1.25541	-	-	1.24575	-	-	-
down	PSII associated light-harvesting complex II	GO:0009517	-	26.9231	10	-	27.7778	12.963	-	-	-
down	ribosome	GO:0005840	-	1.52483	1.25598	-	-	1.3764	-	-	-
down	signal recognition particle, chloroplast targeting	GO:0080085	-	-	14.2857	-	-	18.75	-	-	-
down	signal recognition particle, endoplasmic reticulum targeting	GO:0005786	-	-	4.10628	-	-	4.4164	-	-	-
down	stromal side of plastid thylakoid membrane	GO:0098572	-	-	14.2857	-	-	19.0476	-	-	-
down	stromule	GO:0010319	-	7.96646	6.93069	-	7.20721	8.06773	-	-	-
down	thylakoid	GO:0009579	-	-	4.49564	-	-	5.24868	-	-	-
down	thylakoid lumen	GO:0031977	-	6.82451	9.73137	-	4.79042	12.2016	-	-	-
down	thylakoid membrane	GO:0042651	-	-	5.26137	-	-	6.13622	-	-	-

## Sheet: MF
Table S2. Enriched GO terms (Observed count over expected count) among up- and down-regulated genes at three time points across the two T. aestivum genotypes and B. distachyon Bd21-3.
			W2691			W2691+Sr9b			Bd21-3
Expression	Description	GOID	2dpi	4dpi	6dpi	2dpi	4dpi	6dpi	2dpi	4dpi	6dpi
up	2,4-dihydroxy-7-methoxy-2H-1,4-benzoxazin-3(4H)-one 2-D-glucosyltransferase activity	GO:0047254	-	-	-	-	6.0241	-	-	-	-
up	4-coumarate-CoA ligase activity	GO:0016207	-	-	7.03125	-	-	6.55738	-	-	-
up	acid phosphatase activity	GO:0003993	-	-	-	-	-	2.8169	-	-	-
up	acidic amino acid transmembrane transporter activity	GO:0015172	-	-	3.81579	-	4.10959	4.12088	-	-	-
up	active transmembrane transporter activity	GO:0022804	-	1.47295	1.49442	-	1.50935	1.61205	-	-	-
up	alanine-glyoxylate transaminase activity	GO:0008453	-	15.3846	-	-	-	-	-	-	-
up	allene oxide synthase activity	GO:0009978	-	27.2727	11.6883	-	20.4545	12.3288	-	-	-
up	alpha-1,4-glucosidase activity	GO:0004558	-	-	2.78035	10.2564	-	-	-	-	-
up	alternative oxidase activity	GO:0009916	-	9.09091	5.58659	-	9.70874	6.43275	-	-	-
up	amine transmembrane transporter activity	GO:0005275	-	3.58527	3.55946	-	2.97749	2.62238	-	-	-
up	amino acid transmembrane transporter activity	GO:0015171	-	3.0743	3.10307	-	-	-	-	-	-
up	arginine transmembrane transporter activity	GO:0015181	-	-	4.57516	-	-	4.7619	-	-	-
up	arogenate dehydratase activity	GO:0047769	-	10.9091	-	-	-	9.01639	-	-	-
up		GO:0004067	-	-	-	33.3333	-	-	-	-	-
up	ATP binding	GO:0005524	-	-	-	-	-	1.26172	-	-	-
up	ATPase-coupled xenobiotic transmembrane transporter activity	GO:0008559	-	-	-	-	3.32717	-	-	-	-
up	beta-N-acetylglucosaminidase activity	GO:0016231	-	-	-	-	6.50888	-	-	-	-
up	betaine-aldehyde dehydrogenase activity	GO:0008802	-	20	12.2807	-	18.1818	-	-	-	-
up	betaine-homocysteine S-methyltransferase activity	GO:0047150	-	-	10.5263	-	-	-	-	-	-
up	calcium ion binding	GO:0005509	-	-	-	-	2.03316	1.63718	-	-	-
up	calcium transmembrane transporter activity, phosphorylative mechanism	GO:0005388	-	-	-	-	-	3.93375	-	-	-
up	calcium-dependent phospholipid binding	GO:0005544	-	-	-	-	-	3.10811	-	-	-
up	calmodulin binding	GO:0005516	-	-	-	-	-	1.70843	-	-	-
up	carbohydrate binding	GO:0030246	-	-	-	-	-	1.53774	-	-	-
up	cellulose synthase (UDP-forming) activity	GO:0016760	-	-	3.46021	-	-	-	-	-	-
up	chalcone isomerase activity	GO:0045430	-	-	6.71642	-	-	-	-	-	-
up	chitin binding	GO:0008061	-	-	-	6.57895	4.32099	3.41753	-	-	-
up	chitinase activity	GO:0004568	-	-	-	-	-	3.37682	-	-	-
up	cis-zeatin O-beta-D-glucosyltransferase activity	GO:0050502	-	-	-	-	2.61569	2.17918	-	-	-
up	coenzyme binding	GO:0050662	-	-	1.82798	-	-	1.6197	-	-	-
up	copper ion binding	GO:0005507	-	-	1.84657	-	-	1.66433	-	-	-
up	cytokinin 7-beta-glucosyltransferase activity	GO:0047807	-	-	-	-	6.17284	-	-	-	-
up	cytokinin 9-beta-glucosyltransferase activity	GO:0080062	-	-	-	-	6.17284	-	-	-	-
up	D-ribose transmembrane transporter activity	GO:0015591	-	-	-	-	-	4.40252	-	-	-
up	D-xylose transmembrane transporter activity	GO:0015148	-	-	-	-	-	4.40252	-	-	-
up	dihydrolipoyllysine-residue (2-methylpropanoyl)transferase activity	GO:0043754	-	-	8.33333	-	-	-	-	-	-
up	dipeptide transmembrane transporter activity	GO:0071916	-	4.3956	2.84698	-	3.7037	3.71287	-	-	-
up	dTDP-glucose 4,6-dehydratase activity	GO:0008460	-	-	6.95652	-	-	-	-	-	-
up	endochitinase activity	GO:0008843	-	-	-	-	6.11111	-	-	-	-
up	endonuclease activity	GO:0004519	3.55412	-	-	-	-	-	-	-	-
up	enoyl-[acyl-carrier-protein] reductase (NADH) activity	GO:0004318	-	-	15.7895	-	-	13.5135	-	-	-
up	enoyl-[acyl-carrier-protein] reductase activity	GO:0016631	-	-	15.7895	-	-	13.5135	-	-	-
up	flavonol synthase activity	GO:0045431	-	4.64548	3.28042	-	4.0367	-	-	-	-
up	fructan beta-(2,1)-fructosidase activity	GO:0033948	-	-	4.47761	-	-	-	-	-	-
up	fructan beta-fructosidase activity	GO:0051669	-	6.45161	3.91061	25.641	5.33981	-	-	-	-
up	galactose transmembrane transporter activity	GO:0005354	-	-	3.97878	-	-	4.70914	-	-	-
up	galactosylxylosylprotein 3-beta-galactosyltransferase activity	GO:0047220	-	-	4.81928	-	-	-	-	-	-
up	gamma-aminobutyric acid transmembrane transporter activity	GO:0015185	-	-	5.21739	-	-	-	-	-	-
up	GDP-mannose 3,5-epimerase activity	GO:0047918	-	-	-	-	-	13.5135	-	-	-
up	gibberellin 3-beta-dioxygenase activity	GO:0016707	-	9.09091	5.88235	-	6.80272	-	-	-	-
up	glucan endo-1,3-beta-D-glucosidase activity	GO:0042973	-	-	2.73092	-	4.45682	4.44258	-	-	-
up	glucuronoxylan glucuronosyltransferase activity	GO:0080116	-	-	6.45161	-	-	-	-	-	-
up	glutathione binding	GO:0043295	-	-	-	-	-	3.0303	-	-	-
up	glutathione transferase activity	GO:0004364	-	-	-	-	2.77027	2.72358	-	-	-
up	glycogenin glucosyltransferase activity	GO:0008466	-	-	7.86517	-	-	-	-	-	-
up	guanosine-diphosphatase activity	GO:0004382	-	-	-	-	-	5.66038	-	-	-
up	heme binding	GO:0020037	-	-	-	-	1.66912	1.37626	-	-	-
up	high-affinity oligopeptide transmembrane transporter activity	GO:0015334	-	-	-	-	-	3.90764	-	-	-
up	histone demethylase activity (H3-K36 specific)	GO:0051864	-	35.2941	15.7895	-	-	16.2162	-	-	-
up	hydrolase activity, hydrolyzing O-glycosyl compounds	GO:0004553	-	-	2.21901	-	-	-	-	-	-
up	hydroperoxide dehydratase activity	GO:0047987	-	21.9512	9.375	-	16.3636	9.78261	-	-	-
up	indole-3-glycerol-phosphate synthase activity	GO:0004425	-	-	-	-	-	9.83607	-	-	-
up	intramolecular oxidoreductase activity, interconverting keto- and enol-groups	GO:0016862	-	-	6.42857	-	-	-	-	-	-
up	iron ion binding	GO:0005506	-	1.84339	-	-	1.93808	1.51429	-	-	-
up	L-glutamate transmembrane transporter activity	GO:0005313	-	-	-	-	-	4.57516	-	-	-
up	L-isoleucine transaminase activity	GO:0052656	-	-	6.71642	-	-	-	-	-	-
up	L-leucine transaminase activity	GO:0052654	-	-	6.71642	-	-	-	-	-	-
up	L-lysine transmembrane transporter activity	GO:0015189	-	-	4.57516	-	-	4.7619	-	-	-
up	L-pipecolate oxidase activity	GO:0050031	-	20	-	-	15	-	-	-	-
up	L-valine transaminase activity	GO:0052655	-	-	6.71642	-	-	-	-	-	-
up	leucocyanidin oxygenase activity	GO:0050589	-	-	6.18182	-	6.96203	-	-	-	-
up	linoleate 13S-lipoxygenase activity	GO:0016165	-	7.39437	4.55927	-	5.27704	4.60317	-	-	-
up	linoleic acid epoxygenase activity	GO:0071614	-	-	4.62633	-	-	-	-	-	-
up	manganese ion binding	GO:0030145	-	-	-	-	-	1.96982	-	-	-
up	mannitol transmembrane transporter activity	GO:0015575	-	-	-	-	-	4.40252	-	-	-
up	mannose-1-phosphate guanylyltransferase (GDP) activity	GO:0008928	-	-	6.95652	-	-	-	-	-	-
up	mannose-1-phosphate guanylyltransferase activity	GO:0004475	-	-	10.5263	-	-	10.9091	-	-	-
up	methyl indole-3-acetate esterase activity	GO:0080030	-	-	2.33781	-	3.0426	2.43902	-	-	-
up	methyl jasmonate esterase activity	GO:0080032	-	-	2.33781	-	3.0426	2.43902	-	-	-
up	methyl salicylate esterase activity	GO:0080031	-	-	2.33781	-	3.0426	2.43902	-	-	-
up	microtubule binding	GO:0008017	-	-	1.97714	-	-	-	-	-	-
up	monooxygenase activity	GO:0004497	-	1.78662	-	-	1.92162	-	-	-	-
up	N-formylglutamate deformylase activity	GO:0050129	-	-	12.2807	-	-	12.7273	-	-	-
up	NAD binding	GO:0051287	-	-	2.16369	-	-	-	-	-	-
up	neutral amino acid transmembrane transporter activity	GO:0015175	-	-	3.57143	-	-	-	-	-	-
up	nucleotide transmembrane transporter activity	GO:0015215	-	-	2.41667	-	-	-	-	-	-
up	oxalate oxidase activity	GO:0050162	-	-	-	-	3.91061	4.25532	-	-	-
up	oxidoreductase activity, acting on paired donors, with incorporation or reduction of molecular oxygen	GO:0016705	-	-	-	-	1.90225	-	-	-	-
up	oxidoreductase activity, acting on single donors with incorporation of molecular oxygen, incorporation of two atoms of oxygen	GO:0016702	-	3.66178	2.64901	-	3.0969	-	-	-	-
up	pectin acetylesterase activity	GO:0052793	-	-	8.43373	-	-	-	-	-	-
up	phenylalanine ammonia-lyase activity	GO:0045548	-	-	-	-	8.73786	9.62099	-	-	-
up	Photinus-luciferin 4-monooxygenase (ATP-hydrolyzing) activity	GO:0047077	-	7.56303	4.36364	-	-	-	-	-	-
up	prephenate dehydratase activity	GO:0004664	-	-	-	-	-	8.14815	-	-	-
up	protein disulfide oxidoreductase activity	GO:0015035	-	-	-	-	-	-	-	-	6.25
up	protein self-association	GO:0043621	-	-	2.59987	-	2.86029	2.64725	-	-	-
up	protein serine/threonine kinase activity	GO:0004674	-	-	-	-	1.49697	1.57037	-	-	-
up	putrescine N-methyltransferase activity	GO:0030750	-	-	9.09091	-	-	-	-	-	-
up	pyridoxal phosphate binding	GO:0030170	-	-	2.16949	-	2.46914	-	-	-	-
up	retinyl-palmitate esterase activity	GO:0050253	-	-	2.20318	-	2.65393	-	-	-	-
up	ribonuclease T2 activity	GO:0033897	-	-	5.58659	-	-	-	-	-	-
up	S-adenosylmethionine-homocysteine S-methyltransferase activity	GO:0008898	-	-	10.5263	-	-	-	-	-	-
up	salicylic acid glucosyltransferase (glucoside-forming) activity	GO:0052640	-	-	-	-	6.25	-	-	-	-
up	sarcosine oxidase activity	GO:0008115	-	16.6667	-	-	12.5	-	-	-	-
up	single-stranded DNA endodeoxyribonuclease activity	GO:0000014	-	-	-	-	-	5	-	-	-
up	sorbitol transmembrane transporter activity	GO:0015576	-	-	-	-	-	4.40252	-	-	-
up	spermidine synthase activity	GO:0004766	-	-	7.86517	-	-	-	-	-	-
up	sucrose 1F-fructosyltransferase activity	GO:0050306	-	7.43802	-	33.3333	6.17284	-	-	-	-
up	sucrose alpha-glucosidase activity	GO:0004575	-	3.80952	3.09278	11.4286	3.22004	-	-	-	-
up	T/G mismatch-specific endonuclease activity	GO:0043765	-	9.72222	-	-	-	6.91824	-	-	-
up	thiosulfate sulfurtransferase activity	GO:0004792	-	10	-	-	-	-	-	-	-
up	trans-zeatin O-beta-D-glucosyltransferase activity	GO:0050403	-	-	-	-	2.67035	2.21607	-	-	-
up	transferase activity, transferring glycosyl groups	GO:0016757	-	-	2.0312	-	-	-	-	-	-
up	transmembrane receptor protein serine/threonine kinase activity	GO:0004675	-	-	-	-	2.52413	2.45645	-	-	-
up	trehalose-phosphatase activity	GO:0004805	-	-	5.52995	-	-	5.76923	-	-	-
up	triglyceride lipase activity	GO:0004806	-	-	-	-	-	2.42377	-	-	-
up	tripeptide transmembrane transporter activity	GO:0042937	-	4.3956	2.84698	-	3.7037	3.71287	-	-	-
up	UDP-arabinopyranose mutase activity	GO:0052691	-	-	9.375	-	-	7.6087	-	-	-
up	UDP-glucose 4-epimerase activity	GO:0003978	-	-	7.84314	-	-	6.80272	-	-	-
up	UDP-glucose:4-aminobenzoate acylglucosyltransferase activity	GO:0080002	-	-	-	-	-	3.60934	-	-	-
up	UDP-glucuronate decarboxylase activity	GO:0048040	-	-	10.0917	-	-	8.65385	-	-	-
up	uridine-diphosphatase activity	GO:0045134	-	-	-	-	-	5.66038	-	-	-
up	xyloglucan:xyloglucosyl transferase activity	GO:0016762	-	-	3.23232	-	-	-	-	-	-
up	zinc ion transmembrane transporter activity	GO:0005385	-	-	3.68664	-	-	-	-	-	-
down	(+)-delta-cadinene synthase activity	GO:0047461	-	5.19481	-	-	-	-	-	-	-
down	[ribulose-bisphosphate carboxylase]-lysine N-methyltransferase activity	GO:0030785	-	-	8.54701	-	-	8.98876	-	-	-
down	2 iron, 2 sulfur cluster binding	GO:0051537	-	-	2.35616	-	3.86266	2.5289	-	-	-
down	2,3-dihydro-2,3-dihydroxybenzoate dehydrogenase activity	GO:0008667	-	-	-	-	-	-	-	5.82011	4.62963
down	3 iron, 4 sulfur cluster binding	GO:0051538	-	-	-	-	-	9.52381	-	-	-
down	3-hydroxybutyrate dehydrogenase activity	GO:0003858	-	-	12.1951	-	-	-	-	-	-
down	3,8-divinyl protochlorophyllide a 8-vinyl reductase activity	GO:0051744	-	-	12.1951	-	-	16.129	-	-	-
down	4-hydroxy-3-methylbut-2-en-1-yl diphosphate reductase activity	GO:0051745	-	-	-	-	60	-	-	-	-
down	4-hydroxy-3-methylbut-2-en-1-yl diphosphate synthase activity	GO:0046429	-	40	14.6341	-	54.5455	19.3548	-	-	-
down	acetylajmaline esterase activity	GO:0033879	-	21.4286	-	-	36.8421	14.0351	-	-	-
down	adenosylmethionine decarboxylase activity	GO:0004014	-	15.7895	-	-	-	-	-	-	-
down	alditol:NADP+ 1-oxidoreductase activity	GO:0004032	-	-	-	-	-	8.97436	-	-	-
down	aminomethyltransferase activity	GO:0004047	-	-	10.9091	-	-	14.2857	-	-	-
down	antioxidant activity	GO:0016209	-	-	1.04365	-	-	1.07157	-	-	-
down	antiporter activity	GO:0015297	-	2.66328	-	-	-	-	-	-	-
down	aryl-alcohol dehydrogenase (NAD+) activity	GO:0018456	-	7.61905	-	-	-	-	-	-	-
down	asparaginase activity	GO:0004067	-	-	-	-	-	12.3596	-	-	-
down	ATP binding	GO:0005524	-	-	1.18539	-	-	-	-	-	-
down	ATP-dependent peptidase activity	GO:0004176	-	-	3.36391	-	-	3.42742	-	-	-
down	beta-aspartyl-peptidase activity	GO:0008798	-	-	-	-	-	8.65385	-	-	-
down	borate efflux transmembrane transporter activity	GO:0080139	-	-	8.88889	-	-	-	-	-	-
down	calcium ion binding	GO:0005509	-	-	1.6218	-	-	-	-	-	-
down	calcium-dependent cysteine-type endopeptidase activity	GO:0004198	-	-	5.16432	-	-	-	-	-	-
down	carotene beta-ring hydroxylase activity	GO:0010291	-	-	11.1111	-	-	-	-	-	-
down	carotenoid isomerase activity	GO:0046608	-	-	-	-	-	13.5135	-	-	-
down	chalcone isomerase activity	GO:0045430	33.3333	-	-	-	-	7.27273	-	-	-
down	chlorophyll binding	GO:0016168	-	15.051	8.28678	-	25.8182	9.44785	-	-	-
down	cis-trans isomerase activity	GO:0016859	-	-	3.27763	-	-	3.895	-	-	-
down	cobaltochelatase activity	GO:0051116	-	-	-	-	60	-	-	-	-
down	delta 3-trans-hexadecenoic acid phosphatidylglycerol desaturase activity	GO:0052637	-	-	-	-	60	-	-	-	-
down	deoxyribodipyrimidine photo-lyase activity	GO:0003904	-	16.6667	-	-	-	11.1111	-	-	-
down	electron transfer activity	GO:0009055	-	-	1.38491	-	-	1.52378	-	-	-
down	electron transporter, transferring electrons within the cyclic electron transport pathway of photosynthesis activity	GO:0045156	-	-	3.2872	-	-	3.64465	-	-	-
down	electron transporter, transferring electrons within the noncyclic electron transport pathway of photosynthesis activity	GO:0045157	-	-	-	-	-	9.52381	-	-	-
down	fatty acid alpha-hydroxylase activity	GO:0080132	75	-	-	-	-	-	-	-	-
down	ferredoxin-nitrite reductase activity	GO:0048307	-	-	-	-	60	-	-	-	-
down	ferric-chelate reductase activity	GO:0000293	-	-	12.1951	-	-	-	-	-	-
down	FK506 binding	GO:0005528	-	-	4.90018	-	-	5.74163	-	-	-
down	fructose 1,6-bisphosphate 1-phosphatase activity	GO:0042132	-	-	9.40171	-	-	13.4831	-	-	-
down	fructose-bisphosphate aldolase activity	GO:0004332	-	-	-	-	-	7.2	-	-	-
down	glutamyl-tRNA reductase activity	GO:0008883	-	15.7895	-	-	23.0769	-	-	-	-
down	glutathione dehydrogenase (ascorbate) activity	GO:0045174	-	-	-	-	-	9.58904	-	-	-
down	glyceraldehyde-3-phosphate dehydrogenase (NAD+) (phosphorylating) activity	GO:0004365	-	-	5.92105	-	-	7.82609	-	-	-
down	glyceraldehyde-3-phosphate dehydrogenase (NADP+) (phosphorylating) activity	GO:0047100	-	-	14.6341	-	-	19.3548	-	-	-
down	glycerol transmembrane transporter activity	GO:0015168	-	-	3.36842	-	-	-	-	-	-
down	glycogen (starch) synthase activity	GO:0004373	-	-	5.28634	-	-	8.13953	-	-	-
down	haloalkane dehalogenase activity	GO:0018786	-	-	14.4737	-	-	19.2982	-	-	-
down	heat shock protein binding	GO:0031072	-	-	2.5289	-	3.81895	2.42857	-	-	-
down	heme binding	GO:0020037	-	-	-	-	-	-	-	2.23176	2.07078
down	heteropolysaccharide binding	GO:0010297	-	-	-	-	-	10.2564	-	-	-
down	inorganic anion exchanger activity	GO:0005452	-	-	6.45161	-	-	-	-	-	-
down	inorganic diphosphate transmembrane transporter activity	GO:0030504	-	14.5833	7.63359	-	-	10.101	-	-	-
down	inositol pentakisphosphate 2-kinase activity	GO:0035299	-	-	-	-	-	5.31915	-	-	-
down	inositol trisphosphate phosphatase activity	GO:0046030	-	-	-	-	-	3.41297	-	-	-
down	iron ion binding	GO:0005506	-	1.61095	-	-	-	1.52386	-	2.56142	2.15497
down	iron-sulfur cluster binding	GO:0051536	-	-	2.47117	-	-	2.7614	-	-	-
down	L-ascorbic acid transmembrane transporter activity	GO:0015229	-	26.6667	14.6341	-	-	19.3548	-	-	-
down	lactoylglutathione lyase activity	GO:0004462	-	-	-	-	-	6.16438	-	-	-
down	lithocholate 6beta-hydroxylase activity	GO:0033777	-	-	-	-	-	13.5135	-	-	-
down	lycopene epsilon cyclase activity	GO:0045435	-	-	-	-	60	-	-	-	-
down	magnesium chelatase activity	GO:0016851	-	-	5.28634	-	-	6.97674	-	-	-
down	magnesium protoporphyrin IX methyltransferase activity	GO:0046406	-	-	-	-	-	19.0476	-	-	-
down	magnesium-protoporphyrin IX monomethyl ester (oxidative) cyclase activity	GO:0048529	-	-	-	-	60	-	-	-	-
down	mannitol dehydrogenase activity	GO:0046029	-	8.60215	-	-	-	-	-	-	-
down	mannose binding	GO:0005537	-	10.3448	-	-	-	-	-	-	-
down	metal ion binding	GO:0046872	-	1.11634	-	-	1.22401	-	-	-	-
down	metalloendopeptidase activity	GO:0004222	-	-	3.10717	-	-	3.17726	-	-	-
down	methylated-DNA-[protein]-cysteine S-methyltransferase activity	GO:0003908	-	-	8.43373	-	-	9.52381	-	-	-
down	molybdopterin cofactor binding	GO:0043546	-	13.9535	7.69231	-	20	-	-	-	-
down	monooxygenase activity	GO:0004497	-	-	-	-	-	1.56779	-	2.42567	2.47083
down	NADPH dehydrogenase activity	GO:0003959	-	-	5.92105	-	-	7.82609	-	-	-
down	naringenin-chalcone synthase activity	GO:0016210	-	5.76923	-	-	-	-	-	-	-
down	nitrate reductase (NADH) activity	GO:0009703	-	-	-	-	13.0435	-	-	-	-
down	nitrate reductase (NADPH) activity	GO:0050464	-	26.087	-	-	37.5	-	-	-	-
down	oxidoreductase activity	GO:0016491	-	-	-	-	-	-	-	1.95312	1.91245
down	oxidoreductase activity, acting on a sulfur group of donors, disulfide as acceptor	GO:0016671	-	-	4.48549	-	-	4.69565	-	-	-
down	oxidoreductase activity, acting on paired donors, with incorporation or reduction of molecular oxygen	GO:0016705	-	-	-	-	-	-	-	2.45951	2.31579
down	peptidyl-prolyl cis-trans isomerase activity	GO:0003755	-	-	2.6204	-	-	2.98786	-	-	-
down	phosphoglycolate phosphatase activity	GO:0008967	-	-	4.29043	-	-	-	-	-	-
down	phospholipid-hydroperoxide glutathione peroxidase activity	GO:0047066	-	-	10.5263	-	-	12.2807	-	-	-
down	phosphoribosylaminoimidazole carboxylase activity	GO:0004638	-	12	5.7971	-	16.9811	7.64331	-	-	-
down	pigment binding	GO:0031409	-	21.1765	14.1026	-	35	17.4157	-	-	-
down	plastoquinol--plastocyanin reductase activity	GO:0009496	-	-	-	-	-	19.0476	-	-	-
down	poly(U) RNA binding	GO:0008266	-	7.03125	6.69516	-	5.55556	8.25516	-	-	-
down	polysaccharide binding	GO:0030247	-	-	1.96952	-	-	-	-	-	-
down	precorrin-2 dehydrogenase activity	GO:0043115	-	-	-	-	60	-	-	-	-
down	protein disulfide oxidoreductase activity	GO:0015035	-	-	-	-	3.24074	-	-	-	-
down	protein serine/threonine kinase activity	GO:0004674	-	-	1.27383	-	-	-	-	-	-
down	protein-disulfide reductase activity	GO:0047134	-	-	3.42577	-	-	-	-	-	-
down	ribulose-1,5-bisphosphate carboxylase/oxygenase activator activity	GO:0046863	-	-	12.9032	-	-	14.8936	-	-	-
down	ribulose-bisphosphate carboxylase activity	GO:0016984	-	7.9646	8.3871	-	-	10.2128	-	-	-
down	rRNA binding	GO:0019843	-	3.25511	2.18112	-	-	2.40175	-	-	-
down	serine O-acetyltransferase activity	GO:0009001	-	-	-	-	-	7.69231	-	-	-
down	sinapoyl spermidine:sinapoyl CoA N-acyltransferase activity	GO:0080089	150	-	-	-	-	-	-	-	-
down	spermidine:sinapoyl CoA N-acyltransferase activity	GO:0080072	150	-	-	-	-	-	-	-	-
down	starch binding	GO:2001070	-	7.31707	5.63798	-	-	7.42188	-	-	-
down	starch synthase activity	GO:0009011	-	-	5.45455	-	-	8.38323	-	-	-
down	sucrose transmembrane transporter activity	GO:0008515	-	-	2.7611	-	-	-	-	-	-
down	sulfite reductase (ferredoxin) activity	GO:0050311	-	-	-	-	60	-	-	-	-
down	sulfite reductase activity	GO:0016002	-	-	-	-	60	-	-	-	-
down	thioredoxin-disulfide reductase activity	GO:0004791	-	-	2.96192	-	-	-	-	-	-
down	translation release factor activity	GO:0003747	-	-	-	-	-	4.32099	-	-	-
down	triose-phosphate transmembrane transporter activity	GO:0071917	-	-	5.51724	-	-	-	-	-	-
down	unfolded protein binding	GO:0051082	-	-	1.85874	-	2.54545	-	-	-	-
down	violaxanthin de-epoxidase activity	GO:0046422	-	-	12.1951	-	-	16.129	-	-	-
down	zeinoxanthin epsilon hydroxylase activity	GO:0009974	-	-	11.5942	-	-	-	-	-	-

## Sheet: BP
Table S2. Enriched GO terms (Observed count over expected count) among up- and down-regulated genes at three time points across the two T. aestivum genotypes and B. distachyon Bd21-3.
			W2691			W2691+Sr9b			Bd21-3
Expression	Description	GOID	2dpi	4dpi	6dpi	2dpi	4dpi	6dpi	2dpi	4dpi	6dpi
up	abscisic acid-activated signaling pathway	GO:0009738	-	2.30356	2.18622	-	2.36994	2.35647	-	-	-
up	acetyl-CoA metabolic process	GO:0006084	-	-	3.18594	-	-	2.25843	-	-	-
up	acidic amino acid transport	GO:0015800	-	-	3.92405	-	4.17582	4.08432	-	-	-
up	aging	GO:0007568	-	2.3187	-	-	-	-	-	-	-
up	alcohol biosynthetic process	GO:0046165	-	2.4608	2.70921	-	2.12495	2.06882	-	-	-
up	alcohol metabolic process	GO:0006066	-	-	2.24889	-	-	1.89737	-	-	-
up	amine biosynthetic process	GO:0009309	-	-	2.15909	-	-	2.02805	-	-	-
up	amine catabolic process	GO:0009310	-	-	1.90857	-	-	-	-	-	-
up	amine metabolic process	GO:0009308	-	1.96121	1.93797	-	1.93814	2.08169	-	-	-
up	amine transport	GO:0015837	-	4.2292	3.66647	-	3.18275	2.58462	-	-	-
up	amino acid import	GO:0043090	-	-	2.37144	-	2.36002	2.69071	-	-	-
up	amino acid transmembrane transport	GO:0003333	-	3.43228	3.33735	-	2.72346	2.34408	-	-	-
up	amino acid transport	GO:0006865	-	-	-	-	-	2.26707	-	-	-
up	ammonium transport	GO:0015696	-	-	1.96947	-	2.39521	2.51153	-	-	-
up	anatomical structure formation involved in morphogenesis	GO:0048646	-	-	1.46432	-	-	-	-	-	-
up	animal organ development	GO:0048513	-	-	1.28548	-	-	-	-	-	-
up	animal organ senescence	GO:0010260	-	2.54027	2.31059	-	2.65982	1.98601	-	-	-
up	anther development	GO:0048653	-	-	2.07708	-	-	2.11437	-	-	-
up	anthocyanin accumulation in tissues in response to UV light	GO:0043481	-	-	1.85236	-	-	-	-	-	-
up	anthocyanin-containing compound biosynthetic process	GO:0009718	-	2.46085	2.45796	-	-	1.75025	-	-	-
up	arginine catabolic process to glutamate	GO:0019544	-	17.1429	11.25	-	-	-	-	-	-
up	ATP biosynthetic process	GO:0006754	-	-	-	-	-	1.33391	-	-	-
up	auxin catabolic process	GO:0009852	-	20.8333	-	-	-	-	-	-	-
up	auxin-activated signaling pathway	GO:0009734	-	-	1.63376	-	-	-	-	-	-
up	basic amino acid transport	GO:0015802	-	-	3.03797	-	3.2967	3.49144	-	-	-
up	brassinosteroid biosynthetic process	GO:0016132	-	3.03644	3.86078	-	2.28542	2.49619	-	-	-
up	brassinosteroid metabolic process	GO:0016131	-	-	-	-	2.50537	2.51073	-	-	-
up	calcium ion transmembrane transport	GO:0070588	-	-	-	-	-	3.16206	-	-	-
up	carbohydrate metabolic process	GO:0005975	-	-	1.77602	-	-	1.47077	-	-	-
up	carbohydrate transport	GO:0008643	-	-	2.04622	-	-	-	-	-	-
up	carboxylic acid metabolic process	GO:0019752	-	-	1.67152	-	-	1.64639	-	-	-
up	cell tip growth	GO:0009932	-	-	1.74616	-	-	-	-	-	-
up	cell wall biogenesis	GO:0042546	-	-	2.194	-	-	-	-	-	-
up	cell wall macromolecule catabolic process	GO:0016998	-	-	-	6.30631	4.11919	3.62585	-	-	-
up	cell wall modification	GO:0042545	-	-	1.82038	-	-	-	-	-	-
up	cell wall organization	GO:0071555	-	-	2.02217	-	1.53569	1.57331	-	-	-
up	cell wall pectin metabolic process	GO:0052546	-	-	2.93917	-	-	-	-	-	-
up	cellular amine metabolic process	GO:0044106	-	-	1.89972	-	-	2.15577	-	-	-
up	cellular amino acid biosynthetic process	GO:0008652	-	-	-	-	1.65567	1.834	-	-	-
up	cellular cation homeostasis	GO:0030003	-	-	1.69403	-	2.09685	-	-	-	-
up	cellular component organization or biogenesis	GO:0071840	-	-	-	0.881857	0.9136	0.953054	-	-	-
up	cellular ketone metabolic process	GO:0042180	-	1.93584	1.74948	-	1.74466	1.82109	-	-	-
up	cellular lipid metabolic process	GO:0044255	-	1.48941	1.45898	-	1.3245	1.31079	-	-	-
up	cellular modified amino acid biosynthetic process	GO:0042398	-	-	2.19512	-	3.20629	3.26442	-	-	-
up	cellular modified amino acid metabolic process	GO:0006575	-	2.10396	1.95815	-	2.88775	2.87629	-	-	-
up	cellular response to hydrogen peroxide	GO:0070301	-	-	-	-	2.06327	1.73196	-	-	-
up	cellular response to iron ion starvation	GO:0010106	-	2.91929	2.08437	-	2.75743	3.04752	-	-	-
up	cellular response to nitrogen starvation	GO:0006995	-	-	-	-	3.11641	2.74725	-	-	-
up	cellular response to phosphate starvation	GO:0016036	-	2.58242	1.92995	-	-	2.00893	-	-	-
up	cellular response to sulfate starvation	GO:0009970	-	-	-	-	-	4.81928	-	-	-
up	cellular zinc ion homeostasis	GO:0006882	-	-	-	-	-	3.78788	-	-	-
up	cellulose biosynthetic process	GO:0030244	-	-	2.83764	-	-	-	-	-	-
up	cellulose metabolic process	GO:0030243	-	-	2.8582	-	-	-	-	-	-
up	chemical synaptic transmission	GO:0007268	-	-	-	-	-	2.15786	-	-	-
up	chitin catabolic process	GO:0006032	-	-	-	-	3.6566	3.33651	-	-	-
up	chlorophyll catabolic process	GO:0015996	-	-	-	-	-	2.29153	-	-	-
up	chlorophyll metabolic process	GO:0015994	-	1.60223	-	-	1.31096	-	-	-	-
up	chloroplast fission	GO:0010020	-	-	3.64372	-	-	-	-	-	-
up	cinnamic acid biosynthetic process	GO:0009800	-	-	-	-	8.18182	9.23913	-	-	-
up	coumarin biosynthetic process	GO:0009805	-	3.06604	2.40164	-	3.46051	4.04255	-	-	-
up	cyanide metabolic process	GO:0019499	-	-	-	-	12	-	-	-	-
up	cytokinin metabolic process	GO:0009690	-	-	-	-	-	2.18598	-	-	-
up	cytoskeleton organization	GO:0007010	-	-	1.53808	-	-	-	-	-	-
up	D-ribose transmembrane transport	GO:0015752	-	-	-	-	-	4.54545	-	-	-
up	D-xylose metabolic process	GO:0042732	-	-	2.88115	-	-	-	-	-	-
up	D-xylose transmembrane transport	GO:0015753	-	-	-	-	-	4.54545	-	-	-
up	defense response by callose deposition	GO:0052542	-	-	-	-	-	2.08105	-	-	-
up	defense response to bacterium	GO:0042742	-	-	-	-	1.71576	1.9456	-	-	-
up	defense response to bacterium, incompatible interaction	GO:0009816	-	-	-	-	-	2.45291	-	-	-
up	defense response to fungus	GO:0050832	-	-	-	-	1.92946	1.84701	-	-	-
up	defense response to fungus, incompatible interaction	GO:0009817	-	-	-	-	2.50128	2.32629	-	-	-
up	dephosphorylation	GO:0016311	-	-	-	-	-	1.18119	-	-	-
up	detection of biotic stimulus	GO:0009595	-	2.44975	1.38889	-	2.93144	2.63605	-	-	-
up	detection of external stimulus	GO:0009581	-	-	-	-	1.82672	1.59574	-	-	-
up	dicarboxylic acid metabolic process	GO:0043648	-	-	-	-	-	2.51844	-	-	-
up	dipeptide transport	GO:0042938	-	4.53258	2.94479	-	3.83795	3.83142	-	-	-
up	divalent metal ion transport	GO:0070838	-	-	1.88001	-	-	-	-	-	-
up	DNA unwinding involved in DNA replication	GO:0006268	-	-	5.78035	-	-	6.62651	-	-	-
up	drought recovery	GO:0009819	-	-	-	-	5.55556	6.86275	-	-	-
up	dTDP-rhamnose biosynthetic process	GO:0019305	-	-	9.90991	-	-	-	-	-	-
up	endoplasmic reticulum to Golgi vesicle-mediated transport	GO:0006888	-	-	1.82977	-	-	1.79795	-	-	-
up	endoplasmic reticulum unfolded protein response	GO:0030968	-	-	1.66412	-	2.02591	2.52887	-	-	-
up	epidermal cell differentiation	GO:0009913	-	-	1.84802	-	-	1.53257	-	-	-
up	epoxygenase P450 pathway	GO:0019373	-	28.125	12.1622	-	20.9302	12.6761	-	-	-
up	ER-nucleus signaling pathway	GO:0006984	-	-	1.64384	-	1.96638	2.49097	-	-	-
up	ethylene biosynthetic process	GO:0009693	-	2.2818	-	-	2.14777	2.00824	-	-	-
up	ethylene-activated signaling pathway	GO:0009873	-	-	1.72798	-	-	2.20503	-	-	-
up	flavonol biosynthetic process	GO:0051555	-	3.98506	2.91577	-	3.37711	2.41709	-	-	-
up	focal adhesion assembly	GO:0048041	-	-	-	-	5.6338	4.55312	-	-	-
up	fruit development	GO:0010154	-	-	1.53935	-	-	-	-	-	-
up	fruit ripening	GO:0009835	-	-	2.52613	-	-	-	-	-	-
up	G2/M transition of mitotic cell cycle	GO:0000086	-	-	1.3151	-	-	-	-	-	-
up	galactose transmembrane transport	GO:0015757	-	-	4.18994	-	-	4.94186	-	-	-
up	gamma-aminobutyric acid transport	GO:0015812	-	-	5.40541	-	-	-	-	-	-
up	gibberellin biosynthetic process	GO:0009686	-	2.86659	2.10325	-	-	-	-	-	-
up	gluconeogenesis	GO:0006094	-	-	2.2067	-	-	-	-	-	-
up	glucose catabolic process	GO:0006007	-	-	1.59748	-	-	-	-	-	-
up	glucuronoxylan biosynthetic process	GO:0010417	-	-	5.25164	-	-	-	-	-	-
up	glutamine biosynthetic process	GO:0006542	-	-	6.33803	-	-	-	-	-	-
up	glutathione metabolic process	GO:0006749	-	-	-	-	-	2.49057	-	-	-
up	glycine betaine biosynthetic process from choline	GO:0019285	-	-	9.45946	-	13.9535	-	-	-	-
up	glycoside metabolic process	GO:0016137	-	-	1.76909	-	-	-	-	-	-
up	Golgi organization	GO:0007030	-	-	1.7654	-	-	-	-	-	-
up	heat acclimation	GO:0010286	-	3.73599	2.59249	-	-	-	-	-	-
up	histone H3-K36 demethylation	GO:0070544	-	37.5	16.2162	-	-	16.6667	-	-	-
up	histone H3-K9 methylation	GO:0051567	-	-	2.00974	-	-	-	-	-	-
up	hyperosmotic response	GO:0006972	-	-	2.66842	-	-	-	-	-	-
up	hyperosmotic salinity response	GO:0042538	-	2.87141	2.83291	-	2.60025	2.66717	-	-	-
up	indolebutyric acid metabolic process	GO:0080024	-	-	-	-	-	4.07609	-	-	-
up	inflorescence morphogenesis	GO:0048281	-	-	-	-	-	4.77707	-	-	-
up	inorganic anion transport	GO:0015698	-	-	1.89342	-	2.33042	2.42848	-	-	-
up	iron ion transport	GO:0006826	-	2.33867	1.85881	-	2.28162	2.54055	-	-	-
up	isoleucine biosynthetic process	GO:0009097	-	-	5.94595	-	-	-	-	-	-
up	jasmonic acid and ethylene-dependent systemic resistance, ethylene mediated signaling pathway	GO:0009871	-	-	-	-	6.07735	-	-	-	-
up	jasmonic acid biosynthetic process	GO:0009695	-	2.5702	2.1259	-	2.1147	2.08423	-	-	-
up	jasmonic acid mediated signaling pathway	GO:0009867	-	2.15004	1.80363	-	2.02322	2.49974	-	-	-
up	L-lysine catabolic process to acetyl-CoA via L-pipecolate	GO:0033514	-	20.6897	-	-	15.3846	-	-	-	-
up	L-phenylalanine biosynthetic process	GO:0009094	-	-	-	-	-	7.30337	-	-	-
up	L-phenylalanine catabolic process	GO:0006559	-	-	-	-	6.95364	7.14286	-	-	-
up	leaf senescence	GO:0010150	-	-	2.0324	-	2.40409	1.93192	-	-	-
up	leucine catabolic process	GO:0006552	-	10	9.375	-	-	6.49351	-	-	-
up	lignin biosynthetic process	GO:0009809	-	2.8692	2.12143	-	2.66667	2.32204	-	-	-
up	lignin catabolic process	GO:0046274	-	-	-	-	4.1876	4.31727	-	-	-
up	lysine transport	GO:0015819	-	-	-	-	-	5.09804	-	-	-
up	maintenance of seed dormancy by absisic acid	GO:0098755	-	-	5.39216	-	-	-	-	-	-
up	mannitol transport	GO:0015797	-	-	-	-	-	4.54545	-	-	-
up	MAPK cascade	GO:0000165	-	-	-	-	1.57239	1.78202	-	-	-
up	membrane fusion	GO:0061025	-	-	1.66044	-	1.82605	1.78597	-	-	-
up	microtubule bundle formation	GO:0001578	-	-	3.61905	-	-	-	-	-	-
up	microtubule nucleation	GO:0007020	-	-	2.60766	-	-	-	-	-	-
up	microtubule-based movement	GO:0007018	-	-	2.24	-	-	-	-	-	-
up	monocarboxylic acid metabolic process	GO:0032787	-	1.73419	1.68861	-	-	1.68295	-	-	-
up	multi-organism process	GO:0051704	-	-	-	-	1.28761	1.23149	-	-	-
up	multidimensional cell growth	GO:0009825	-	-	2.06704	-	-	-	-	-	-
up	negative regulation of abscisic acid-activated signaling pathway	GO:0009788	-	4.70085	2.87037	-	3.37621	-	-	-	-
up	negative regulation of anion channel activity	GO:0010360	-	17.1429	8.75	-	-	-	-	-	-
up	negative regulation of cell death	GO:0060548	-	-	-	-	-	2.46107	-	-	-
up	negative regulation of defense response	GO:0031348	-	1.88318	1.56358	-	2.01826	2.37649	-	-	-
up	negative regulation of programmed cell death	GO:0043069	-	1.78398	1.81435	-	2.29548	2.37189	-	-	-
up	negative regulation of response to water deprivation	GO:0080148	-	-	-	-	-	5.23256	-	-	-
up	neurotransmitter catabolic process	GO:0042135	-	-	1.96257	-	-	1.5677	-	-	-
up	neutral amino acid transport	GO:0015804	-	-	2.40272	-	2.62089	-	-	-	-
up	nitrate transport	GO:0015706	-	2.28351	1.74875	-	2.45591	2.58332	-	-	-
up	nucleotide transport	GO:0006862	-	2.71357	2.61324	-	2.49622	2.81052	-	-	-
up	oligopeptide transport	GO:0006857	-	-	2.06742	-	-	2.36257	-	-	-
up	oxalate metabolic process	GO:0033609	-	-	-	-	-	2.46744	-	-	-
up	oxidation-reduction process	GO:0055114	-	1.4663	1.31009	-	1.43295	1.30336	-	-	-
up	oxylipin biosynthetic process	GO:0031408	-	4.17607	2.59422	-	3.05862	2.54712	-	-	-
up	para-aminobenzoic acid metabolic process	GO:0046482	-	3.51827	2.46624	-	3.16004	2.50611	-	-	-
up	pattern specification process	GO:0007389	-	-	1.47779	-	-	-	-	-	-
up	phenylpropanoid biosynthetic process	GO:0009699	-	2.472	1.98443	-	-	2.08315	-	-	-
up	phenylpropanoid metabolic process	GO:0009698	-	2.306	-	-	-	1.98778	-	-	-
up	phosphate ion transmembrane transport	GO:0035435	-	-	2.331	-	-	-	-	-	-
up	plant-type cell wall biogenesis	GO:0009832	-	-	2.94848	-	-	1.82553	-	-	-
up	plant-type cell wall cellulose metabolic process	GO:0052541	-	-	2.78746	-	-	-	-	-	-
up	plant-type cell wall organization	GO:0009664	-	-	2.09411	-	-	-	-	-	-
up	plant-type secondary cell wall biogenesis	GO:0009834	-	-	3.83023	-	-	-	-	-	-
up	pollen development	GO:0009555	-	-	1.66527	-	-	1.79895	-	-	-
up	pollen exine formation	GO:0010584	-	-	2.68895	-	-	2.57186	-	-	-
up	polyamine catabolic process	GO:0006598	-	-	-	-	4.11141	4.69372	-	-	-
up	polysaccharide biosynthetic process	GO:0000271	-	-	1.90323	-	-	-	-	-	-
up	polysaccharide catabolic process	GO:0000272	-	-	2.01583	-	1.86674	1.86538	-	-	-
up	positive regulation of cellular biosynthetic process	GO:0031328	-	-	1.12048	-	1.05045	0.988957	-	-	-
up	positive regulation of flavonoid biosynthetic process	GO:0009963	-	2.27801	1.97501	-	2.69419	2.51731	-	-	-
up	positive regulation of secondary metabolite biosynthetic process	GO:1900378	-	2.1978	1.8438	-	2.66187	2.45849	-	-	-
up	post-embryonic animal organ development	GO:0048569	-	-	1.31651	-	-	-	-	-	-
up	proline transport	GO:0015824	-	-	2.08978	3.90805	2.28495	2.09452	-	-	-
up	proteasomal protein catabolic process	GO:0010498	-	-	0.736467	-	-	0.630324	-	-	-
up	protein folding	GO:0006457	-	1.91067	1.49543	-	-	-	-	-	-
up	protein homooligomerization	GO:0051260	-	3.19149	-	-	-	-	-	-	-
up	protein homotetramerization	GO:0051289	-	-	-	-	-	4.49438	-	-	-
up	protein phosphorylation	GO:0006468	-	-	-	-	1.20078	1.23483	-	-	-
up	protein polymerization	GO:0051258	-	-	1.99184	-	-	-	-	-	-
up	protein targeting to membrane	GO:0006612	-	2.04835	1.79229	-	2.15338	2.29033	-	-	-
up	protein unfolding	GO:0043335	-	26.3158	-	-	-	-	-	-	-
up	regulation of floral meristem growth	GO:0010080	-	-	7.69231	-	-	7.9646	-	-	-
up	regulation of hormone levels	GO:0010817	-	-	1.89589	-	-	-	-	-	-
up	regulation of hydrogen peroxide metabolic process	GO:0010310	-	-	-	-	2.11161	2.32874	-	-	-
up	regulation of inflorescence meristem growth	GO:0010081	-	-	9.09091	-	-	9.47368	-	-	-
up	regulation of ion transport	GO:0043269	-	-	1.31549	-	1.70307	1.62162	-	-	-
up	regulation of meristem growth	GO:0010075	-	-	2.39762	-	-	1.75167	-	-	-
up	regulation of multi-organism process	GO:0043900	-	-	-	-	2.28665	2.27662	-	-	-
up	regulation of multicellular organismal development	GO:2000026	-	-	1.55059	-	-	-	-	-	-
up	regulation of phenylpropanoid metabolic process	GO:2000762	-	-	1.78359	-	2.24574	2.07334	-	-	-
up	regulation of plant-type hypersensitive response	GO:0010363	-	2.15705	1.85398	-	2.23647	2.38258	-	-	-
up	regulation of stomatal movement	GO:0010119	-	-	2.02056	-	-	-	-	-	-
up	respiratory burst involved in defense response	GO:0002679	-	-	1.97478	-	2.27179	2.89747	-	-	-
up	respiratory gaseous exchange by respiratory system	GO:0007585	-	-	4.05405	-	5.84795	4.5614	-	-	-
up	response to abiotic stimulus	GO:0009628	-	-	-	-	1.55033	1.56683	-	-	-
up	response to abscisic acid	GO:0009737	-	2.19595	1.93857	-	1.99716	1.99552	-	-	-
up	response to absence of light	GO:0009646	-	-	-	-	-	3.6036	-	-	-
up	response to arsenic-containing substance	GO:0046685	-	4.79798	2.73673	-	3.70722	2.5641	-	-	-
up	response to auxin	GO:0009733	-	-	1.67231	-	-	1.50116	-	-	-
up	response to bacterium	GO:0009617	-	-	-	-	1.82518	1.89759	-	-	-
up	response to cadmium ion	GO:0046686	-	2.0948	2.00268	-	2.13304	1.90898	-	-	-
up	response to carbohydrate	GO:0009743	-	2.03985	1.92498	-	1.77844	1.95247	-	-	-
up	response to chitin	GO:0010200	-	2.22342	1.8114	-	2.24082	2.40369	-	-	-
up	response to cold	GO:0009409	-	1.85292	1.63177	-	1.72609	1.64114	-	-	-
up	response to copper ion	GO:0046688	-	-	3.01303	-	-	-	-	-	-
up	response to cyclopentenone	GO:0010583	-	2.97741	2.22568	-	2.97527	2.8962	-	-	-
up	response to desiccation	GO:0009269	-	3.37243	2.5413	-	-	-	-	-	-
up	response to endoplasmic reticulum stress	GO:0034976	-	2.15772	1.82962	-	2.19954	2.32698	-	-	-
up	response to ethanol	GO:0045471	-	7.98319	4.91803	-	4.43038	-	-	-	-
up	response to ethylene	GO:0009723	-	2.03655	1.79609	-	2.17505	2.14454	-	-	-
up	response to flooding	GO:0009413	-	-	8.75	-	-	-	-	-	-
up	response to fructose	GO:0009750	-	2.86703	2.82898	-	2.27019	2.1419	-	-	-
up	response to fungus	GO:0009620	-	1.79634	1.56214	-	1.92031	1.90435	-	-	-
up	response to gibberellin	GO:0009739	-	-	2.20793	-	-	1.73724	-	-	-
up	response to glucose	GO:0009749	-	-	2.34796	-	-	2.00321	-	-	-
up	response to growth hormone	GO:0060416	-	-	-	-	-	2.90011	-	-	-
up	response to heat	GO:0009408	-	2.74867	2.16888	-	1.87556	1.56166	-	-	-
up	response to high light intensity	GO:0009644	-	3.17226	2.1753	-	2.02721	-	-	-	-
up	response to hydrogen peroxide	GO:0042542	-	2.45726	1.96387	-	2.20364	1.80328	-	-	-
up	response to inorganic substance	GO:0010035	-	-	-	-	1.90915	1.83275	-	-	-
up	response to insect	GO:0009625	-	-	2.3514	-	-	2.65306	-	-	-
up	response to jasmonic acid	GO:0009753	-	2.28474	1.85116	-	2.12857	2.37159	-	-	-
up	response to karrikin	GO:0080167	-	2.41427	2.14133	-	2.56145	2.50124	-	-	-
up	response to light stimulus	GO:0009416	-	-	-	-	-	1.47252	-	-	-
up	response to mechanical stimulus	GO:0009612	-	-	2.20386	-	-	2.81124	-	-	-
up	response to metal ion	GO:0010038	-	-	1.8735	-	-	-	-	-	-
up	response to molecule of bacterial origin	GO:0002237	-	-	-	-	-	1.91761	-	-	-
up	response to nematode	GO:0009624	-	-	-	-	-	2.18114	-	-	-
up	response to nitrate	GO:0010167	-	2.29344	1.78458	-	2.41257	2.56104	-	-	-
up	response to osmotic stress	GO:0006970	-	-	1.95426	-	-	-	-	-	-
up	response to oxidative stress	GO:0006979	-	-	-	-	1.89346	1.6942	-	-	-
up	response to salicylic acid	GO:0009751	-	2.21497	1.81465	-	2.2711	2.31217	-	-	-
up	response to salt stress	GO:0009651	-	1.91069	1.90526	-	1.82186	1.84913	-	-	-
up	response to stimulus	GO:0050896	-	-	-	-	1.20803	-	-	-	-
up	response to sucrose	GO:0009744	-	2.40741	2.15157	-	-	1.70483	-	-	-
up	response to temperature stimulus	GO:0009266	-	-	1.80194	-	-	-	-	-	-
up	response to UV-B	GO:0010224	-	-	1.72263	-	-	2.06583	-	-	-
up	response to virus	GO:0009615	-	1.41671	-	-	-	-	-	-	-
up	response to water deprivation	GO:0009414	-	1.94727	1.71456	-	1.90277	1.80667	-	-	-
up	response to wounding	GO:0009611	-	2.15292	1.8442	-	2.13163	2.41446	-	-	-
up	root hair elongation	GO:0048767	-	-	1.97861	-	-	1.50292	-	-	-
up	S-methylmethionine cycle	GO:0033528	-	-	10.7143	-	-	-	-	-	-
up	salicylic acid biosynthetic process	GO:0009697	-	-	1.85923	-	2.65181	2.71889	-	-	-
up	salicylic acid catabolic process	GO:0046244	-	-	-	-	9.94475	10.2649	-	-	-
up	salicylic acid mediated signaling pathway	GO:0009863	-	-	1.81651	-	2.27816	2.4544	-	-	-
up	salicylic acid metabolic process	GO:0009696	-	-	-	-	-	3.02596	-	-	-
up	secondary metabolic process	GO:0019748	-	2.08809	1.74183	-	2.01634	1.86761	-	-	-
up	seed trichome differentiation	GO:0090376	-	-	5.49133	-	-	-	-	-	-
up	short-chain fatty acid catabolic process	GO:0019626	-	-	-	-	12	-	-	-	-
up	short-chain fatty acid transport	GO:0015912	-	-	5.40541	-	-	-	-	-	-
up	signal transduction	GO:0007165	-	-	-	-	1.3324	-	-	-	-
up	small molecule biosynthetic process	GO:0044283	-	1.67652	1.71994	-	1.55945	1.66005	-	-	-
up	somatic embryogenesis	GO:0010262	-	-	-	-	9.41176	7.04225	-	-	-
up	sorbitol transport	GO:0015795	-	-	-	-	-	4.54545	-	-	-
up	starch metabolic process	GO:0005982	-	-	1.99022	-	-	-	-	-	-
up	sterol biosynthetic process	GO:0016126	-	2.3908	3.10881	-	2.28374	2.42739	-	-	-
up	stigma development	GO:0048480	-	-	-	-	-	7.35294	-	-	-
up	systemic acquired resistance	GO:0009627	-	-	1.63057	-	2.37335	2.41305	-	-	-
up	systemic acquired resistance, salicylic acid mediated signaling pathway	GO:0009862	-	2.28277	1.62809	-	2.41131	2.42606	-	-	-
up	threonine catabolic process	GO:0006567	-	-	5.78035	-	-	6.62651	-	-	-
up	toxin catabolic process	GO:0009407	-	2.35094	1.7575	-	2.51346	2.58303	-	-	-
up	trehalose biosynthetic process	GO:0005992	-	-	3.8	-	-	3.95833	-	-	-
up	trichoblast differentiation	GO:0010054	-	-	1.89364	-	-	-	-	-	-
up	tripeptide transport	GO:0042939	-	4.26667	2.77778	-	3.61446	3.61446	-	-	-
up	tryptophan biosynthetic process	GO:0000162	-	-	-	-	-	4.10095	-	-	-
up	tube development	GO:0035295	-	-	1.62138	-	-	-	-	-	-
up	UDP-L-arabinose metabolic process	GO:0033356	-	-	9.09091	-	-	8.42105	-	-	-
up	unidimensional cell growth	GO:0009826	-	-	-	-	-	1.48625	-	-	-
up	valine catabolic process	GO:0006574	-	-	8.67052	-	-	7.22892	-	-	-
up	water transport	GO:0006833	-	-	2.35344	-	-	1.83767	-	-	-
up	xyloglucan metabolic process	GO:0010411	-	-	2.44738	-	-	-	-	-	-
up	zinc ion transmembrane transport	GO:0071577	-	-	4.10367	-	-	-	-	-	-
down	'de novo' IMP biosynthetic process	GO:0006189	-	5.88235	-	-	6.99301	3.75587	-	-	-
down	alcohol metabolic process	GO:0006066	-	-	1.61947	-	-	1.93857	-	-	-
down	amylopectin biosynthetic process	GO:0010021	-	-	-	-	-	7.29927	-	-	-
down	anatomical structure formation involved in morphogenesis	GO:0048646	-	-	1.20195	-	-	1.27854	-	-	-
down	animal organ morphogenesis	GO:0009887	-	-	1.49798	-	-	1.53788	-	-	-
down	anthocyanin-containing compound biosynthetic process	GO:0009718	-	3.45964	-	-	-	2.55805	-	-	-
down	aromatic amino acid family biosynthetic process	GO:0009073	-	4.30108	3.68646	-	4.44785	4.21161	-	-	-
down	asparagine catabolic process via L-aspartate	GO:0033345	-	-	-	-	-	8.91089	-	-	-
down	aspartate transmembrane transport	GO:0015810	-	-	-	-	16.6667	-	-	-	-
down	auxin polar transport	GO:0009926	-	2.2605	-	-	-	1.87709	-	-	-
down	borate transmembrane transport	GO:0035445	-	-	6.46766	-	-	-	-	-	-
down	carbohydrate transmembrane transport	GO:0034219	-	-	2.62118	-	-	-	-	-	-
down	carotene biosynthetic process	GO:0016120	-	14.6341	7.89474	-	-	11.6279	-	-	-
down	carotenoid biosynthetic process	GO:0016117	-	4.01969	5.06517	-	3.74707	6.07605	-	-	-
down	cell differentiation	GO:0030154	-	-	1.01443	-	-	1.10608	-	-	-
down	cell redox homeostasis	GO:0045454	-	-	1.7713	-	-	1.97968	-	-	-
down	cellular cation homeostasis	GO:0030003	-	1.81456	1.73364	-	2.02084	1.89278	-	-	-
down	cellular response to abscisic acid stimulus	GO:0071215	-	-	1.40647	-	-	-	-	-	-
down	cellular response to blue light	GO:0071483	-	-	2.03252	-	2.6738	-	-	-	-
down	cellular response to boron-containing substance levels	GO:0080029	-	-	5.47264	-	-	-	-	-	-
down	cellular response to hydrogen peroxide	GO:0070301	-	2.21998	1.76685	-	-	2.07329	-	-	-
down	cellular response to light stimulus	GO:0071482	-	-	2.97387	-	-	3.10139	-	-	-
down	cellular response to osmotic stress	GO:0071470	-	-	0.583622	-	-	-	-	-	-
down	cellular response to oxidative stress	GO:0034599	-	-	1.94175	-	-	2.2131	-	-	-
down	cellular response to phosphate starvation	GO:0016036	-	-	1.75285	-	2.94372	1.94316	-	-	-
down	cellular response to potassium ion starvation	GO:0051365	-	-	5.55556	-	-	5.35117	-	-	-
down	cellular response to salicylic acid stimulus	GO:0071446	-	-	1.74716	-	-	-	-	-	-
down	cellular response to sulfate starvation	GO:0009970	-	-	-	-	-	4.50704	-	-	-
down	central nervous system myelin maintenance	GO:0032286	100	-	-	-	-	-	-	-	-
down	chalcone biosynthetic process	GO:0009715	-	9.91736	-	-	-	4.72441	-	-	-
down	chaperone-mediated protein folding	GO:0061077	-	-	2.77136	-	-	3.51682	-	-	-
down	chlorophyll biosynthetic process	GO:0015995	-	6.36792	5.87401	-	5.49944	7.09992	-	-	-
down	chlorophyll catabolic process	GO:0015996	-	-	1.82738	-	-	2.23214	-	-	-
down	chloroplast mRNA processing	GO:0010239	-	-	10.6383	-	-	-	-	-	-
down	chloroplast organization	GO:0009658	-	4.32619	5.44575	-	3.06011	6.1105	-	-	-
down	chloroplast relocation	GO:0009902	-	3.90244	7.39697	-	3.20334	7.97203	-	-	-
down	chloroplast RNA processing	GO:0031425	-	-	2.65439	-	-	-	-	-	-
down	chloroplast rRNA processing	GO:1901259	-	18.1818	8.26446	-	-	12.0879	-	-	-
down	circadian rhythm	GO:0007623	-	3.7518	2.83928	-	3.91349	3.34367	-	-	-
down	coenzyme biosynthetic process	GO:0009108	-	-	2.23647	-	-	-	-	-	-
down	coumarin biosynthetic process	GO:0009805	6.47059	-	-	-	-	-	-	-	-
down	cysteine biosynthetic process	GO:0019344	-	4.9569	4.84342	-	5.91852	5.56128	-	-	-
down	cysteine biosynthetic process from serine	GO:0006535	-	-	4.29293	-	-	5.01672	-	-	-
down	cytochrome b6f complex assembly	GO:0010190	-	-	12.987	-	-	10.2564	-	-	-
down	defense response to bacterium	GO:0042742	-	-	1.46697	-	-	1.35478	-	-	-
down	dephosphorylation	GO:0016311	-	-	2.30837	-	-	-	-	-	-
down	detection of biotic stimulus	GO:0009595	-	1.8724	2.6296	-	-	2.25389	-	-	-
down	dimethylallyl diphosphate biosynthetic process	GO:0050992	-	-	-	-	60	-	-	-	-
down	divalent metal ion transport	GO:0070838	-	1.79577	1.88152	-	2.31156	2.15379	-	-	-
down	DNA-templated transcription, elongation	GO:0006354	-	2.95567	1.70697	-	-	2.02353	-	-	-
down	drug transmembrane transport	GO:0006855	-	2.82686	-	-	-	-	-	-	-
down	electron transport chain	GO:0022900	-	-	3.19549	-	-	3.49975	-	-	-
down	fructose catabolic process	GO:0006001	-	-	8.64198	-	-	13.1148	-	-	-
down	galactolipid biosynthetic process	GO:0019375	-	2.81008	2.34348	-	3.73444	2.82407	-	-	-
down	glucose catabolic process	GO:0006007	-	2.72349	3.14669	-	2.46914	3.72072	-	-	-
down	glucosinolate biosynthetic process	GO:0019761	-	3.04183	3.50912	-	3.72093	4.04774	-	-	-
down	glucosinolate metabolic process	GO:0019760	-	-	3.36134	-	-	3.87166	-	-	-
down	glycine biosynthetic process from serine	GO:0019264	-	-	-	-	60	-	-	-	-
down	glycine catabolic process	GO:0006546	-	-	3.2316	-	-	3.85986	-	-	-
down	glycine decarboxylation via glycine cleavage system	GO:0019464	-	-	7.45342	-	-	9.01639	-	-	-
down	glycogen biosynthetic process	GO:0005978	-	-	-	-	-	4.32331	-	-	-
down	glycoside biosynthetic process	GO:0016138	-	2.74527	2.79493	-	3.66089	3.2043	-	-	-
down	glycoside metabolic process	GO:0016137	-	-	-	-	-	2.94689	-	-	-
down	granum assembly	GO:0090391	-	17.2414	11.1111	-	-	14.7541	-	-	-
down	Group II intron splicing	GO:0000373	-	-	3.7234	-	-	3.75587	-	-	-
down	guanosine tetraphosphate metabolic process	GO:0015969	-	-	7.03125	-	-	8.33333	-	-	-
down	guanosine-containing compound catabolic process	GO:1901069	-	-	1.99511	-	-	-	-	-	-
down	heterocycle biosynthetic process	GO:0018130	-	1.0666	-	-	-	1.07878	-	-	-
down	indoleacetic acid biosynthetic process	GO:0009684	-	-	2.04908	-	2.8	2.04218	-	-	-
down	inorganic diphosphate transport	GO:0030505	-	15.2174	7.8125	-	-	10.4167	-	-	-
down	intracellular distribution of mitochondria	GO:0048312	-	-	7.92079	-	-	-	-	-	-
down	iron-sulfur cluster assembly	GO:0016226	-	3.35986	3.79706	-	-	4.2652	-	-	-
down	isopentenyl diphosphate biosynthetic process, methylerythritol 4-phosphate pathway	GO:0019288	-	5.88235	6.27514	-	4.07125	7.00596	-	-	-
down	jasmonic acid biosynthetic process	GO:0009695	-	-	1.72708	-	-	2.05978	-	-	-
down	jasmonic acid mediated signaling pathway	GO:0009867	-	-	1.63064	-	-	1.83769	-	-	-
down	leaf morphogenesis	GO:0009965	-	2.86815	3.32303	-	-	3.60065	-	-	-
down	light-independent chlorophyll biosynthetic process	GO:0036068	-	-	-	-	60	-	-	-	-
down	lipoate metabolic process	GO:0009106	-	3.25521	2.81955	-	-	3.42253	-	-	-
down	maltose metabolic process	GO:0000023	-	3.7674	5.79367	-	-	6.96401	-	-	-
down	MAPK cascade	GO:0000165	-	-	1.5844	-	-	1.45181	-	-	-
down	medium-chain fatty acid catabolic process	GO:0051793	-	-	-	-	60	-	-	-	-
down	melatonin biosynthetic process	GO:0030187	-	-	11.6667	-	-	-	-	-	-
down	menaquinone biosynthetic process	GO:0009234	-	-	5.22388	-	-	-	-	-	-
down	metabolic process	GO:0008152	-	-	-	-	-	-	-	1.06455	1.0369
down	mRNA modification	GO:0016556	-	1.77638	3.30064	-	-	3.51972	-	-	-
down	multicellular organismal water homeostasis	GO:0050891	-	-	12.766	-	-	17.1429	-	-	-
down	myo-inositol hexakisphosphate biosynthetic process	GO:0010264	-	6.9869	5.20505	-	9.03427	7.09812	-	-	-
down	N-terminal protein amino acid acetylation	GO:0006474	-	-	-	-	-	4.10959	-	-	-
down	N-terminal protein amino acid modification	GO:0031365	-	-	1.38974	-	-	-	-	-	-
down	NADH dehydrogenase complex (plastoquinone) assembly	GO:0010258	-	-	14.8649	-	-	19.6429	-	-	-
down	ncRNA metabolic process	GO:0034660	-	-	2.22468	-	-	2.40382	-	-	-
down	negative regulation of circadian rhythm	GO:0042754	-	-	-	-	60	-	-	-	-
down	negative regulation of defense response	GO:0031348	-	-	1.71778	-	-	1.73459	-	-	-
down	negative regulation of photomorphogenesis	GO:0010100	-	-	5.96026	-	-	6.57895	-	-	-
down	nitric oxide biosynthetic process	GO:0006809	-	21.9512	7.01754	-	27.5862	9.30233	-	-	-
down	nonphotochemical quenching	GO:0010196	-	20	10.7692	-	14.2857	14.2857	-	-	-
down	nucleic acid phosphodiester bond hydrolysis	GO:0090305	-	-	1.15881	-	-	-	-	-	-
down	oxidation-reduction process	GO:0055114	-	1.59314	1.51903	-	1.57012	1.75152	1.98394	1.73015	1.7094
down	oxylipin biosynthetic process	GO:0031408	-	-	-	-	-	2.38379	-	-	-
down	pattern specification process	GO:0007389	-	1.18978	-	-	-	-	-	-	-
down	pentose metabolic process	GO:0019321	-	-	-	-	-	2.13523	-	-	-
down	pentose-phosphate shunt	GO:0006098	-	5.30152	7.03181	-	4.25331	8.70529	-	-	-
down	pentose-phosphate shunt, non-oxidative branch	GO:0009052	-	-	-	-	-	6.57895	-	-	-
down	peripheral nervous system myelin maintenance	GO:0032287	100	-	-	-	-	-	-	-	-
down	phosphatidylglycerol biosynthetic process	GO:0006655	-	3.46154	4.07219	-	-	4.28659	-	-	-
down	phosphatidylglycerol metabolic process	GO:0046471	-	-	-	-	3.26087	-	-	-	-
down	phosphatidylinositol dephosphorylation	GO:0046856	-	-	3.78251	-	-	-	-	-	-
down	photoinhibition	GO:0010205	-	-	5.33708	-	-	7.80669	-	-	-
down	photorespiration	GO:0009853	-	-	2.45112	-	-	3.02588	-	-	-
down	photosynthesis	GO:0015979	-	5.06818	6.10436	-	6.06355	7.06917	-	-	-
down	photosynthesis, light harvesting	GO:0009765	-	16	10.1174	-	26.0714	11.9474	-	-	-
down	photosynthesis, light harvesting in photosystem I	GO:0009768	-	18.8235	14.4681	-	38.9831	17.5141	-	-	-
down	photosynthesis, light reaction	GO:0019684	-	5.93075	7.12783	-	7.19178	8.25553	-	-	-
down	photosynthetic acclimation	GO:0009643	-	-	5.52486	-	-	-	-	-	-
down	photosynthetic electron transport chain	GO:0009767	-	-	6.85259	-	-	7.90722	-	-	-
down	photosynthetic electron transport in photosystem I	GO:0009773	-	5.98802	12.419	-	-	14.2857	-	-	-
down	photosynthetic electron transport in photosystem II	GO:0009772	-	-	3.82409	-	-	-	-	-	-
down	photosystem I assembly	GO:0048564	-	-	9.45946	-	-	13.3929	-	-	-
down	photosystem I stabilization	GO:0042550	-	-	-	-	-	14.2857	-	-	-
down	photosystem II assembly	GO:0010207	-	5.28757	9.90961	-	4.89418	11.3425	-	-	-
down	photosystem II oxygen evolving complex assembly	GO:0010270	-	-	10.5263	-	-	-	-	-	-
down	photosystem II repair	GO:0010206	-	-	9.81818	-	-	12.0192	-	-	-
down	photosystem II stabilization	GO:0042549	-	-	8.20513	-	-	10.2041	-	-	-
down	photosystem stoichiometry adjustment	GO:0080005	-	-	15	-	-	-	-	-	-
down	phylloquinone biosynthetic process	GO:0042372	-	8.51064	4.96183	-	-	-	-	-	-
down	plastid organization	GO:0009657	-	-	5.19739	-	2.61088	6.00442	-	-	-
down	plastid transcription	GO:0042793	-	6.30631	8.65322	-	4.37018	9.21619	-	-	-
down	plastid translation	GO:0032544	-	14.1304	12.9412	-	-	15.544	-	-	-
down	plastoquinone biosynthetic process	GO:0010236	-	10.6667	9.13462	-	-	10.828	-	-	-
down	polycistronic mRNA processing	GO:0031426	-	-	5.52486	-	-	-	-	-	-
down	positive regulation of catalytic activity	GO:0043085	-	-	1.83857	-	-	2.25936	-	-	-
down	positive regulation of telomerase activity	GO:0051973	-	15.3846	-	-	25.9259	-	-	-	-
down	positive regulation of transcription, DNA-templated	GO:0045893	-	1.56823	1.76729	-	-	1.79972	-	-	-
down	post-embryonic animal morphogenesis	GO:0009886	-	-	1.29158	-	-	1.19377	-	-	-
down	potassium ion import across plasma membrane	GO:1990573	-	-	3.90071	-	-	4.22535	-	-	-
down	protein autophosphorylation	GO:0046777	-	-	1.68404	-	-	-	-	-	-
down	protein import into chloroplast thylakoid membrane	GO:0045038	-	-	11.9403	-	-	13.1579	-	-	-
down	protein peptidyl-prolyl isomerization	GO:0000413	-	-	2.64624	-	-	2.94931	-	-	-
down	protein phosphorylation	GO:0006468	-	-	1.23382	-	-	-	-	-	-
down	protein targeting to chloroplast	GO:0045036	-	7.37463	5.48164	-	6.31579	6.12676	-	-	-
down	protein targeting to membrane	GO:0006612	-	-	1.79531	-	-	1.8697	-	-	-
down	protein-chromophore linkage	GO:0018298	-	13.5255	7.29167	-	23.1013	7.8473	-	-	-
down	protoporphyrinogen IX biosynthetic process	GO:0006782	-	7.58621	-	-	9.80392	-	-	-	-
down	PSII associated light-harvesting complex II catabolic process	GO:0010304	-	4.49102	5.93952	-	-	6.28571	-	-	-
down	pyridoxal biosynthetic process	GO:0042821	-	-	11.6667	-	-	15.2174	-	-	-
down	red light signaling pathway	GO:0010161	-	-	4.69613	-	-	-	-	-	-
down	red, far-red light phototransduction	GO:0009585	-	-	-	-	-	2.68318	-	-	-
down	reductive pentose-phosphate cycle	GO:0019253	-	7.64706	11.2766	-	-	14.0845	-	-	-
down	regulation of anthocyanin biosynthetic process	GO:0031540	-	6.14035	-	-	-	-	-	-	-
down	regulation of hair cycle	GO:0042634	100	-	-	-	-	-	-	-	-
down	regulation of hydrogen peroxide metabolic process	GO:0010310	-	-	2.43659	-	-	2.53767	-	-	-
down	regulation of interspecies interactions between organisms	GO:0043903	-	-	3.18258	-	-	-	-	-	-
down	regulation of ion transmembrane transport	GO:0034765	-	-	2.37963	-	-	2.5087	-	-	-
down	regulation of isopentenyl diphosphate biosynthetic process, methylerythritol 4-phosphate pathway	GO:0010322	-	29.1667	13.4328	-	35.2941	17.6471	-	-	-
down	regulation of lipid metabolic process	GO:0019216	-	-	-	-	-	2.59973	-	-	-
down	regulation of multi-organism process	GO:0043900	-	-	1.92474	-	-	2.14654	-	-	-
down	regulation of phenylpropanoid metabolic process	GO:2000762	-	2.27187	-	-	-	-	-	-	-
down	regulation of photosynthesis	GO:0010109	-	-	6.78314	-	-	-	-	-	-
down	regulation of plant-type hypersensitive response	GO:0010363	-	-	1.68993	-	-	1.75736	-	-	-
down	regulation of potassium ion transport	GO:0043266	-	-	5.74413	-	-	5.53633	-	-	-
down	regulation of protein dephosphorylation	GO:0035304	-	2.86396	5.2828	-	3.29171	5.81307	-	-	-
down	regulation of proton transport	GO:0010155	-	3.10391	4.86855	-	4.61538	6.12113	-	-	-
down	response to blue light	GO:0009637	-	3.91459	4.93193	-	5.27919	5.84835	-	-	-
down	response to cadmium ion	GO:0046686	-	1.60166	1.36524	-	-	1.45266	-	-	-
down	response to cold	GO:0009409	-	1.88028	1.62527	-	2.06204	1.99218	-	-	-
down	response to cytokinin	GO:0009735	-	-	2.04188	-	-	2.10719	-	-	-
down	response to far red light	GO:0010218	-	4.3609	4.64043	-	5.25751	5.81897	-	-	-
down	response to gravity	GO:0009629	-	1.08634	-	-	-	-	-	-	-
down	response to high light intensity	GO:0009644	-	-	1.79438	-	-	2.29706	-	-	-
down	response to iron ion	GO:0010039	-	-	2.20014	-	-	-	-	-	-
down	response to jasmonic acid	GO:0009753	-	1.93976	-	-	2.0252	1.87627	-	-	-
down	response to karrikin	GO:0080167	-	2.45455	1.7066	-	-	2.07036	-	-	-
down	response to light stimulus	GO:0009416	-	2.18818	1.85139	-	2.29291	2.16937	-	-	-
down	response to mannitol	GO:0010555	-	-	5.04587	-	-	4.84848	-	-	-
down	response to nematode	GO:0009624	-	-	1.63303	-	-	-	-	-	-
down	response to nitrate	GO:0010167	-	-	-	-	2.27062	-	-	-	-
down	response to nutrient	GO:0007584	-	-	2.19355	-	-	-	-	-	-
down	response to photooxidative stress	GO:0080183	-	22.7273	-	-	-	13.0435	-	-	-
down	response to reactive oxygen species	GO:0000302	-	1.7538	1.42306	-	-	1.53232	-	-	-
down	response to red light	GO:0010114	-	4.96296	5.05618	-	5.81395	5.98442	-	-	-
down	response to red or far red light	GO:0009639	-	2.70636	2.36583	-	3.47586	2.79882	-	-	-
down	response to salt stress	GO:0009651	-	-	-	-	1.42746	-	-	-	-
down	response to sucrose	GO:0009744	-	2.37219	2.22977	-	-	2.87278	-	-	-
down	response to symbiotic fungus	GO:0009610	-	-	-	-	4.70219	-	-	-	-
down	response to UV-B	GO:0010224	4.03023	3.55556	1.94506	-	-	2.52123	-	-	-
down	response to wounding	GO:0009611	-	1.55642	-	-	-	-	-	-	-
down	RNA folding	GO:0034337	-	-	12.766	-	-	17.1429	-	-	-
down	rRNA processing	GO:0006364	-	2.67987	3.54364	-	-	4.17537	-	-	-
down	salicylic acid biosynthetic process	GO:0009697	-	-	2.07612	-	-	2.23599	-	-	-
down	sebaceous gland cell differentiation	GO:0001949	100	-	-	-	-	-	-	-	-
down	siderophore biosynthetic process	GO:0019290	-	-	-	-	-	-	-	5.11628	-
down	small molecule metabolic process	GO:0044281	-	1.5514	1.47797	-	-	1.6492	-	-	-
down	spermine biosynthetic process	GO:0006597	-	13.0435	-	-	-	-	-	-	-
down	stamen morphogenesis	GO:0048448	-	-	-	-	5.24345	-	-	-	-
down	starch biosynthetic process	GO:0019252	-	4.08163	5.48135	-	3.27571	6.73575	-	-	-
down	starch catabolic process	GO:0005983	-	-	-	-	-	4.10959	-	-	-
down	stomatal complex morphogenesis	GO:0010103	-	2.62195	3.16901	-	-	3.34984	-	-	-
down	stomatal movement	GO:0010118	-	2.30392	1.82269	-	2.23776	2.20141	-	-	-
down	strigolactone biosynthetic process	GO:1901601	-	-	6.62983	-	-	6.56934	-	-	-
down	sulfide oxidation, using siroheme sulfite reductase	GO:0019424	-	-	-	-	60	-	-	-	-
down	systemic acquired resistance, salicylic acid mediated signaling pathway	GO:0009862	-	-	1.9818	-	-	2.04002	-	-	-
down	terpenoid biosynthetic process	GO:0016114	-	2.62726	-	-	-	-	-	-	-
down	thylakoid membrane organization	GO:0010027	-	3.45248	5.49934	-	-	5.95885	-	-	-
down	tRNA metabolic process	GO:0006399	-	-	1.10248	-	-	0.90328	-	-	-
down	tryptophan catabolic process	GO:0006569	-	-	2.01858	-	-	-	-	-	-
down	tryptophan transport	GO:0015827	-	-	-	-	16.6667	-	-	-	-
down	unsaturated fatty acid biosynthetic process	GO:0006636	-	4.27273	3.83984	-	4.40986	4.82189	-	-	-
down	uridine biosynthetic process	GO:0046109	-	-	13.3333	-	-	17.3913	-	-	-
down	vitamin E biosynthetic process	GO:0010189	-	-	3.57853	-	-	4.47368	-	-	-
down	vitamin K biosynthetic process	GO:0042371	-	12.069	8.69565	-	-	-	-	-	-
down	vitamin metabolic process	GO:0006766	-	-	2.61005	-	-	2.86156	-	-	-
down	water transport	GO:0006833	-	-	1.85507	-	-	2.04604	-	-	-
down	xanthophyll biosynthetic process	GO:0016123	-	14.6341	9.64912	-	12.069	10.4651	-	-	-
