# Supplementary material for: Identification of Candidate Susceptibility Genes to Puccinia graminis f. sp. tritici in Wheat
Source: Front Plant Sci. 2021 Apr 21;12:657796. doi: 10.3389/fpls.2021.657796 (PMC8097158; doi:10.3389/fpls.2021.657796)
Supplement: Supplementary file 3 [file Table_3.XLSX]

## Sheet: S genes 
Table S3. List of candidate susceptibility genes and orthogroups.
Name_from_paper	Organism	Gene_ID_NCBI	Qualifying_orthogroup?	Orthogroup_number
VAD1	Arabidopsis	AT1G02120	Y	OG0010224
BON3	Arabidopsis	AT1G08860	Y	OG0004489
AtNFXL1	Arabidopsis	AT1G10170	Y	OG0007192
MPK1	Arabidopsis	AT1G10210	Y	OG0002114
MLO2	Arabidopsis	AT1G11310	Y	OG0001703
AtWRKY4	Arabidopsis	AT1G13960	Y	OG0006371
PFT1	Arabidopsis	AT1G25540	Y	OG0009045
CAD1	Arabidopsis	AT1G29690	Y	OG0004521
MPK2	Arabidopsis	AT1G59580	Y	OG0002114
MLO6	Arabidopsis	AT1G61560	Y	OG0001703
ETR1	Arabidopsis	AT1G66340	Y	OG0001127
PTP1	Arabidopsis	AT1G71860	Y	OG0001979
PSY1R	Arabidopsis	AT1G72300	Y	OG0000016
BZR1	Arabidopsis	AT1G75080	Y	OG0004345
WAT1	Arabidopsis	AT1G75500	Y	OG0004057
AtWRKY40	Arabidopsis	AT1G80840	Y	OG0000454
PUX2	Arabidopsis	AT2G01650	Y	OG0013979
PSKR1	Arabidopsis	AT2G02220	Y	OG0009671
DMR1	Arabidopsis	AT2G17265	Y	OG0004645
AHA1	Arabidopsis	AT2G18960	Y	OG0000100
SR1	Arabidopsis	AT2G22300	Y	OG0003495
AtWRKY17	Arabidopsis	AT2G24570	Y	OG0002599
AtWRKY60	Arabidopsis	AT2G25000	Y	OG0000454
EIL1	Arabidopsis	AT2G27050	Y	OG0007228
AtWRKY25	Arabidopsis	AT2G30250	Y	OG0006441
ACD11	Arabidopsis	AT2G34690	Y	OG0015115
FAH1	Arabidopsis	AT2G34770	Y	OG0006155
PUB23	Arabidopsis	AT2G35930	Y	OG0000759
MLO12	Arabidopsis	AT2G39200	Y	OG0001703
BIK1	Arabidopsis	AT2G39660	Y	OG0000269
AtPLDbeta1	Arabidopsis	AT2G42010	Y	OG0001209
KMD3	Arabidopsis	AT2G44130	Y	OG0001606
DHDPS2	Arabidopsis	AT2G45440	Y	OG0004169
IBR3	Arabidopsis	AT3G06810	Y	OG0007221
PUB24	Arabidopsis	AT3G11840	Y	OG0000759
AtUBP13	Arabidopsis	AT3G11910	Y	OG0000848
PME3	Arabidopsis	AT3G14310	Y	OG0002320
EIN3	Arabidopsis	AT3G20770	Y	OG0007228
RIN4	Arabidopsis	AT3G25070	Y	OG0011021
FER	Arabidopsis	AT3G51550	Y	OG0004290
PUB22	Arabidopsis	AT3G52450	Y	OG0000759
PMR6	Arabidopsis	AT3G54920	Y	OG0000533
EDR3	Arabidopsis	AT3G60190	Y	OG0000538
AtLFG2	Arabidopsis	AT3G63310	Y	OG0000488
MPK4	Arabidopsis	AT4G01370	Y	OG0001862
PMR4	Arabidopsis	AT4G03550	Y	OG0001050
S3H	Arabidopsis	AT4G10500	Y	OG0009499
SNI1	Arabidopsis	AT4G18470	Y	OG0012212
CESA8	Arabidopsis	AT4G18780	Y	OG0000109
EDR2	Arabidopsis	AT4G19040	Y	OG0002731
LSD1	Arabidopsis	AT4G20380	Y	OG0007723
bHLH27	Arabidopsis	AT4G29930	Y	OG0005164
AHA2	Arabidopsis	AT4G30190	Y	OG0000100
AtWRKY11	Arabidopsis	AT4G31550	Y	OG0002599
AtWRKY18	Arabidopsis	AT4G31800	Y	OG0000454
AGD2	Arabidopsis	AT4G33680	Y	OG0005265
AtROP6	Arabidopsis	AT4G35020	Y	OG0000209
SRFR1	Arabidopsis	AT4G37460	Y	OG0010945
bHLH25	Arabidopsis	AT4G37850	Y	OG0004217
EIN2	Arabidopsis	AT5G03280	Y	OG0002482
CESA3(cev1)	Arabidopsis	AT5G05170	Y	OG0000109
AtUBP12	Arabidopsis	AT5G06600	Y	OG0000848
BON2	Arabidopsis	AT5G07300	Y	OG0007999
AtSRT2	Arabidopsis	AT5G09230	Y	OG0009278
MYB3R4	Arabidopsis	AT5G11510	Y	OG0002243
RSP1/AK2	Arabidopsis	AT5G14060	Y	OG0002151
DND1	Arabidopsis	AT5G15410	Y	OG0018857
CESA7	Arabidopsis	AT5G17420	Y	OG0000109
SSI1	Arabidopsis	AT5G24300	Y	OG0018876
DMR6	Arabidopsis	AT5G24530	Y	OG0010403
CESA4	Arabidopsis	AT5G44030	Y	OG0000109
AtWRKY8	Arabidopsis	AT5G46350	Y	OG0001241
BIR1	Arabidopsis	AT5G48380	Y	OG0011159
AtWRKY48	Arabidopsis	AT5G49520	Y	OG0001241
RAR1	Arabidopsis	AT5G51700	Y	OG0012407
AtWRKY27	Arabidopsis	AT5G52830	Y	OG0004309
DND2	Arabidopsis	AT5G54250	Y	OG0004427
AtAGD5	Arabidopsis	AT5G54310	Y	OG0015434
EIR1	Arabidopsis	AT5G57090	Y	OG0010712
PMR5	Arabidopsis	AT5G58600	Y	OG0006850
SIZ1	Arabidopsis	AT5G60410	Y	OG0007262
BON1	Arabidopsis	AT5G61900	Y	OG0007999
CPR5	Arabidopsis	AT5G64930	Y	OG0002969
HvROP6	Barley	HORVU1Hr1G076880	Y	OG0000209
RIC171	Barley	HORVU2Hr1G107040	Y	OG0014411
ADH	Barley	HORVU4Hr1G016770	Y	OG0001989
HvMLO	Barley	HORVU4Hr1G082710	Y	OG0001703
BI-1	Barley	HORVU6Hr1G014450	Y	OG0005821
HvWRKY1	Barley	HORVU6Hr1G028790	Y	OG0000454
HvRAC3	Barley	HORVU6Hr1G076210	Y	OG0000209
TaMLO	Wheat	TraesCS5A02G494800	Y	OG0001703
IOS1	Arabidopsis	AT1G51800	N
AtNUDT6	Arabidopsis	AT2G04450	N
SON1	Arabidopsis	AT2G17310	N
AtMLO7(NTA)	Arabidopsis	AT2G17430	N
AtWRKY33	Arabidopsis	AT2G38470	N
BAP2	Arabidopsis	AT2G45760	N
CPR22	Arabidopsis	AT2G46450	N
AtWRKY23	Arabidopsis	AT2G47260	N
AtWRKY58	Arabidopsis	AT3G01080	N
UGT76B1	Arabidopsis	AT3G11340	N
LecRK-V.5	Arabidopsis	AT3G59700	N
BAP1	Arabidopsis	AT3G61190	N
CPR1	Arabidopsis	AT4G12560	N
CPRI30	Arabidopsis	AT4G12560	N
AtNUDT7	Arabidopsis	AT4G12720	N
AtLFG1	Arabidopsis	AT4G14730	N
FAH2	Arabidopsis	AT4G20870	N
AtWRKY7	Arabidopsis	AT4G24240	N
AtWRKY62	Arabidopsis	AT5G01900	N
AtWRKY38	Arabidopsis	AT5G22570	N
HvRACB	Barley	HORVU6Hr1G012690	N

## Sheet: Orthogroups
Table S3. Wheat and Brachypodium distachyon orthologs associated with susceptibility genes from Arabidopsis
thaliana and Hordeum vulgare.
S_gene	Plant Species	Gene_ID	Orthogroup	Wheat ortholog	Brachypodium ortholog
PSY1R	Arabidopsis	AT1G72300	OG0000016	TraesCS6A02G124300	BdiBd21-3.1G0451900
				TraesCS6A02G124500	BdiBd21-3.3G0053500
				TraesCS6A02G124600	BdiBd21-3.3G0053600
				TraesCS6A02G124700	BdiBd21-3.3G0053700
				TraesCS6A02G124800	BdiBd21-3.3G0053800
				TraesCS6A02G124900	BdiBd21-3.3G0054200
				TraesCS6A02G125000	BdiBd21-3.3G0054400
				TraesCS6A02G125200	BdiBd21-3.3G0055700
				TraesCS6A02G125300
				TraesCS6A02G125400
				TraesCS6A02G125500
				TraesCS6A02G125600
				TraesCS6A02G126400
				TraesCS6A02G127500
				TraesCS6A02G130000
				TraesCS6B02G152300
				TraesCS6B02G152700
				TraesCS6B02G152800
				TraesCS6B02G152900
				TraesCS6B02G153100
				TraesCS6B02G153300
				TraesCS6B02G153400
				TraesCS6B02G153500
				TraesCS6B02G153700
				TraesCS6B02G154300
				TraesCS6B02G158400
				TraesCS6D02G114800
				TraesCS6D02G115100
				TraesCS6D02G115200
				TraesCS6D02G115300
				TraesCS6D02G115400
				TraesCS6D02G115700
				TraesCS6D02G115800
				TraesCS6D02G115900
				TraesCS6D02G116000
				TraesCS6D02G116100
				TraesCS6D02G116500
				TraesCS6D02G116700
				TraesCS6D02G116800
				TraesCS7A02G408300
				TraesCS7A02G435300
				TraesCS7A02G452500
				TraesCS7B02G335000
				TraesCS7D02G401700
				TraesCS7D02G425500
				TraesCS7D02G425600
				TraesCS7D02G426000
				TraesCS7D02G441600
AHA1	Arabidopsis	AT2G18960	OG0000100	TraesCS1B02G268800	BdiBd21-3.1G0161700
				TraesCS1D02G257600	BdiBd21-3.1G0626100
				TraesCS2B02G530500	BdiBd21-3.1G0729200
				TraesCS2D02G503000	BdiBd21-3.1G0973100
				TraesCS4B02G300000	BdiBd21-3.1G1047600
				TraesCS4D02G027900	BdiBd21-3.3G0261100
				TraesCS5A02G004200	BdiBd21-3.3G0716500
				TraesCS5A02G543300	BdiBd21-3.4G0004600
				TraesCS5D02G013100	BdiBd21-3.5G0324400
				TraesCS6D02G344000
				TraesCS7A02G145400
				TraesCS7B02G047600
				TraesCS7D02G146700
				TraesCS7D02G500200
AHA2	Arabidopsis	AT4G30190	OG0000100	TraesCS1B02G268800	BdiBd21-3.1G0161700
				TraesCS1D02G257600	BdiBd21-3.1G0626100
				TraesCS2B02G530500	BdiBd21-3.1G0729200
				TraesCS2D02G503000	BdiBd21-3.1G0973100
				TraesCS4B02G300000	BdiBd21-3.1G1047600
				TraesCS4D02G027900	BdiBd21-3.3G0261100
				TraesCS5A02G004200	BdiBd21-3.3G0716500
				TraesCS5A02G543300	BdiBd21-3.4G0004600
				TraesCS5D02G013100	BdiBd21-3.5G0324400
				TraesCS6D02G344000
				TraesCS7A02G145400
				TraesCS7B02G047600
				TraesCS7D02G146700
				TraesCS7D02G500200
CESA8	Arabidopsis	AT4G18780	OG0000109	TraesCS1A02G149300	BdiBd21-3.1G0033500
				TraesCS1B02G136200	BdiBd21-3.1G0060500
				TraesCS1B02G167200	BdiBd21-3.1G0385900
				TraesCS2A02G102600	BdiBd21-3.1G0707000
				TraesCS3B02G324500	BdiBd21-3.1G0720500
				TraesCS4A02G355000	BdiBd21-3.2G0426100
				TraesCS5B02G221600	BdiBd21-3.2G0638500
				TraesCS5B02G517500	BdiBd21-3.3G0369400
				TraesCS5D02G230300	BdiBd21-3.4G0429400
				TraesCS5D02G470400
				TraesCS5D02G517200
				TraesCS6A02G077800
				TraesCS6B02G104600
				TraesCSU02G142500
CESA3(cev1)	Arabidopsis	AT5G05170	OG0000109	TraesCS1A02G149300	BdiBd21-3.1G0033500
				TraesCS1B02G136200	BdiBd21-3.1G0060500
				TraesCS1B02G167200	BdiBd21-3.1G0385900
				TraesCS2A02G102600	BdiBd21-3.1G0707000
				TraesCS3B02G324500	BdiBd21-3.1G0720500
				TraesCS4A02G355000	BdiBd21-3.2G0426100
				TraesCS5B02G221600	BdiBd21-3.2G0638500
				TraesCS5B02G517500	BdiBd21-3.3G0369400
				TraesCS5D02G230300	BdiBd21-3.4G0429400
				TraesCS5D02G470400
				TraesCS5D02G517200
				TraesCS6A02G077800
				TraesCS6B02G104600
				TraesCSU02G142500
CESA7	Arabidopsis	AT5G17420	OG0000109	TraesCS1A02G149300	BdiBd21-3.1G0033500
				TraesCS1B02G136200	BdiBd21-3.1G0060500
				TraesCS1B02G167200	BdiBd21-3.1G0385900
				TraesCS2A02G102600	BdiBd21-3.1G0707000
				TraesCS3B02G324500	BdiBd21-3.1G0720500
				TraesCS4A02G355000	BdiBd21-3.2G0426100
				TraesCS5B02G221600	BdiBd21-3.2G0638500
				TraesCS5B02G517500	BdiBd21-3.3G0369400
				TraesCS5D02G230300	BdiBd21-3.4G0429400
				TraesCS5D02G470400
				TraesCS5D02G517200
				TraesCS6A02G077800
				TraesCS6B02G104600
				TraesCSU02G142500
CESA4	Arabidopsis	AT5G44030	OG0000109	TraesCS1A02G149300	BdiBd21-3.1G0033500
				TraesCS1B02G136200	BdiBd21-3.1G0060500
				TraesCS1B02G167200	BdiBd21-3.1G0385900
				TraesCS2A02G102600	BdiBd21-3.1G0707000
				TraesCS3B02G324500	BdiBd21-3.1G0720500
				TraesCS4A02G355000	BdiBd21-3.2G0426100
				TraesCS5B02G221600	BdiBd21-3.2G0638500
				TraesCS5B02G517500	BdiBd21-3.3G0369400
				TraesCS5D02G230300	BdiBd21-3.4G0429400
				TraesCS5D02G470400
				TraesCS5D02G517200
				TraesCS6A02G077800
				TraesCS6B02G104600
				TraesCSU02G142500
AtROP6	Arabidopsis	AT4G35020	OG0000209	TraesCS1A02G323900	BdiBd21-3.2G0263400
				TraesCS1A02G333600	BdiBd21-3.3G0022600
				TraesCS1B02G337200	BdiBd21-3.3G0158700
				TraesCS1B02G347000	BdiBd21-3.3G0784000
				TraesCS1D02G325200	BdiBd21-3.3G0802000
				TraesCS1D02G336200
				TraesCS6A02G070700
				TraesCS6B02G094700
				TraesCS6D02G068500
				TraesCS6D02G288300
				TraesCS7A02G191400
				TraesCS7B02G096200
HvROP6	Barley	HORVU1Hr1G076880	OG0000209	TraesCS1A02G323900	BdiBd21-3.2G0263400
				TraesCS1A02G333600	BdiBd21-3.3G0022600
				TraesCS1B02G337200	BdiBd21-3.3G0158700
				TraesCS1B02G347000	BdiBd21-3.3G0784000
				TraesCS1D02G325200	BdiBd21-3.3G0802000
				TraesCS1D02G336200
				TraesCS6A02G070700
				TraesCS6B02G094700
				TraesCS6D02G068500
				TraesCS6D02G288300
				TraesCS7A02G191400
				TraesCS7B02G096200
HvRAC3	Barley	HORVU6Hr1G076210	OG0000209	TraesCS1A02G323900	BdiBd21-3.2G0263400
				TraesCS1A02G333600	BdiBd21-3.3G0022600
				TraesCS1B02G337200	BdiBd21-3.3G0158700
				TraesCS1B02G347000	BdiBd21-3.3G0784000
				TraesCS1D02G325200	BdiBd21-3.3G0802000
				TraesCS1D02G336200
				TraesCS6A02G070700
				TraesCS6B02G094700
				TraesCS6D02G068500
				TraesCS6D02G288300
				TraesCS7A02G191400
				TraesCS7B02G096200
BIK1	Arabidopsis	AT2G39660	OG0000269	TraesCS1A02G031200	BdiBd21-3.1G0225500
				TraesCS1B02G038800	BdiBd21-3.1G0897900
				TraesCS1D02G032600	BdiBd21-3.2G0497000
				TraesCS2A02G098700	BdiBd21-3.2G0800700
				TraesCS2B02G114900
				TraesCS2D02G098200
				TraesCS3A02G530200
				TraesCS4D02G208400
				TraesCS5B02G239500
AtWRKY40	Arabidopsis	AT1G80840	OG0000454	TraesCS6A02G146900	BdiBd21-3.1G0413500
				TraesCS6B02G175100	BdiBd21-3.3G0078900
				TraesCS6D02G136200
				TraesCS7A02G508700
				TraesCS7A02G508800
				TraesCS7A02G509000
				TraesCS7B02G418400
				TraesCS7B02G418500
				TraesCS7B02G418600
				TraesCS7B02G419400
				TraesCS7D02G497300
				TraesCS7D02G497400
				TraesCS7D02G497700
				TraesCS7D02G497800
AtWRKY60	Arabidopsis	AT2G25000	OG0000454	TraesCS6A02G146900	BdiBd21-3.1G0413500
				TraesCS6B02G175100	BdiBd21-3.3G0078900
				TraesCS6D02G136200
				TraesCS7A02G508700
				TraesCS7A02G508800
				TraesCS7A02G509000
				TraesCS7B02G418400
				TraesCS7B02G418500
				TraesCS7B02G418600
				TraesCS7B02G419400
				TraesCS7D02G497300
				TraesCS7D02G497400
				TraesCS7D02G497700
				TraesCS7D02G497800
AtWRKY18	Arabidopsis	AT4G31800	OG0000454	TraesCS6A02G146900	BdiBd21-3.1G0413500
				TraesCS6B02G175100	BdiBd21-3.3G0078900
				TraesCS6D02G136200
				TraesCS7A02G508700
				TraesCS7A02G508800
				TraesCS7A02G509000
				TraesCS7B02G418400
				TraesCS7B02G418500
				TraesCS7B02G418600
				TraesCS7B02G419400
				TraesCS7D02G497300
				TraesCS7D02G497400
				TraesCS7D02G497700
				TraesCS7D02G497800
HvWRKY1	Barley	HORVU6Hr1G028790	OG0000454	TraesCS6A02G146900	BdiBd21-3.1G0413500
				TraesCS6B02G175100	BdiBd21-3.3G0078900
				TraesCS6D02G136200
				TraesCS7A02G508700
				TraesCS7A02G508800
				TraesCS7A02G509000
				TraesCS7B02G418400
				TraesCS7B02G418500
				TraesCS7B02G418600
				TraesCS7B02G419400
				TraesCS7D02G497300
				TraesCS7D02G497400
				TraesCS7D02G497700
				TraesCS7D02G497800
AtLFG2	Arabidopsis	AT3G63310	OG0000488	TraesCS3B02G525800	BdiBd21-3.1G0072600
				TraesCS3B02G526300	BdiBd21-3.1G0120600
				TraesCS5A02G384100	BdiBd21-3.1G0740500
				TraesCS5A02G437800
				TraesCS5B02G388900
				TraesCS5B02G440600
				TraesCS5D02G393600
				TraesCS5D02G445000
PMR6	Arabidopsis	AT3G54920	OG0000533	TraesCS1B02G161000	BdiBd21-3.5G0012500
				TraesCS2B02G024500
				TraesCS2D02G018000
EDR3	Arabidopsis	AT3G60190	OG0000538	TraesCS1A02G213900	BdiBd21-3.1G0153800
				TraesCS1A02G385400	BdiBd21-3.2G0225300
				TraesCS1B02G227700	BdiBd21-3.3G0443300
				TraesCS1B02G411700
				TraesCS1D02G216700
				TraesCS1D02G393000
				TraesCS4A02G266600
				TraesCS4B02G047700
				TraesCS4D02G047600
PUB23	Arabidopsis	AT2G35930	OG0000759	TraesCS2A02G298000	BdiBd21-3.3G0600100
				TraesCS2B02G314500	BdiBd21-3.5G0119800
				TraesCS2D02G296100
				TraesCS6A02G382300
				TraesCS6A02G382800
				TraesCS6B02G420600
				TraesCS6B02G421400
				TraesCS6B02G421900
				TraesCS6D02G367100
				TraesCS6D02G367600
PUB24	Arabidopsis	AT3G11840	OG0000759	TraesCS2A02G298000	BdiBd21-3.3G0600100
				TraesCS2B02G314500	BdiBd21-3.5G0119800
				TraesCS2D02G296100
				TraesCS6A02G382300
				TraesCS6A02G382800
				TraesCS6B02G420600
				TraesCS6B02G421400
				TraesCS6B02G421900
				TraesCS6D02G367100
				TraesCS6D02G367600
PUB22	Arabidopsis	AT3G52450	OG0000759	TraesCS2A02G298000	BdiBd21-3.3G0600100
				TraesCS2B02G314500	BdiBd21-3.5G0119800
				TraesCS2D02G296100
				TraesCS6A02G382300
				TraesCS6A02G382800
				TraesCS6B02G420600
				TraesCS6B02G421400
				TraesCS6B02G421900
				TraesCS6D02G367100
				TraesCS6D02G367600
AtUBP13	Arabidopsis	AT3G11910	OG0000848	TraesCS2A02G246800	BdiBd21-3.1G0758200
				TraesCS2D02G249100	BdiBd21-3.2G0655900
				TraesCS3A02G295900	BdiBd21-3.4G0097700
				TraesCS3B02G341000	BdiBd21-3.4G0227300
				TraesCS3D02G307100
				TraesCS4D02G165800
				TraesCS5A02G105900
AtUBP12	Arabidopsis	AT5G06600	OG0000848	TraesCS2A02G246800	BdiBd21-3.1G0758200
				TraesCS2D02G249100	BdiBd21-3.2G0655900
				TraesCS3A02G295900	BdiBd21-3.4G0097700
				TraesCS3B02G341000	BdiBd21-3.4G0227300
				TraesCS3D02G307100
				TraesCS4D02G165800
				TraesCS5A02G105900
PMR4	Arabidopsis	AT4G03550	OG0001050	TraesCS2A02G493100	BdiBd21-3.2G0590100
				TraesCS3A02G245500	BdiBd21-3.2G0641600
				TraesCS3B02G274100
				TraesCS3B02G327500
				TraesCS3D02G246000
				TraesCS3D02G292500
ETR1	Arabidopsis	AT1G66340	OG0001127	TraesCS1A02G096600	BdiBd21-3.1G0154300
				TraesCS1D02G105600	BdiBd21-3.2G0438200
				TraesCS4A02G274300	BdiBd21-3.4G0000200
				TraesCS4B02G039300
				TraesCS4D02G036400
				TraesCS5A02G002600
				TraesCS5B02G001600
AtPLDbeta1	Arabidopsis	AT2G42010	OG0001209	TraesCS1A02G365100	BdiBd21-3.1G1029700
				TraesCS1B02G195200	BdiBd21-3.3G0412900
				TraesCS1D02G189300	BdiBd21-3.3G0413000
				TraesCS5A02G520900
AtWRKY8	Arabidopsis	AT5G46350	OG0001241	TraesCS1A02G348600	BdiBd21-3.2G0250600
				TraesCS1B02G363200	BdiBd21-3.2G0626800
				TraesCS1D02G351600
				TraesCS3A02G280400
				TraesCS3D02G280200
AtWRKY48	Arabidopsis	AT5G49520	OG0001241	TraesCS1A02G348600	BdiBd21-3.2G0250600
				TraesCS1B02G363200	BdiBd21-3.2G0626800
				TraesCS1D02G351600
				TraesCS3A02G280400
				TraesCS3D02G280200
KMD3	Arabidopsis	AT2G44130	OG0001606	TraesCS4A02G228600	BdiBd21-3.3G0612100
				TraesCS4A02G228800	BdiBd21-3.4G0290300
				TraesCS4B02G087600	BdiBd21-3.4G0290600
				TraesCS4B02G087800
				TraesCS4D02G084900
				TraesCS4D02G085000
MLO2	Arabidopsis	AT1G11310	OG0001703	TraesCS4B02G322100	BdiBd21-3.1G1020700
				TraesCS4B02G322700
				TraesCS4D02G318600
				TraesCS4D02G318700
				TraesCS4D02G319100
				TraesCS5A02G489900
				TraesCS5A02G494800
MLO6	Arabidopsis	AT1G61560	OG0001703	TraesCS4B02G322100	BdiBd21-3.1G1020700
				TraesCS4B02G322700
				TraesCS4D02G318600
				TraesCS4D02G318700
				TraesCS4D02G319100
				TraesCS5A02G489900
				TraesCS5A02G494800
MLO12	Arabidopsis	AT2G39200	OG0001703	TraesCS4B02G322100	BdiBd21-3.1G1020700
				TraesCS4B02G322700
				TraesCS4D02G318600
				TraesCS4D02G318700
				TraesCS4D02G319100
				TraesCS5A02G489900
				TraesCS5A02G494800
HvMLO	Barley	HORVU4Hr1G082710	OG0001703	TraesCS4B02G322100	BdiBd21-3.1G1020700
				TraesCS4B02G322700
				TraesCS4D02G318600
				TraesCS4D02G318700
				TraesCS4D02G319100
				TraesCS5A02G489900
				TraesCS5A02G494800
TaMLO	Wheat	TraesCS5A02G494800	OG0001703	TraesCS4B02G322100	BdiBd21-3.1G1020700
				TraesCS4B02G322700
				TraesCS4D02G318600
				TraesCS4D02G318700
				TraesCS4D02G319100
				TraesCS5A02G489900
				TraesCS5A02G494800
MPK4	Arabidopsis	AT4G01370	OG0001862	TraesCS1A02G184500	BdiBd21-3.3G0222500
				TraesCS7A02G299300	BdiBd21-3.3G0417100
				TraesCS7B02G201000
				TraesCS7D02G295900
PTP1	Arabidopsis	AT1G71860	OG0001979	TraesCS2A02G208000	BdiBd21-3.4G0337332
				TraesCS2B02G234600	BdiBd21-3.4G0337600
				TraesCS2D02G214800	BdiBd21-3.4G0573600
				TraesCS4A02G217600
				TraesCS4B02G096200
				TraesCS4D02G092700
ADH	Barley	HORVU4Hr1G016770	OG0001989	TraesCS4A02G202100	BdiBd21-3.4G0315600
				TraesCS4A02G202300	BdiBd21-3.4G0315800
				TraesCS4B02G106300	BdiBd21-3.4G0315900
				TraesCS4D02G103000	BdiBd21-3.F0000400
					BdiBd21-3.F0000500
MPK1	Arabidopsis	AT1G10210	OG0002114	TraesCS6B02G146300	BdiBd21-3.1G0459300
				TraesCS7D02G414700	BdiBd21-3.3G0047400
MPK2	Arabidopsis	AT1G59580	OG0002114	TraesCS6B02G146300	BdiBd21-3.1G0459300
				TraesCS7D02G414700	BdiBd21-3.3G0047400
RSP1/AK2	Arabidopsis	AT5G14060	OG0002151	TraesCS3B02G475900	BdiBd21-3.1G0022800
				TraesCS3D02G434800	BdiBd21-3.2G0761900
				TraesCS4A02G337800
				TraesCS7B02G461700
MYB3R4	Arabidopsis	AT5G11510	OG0002243	TraesCS1A02G129300	BdiBd21-3.2G0100400
				TraesCS1B02G147800	BdiBd21-3.2G0402400
				TraesCS1D02G125400
				TraesCS3A02G153700
				TraesCS3B02G180300
				TraesCS3D02G161100
PME3	Arabidopsis	AT3G14310	OG0002320	TraesCS2A02G109600	BdiBd21-3.2G0158400
				TraesCS2B02G127600
				TraesCS2D02G109800
				TraesCS5A02G043800
				TraesCS5B02G048000
				TraesCS5D02G053200
EIN2	Arabidopsis	AT5G03280	OG0002482	TraesCS2B02G133000	BdiBd21-3.1G0155500
				TraesCS4A02G275600	BdiBd21-3.4G0115100
				TraesCS4B02G038100
				TraesCS4D02G036000
				TraesCS5A02G161200
				TraesCS5B02G158500
				TraesCS5D02G166000
AtWRKY17	Arabidopsis	AT2G24570	OG0002599	TraesCS2A02G270200	BdiBd21-3.3G0257300
				TraesCS2A02G433000	BdiBd21-3.5G0064300
				TraesCS2B02G289000	BdiBd21-3.5G0271500
				TraesCS2B02G454300
				TraesCS2D02G269200
				TraesCS2D02G431000
AtWRKY11	Arabidopsis	AT4G31550	OG0002599	TraesCS2A02G270200	BdiBd21-3.3G0257300
				TraesCS2A02G433000	BdiBd21-3.5G0064300
				TraesCS2B02G289000	BdiBd21-3.5G0271500
				TraesCS2B02G454300
				TraesCS2D02G269200
				TraesCS2D02G431000
EDR2	Arabidopsis	AT4G19040	OG0002731	TraesCS4A02G437200	BdiBd21-3.1G0671600
				TraesCS6A02G005000	BdiBd21-3.3G0004300
				TraesCS7D02G523200	BdiBd21-3.3G0361000
CPR5	Arabidopsis	AT5G64930	OG0002969	TraesCS3A02G424900	BdiBd21-3.2G0753600
				TraesCS3B02G461200	BdiBd21-3.3G0763900
				TraesCS3D02G419800
				TraesCS6A02G326900
				TraesCS6B02G358000
				TraesCS6D02G306700
SR1	Arabidopsis	AT2G22300	OG0003495	TraesCS4A02G407100	BdiBd21-3.1G0966300
				TraesCS4B02G306300	BdiBd21-3.3G0324900
				TraesCS4D02G304500
				TraesCS5B02G521100
WAT1	Arabidopsis	AT1G75500	OG0004057	TraesCS3A02G007100	BdiBd21-3.4G0293700
				TraesCS3B02G006900
				TraesCS3B02G011600
				TraesCS3D02G003600
				TraesCS7D02G280200
DHDPS2	Arabidopsis	AT2G45440	OG0004169	TraesCS2A02G511900	BdiBd21-3.2G0203200
				TraesCS2D02G395600	BdiBd21-3.5G0248700
bHLH25	Arabidopsis	AT4G37850	OG0004217	TraesCS4A02G257900	BdiBd21-3.1G0137000
				TraesCS4B02G056600
				TraesCS4D02G056900
FER	Arabidopsis	AT3G51550	OG0004290	TraesCS1B02G241400	BdiBd21-3.1G0854800
				TraesCS1D02G228900
				TraesCS4A02G133800
				TraesCS4B02G171100
				TraesCS4D02G173100
AtWRKY27	Arabidopsis	AT5G52830	OG0004309	TraesCS7A02G343000	BdiBd21-3.1G0532500
				TraesCS7B02G240000	BdiBd21-3.3G0133400
				TraesCS7D02G336400
BZR1	Arabidopsis	AT1G75080	OG0004345	TraesCS2A02G187800	BdiBd21-3.1G0307900
				TraesCS2B02G219300
				TraesCS2D02G199900
DND2	Arabidopsis	AT5G54250	OG0004427	TraesCS1A02G321700	BdiBd21-3.2G0271500
				TraesCS1B02G334100	BdiBd21-3.2G0663400
				TraesCS1D02G322000
				TraesCS3B02G350500
				TraesCS3D02G315000
BON3	Arabidopsis	AT1G08860	OG0004489	TraesCS1A02G236100	BdiBd21-3.2G0366300
				TraesCS1B02G247700
				TraesCS1D02G236200
				TraesCS6B02G074300
				TraesCS6D02G057900
CAD1	Arabidopsis	AT1G29690	OG0004521	TraesCS3A02G272500	BdiBd21-3.2G0637100
				TraesCS3B02G306200
				TraesCS3D02G272100
				TraesCS4A02G194500
				TraesCS4B02G120800
				TraesCS4D02G118800
DMR1	Arabidopsis	AT2G17265	OG0004645	TraesCS2A02G471500	BdiBd21-3.3G0799800
				TraesCS2B02G494300
				TraesCS2D02G471400
				TraesCS6A02G421100
				TraesCS6B02G467000
				TraesCS6D02G404500
bHLH27	Arabidopsis	AT4G29930	OG0005164	TraesCS2A02G271700	BdiBd21-3.5G0066700
				TraesCS2B02G289900
				TraesCS2D02G270300
AGD2	Arabidopsis	AT4G33680	OG0005265	TraesCS4A02G116000	BdiBd21-3.1G0280300
				TraesCS4D02G189600	BdiBd21-3.1G0628300
				TraesCS7D02G452900
BI-1	Barley	HORVU6Hr1G014450	OG0005821	TraesCS6A02G083200	BdiBd21-3.3G0030500
				TraesCS6B02G113900
				TraesCS6D02G077000
FAH1	Arabidopsis	AT2G34770	OG0006155	TraesCS5A02G019200	BdiBd21-3.1G0091300
				TraesCS5D02G024600	BdiBd21-3.4G0011900
				TraesCS5D02G424200
AtWRKY4	Arabidopsis	AT1G13960	OG0006371	TraesCS5A02G104900	BdiBd21-3.4G0091100
				TraesCS5B02G108500
				TraesCS5D02G116100
AtWRKY25	Arabidopsis	AT2G30250	OG0006441	TraesCS1A02G070400	BdiBd21-3.2G0000500
				TraesCS1B02G088900	BdiBd21-3.4G0022900
				TraesCS1D02G072900
PMR5	Arabidopsis	AT5G58600	OG0006850	TraesCS4A02G109700	BdiBd21-3.1G0882900
				TraesCS4B02G194500
				TraesCS4D02G195200
AtNFXL1	Arabidopsis	AT1G10170	OG0007192	TraesCS7A02G518800	BdiBd21-3.1G0577800
				TraesCS7B02G432300
				TraesCS7B02G434700
				TraesCS7D02G508800
IBR3	Arabidopsis	AT3G06810	OG0007221	TraesCS2A02G109700	BdiBd21-3.1G0234900
				TraesCS2B02G127700
				TraesCS2D02G109900
EIL1	Arabidopsis	AT2G27050	OG0007228	TraesCS4A02G129400	BdiBd21-3.1G0860700
				TraesCS4B02G175100
				TraesCS4D02G177000
EIN3	Arabidopsis	AT3G20770	OG0007228	TraesCS4A02G129400	BdiBd21-3.1G0860700
				TraesCS4B02G175100
				TraesCS4D02G177000
SIZ1	Arabidopsis	AT5G60410	OG0007262	TraesCS1A02G065700	BdiBd21-3.1G0970200
				TraesCS1B02G083900	BdiBd21-3.2G0483000
				TraesCS1D02G066700
LSD1	Arabidopsis	AT4G20380	OG0007723	TraesCS3A02G219500	BdiBd21-3.2G0553750
				TraesCS3B02G250000
				TraesCS3D02G233000
BON2	Arabidopsis	AT5G07300	OG0007999	TraesCS6A02G189800	BdiBd21-3.3G0589400
				TraesCS6B02G235200
				TraesCS6D02G176800
BON1	Arabidopsis	AT5G61900	OG0007999	TraesCS6A02G189800	BdiBd21-3.3G0589400
				TraesCS6B02G235200
				TraesCS6D02G176800
PFT1	Arabidopsis	AT1G25540	OG0009045	TraesCS5A02G179400	BdiBd21-3.4G0388200
				TraesCS5B02G177300
				TraesCS5D02G184100
AtSRT2	Arabidopsis	AT5G09230	OG0009278	TraesCS5A02G114700	BdiBd21-3.4G0571600
				TraesCS5D02G124700
				TraesCSU02G136000
S3H	Arabidopsis	AT4G10500	OG0009499	TraesCS2A02G394900	BdiBd21-3.5G0251600
				TraesCS2B02G412900
				TraesCS2D02G392900
PSKR1	Arabidopsis	AT2G02220	OG0009671	TraesCS2A02G550200	BdiBd21-3.5G0339400
				TraesCS2B02G580800
				TraesCS2D02G551200
VAD1	Arabidopsis	AT1G02120	OG0010224	TraesCS2A02G231900	BdiBd21-3.1G0357000
				TraesCS2B02G253500
				TraesCS2D02G236800
DMR6	Arabidopsis	AT5G24530	OG0010403	TraesCS4B02G346900	BdiBd21-3.1G1026800
				TraesCS4D02G341800
EIR1	Arabidopsis	AT5G57090	OG0010712	TraesCS7A02G492400	BdiBd21-3.1G0422900
				TraesCS7B02G398100
				TraesCS7D02G478800
SRFR1	Arabidopsis	AT4G37460	OG0010945	TraesCS2A02G263200	BdiBd21-3.1G0796700
				TraesCS2B02G279000
				TraesCS2D02G260800
RIN4	Arabidopsis	AT3G25070	OG0011021	TraesCS4A02G335300	BdiBd21-3.1G0022000
				TraesCS5B02G549800
				TraesCS5D02G536800
BIR1	Arabidopsis	AT5G48380	OG0011159	TraesCS1A02G259600	BdiBd21-3.2G0333200
				TraesCS1B02G269900
				TraesCS1D02G259400
SNI1	Arabidopsis	AT4G18470	OG0012212	TraesCS6A02G213300	BdiBd21-3.3G0158500
				TraesCS6B02G243400
				TraesCS6D02G196000
RAR1	Arabidopsis	AT5G51700	OG0012407	TraesCS2A02G414300	BdiBd21-3.3G0597600
				TraesCS2B02G433400
				TraesCS2D02G411600
PUX2	Arabidopsis	AT2G01650	OG0013979	TraesCS5A02G204800	BdiBd21-3.4G0419500
				TraesCS5D02G211300
RIC171	Barley	HORVU2Hr1G107040	OG0014411	TraesCS2A02G474300	BdiBd21-3.5G0296800
				TraesCS2B02G497800
				TraesCS2D02G474000
ACD11	Arabidopsis	AT2G34690	OG0015115	TraesCS5A02G423200	BdiBd21-3.1G0087500
				TraesCS5D02G431800
AtAGD5	Arabidopsis	AT5G54310	OG0015434	TraesCS2A02G203600	BdiBd21-3.1G0323200
				TraesCS2B02G230900
				TraesCS2D02G212100
DND1	Arabidopsis	AT5G15410	OG0018857	TraesCS5D02G404600	BdiBd21-3.1G0110600
SSI1	Arabidopsis	AT5G24300	OG0018876	TraesCS7B02G018600	BdiBd21-3.1G0642800
