# Supplementary material for: Identification of Candidate Susceptibility Genes to Puccinia graminis f. sp. tritici in Wheat
Source: Front Plant Sci. 2021 Apr 21;12:657796. doi: 10.3389/fpls.2021.657796 (PMC8097158; doi:10.3389/fpls.2021.657796)
Supplement: Supplementary file 4 [file Table_4.XLSX]

## Sheet: table_s4
Table S4. List of orthogroups containing two
or more genes
Orthogroup number	Gene ID
OG0000000	TraesCS1A02G042000
OG0000000	TraesCS1A02G068800
OG0000000	TraesCS1A02G085100
OG0000000	TraesCS1A02G086000
OG0000000	TraesCS1A02G172400
OG0000000	TraesCS1A02G267400
OG0000000	TraesCS1A02G342200
OG0000000	TraesCS1A02G427900
OG0000000	TraesCS1B02G059600
OG0000000	TraesCS1B02G089200
OG0000000	TraesCS1B02G328100
OG0000000	TraesCS1B02G343400
OG0000000	TraesCS1B02G397600
OG0000000	TraesCS1B02G421900
OG0000000	TraesCS1B02G424600
OG0000000	TraesCS1B02G476200
OG0000000	TraesCS1D02G036600
OG0000000	TraesCS1D02G045900
OG0000000	TraesCS1D02G046800
OG0000000	TraesCS1D02G348300
OG0000000	TraesCS1D02G395500
OG0000000	TraesCS2A02G015500
OG0000000	TraesCS2A02G096700
OG0000000	TraesCS2A02G152800
OG0000000	TraesCS2A02G226100
OG0000000	TraesCS2A02G326800
OG0000000	TraesCS2A02G367900
OG0000000	TraesCS2A02G404300
OG0000000	TraesCS2A02G418600
OG0000000	TraesCS2A02G422200
OG0000000	TraesCS2A02G422800
OG0000000	TraesCS2A02G429300
OG0000000	TraesCS2A02G522000
OG0000000	TraesCS2A02G563800
OG0000000	TraesCS2A02G578600
OG0000000	TraesCS2A02G584500
OG0000000	TraesCS2B02G001500
OG0000000	TraesCS2B02G008200
OG0000000	TraesCS2B02G028100
OG0000000	TraesCS2B02G052900
OG0000000	TraesCS2B02G092500
OG0000000	TraesCS2B02G109600
OG0000000	TraesCS2B02G377400
OG0000000	TraesCS2B02G566200
OG0000000	TraesCS2B02G589900
OG0000000	TraesCS2B02G597900
OG0000000	TraesCS2B02G598200
OG0000000	TraesCS2B02G607900
OG0000000	TraesCS2D02G044500
OG0000000	TraesCS2D02G143500
OG0000000	TraesCS2D02G237000
OG0000000	TraesCS2D02G269300
OG0000000	TraesCS2D02G341000
OG0000000	TraesCS2D02G391300
OG0000000	TraesCS2D02G436600
OG0000000	TraesCS3A02G014300
OG0000000	TraesCS3A02G110800
OG0000000	TraesCS3A02G162500
OG0000000	TraesCS3A02G344200
OG0000000	TraesCS3A02G368500
OG0000000	TraesCS3A02G384700
OG0000000	TraesCS3A02G440500
OG0000000	TraesCS3A02G493400
OG0000000	TraesCS3A02G496800
OG0000000	TraesCS3A02G518900
OG0000000	TraesCS3A02G535800
OG0000000	TraesCS3B02G040700
OG0000000	TraesCS3B02G058300
OG0000000	TraesCS3B02G082600
OG0000000	TraesCS3B02G086800
OG0000000	TraesCS3B02G138500
OG0000000	TraesCS3B02G236800
OG0000000	TraesCS3B02G240400
OG0000000	TraesCS3B02G283300
OG0000000	TraesCS3B02G423900
OG0000000	TraesCS3B02G464300
OG0000000	TraesCS3B02G520400
OG0000000	TraesCS3B02G539700
OG0000000	TraesCS3B02G574200
OG0000000	TraesCS3D02G046400
OG0000000	TraesCS3D02G046500
OG0000000	TraesCS3D02G162000
OG0000000	TraesCS3D02G266500
OG0000000	TraesCS3D02G297100
OG0000000	TraesCS3D02G336000
OG0000000	TraesCS3D02G361400
OG0000000	TraesCS3D02G433500
OG0000000	TraesCS4A02G036300
OG0000000	TraesCS4A02G350600
OG0000000	TraesCS4A02G383800
OG0000000	TraesCS4A02G420500
OG0000000	TraesCS4A02G432100
OG0000000	TraesCS4A02G459000
OG0000000	TraesCS4B02G005400
OG0000000	TraesCS4B02G025800
OG0000000	TraesCS4B02G036000
OG0000000	TraesCS4B02G082000
OG0000000	TraesCS4B02G096300
OG0000000	TraesCS4B02G137000
OG0000000	TraesCS4B02G168500
OG0000000	TraesCS4B02G349600
OG0000000	TraesCS4B02G354100
OG0000000	TraesCS4D02G067900
OG0000000	TraesCS4D02G100900
OG0000000	TraesCS5A02G017800
OG0000000	TraesCS5A02G031400
OG0000000	TraesCS5A02G040200
OG0000000	TraesCS5A02G075800
OG0000000	TraesCS5A02G100800
OG0000000	TraesCS5A02G168000
OG0000000	TraesCS5A02G246400
OG0000000	TraesCS5A02G352500
OG0000000	TraesCS5A02G362500
OG0000000	TraesCS5A02G476100
OG0000000	TraesCS5A02G530900
OG0000000	TraesCS5A02G548900
OG0000000	TraesCS5A02G550000
OG0000000	TraesCS5B02G002200
OG0000000	TraesCS5B02G092800
OG0000000	TraesCS5B02G267100
OG0000000	TraesCS5B02G334800
OG0000000	TraesCS5B02G385200
OG0000000	TraesCS5B02G439800
OG0000000	TraesCS5B02G498900
OG0000000	TraesCS5B02G508300
OG0000000	TraesCS5B02G537500
OG0000000	TraesCS5D02G012600
OG0000000	TraesCS5D02G047500
OG0000000	TraesCS5D02G082300
OG0000000	TraesCS5D02G101700
OG0000000	TraesCS5D02G215900
OG0000000	TraesCS5D02G251400
OG0000000	TraesCS5D02G257300
OG0000000	TraesCS5D02G409100
OG0000000	TraesCS5D02G422400
OG0000000	TraesCS5D02G478000
OG0000000	TraesCS5D02G484200
OG0000000	TraesCS5D02G518200
OG0000000	TraesCS6A02G008500
OG0000000	TraesCS6A02G089700
OG0000000	TraesCS6A02G094900
OG0000000	TraesCS6A02G157600
OG0000000	TraesCS6A02G178300
OG0000000	TraesCS6A02G180000
OG0000000	TraesCS6A02G254000
OG0000000	TraesCS6A02G300800
OG0000000	TraesCS6A02G342300
OG0000000	TraesCS6A02G391400
OG0000000	TraesCS6A02G418100
OG0000000	TraesCS6A02G420500
OG0000000	TraesCS6B02G014000
OG0000000	TraesCS6B02G050500
OG0000000	TraesCS6B02G121500
OG0000000	TraesCS6B02G199100
OG0000000	TraesCS6B02G226100
OG0000000	TraesCS6B02G254100
OG0000000	TraesCS6B02G272600
OG0000000	TraesCS6B02G274400
OG0000000	TraesCS6B02G385700
OG0000000	TraesCS6B02G392300
OG0000000	TraesCS6D02G013300
OG0000000	TraesCS6D02G054700
OG0000000	TraesCS6D02G061900
OG0000000	TraesCS6D02G087100
OG0000000	TraesCS6D02G140300
OG0000000	TraesCS6D02G221500
OG0000000	TraesCS6D02G235100
OG0000000	TraesCS6D02G322500
OG0000000	TraesCS7A02G040200
OG0000000	TraesCS7A02G062300
OG0000000	TraesCS7A02G071300
OG0000000	TraesCS7A02G073500
OG0000000	TraesCS7A02G085000
OG0000000	TraesCS7A02G097300
OG0000000	TraesCS7A02G285900
OG0000000	TraesCS7A02G509600
OG0000000	TraesCS7A02G517500
OG0000000	TraesCS7A02G529800
OG0000000	TraesCS7B02G004100
OG0000000	TraesCS7B02G014600
OG0000000	TraesCS7B02G052100
OG0000000	TraesCS7B02G055500
OG0000000	TraesCS7B02G069900
OG0000000	TraesCS7B02G112600
OG0000000	TraesCS7B02G152500
OG0000000	TraesCS7B02G188100
OG0000000	TraesCS7B02G264700
OG0000000	TraesCS7B02G274000
OG0000000	TraesCS7B02G295400
OG0000000	TraesCS7B02G309000
OG0000000	TraesCS7B02G423600
OG0000000	TraesCS7B02G436200
OG0000000	TraesCS7B02G490400
OG0000000	TraesCS7D02G045300
OG0000000	TraesCS7D02G105800
OG0000000	TraesCS7D02G164800
OG0000000	TraesCS7D02G296200
OG0000000	TraesCS7D02G343000
OG0000000	TraesCS7D02G455700
OG0000000	TraesCS7D02G461400
OG0000000	TraesCS7D02G529000
OG0000000	TraesCSU02G018600
OG0000000	TraesCSU02G055400
OG0000000	TraesCSU02G056400
OG0000000	TraesCSU02G100200
OG0000000	TraesCSU02G107000
OG0000000	TraesCSU02G148900
OG0000000	TraesCSU02G161400
OG0000000	TraesCSU02G189200
OG0000000	TraesCSU02G202700
OG0000000	TraesCSU02G245100
OG0000001	BdiBd21-3.3G0425550
OG0000001	HORVU0Hr1G003880
OG0000001	HORVU0Hr1G010990
OG0000001	HORVU1Hr1G008970
OG0000001	HORVU1Hr1G016000
OG0000001	HORVU1Hr1G026630
OG0000001	HORVU1Hr1G029760
OG0000001	HORVU1Hr1G037630
OG0000001	HORVU1Hr1G040260
OG0000001	HORVU1Hr1G040330
OG0000001	HORVU1Hr1G041950
OG0000001	HORVU1Hr1G042330
OG0000001	HORVU1Hr1G042740
OG0000001	HORVU1Hr1G043320
OG0000001	HORVU1Hr1G044380
OG0000001	HORVU1Hr1G055110
OG0000001	HORVU1Hr1G059240
OG0000001	HORVU1Hr1G059460
OG0000001	HORVU1Hr1G084000
OG0000001	HORVU1Hr1G084070
OG0000001	HORVU1Hr1G093090
OG0000001	HORVU2Hr1G018660
OG0000001	HORVU2Hr1G019750
OG0000001	HORVU2Hr1G026290
OG0000001	HORVU2Hr1G026300
OG0000001	HORVU2Hr1G027100
OG0000001	HORVU2Hr1G027110
OG0000001	HORVU2Hr1G029650
OG0000001	HORVU2Hr1G034820
OG0000001	HORVU2Hr1G047570
OG0000001	HORVU2Hr1G048780
OG0000001	HORVU2Hr1G049810
OG0000001	HORVU2Hr1G050830
OG0000001	HORVU2Hr1G051710
OG0000001	HORVU2Hr1G051720
OG0000001	HORVU2Hr1G052470
OG0000001	HORVU2Hr1G054010
OG0000001	HORVU2Hr1G054990
OG0000001	HORVU2Hr1G055660
OG0000001	HORVU2Hr1G055670
OG0000001	HORVU2Hr1G055880
OG0000001	HORVU2Hr1G056850
OG0000001	HORVU2Hr1G057230
OG0000001	HORVU2Hr1G059290
OG0000001	HORVU2Hr1G059590
OG0000001	HORVU2Hr1G060470
OG0000001	HORVU2Hr1G063970
OG0000001	HORVU2Hr1G072510
OG0000001	HORVU2Hr1G072520
OG0000001	HORVU2Hr1G073620
OG0000001	HORVU2Hr1G075560
OG0000001	HORVU2Hr1G078940
OG0000001	HORVU2Hr1G082290
OG0000001	HORVU2Hr1G127020
OG0000001	HORVU2Hr1G127030
OG0000001	HORVU2Hr1G127040
OG0000001	HORVU3Hr1G014030
OG0000001	HORVU3Hr1G014040
OG0000001	HORVU3Hr1G016620
OG0000001	HORVU3Hr1G021060
OG0000001	HORVU3Hr1G024300
OG0000001	HORVU3Hr1G024720
OG0000001	HORVU3Hr1G025140
OG0000001	HORVU3Hr1G025150
OG0000001	HORVU3Hr1G028580
OG0000001	HORVU3Hr1G036750
OG0000001	HORVU3Hr1G037880
OG0000001	HORVU3Hr1G037890
OG0000001	HORVU3Hr1G042930
OG0000001	HORVU3Hr1G047730
OG0000001	HORVU3Hr1G048000
OG0000001	HORVU3Hr1G049000
OG0000001	HORVU3Hr1G049440
OG0000001	HORVU3Hr1G050040
OG0000001	HORVU3Hr1G051440
OG0000001	HORVU3Hr1G053930
OG0000001	HORVU3Hr1G057420
OG0000001	HORVU3Hr1G058490
OG0000001	HORVU3Hr1G061320
OG0000001	HORVU3Hr1G063380
OG0000001	HORVU3Hr1G064900
OG0000001	HORVU3Hr1G074340
OG0000001	HORVU3Hr1G075560
OG0000001	HORVU3Hr1G109070
OG0000001	HORVU3Hr1G109080
OG0000001	HORVU3Hr1G110640
OG0000001	HORVU4Hr1G004600
OG0000001	HORVU4Hr1G010220
OG0000001	HORVU4Hr1G015130
OG0000001	HORVU4Hr1G017960
OG0000001	HORVU4Hr1G024850
OG0000001	HORVU4Hr1G024860
OG0000001	HORVU4Hr1G024870
OG0000001	HORVU4Hr1G034980
OG0000001	HORVU4Hr1G036440
OG0000001	HORVU4Hr1G037730
OG0000001	HORVU4Hr1G038290
OG0000001	HORVU4Hr1G038300
OG0000001	HORVU4Hr1G038420
OG0000001	HORVU4Hr1G039210
OG0000001	HORVU4Hr1G039350
OG0000001	HORVU4Hr1G039760
OG0000001	HORVU4Hr1G040180
OG0000001	HORVU4Hr1G044280
OG0000001	HORVU4Hr1G045800
OG0000001	HORVU4Hr1G047200
OG0000001	HORVU4Hr1G047800
OG0000001	HORVU4Hr1G048410
OG0000001	HORVU4Hr1G062190
OG0000001	HORVU4Hr1G062320
OG0000001	HORVU4Hr1G074240
OG0000001	HORVU4Hr1G082960
OG0000001	HORVU4Hr1G087000
OG0000001	HORVU5Hr1G000020
OG0000001	HORVU5Hr1G009700
OG0000001	HORVU5Hr1G013300
OG0000001	HORVU5Hr1G016990
OG0000001	HORVU5Hr1G018310
OG0000001	HORVU5Hr1G020600
OG0000001	HORVU5Hr1G020610
OG0000001	HORVU5Hr1G020620
OG0000001	HORVU5Hr1G022400
OG0000001	HORVU5Hr1G028780
OG0000001	HORVU5Hr1G029780
OG0000001	HORVU5Hr1G032800
OG0000001	HORVU5Hr1G034430
OG0000001	HORVU5Hr1G035860
OG0000001	HORVU5Hr1G039460
OG0000001	HORVU5Hr1G039480
OG0000001	HORVU5Hr1G042170
OG0000001	HORVU5Hr1G044880
OG0000001	HORVU5Hr1G053100
OG0000001	HORVU5Hr1G054890
OG0000001	HORVU5Hr1G055990
OG0000001	HORVU5Hr1G056000
OG0000001	HORVU5Hr1G056250
OG0000001	HORVU5Hr1G056260
OG0000001	HORVU5Hr1G060280
OG0000001	HORVU5Hr1G061220
OG0000001	HORVU5Hr1G061230
OG0000001	HORVU5Hr1G066390
OG0000001	HORVU5Hr1G068670
OG0000001	HORVU5Hr1G068680
OG0000001	HORVU5Hr1G077210
OG0000001	HORVU5Hr1G078600
OG0000001	HORVU5Hr1G113890
OG0000001	HORVU6Hr1G004880
OG0000001	HORVU6Hr1G017250
OG0000001	HORVU6Hr1G017260
OG0000001	HORVU6Hr1G018550
OG0000001	HORVU6Hr1G020430
OG0000001	HORVU6Hr1G026090
OG0000001	HORVU6Hr1G026420
OG0000001	HORVU6Hr1G029900
OG0000001	HORVU6Hr1G031270
OG0000001	HORVU6Hr1G031280
OG0000001	HORVU6Hr1G035840
OG0000001	HORVU6Hr1G038050
OG0000001	HORVU6Hr1G038060
OG0000001	HORVU6Hr1G043560
OG0000001	HORVU6Hr1G043570
OG0000001	HORVU6Hr1G045930
OG0000001	HORVU6Hr1G047180
OG0000001	HORVU6Hr1G055120
OG0000001	HORVU6Hr1G058330
OG0000001	HORVU6Hr1G059170
OG0000001	HORVU6Hr1G068880
OG0000001	HORVU6Hr1G073450
OG0000001	HORVU6Hr1G093550
OG0000001	HORVU7Hr1G012090
OG0000001	HORVU7Hr1G030990
OG0000001	HORVU7Hr1G031000
OG0000001	HORVU7Hr1G040330
OG0000001	HORVU7Hr1G040340
OG0000001	HORVU7Hr1G043170
OG0000001	HORVU7Hr1G047280
OG0000001	HORVU7Hr1G047600
OG0000001	HORVU7Hr1G048270
OG0000001	HORVU7Hr1G048350
OG0000001	HORVU7Hr1G048360
OG0000001	HORVU7Hr1G050800
OG0000001	HORVU7Hr1G051770
OG0000001	HORVU7Hr1G051800
OG0000001	HORVU7Hr1G056350
OG0000001	HORVU7Hr1G062270
OG0000001	HORVU7Hr1G062790
OG0000001	HORVU7Hr1G064000
OG0000001	HORVU7Hr1G064620
OG0000001	HORVU7Hr1G068030
OG0000001	HORVU7Hr1G068330
OG0000001	HORVU7Hr1G068570
OG0000001	HORVU7Hr1G070880
OG0000001	HORVU7Hr1G071860
OG0000001	HORVU7Hr1G072810
OG0000001	HORVU7Hr1G072820
OG0000001	HORVU7Hr1G077730
OG0000001	HORVU7Hr1G078200
OG0000001	HORVU7Hr1G086110
OG0000001	HORVU7Hr1G088830
OG0000001	HORVU7Hr1G115930
OG0000002	BdiBd21-3.1G0097800
OG0000002	BdiBd21-3.1G0144500
OG0000002	BdiBd21-3.1G0151700
OG0000002	BdiBd21-3.1G0153100
OG0000002	BdiBd21-3.1G0360000
OG0000002	BdiBd21-3.1G0361400
OG0000002	BdiBd21-3.1G0369800
OG0000002	BdiBd21-3.1G0372000
OG0000002	BdiBd21-3.1G0404900
OG0000002	BdiBd21-3.1G0419600
OG0000002	BdiBd21-3.1G0501200
OG0000002	BdiBd21-3.1G0514000
OG0000002	BdiBd21-3.1G0524900
OG0000002	BdiBd21-3.1G0552200
OG0000002	BdiBd21-3.1G0561800
OG0000002	BdiBd21-3.1G0568800
OG0000002	BdiBd21-3.1G0573500
OG0000002	BdiBd21-3.1G0586100
OG0000002	BdiBd21-3.1G0613300
OG0000002	BdiBd21-3.1G0641100
OG0000002	BdiBd21-3.1G0665400
OG0000002	BdiBd21-3.1G0673800
OG0000002	BdiBd21-3.1G0703300
OG0000002	BdiBd21-3.1G0704200
OG0000002	BdiBd21-3.1G0723800
OG0000002	BdiBd21-3.1G0772800
OG0000002	BdiBd21-3.1G0773200
OG0000002	BdiBd21-3.1G0780900
OG0000002	BdiBd21-3.1G0787400
OG0000002	BdiBd21-3.1G0799200
OG0000002	BdiBd21-3.1G0813500
OG0000002	BdiBd21-3.1G0814100
OG0000002	BdiBd21-3.1G0814900
OG0000002	BdiBd21-3.1G0851500
OG0000002	BdiBd21-3.1G0879600
OG0000002	BdiBd21-3.1G0896900
OG0000002	BdiBd21-3.1G0898900
OG0000002	BdiBd21-3.1G0935800
OG0000002	BdiBd21-3.1G0936200
OG0000002	BdiBd21-3.1G0976000
OG0000002	BdiBd21-3.1G1027800
OG0000002	BdiBd21-3.1G1044100
OG0000002	BdiBd21-3.2G0108300
OG0000002	BdiBd21-3.2G0136300
OG0000002	BdiBd21-3.2G0169500
OG0000002	BdiBd21-3.2G0199400
OG0000002	BdiBd21-3.2G0219500
OG0000002	BdiBd21-3.2G0230900
OG0000002	BdiBd21-3.2G0233100
OG0000002	BdiBd21-3.2G0258200
OG0000002	BdiBd21-3.2G0272100
OG0000002	BdiBd21-3.2G0290200
OG0000002	BdiBd21-3.2G0299900
OG0000002	BdiBd21-3.2G0313000
OG0000002	BdiBd21-3.2G0364400
OG0000002	BdiBd21-3.2G0392600
OG0000002	BdiBd21-3.2G0436900
OG0000002	BdiBd21-3.2G0441800
OG0000002	BdiBd21-3.2G0441900
OG0000002	BdiBd21-3.2G0452000
OG0000002	BdiBd21-3.2G0454500
OG0000002	BdiBd21-3.2G0462100
OG0000002	BdiBd21-3.2G0469100
OG0000002	BdiBd21-3.2G0472700
OG0000002	BdiBd21-3.2G0567000
OG0000002	BdiBd21-3.2G0569600
OG0000002	BdiBd21-3.2G0573300
OG0000002	BdiBd21-3.2G0717900
OG0000002	BdiBd21-3.3G0007800
OG0000002	BdiBd21-3.3G0031300
OG0000002	BdiBd21-3.3G0070200
OG0000002	BdiBd21-3.3G0074000
OG0000002	BdiBd21-3.3G0123300
OG0000002	BdiBd21-3.3G0129200
OG0000002	BdiBd21-3.3G0167600
OG0000002	BdiBd21-3.3G0188100
OG0000002	BdiBd21-3.3G0205100
OG0000002	BdiBd21-3.3G0248500
OG0000002	BdiBd21-3.3G0255200
OG0000002	BdiBd21-3.3G0258900
OG0000002	BdiBd21-3.3G0270000
OG0000002	BdiBd21-3.3G0307900
OG0000002	BdiBd21-3.3G0325600
OG0000002	BdiBd21-3.3G0325800
OG0000002	BdiBd21-3.3G0349600
OG0000002	BdiBd21-3.3G0358000
OG0000002	BdiBd21-3.3G0370800
OG0000002	BdiBd21-3.3G0419100
OG0000002	BdiBd21-3.3G0431000
OG0000002	BdiBd21-3.3G0456300
OG0000002	BdiBd21-3.3G0574000
OG0000002	BdiBd21-3.3G0577500
OG0000002	BdiBd21-3.3G0673800
OG0000002	BdiBd21-3.3G0713000
OG0000002	BdiBd21-3.3G0779400
OG0000002	BdiBd21-3.4G0033600
OG0000002	BdiBd21-3.4G0074300
OG0000002	BdiBd21-3.4G0140400
OG0000002	BdiBd21-3.4G0161400
OG0000002	BdiBd21-3.4G0164400
OG0000002	BdiBd21-3.4G0169400
OG0000002	BdiBd21-3.4G0176100
OG0000002	BdiBd21-3.4G0179200
OG0000002	BdiBd21-3.4G0182700
OG0000002	BdiBd21-3.4G0203900
OG0000002	BdiBd21-3.4G0205400
OG0000002	BdiBd21-3.4G0237200
OG0000002	BdiBd21-3.4G0258200
OG0000002	BdiBd21-3.4G0280200
OG0000002	BdiBd21-3.4G0289300
OG0000002	BdiBd21-3.4G0291400
OG0000002	BdiBd21-3.4G0293500
OG0000002	BdiBd21-3.4G0297400
OG0000002	BdiBd21-3.4G0301000
OG0000002	BdiBd21-3.4G0302800
OG0000002	BdiBd21-3.4G0313600
OG0000002	BdiBd21-3.4G0317800
OG0000002	BdiBd21-3.4G0319200
OG0000002	BdiBd21-3.4G0340500
OG0000002	BdiBd21-3.4G0350300
OG0000002	BdiBd21-3.4G0391500
OG0000002	BdiBd21-3.4G0430600
OG0000002	BdiBd21-3.4G0444000
OG0000002	BdiBd21-3.4G0479700
OG0000002	BdiBd21-3.4G0517600
OG0000002	BdiBd21-3.4G0599400
OG0000002	BdiBd21-3.5G0038300
OG0000002	BdiBd21-3.5G0056400
OG0000002	BdiBd21-3.5G0062400
OG0000002	BdiBd21-3.5G0062900
OG0000002	BdiBd21-3.5G0091600
OG0000002	BdiBd21-3.5G0101800
OG0000002	BdiBd21-3.5G0113000
OG0000002	BdiBd21-3.5G0145600
OG0000002	BdiBd21-3.5G0213500
OG0000002	BdiBd21-3.5G0217500
OG0000002	BdiBd21-3.5G0242600
OG0000002	BdiBd21-3.5G0263100
OG0000002	BdiBd21-3.5G0356700
OG0000002	BdiBd21-3.F0001200
OG0000003	AT1G47915
OG0000003	BdiBd21-3.1G0207500
OG0000003	BdiBd21-3.1G0361300
OG0000003	BdiBd21-3.1G0411550
OG0000003	BdiBd21-3.1G0656500
OG0000003	BdiBd21-3.1G0740866
OG0000003	BdiBd21-3.1G0890800
OG0000003	BdiBd21-3.2G0212400
OG0000003	BdiBd21-3.2G0212532
OG0000003	BdiBd21-3.2G0212600
OG0000003	BdiBd21-3.2G0265500
OG0000003	BdiBd21-3.2G0459200
OG0000003	BdiBd21-3.2G0459500
OG0000003	BdiBd21-3.2G0459600
OG0000003	BdiBd21-3.2G0459900
OG0000003	BdiBd21-3.2G0460100
OG0000003	BdiBd21-3.2G0464900
OG0000003	BdiBd21-3.2G0465200
OG0000003	BdiBd21-3.3G0026600
OG0000003	BdiBd21-3.3G0061400
OG0000003	BdiBd21-3.3G0148000
OG0000003	BdiBd21-3.3G0148100
OG0000003	BdiBd21-3.3G0260100
OG0000003	BdiBd21-3.3G0332600
OG0000003	BdiBd21-3.3G0483600
OG0000003	BdiBd21-3.4G0036301
OG0000003	BdiBd21-3.4G0039500
OG0000003	BdiBd21-3.4G0039600
OG0000003	BdiBd21-3.4G0039700
OG0000003	BdiBd21-3.4G0039900
OG0000003	BdiBd21-3.4G0040000
OG0000003	BdiBd21-3.4G0040200
OG0000003	BdiBd21-3.4G0042100
OG0000003	BdiBd21-3.4G0063300
OG0000003	BdiBd21-3.4G0305000
OG0000003	BdiBd21-3.5G0071800
OG0000003	HORVU1Hr1G089950
OG0000003	HORVU3Hr1G028340
OG0000003	HORVU5Hr1G007870
OG0000003	HORVU5Hr1G018120
OG0000003	HORVU5Hr1G018290
OG0000003	HORVU5Hr1G018300
OG0000003	HORVU5Hr1G052200
OG0000003	HORVU5Hr1G067680
OG0000003	HORVU6Hr1G013630
OG0000003	HORVU7Hr1G101910
OG0000003	TraesCS1A02G045100
OG0000003	TraesCS1A02G063300
OG0000003	TraesCS1A02G085700
OG0000003	TraesCS1A02G085900
OG0000003	TraesCS1A02G409100
OG0000003	TraesCS1B02G058400
OG0000003	TraesCS1B02G102800
OG0000003	TraesCS1B02G102900
OG0000003	TraesCS1B02G103100
OG0000003	TraesCS1B02G103300
OG0000003	TraesCS1B02G103500
OG0000003	TraesCS1B02G103600
OG0000003	TraesCS1B02G103800
OG0000003	TraesCS1B02G104000
OG0000003	TraesCS1B02G437700
OG0000003	TraesCS1D02G045800
OG0000003	TraesCS1D02G086900
OG0000003	TraesCS1D02G087000
OG0000003	TraesCS1D02G087400
OG0000003	TraesCS1D02G416100
OG0000003	TraesCS5A02G029100
OG0000003	TraesCS5A02G067800
OG0000003	TraesCS5A02G068100
OG0000003	TraesCS5A02G069200
OG0000003	TraesCS5A02G069300
OG0000003	TraesCS5A02G169800
OG0000003	TraesCS5A02G234900
OG0000003	TraesCS5B02G074700
OG0000003	TraesCS5B02G075600
OG0000003	TraesCS5B02G166600
OG0000003	TraesCS5B02G453700
OG0000003	TraesCS5B02G456300
OG0000003	TraesCS5D02G080300
OG0000003	TraesCS5D02G081300
OG0000003	TraesCS5D02G081400
OG0000003	TraesCS5D02G081500
OG0000003	TraesCS5D02G174200
OG0000003	TraesCS5D02G241900
OG0000003	TraesCS6A02G065300
OG0000003	TraesCS6A02G077600
OG0000003	TraesCS6A02G077700
OG0000003	TraesCS6A02G095100
OG0000003	TraesCS6B02G088000
OG0000003	TraesCS6B02G088100
OG0000003	TraesCS6B02G088200
OG0000003	TraesCS6B02G088300
OG0000003	TraesCS6B02G104100
OG0000003	TraesCS6B02G104200
OG0000003	TraesCS6B02G104700
OG0000003	TraesCS6D02G107200
OG0000003	TraesCS7A02G450900
OG0000003	TraesCS7A02G451000
OG0000003	TraesCS7B02G263200
OG0000003	TraesCS7B02G263400
OG0000003	TraesCS7B02G350600
OG0000003	TraesCS7B02G350700
OG0000003	TraesCS7B02G350800
OG0000003	TraesCS7D02G358500
OG0000003	TraesCS7D02G440100
OG0000003	TraesCS7D02G505000
OG0000003	TraesCSU02G025700
OG0000003	TraesCSU02G026000
OG0000003	TraesCSU02G026100
OG0000003	TraesCSU02G118900
OG0000003	TraesCSU02G119400
OG0000003	TraesCSU02G119500
OG0000003	TraesCSU02G123000
OG0000003	TraesCSU02G142400
OG0000003	TraesCSU02G142600
OG0000004	AT1G19160
OG0000004	AT1G23037
OG0000004	AT1G26510
OG0000004	AT1G26515
OG0000004	AT1G30780
OG0000004	AT1G30790
OG0000004	AT1G30920
OG0000004	AT1G30925
OG0000004	AT1G30930
OG0000004	AT1G31000
OG0000004	AT1G31080
OG0000004	AT1G31090
OG0000004	AT1G31163
OG0000004	AT1G31620
OG0000004	AT1G32420
OG0000004	AT1G32660
OG0000004	AT1G33010
OG0000004	AT1G33020
OG0000004	AT1G43005
OG0000004	AT1G46840
OG0000004	AT1G46912
OG0000004	AT1G46984
OG0000004	AT1G47300
OG0000004	AT1G47340
OG0000004	AT1G47350
OG0000004	AT1G47730
OG0000004	AT1G47765
OG0000004	AT1G47790
OG0000004	AT1G47800
OG0000004	AT1G47810
OG0000004	AT1G48060
OG0000004	AT1G50870
OG0000004	AT1G50880
OG0000004	AT1G52490
OG0000004	AT1G53360
OG0000004	AT1G53370
OG0000004	AT1G53550
OG0000004	AT1G53790
OG0000004	AT1G53815
OG0000004	AT1G55070
OG0000004	AT1G59675
OG0000004	AT1G59690
OG0000004	AT1G60370
OG0000004	AT1G61060
OG0000004	AT1G67130
OG0000004	AT1G70380
OG0000004	AT1G70390
OG0000004	AT1G70960
OG0000004	AT1G70970
OG0000004	AT1G71290
OG0000004	AT1G76830
OG0000004	AT2G02660
OG0000004	AT2G02890
OG0000004	AT2G13630
OG0000004	AT2G15640
OG0000004	AT2G16220
OG0000004	AT2G16450
OG0000004	AT2G16810
OG0000004	AT2G19630
OG0000004	AT2G21930
OG0000004	AT2G23160
OG0000004	AT2G31470
OG0000004	AT2G32470
OG0000004	AT2G40910
OG0000004	AT2G40920
OG0000004	AT2G40925
OG0000004	AT3G04660
OG0000004	AT3G06280
OG0000004	AT3G10240
OG0000004	AT3G10790
OG0000004	AT3G10990
OG0000004	AT3G23960
OG0000004	AT3G47020
OG0000004	AT3G47030
OG0000004	AT3G47130
OG0000004	AT3G47140
OG0000004	AT3G47150
OG0000004	AT3G49440
OG0000004	AT3G49450
OG0000004	AT3G52320
OG0000004	AT3G52330
OG0000004	AT3G52510
OG0000004	AT3G56670
OG0000004	AT3G56890
OG0000004	AT3G57580
OG0000004	AT3G57590
OG0000004	AT3G61340
OG0000004	AT4G09190
OG0000004	AT4G11590
OG0000004	AT4G13060
OG0000004	AT4G19930
OG0000004	AT4G19940
OG0000004	AT4G21240
OG0000004	AT4G29970
OG0000004	AT4G38870
OG0000004	AT5G15660
OG0000004	AT5G15670
OG0000004	AT5G18160
OG0000004	AT5G22791
OG0000004	AT5G38810
OG0000004	AT5G42430
OG0000004	AT5G43550
OG0000004	AT5G44220
OG0000004	AT5G44345
OG0000004	AT5G50220
OG0000004	AT5G52610
OG0000004	AT5G52620
OG0000004	AT5G62060
OG0000004	AT5G62510
OG0000004	AT5G62660
OG0000004	AT5G62860
OG0000004	AT5G65850
OG0000004	BdiBd21-3.3G0384100
OG0000004	TraesCS5D02G485600
OG0000005	AT1G11608
OG0000005	AT1G11620
OG0000005	AT1G11810
OG0000005	AT1G24800
OG0000005	AT1G24881
OG0000005	AT1G25055
OG0000005	AT1G25141
OG0000005	AT1G25150
OG0000005	AT1G25211
OG0000005	AT1G27490
OG0000005	AT1G32140
OG0000005	AT1G50470
OG0000005	AT1G54550
OG0000005	AT1G59680
OG0000005	AT1G62270
OG0000005	AT1G65990
OG0000005	AT1G66490
OG0000005	AT1G67450
OG0000005	AT1G67455
OG0000005	AT2G04920
OG0000005	AT2G07140
OG0000005	AT2G11200
OG0000005	AT2G17830
OG0000005	AT2G18780
OG0000005	AT2G24510
OG0000005	AT2G27520
OG0000005	AT2G33655
OG0000005	AT2G38590
OG0000005	AT3G03405
OG0000005	AT3G04250
OG0000005	AT3G08750
OG0000005	AT3G10430
OG0000005	AT3G13680
OG0000005	AT3G13820
OG0000005	AT3G13830
OG0000005	AT3G14030
OG0000005	AT3G16020
OG0000005	AT3G16740
OG0000005	AT3G16820
OG0000005	AT3G16880
OG0000005	AT3G17265
OG0000005	AT3G17270
OG0000005	AT3G17280
OG0000005	AT3G17320
OG0000005	AT3G17400
OG0000005	AT3G17480
OG0000005	AT3G17490
OG0000005	AT3G17500
OG0000005	AT3G17530
OG0000005	AT3G17540
OG0000005	AT3G17560
OG0000005	AT3G17570
OG0000005	AT3G17620
OG0000005	AT3G18120
OG0000005	AT3G18320
OG0000005	AT3G18330
OG0000005	AT3G18900
OG0000005	AT3G18910
OG0000005	AT3G18980
OG0000005	AT3G19410
OG0000005	AT3G19470
OG0000005	AT3G19560
OG0000005	AT3G19880
OG0000005	AT3G19890
OG0000005	AT3G20030
OG0000005	AT3G20400
OG0000005	AT3G20690
OG0000005	AT3G20700
OG0000005	AT3G20710
OG0000005	AT3G21120
OG0000005	AT3G21130
OG0000005	AT3G21170
OG0000005	AT3G22350
OG0000005	AT3G22421
OG0000005	AT3G22700
OG0000005	AT3G22710
OG0000005	AT3G22720
OG0000005	AT3G22730
OG0000005	AT3G22770
OG0000005	AT3G22870
OG0000005	AT3G22940
OG0000005	AT3G23260
OG0000005	AT3G23420
OG0000005	AT3G23633
OG0000005	AT3G23680
OG0000005	AT3G23685
OG0000005	AT3G24580
OG0000005	AT3G24700
OG0000005	AT3G25090
OG0000005	AT3G25460
OG0000005	AT3G44120
OG0000005	AT3G49510
OG0000005	AT3G49520
OG0000005	AT3G49980
OG0000005	AT4G04690
OG0000005	AT4G05080
OG0000005	AT4G09870
OG0000005	AT4G10190
OG0000005	AT4G10740
OG0000005	AT4G17200
OG0000005	AT4G33290
OG0000005	AT5G36190
OG0000005	AT5G36200
OG0000005	AT5G36730
OG0000005	AT5G36820
OG0000005	AT5G41490
OG0000005	AT5G41500
OG0000005	AT5G41510
OG0000005	AT5G42460
OG0000005	AT5G47300
OG0000005	AT5G51000
OG0000005	AT5G60560
OG0000005	AT5G62830
OG0000006	BdiBd21-3.1G0037300
OG0000006	BdiBd21-3.1G0111000
OG0000006	BdiBd21-3.1G0144600
OG0000006	BdiBd21-3.1G0151800
OG0000006	BdiBd21-3.1G0187000
OG0000006	BdiBd21-3.1G0327500
OG0000006	BdiBd21-3.1G0420200
OG0000006	BdiBd21-3.1G0440700
OG0000006	BdiBd21-3.1G0460400
OG0000006	BdiBd21-3.1G0532400
OG0000006	BdiBd21-3.1G0533500
OG0000006	BdiBd21-3.1G0561900
OG0000006	BdiBd21-3.1G0568900
OG0000006	BdiBd21-3.1G0573400
OG0000006	BdiBd21-3.1G0586200
OG0000006	BdiBd21-3.1G0682100
OG0000006	BdiBd21-3.1G0703200
OG0000006	BdiBd21-3.1G0716100
OG0000006	BdiBd21-3.1G0745200
OG0000006	BdiBd21-3.1G0764000
OG0000006	BdiBd21-3.1G0767600
OG0000006	BdiBd21-3.1G0776600
OG0000006	BdiBd21-3.1G0781000
OG0000006	BdiBd21-3.1G0787200
OG0000006	BdiBd21-3.1G0799300
OG0000006	BdiBd21-3.1G0813600
OG0000006	BdiBd21-3.1G0815000
OG0000006	BdiBd21-3.1G0846400
OG0000006	BdiBd21-3.1G0872400
OG0000006	BdiBd21-3.1G0879700
OG0000006	BdiBd21-3.1G0899000
OG0000006	BdiBd21-3.1G0910400
OG0000006	BdiBd21-3.1G0976100
OG0000006	BdiBd21-3.1G1044000
OG0000006	BdiBd21-3.2G0095900
OG0000006	BdiBd21-3.2G0108200
OG0000006	BdiBd21-3.2G0169000
OG0000006	BdiBd21-3.2G0169400
OG0000006	BdiBd21-3.2G0178100
OG0000006	BdiBd21-3.2G0199300
OG0000006	BdiBd21-3.2G0233000
OG0000006	BdiBd21-3.2G0251600
OG0000006	BdiBd21-3.2G0261100
OG0000006	BdiBd21-3.2G0332500
OG0000006	BdiBd21-3.2G0349600
OG0000006	BdiBd21-3.2G0353000
OG0000006	BdiBd21-3.2G0418300
OG0000006	BdiBd21-3.2G0437100
OG0000006	BdiBd21-3.2G0452800
OG0000006	BdiBd21-3.2G0454600
OG0000006	BdiBd21-3.2G0462000
OG0000006	BdiBd21-3.2G0515700
OG0000006	BdiBd21-3.2G0564000
OG0000006	BdiBd21-3.2G0654800
OG0000006	BdiBd21-3.3G0007900
OG0000006	BdiBd21-3.3G0070301
OG0000006	BdiBd21-3.3G0098200
OG0000006	BdiBd21-3.3G0123200
OG0000006	BdiBd21-3.3G0129300
OG0000006	BdiBd21-3.3G0151600
OG0000006	BdiBd21-3.3G0188000
OG0000006	BdiBd21-3.3G0205200
OG0000006	BdiBd21-3.3G0255100
OG0000006	BdiBd21-3.3G0258800
OG0000006	BdiBd21-3.3G0270100
OG0000006	BdiBd21-3.3G0325500
OG0000006	BdiBd21-3.3G0325700
OG0000006	BdiBd21-3.3G0358050
OG0000006	BdiBd21-3.3G0430900
OG0000006	BdiBd21-3.3G0547000
OG0000006	BdiBd21-3.3G0574100
OG0000006	BdiBd21-3.3G0576000
OG0000006	BdiBd21-3.3G0712900
OG0000006	BdiBd21-3.3G0760500
OG0000006	BdiBd21-3.3G0761600
OG0000006	BdiBd21-3.3G0779300
OG0000006	BdiBd21-3.4G0134500
OG0000006	BdiBd21-3.4G0140500
OG0000006	BdiBd21-3.4G0164300
OG0000006	BdiBd21-3.4G0166200
OG0000006	BdiBd21-3.4G0177550
OG0000006	BdiBd21-3.4G0191700
OG0000006	BdiBd21-3.4G0206200
OG0000006	BdiBd21-3.4G0261800
OG0000006	BdiBd21-3.4G0291300
OG0000006	BdiBd21-3.4G0293400
OG0000006	BdiBd21-3.4G0297300
OG0000006	BdiBd21-3.4G0311600
OG0000006	BdiBd21-3.4G0317900
OG0000006	BdiBd21-3.4G0350400
OG0000006	BdiBd21-3.4G0353300
OG0000006	BdiBd21-3.4G0378900
OG0000006	BdiBd21-3.4G0391400
OG0000006	BdiBd21-3.4G0417500
OG0000006	BdiBd21-3.4G0430700
OG0000006	BdiBd21-3.4G0467400
OG0000006	BdiBd21-3.4G0486200
OG0000006	BdiBd21-3.4G0525700
OG0000006	BdiBd21-3.5G0006100
OG0000006	BdiBd21-3.5G0038200
OG0000006	BdiBd21-3.5G0041500
OG0000006	BdiBd21-3.5G0045400
OG0000006	BdiBd21-3.5G0062500
OG0000006	BdiBd21-3.5G0093500
OG0000006	BdiBd21-3.5G0113100
OG0000006	BdiBd21-3.5G0242700
OG0000006	BdiBd21-3.5G0266500
OG0000007	TraesCS1B02G123300
OG0000007	TraesCS1B02G145900
OG0000007	TraesCS1B02G154900
OG0000007	TraesCS1B02G164600
OG0000007	TraesCS1B02G172300
OG0000007	TraesCS1B02G203700
OG0000007	TraesCS1B02G213500
OG0000007	TraesCS1B02G231100
OG0000007	TraesCS1B02G231700
OG0000007	TraesCS1B02G264100
OG0000007	TraesCS1B02G264800
OG0000007	TraesCS1B02G270500
OG0000007	TraesCS1B02G330300
OG0000007	TraesCS1D02G129300
OG0000007	TraesCS2A02G181700
OG0000007	TraesCS2A02G230600
OG0000007	TraesCS2A02G230800
OG0000007	TraesCS2A02G236000
OG0000007	TraesCS2A02G243700
OG0000007	TraesCS2A02G425300
OG0000007	TraesCS2B02G253800
OG0000007	TraesCS2B02G256500
OG0000007	TraesCS2B02G259200
OG0000007	TraesCS2B02G279900
OG0000007	TraesCS2B02G288900
OG0000007	TraesCS2B02G387400
OG0000007	TraesCS2B02G406300
OG0000007	TraesCS2B02G573100
OG0000007	TraesCS2D02G246300
OG0000007	TraesCS2D02G298700
OG0000007	TraesCS3B02G106300
OG0000007	TraesCS3B02G108900
OG0000007	TraesCS3B02G114700
OG0000007	TraesCS3B02G133300
OG0000007	TraesCS3B02G136900
OG0000007	TraesCS3B02G223100
OG0000007	TraesCS3B02G223700
OG0000007	TraesCS3B02G228600
OG0000007	TraesCS3B02G238900
OG0000007	TraesCS3B02G247100
OG0000007	TraesCS3B02G249900
OG0000007	TraesCS3B02G254300
OG0000007	TraesCS3B02G354600
OG0000007	TraesCS3B02G409500
OG0000007	TraesCS3B02G442500
OG0000007	TraesCS3D02G197600
OG0000007	TraesCS3D02G199700
OG0000007	TraesCS4A02G160500
OG0000007	TraesCS4A02G456500
OG0000007	TraesCS4B02G081300
OG0000007	TraesCS4B02G125200
OG0000007	TraesCS4B02G127000
OG0000007	TraesCS4B02G129500
OG0000007	TraesCS4B02G171700
OG0000007	TraesCS4B02G177600
OG0000007	TraesCS4B02G182800
OG0000007	TraesCS4B02G212800
OG0000007	TraesCS4B02G277400
OG0000007	TraesCS4B02G284300
OG0000007	TraesCS4B02G285900
OG0000007	TraesCS4D02G149900
OG0000007	TraesCS4D02G168000
OG0000007	TraesCS4D02G168100
OG0000007	TraesCS4D02G168200
OG0000007	TraesCS4D02G208000
OG0000007	TraesCS5A02G080500
OG0000007	TraesCS5A02G228700
OG0000007	TraesCS5B02G124500
OG0000007	TraesCS5B02G172100
OG0000007	TraesCS5B02G203500
OG0000007	TraesCS5B02G205100
OG0000007	TraesCS6A02G181800
OG0000007	TraesCS6A02G199200
OG0000007	TraesCS6A02G249600
OG0000007	TraesCS6B02G072600
OG0000007	TraesCS6B02G120800
OG0000007	TraesCS6B02G208800
OG0000007	TraesCS6B02G213400
OG0000007	TraesCS6B02G220400
OG0000007	TraesCS6B02G255700
OG0000007	TraesCS6B02G261600
OG0000007	TraesCS6B02G314100
OG0000007	TraesCS6B02G405300
OG0000007	TraesCS6D02G185400
OG0000007	TraesCS6D02G217700
OG0000007	TraesCS7A02G285300
OG0000007	TraesCS7A02G296700
OG0000007	TraesCS7A02G407100
OG0000007	TraesCS7B02G142900
OG0000007	TraesCS7B02G188300
OG0000007	TraesCS7B02G199600
OG0000007	TraesCS7B02G200100
OG0000007	TraesCS7B02G210300
OG0000007	TraesCS7B02G214200
OG0000007	TraesCS7B02G246400
OG0000007	TraesCS7B02G256800
OG0000007	TraesCS7B02G284000
OG0000007	TraesCS7B02G284100
OG0000007	TraesCS7B02G284200
OG0000007	TraesCS7B02G372800
OG0000007	TraesCS7D02G292200
OG0000007	TraesCSU02G052100
OG0000007	TraesCSU02G087800
OG0000007	TraesCSU02G088000
OG0000007	TraesCSU02G240300
OG0000007	TraesCSU02G244300
OG0000007	TraesCSU02G251800
OG0000008	BdiBd21-3.3G0561100
OG0000008	BdiBd21-3.3G0561200
OG0000008	BdiBd21-3.3G0561500
OG0000008	BdiBd21-3.3G0561600
OG0000008	BdiBd21-3.3G0561700
OG0000008	BdiBd21-3.3G0561800
OG0000008	BdiBd21-3.3G0561900
OG0000008	BdiBd21-3.3G0562201
OG0000008	BdiBd21-3.3G0562300
OG0000008	BdiBd21-3.3G0562400
OG0000008	BdiBd21-3.3G0562500
OG0000008	BdiBd21-3.3G0562600
OG0000008	BdiBd21-3.4G0068800
OG0000008	BdiBd21-3.4G0159500
OG0000008	BdiBd21-3.4G0159700
OG0000008	BdiBd21-3.4G0159800
OG0000008	BdiBd21-3.4G0354300
OG0000008	BdiBd21-3.4G0354500
OG0000008	BdiBd21-3.4G0354600
OG0000008	HORVU3Hr1G107420
OG0000008	HORVU3Hr1G107440
OG0000008	HORVU3Hr1G107450
OG0000008	HORVU3Hr1G107490
OG0000008	HORVU3Hr1G107500
OG0000008	HORVU3Hr1G107540
OG0000008	HORVU3Hr1G107560
OG0000008	HORVU3Hr1G107590
OG0000008	HORVU3Hr1G107600
OG0000008	HORVU3Hr1G107610
OG0000008	HORVU3Hr1G107620
OG0000008	HORVU3Hr1G107650
OG0000008	HORVU3Hr1G107660
OG0000008	HORVU3Hr1G107680
OG0000008	HORVU4Hr1G020580
OG0000008	HORVU4Hr1G020600
OG0000008	HORVU4Hr1G020630
OG0000008	HORVU4Hr1G020640
OG0000008	HORVU7Hr1G057780
OG0000008	HORVU7Hr1G057810
OG0000008	HORVU7Hr1G057840
OG0000008	HORVU7Hr1G057870
OG0000008	HORVU7Hr1G057970
OG0000008	TraesCS3B02G542400
OG0000008	TraesCS3B02G542600
OG0000008	TraesCS3B02G542800
OG0000008	TraesCS3B02G543200
OG0000008	TraesCS3D02G488200
OG0000008	TraesCS3D02G488500
OG0000008	TraesCS3D02G488600
OG0000008	TraesCS3D02G488700
OG0000008	TraesCS3D02G488900
OG0000008	TraesCS3D02G489000
OG0000008	TraesCS3D02G489200
OG0000008	TraesCS4A02G210300
OG0000008	TraesCS4A02G210500
OG0000008	TraesCS4A02G210600
OG0000008	TraesCS4B02G113700
OG0000008	TraesCS4B02G114100
OG0000008	TraesCS4D02G111500
OG0000008	TraesCS4D02G111700
OG0000008	TraesCS6A02G064100
OG0000008	TraesCS6A02G064200
OG0000008	TraesCS6A02G064300
OG0000008	TraesCS6A02G064400
OG0000008	TraesCS6A02G064500
OG0000008	TraesCS6A02G064900
OG0000008	TraesCS6A02G065000
OG0000008	TraesCS6B02G086300
OG0000008	TraesCS6B02G086900
OG0000008	TraesCS7A02G273800
OG0000008	TraesCS7A02G273900
OG0000008	TraesCS7A02G274000
OG0000008	TraesCS7A02G274100
OG0000008	TraesCS7A02G274200
OG0000008	TraesCS7A02G274300
OG0000008	TraesCS7A02G274400
OG0000008	TraesCS7A02G274600
OG0000008	TraesCS7A02G275000
OG0000008	TraesCS7B02G171600
OG0000008	TraesCS7B02G171700
OG0000008	TraesCS7B02G171900
OG0000008	TraesCS7B02G172000
OG0000008	TraesCS7B02G172100
OG0000008	TraesCS7B02G172300
OG0000008	TraesCS7B02G172400
OG0000008	TraesCS7B02G172600
OG0000008	TraesCS7B02G172700
OG0000008	TraesCS7B02G173100
OG0000008	TraesCS7B02G173200
OG0000008	TraesCS7B02G173400
OG0000008	TraesCS7D02G273700
OG0000008	TraesCS7D02G273800
OG0000008	TraesCS7D02G273900
OG0000008	TraesCS7D02G274000
OG0000008	TraesCS7D02G274100
OG0000008	TraesCS7D02G274300
OG0000008	TraesCS7D02G274400
OG0000008	TraesCS7D02G274500
OG0000008	TraesCS7D02G274600
OG0000008	TraesCS7D02G274700
OG0000008	TraesCS7D02G274900
OG0000008	TraesCS7D02G275300
OG0000008	TraesCS7D02G275500
OG0000008	TraesCSU02G118500
OG0000008	TraesCSU02G118600
OG0000008	TraesCSU02G118700
OG0000009	BdiBd21-3.2G0488800
OG0000009	BdiBd21-3.2G0489500
OG0000009	BdiBd21-3.2G0489750
OG0000009	BdiBd21-3.2G0489900
OG0000009	HORVU0Hr1G031920
OG0000009	HORVU1Hr1G010890
OG0000009	HORVU1Hr1G010970
OG0000009	HORVU1Hr1G011150
OG0000009	HORVU1Hr1G011160
OG0000009	HORVU1Hr1G011300
OG0000009	HORVU1Hr1G011400
OG0000009	HORVU1Hr1G013810
OG0000009	HORVU1Hr1G014060
OG0000009	HORVU2Hr1G105460
OG0000009	TraesCS1A02G054500
OG0000009	TraesCS1A02G054700
OG0000009	TraesCS1A02G054800
OG0000009	TraesCS1A02G055500
OG0000009	TraesCS1A02G055800
OG0000009	TraesCS1A02G056000
OG0000009	TraesCS1A02G056105
OG0000009	TraesCS1A02G057300
OG0000009	TraesCS1A02G057400
OG0000009	TraesCS1A02G066600
OG0000009	TraesCS1A02G067000
OG0000009	TraesCS1A02G067400
OG0000009	TraesCS1A02G067600
OG0000009	TraesCS1A02G067700
OG0000009	TraesCS1A02G072982
OG0000009	TraesCS1A02G073600
OG0000009	TraesCS1A02G073800
OG0000009	TraesCS1B02G038300
OG0000009	TraesCS1B02G039620
OG0000009	TraesCS1B02G071600
OG0000009	TraesCS1B02G071617
OG0000009	TraesCS1B02G071642
OG0000009	TraesCS1B02G072300
OG0000009	TraesCS1B02G072400
OG0000009	TraesCS1B02G072700
OG0000009	TraesCS1B02G072900
OG0000009	TraesCS1B02G073100
OG0000009	TraesCS1B02G073200
OG0000009	TraesCS1B02G074600
OG0000009	TraesCS1B02G075000
OG0000009	TraesCS1B02G084563
OG0000009	TraesCS1B02G084581
OG0000009	TraesCS1B02G085300
OG0000009	TraesCS1B02G085400
OG0000009	TraesCS1B02G085900
OG0000009	TraesCS1B02G086000
OG0000009	TraesCS1B02G092500
OG0000009	TraesCS1B02G092600
OG0000009	TraesCS1D02G055300
OG0000009	TraesCS1D02G055500
OG0000009	TraesCS1D02G056200
OG0000009	TraesCS1D02G056400
OG0000009	TraesCS1D02G056600
OG0000009	TraesCS1D02G056700
OG0000009	TraesCS1D02G057800
OG0000009	TraesCS1D02G058000
OG0000009	TraesCS1D02G058200
OG0000009	TraesCS1D02G058517
OG0000009	TraesCS1D02G067980
OG0000009	TraesCS1D02G068400
OG0000009	TraesCS1D02G068500
OG0000009	TraesCS1D02G068600
OG0000009	TraesCS1D02G068800
OG0000009	TraesCS1D02G068900
OG0000009	TraesCS1D02G069100
OG0000009	TraesCS1D02G075800
OG0000009	TraesCS1D02G076400
OG0000009	TraesCS1D02G076500
OG0000009	TraesCS1D02G076800
OG0000009	TraesCS1D02G076900
OG0000009	TraesCS1D02G095200
OG0000009	TraesCS2A02G478045
OG0000009	TraesCS2A02G526200
OG0000009	TraesCS2A02G530300
OG0000009	TraesCS2A02G530400
OG0000009	TraesCS2A02G530600
OG0000009	TraesCS2A02G530700
OG0000009	TraesCS2A02G531000
OG0000009	TraesCS2B02G559900
OG0000009	TraesCS2B02G560000
OG0000009	TraesCS2B02G560700
OG0000009	TraesCS2B02G560741
OG0000009	TraesCS2D02G477278
OG0000009	TraesCS2D02G532100
OG0000009	TraesCS2D02G532182
OG0000009	TraesCS2D02G532300
OG0000009	TraesCS2D02G532400
OG0000009	TraesCS2D02G532500
OG0000009	TraesCS2D02G532600
OG0000009	TraesCS2D02G533000
OG0000009	TraesCS6A02G099100
OG0000009	TraesCS6A02G099387
OG0000009	TraesCS6A02G099389
OG0000009	TraesCS6A02G311600
OG0000009	TraesCS6B02G127200
OG0000009	TraesCS6B02G127463
OG0000009	TraesCS6B02G127603
OG0000009	TraesCS6B02G341800
OG0000009	TraesCS6D02G089608
OG0000009	TraesCS6D02G290900
OG0000009	TraesCS7B02G372755
OG0000009	TraesCS7B02G469500
OG0000010	HORVU0Hr1G002620
OG0000010	HORVU0Hr1G003300
OG0000010	HORVU0Hr1G004740
OG0000010	HORVU0Hr1G013260
OG0000010	HORVU1Hr1G016470
OG0000010	HORVU1Hr1G033580
OG0000010	HORVU1Hr1G037710
OG0000010	HORVU1Hr1G039480
OG0000010	HORVU1Hr1G043670
OG0000010	HORVU1Hr1G055030
OG0000010	HORVU1Hr1G060110
OG0000010	HORVU1Hr1G077890
OG0000010	HORVU1Hr1G088130
OG0000010	HORVU1Hr1G093080
OG0000010	HORVU2Hr1G017710
OG0000010	HORVU2Hr1G027090
OG0000010	HORVU2Hr1G038660
OG0000010	HORVU2Hr1G044300
OG0000010	HORVU2Hr1G048790
OG0000010	HORVU2Hr1G051700
OG0000010	HORVU2Hr1G055650
OG0000010	HORVU2Hr1G056080
OG0000010	HORVU2Hr1G083180
OG0000010	HORVU2Hr1G083210
OG0000010	HORVU2Hr1G088890
OG0000010	HORVU2Hr1G097090
OG0000010	HORVU2Hr1G102420
OG0000010	HORVU2Hr1G107730
OG0000010	HORVU2Hr1G124520
OG0000010	HORVU3Hr1G008060
OG0000010	HORVU3Hr1G019120
OG0000010	HORVU3Hr1G024700
OG0000010	HORVU3Hr1G025160
OG0000010	HORVU3Hr1G036740
OG0000010	HORVU3Hr1G037870
OG0000010	HORVU3Hr1G046440
OG0000010	HORVU3Hr1G061250
OG0000010	HORVU3Hr1G061340
OG0000010	HORVU3Hr1G107720
OG0000010	HORVU3Hr1G109090
OG0000010	HORVU3Hr1G110040
OG0000010	HORVU4Hr1G007500
OG0000010	HORVU4Hr1G009600
OG0000010	HORVU4Hr1G013770
OG0000010	HORVU4Hr1G024880
OG0000010	HORVU4Hr1G027840
OG0000010	HORVU4Hr1G034600
OG0000010	HORVU4Hr1G034610
OG0000010	HORVU4Hr1G047210
OG0000010	HORVU4Hr1G054750
OG0000010	HORVU4Hr1G055760
OG0000010	HORVU5Hr1G001830
OG0000010	HORVU5Hr1G019810
OG0000010	HORVU5Hr1G020670
OG0000010	HORVU5Hr1G022410
OG0000010	HORVU5Hr1G033800
OG0000010	HORVU5Hr1G036410
OG0000010	HORVU5Hr1G036540
OG0000010	HORVU5Hr1G036550
OG0000010	HORVU5Hr1G040770
OG0000010	HORVU5Hr1G041790
OG0000010	HORVU5Hr1G043890
OG0000010	HORVU5Hr1G050190
OG0000010	HORVU5Hr1G050730
OG0000010	HORVU5Hr1G053110
OG0000010	HORVU5Hr1G057820
OG0000010	HORVU5Hr1G061210
OG0000010	HORVU5Hr1G068700
OG0000010	HORVU5Hr1G075080
OG0000010	HORVU5Hr1G087430
OG0000010	HORVU6Hr1G026430
OG0000010	HORVU6Hr1G026850
OG0000010	HORVU6Hr1G038040
OG0000010	HORVU6Hr1G042700
OG0000010	HORVU6Hr1G045590
OG0000010	HORVU6Hr1G045600
OG0000010	HORVU6Hr1G045810
OG0000010	HORVU6Hr1G051370
OG0000010	HORVU6Hr1G051380
OG0000010	HORVU6Hr1G051590
OG0000010	HORVU6Hr1G053300
OG0000010	HORVU6Hr1G055130
OG0000010	HORVU7Hr1G025100
OG0000010	HORVU7Hr1G031010
OG0000010	HORVU7Hr1G042750
OG0000010	HORVU7Hr1G049230
OG0000010	HORVU7Hr1G053810
OG0000010	HORVU7Hr1G056330
OG0000010	HORVU7Hr1G057940
OG0000010	HORVU7Hr1G058540
OG0000010	HORVU7Hr1G063550
OG0000010	HORVU7Hr1G064260
OG0000010	HORVU7Hr1G071150
OG0000010	HORVU7Hr1G072300
OG0000010	HORVU7Hr1G072800
OG0000010	HORVU7Hr1G073680
OG0000010	HORVU7Hr1G082740
OG0000010	HORVU7Hr1G085880
OG0000010	HORVU7Hr1G085990
OG0000010	TraesCS2A02G239400
OG0000011	HORVU1Hr1G073120
OG0000011	HORVU7Hr1G027730
OG0000011	TraesCS1A02G392700
OG0000011	TraesCS1B02G055500
OG0000011	TraesCS1B02G199800
OG0000011	TraesCS1B02G324800
OG0000011	TraesCS1D02G212000
OG0000011	TraesCS1D02G448500
OG0000011	TraesCS2A02G248900
OG0000011	TraesCS2A02G357300
OG0000011	TraesCS2A02G519200
OG0000011	TraesCS2A02G589800
OG0000011	TraesCS2B02G077000
OG0000011	TraesCS2B02G084700
OG0000011	TraesCS2B02G165900
OG0000011	TraesCS2B02G269100
OG0000011	TraesCS2B02G408200
OG0000011	TraesCS2B02G416800
OG0000011	TraesCS2B02G454700
OG0000011	TraesCS2B02G523000
OG0000011	TraesCS2D02G578400
OG0000011	TraesCS3A02G042000
OG0000011	TraesCS3A02G072800
OG0000011	TraesCS3A02G106000
OG0000011	TraesCS3A02G154100
OG0000011	TraesCS3A02G190400
OG0000011	TraesCS3A02G385800
OG0000011	TraesCS3B02G033600
OG0000011	TraesCS3B02G034000
OG0000011	TraesCS3B02G055500
OG0000011	TraesCS3B02G130800
OG0000011	TraesCS3B02G172500
OG0000011	TraesCS3B02G176300
OG0000011	TraesCS3D02G109200
OG0000011	TraesCS4A02G215900
OG0000011	TraesCS4A02G387300
OG0000011	TraesCS4A02G426600
OG0000011	TraesCS4A02G444400
OG0000011	TraesCS4A02G477100
OG0000011	TraesCS4B02G077300
OG0000011	TraesCS4B02G183200
OG0000011	TraesCS4B02G359400
OG0000011	TraesCS4B02G365900
OG0000011	TraesCS4B02G370100
OG0000011	TraesCS4B02G384900
OG0000011	TraesCS5A02G133700
OG0000011	TraesCS5A02G395000
OG0000011	TraesCS5A02G419100
OG0000011	TraesCS5B02G017200
OG0000011	TraesCS5B02G032100
OG0000011	TraesCS5B02G161300
OG0000011	TraesCS5B02G194500
OG0000011	TraesCS5B02G245200
OG0000011	TraesCS5B02G250900
OG0000011	TraesCS5B02G279100
OG0000011	TraesCS5B02G309400
OG0000011	TraesCS5B02G369600
OG0000011	TraesCS5B02G467300
OG0000011	TraesCS5B02G486800
OG0000011	TraesCS5D02G207600
OG0000011	TraesCS5D02G426800
OG0000011	TraesCS5D02G551000
OG0000011	TraesCS6A02G107000
OG0000011	TraesCS6A02G110700
OG0000011	TraesCS6A02G152900
OG0000011	TraesCS6A02G212900
OG0000011	TraesCS6A02G252200
OG0000011	TraesCS6A02G284900
OG0000011	TraesCS6B02G231500
OG0000011	TraesCS6B02G241900
OG0000011	TraesCS6B02G329100
OG0000011	TraesCS6B02G386300
OG0000011	TraesCS6D02G001900
OG0000011	TraesCS7A02G017000
OG0000011	TraesCS7A02G037800
OG0000011	TraesCS7A02G180400
OG0000011	TraesCS7A02G223200
OG0000011	TraesCS7A02G449700
OG0000011	TraesCS7A02G512000
OG0000011	TraesCS7B02G028800
OG0000011	TraesCS7B02G035000
OG0000011	TraesCS7B02G084200
OG0000011	TraesCS7B02G087700
OG0000011	TraesCS7B02G114800
OG0000011	TraesCS7B02G168400
OG0000011	TraesCS7B02G324600
OG0000011	TraesCS7B02G417200
OG0000011	TraesCS7B02G418700
OG0000011	TraesCS7B02G442500
OG0000011	TraesCS7B02G442700
OG0000011	TraesCS7B02G452200
OG0000011	TraesCSU02G141400
OG0000011	TraesCSU02G153600
OG0000011	TraesCSU02G267400
OG0000012	AT1G09200
OG0000012	AT1G13370
OG0000012	AT1G19890
OG0000012	AT1G75600
OG0000012	AT3G27360
OG0000012	AT4G40030
OG0000012	AT4G40040
OG0000012	AT5G10390
OG0000012	AT5G10400
OG0000012	AT5G10980
OG0000012	AT5G65350
OG0000012	AT5G65360
OG0000012	BdiBd21-3.1G0663000
OG0000012	BdiBd21-3.1G0663100
OG0000012	BdiBd21-3.1G0674600
OG0000012	BdiBd21-3.2G0241900
OG0000012	BdiBd21-3.2G0318200
OG0000012	BdiBd21-3.2G0370600
OG0000012	BdiBd21-3.3G0180700
OG0000012	BdiBd21-3.3G0276100
OG0000012	BdiBd21-3.3G0276200
OG0000012	BdiBd21-3.3G0601500
OG0000012	BdiBd21-3.4G0107400
OG0000012	BdiBd21-3.5G0149800
OG0000012	HORVU1Hr1G017800
OG0000012	HORVU1Hr1G020050
OG0000012	HORVU1Hr1G020070
OG0000012	HORVU1Hr1G022400
OG0000012	HORVU1Hr1G073670
OG0000012	HORVU2Hr1G079550
OG0000012	HORVU2Hr1G079560
OG0000012	HORVU3Hr1G063270
OG0000012	HORVU4Hr1G073150
OG0000012	HORVU5Hr1G109790
OG0000012	HORVU6Hr1G007470
OG0000012	HORVU7Hr1G024990
OG0000012	HORVU7Hr1G025160
OG0000012	HORVU7Hr1G025200
OG0000012	HORVU7Hr1G025330
OG0000012	HORVU7Hr1G029190
OG0000012	HORVU7Hr1G033030
OG0000012	HORVU7Hr1G034470
OG0000012	HORVU7Hr1G100450
OG0000012	HORVU7Hr1G100690
OG0000012	TraesCS1A02G261900
OG0000012	TraesCS1A02G274300
OG0000012	TraesCS1A02G360000
OG0000012	TraesCS1A02G361700
OG0000012	TraesCS1B02G283700
OG0000012	TraesCS1B02G375900
OG0000012	TraesCS1B02G376300
OG0000012	TraesCS1B02G376700
OG0000012	TraesCS1B02G378600
OG0000012	TraesCS1D02G274300
OG0000012	TraesCS1D02G364200
OG0000012	TraesCS1D02G366600
OG0000012	TraesCS2A02G318900
OG0000012	TraesCS2B02G337200
OG0000012	TraesCS2D02G297000
OG0000012	TraesCS3A02G377400
OG0000012	TraesCS3B02G299200
OG0000012	TraesCS3B02G410200
OG0000012	TraesCS3D02G370500
OG0000012	TraesCS4A02G030300
OG0000012	TraesCS4A02G057500
OG0000012	TraesCS4A02G421500
OG0000012	TraesCS4A02G421900
OG0000012	TraesCS4A02G423800
OG0000012	TraesCS4D02G274000
OG0000012	TraesCS5B02G529700
OG0000012	TraesCS6A02G063400
OG0000012	TraesCS6B02G081800
OG0000012	TraesCS7A02G067800
OG0000012	TraesCS7A02G102900
OG0000012	TraesCS7A02G103900
OG0000012	TraesCS7A02G119400
OG0000012	TraesCS7A02G158300
OG0000012	TraesCS7A02G442900
OG0000012	TraesCS7B02G016900
OG0000012	TraesCS7B02G017400
OG0000012	TraesCS7B02G062700
OG0000012	TraesCS7B02G063000
OG0000012	TraesCS7B02G341600
OG0000012	TraesCS7D02G061500
OG0000012	TraesCS7D02G061900
OG0000012	TraesCS7D02G116900
OG0000012	TraesCS7D02G158900
OG0000012	TraesCS7D02G159300
OG0000012	TraesCS7D02G432000
OG0000012	TraesCSU02G092100
OG0000012	TraesCSU02G093200
OG0000012	TraesCSU02G182300
OG0000012	TraesCSU02G229800
OG0000013	AT4G20820
OG0000013	AT4G20860
OG0000013	AT5G44360
OG0000013	AT5G44410
OG0000013	AT5G44440
OG0000013	BdiBd21-3.1G0519800
OG0000013	BdiBd21-3.1G0519900
OG0000013	BdiBd21-3.1G0520000
OG0000013	BdiBd21-3.3G0125800
OG0000013	BdiBd21-3.3G0462500
OG0000013	BdiBd21-3.5G0036900
OG0000013	BdiBd21-3.5G0037900
OG0000013	BdiBd21-3.5G0038100
OG0000013	BdiBd21-3.5G0226700
OG0000013	HORVU1Hr1G092680
OG0000013	HORVU2Hr1G008270
OG0000013	HORVU2Hr1G008300
OG0000013	HORVU2Hr1G008310
OG0000013	HORVU2Hr1G008330
OG0000013	HORVU2Hr1G021650
OG0000013	HORVU2Hr1G122590
OG0000013	HORVU4Hr1G017270
OG0000013	HORVU4Hr1G086520
OG0000013	HORVU7Hr1G089160
OG0000013	HORVU7Hr1G089190
OG0000013	HORVU7Hr1G089210
OG0000013	HORVU7Hr1G089250
OG0000013	HORVU7Hr1G089260
OG0000013	HORVU7Hr1G089270
OG0000013	HORVU7Hr1G089280
OG0000013	HORVU7Hr1G093940
OG0000013	TraesCS1B02G469800
OG0000013	TraesCS2A02G051500
OG0000013	TraesCS2A02G052600
OG0000013	TraesCS2A02G052700
OG0000013	TraesCS2A02G052800
OG0000013	TraesCS2A02G052900
OG0000013	TraesCS2A02G123200
OG0000013	TraesCS2A02G123400
OG0000013	TraesCS2A02G542600
OG0000013	TraesCS2B02G066400
OG0000013	TraesCS2B02G066800
OG0000013	TraesCS2B02G066900
OG0000013	TraesCS2B02G145300
OG0000013	TraesCS2B02G145500
OG0000013	TraesCS2B02G172300
OG0000013	TraesCS2B02G572400
OG0000013	TraesCS2D02G052300
OG0000013	TraesCS2D02G052500
OG0000013	TraesCS2D02G052700
OG0000013	TraesCS2D02G126200
OG0000013	TraesCS2D02G126400
OG0000013	TraesCS2D02G151500
OG0000013	TraesCS2D02G543700
OG0000013	TraesCS3B02G070000
OG0000013	TraesCS4A02G212100
OG0000013	TraesCS4B02G104000
OG0000013	TraesCS4B02G358600
OG0000013	TraesCS4D02G101000
OG0000013	TraesCS5A02G261400
OG0000013	TraesCS5B02G302700
OG0000013	TraesCS5D02G268800
OG0000013	TraesCS5D02G309100
OG0000013	TraesCS7A02G126600
OG0000013	TraesCS7A02G353700
OG0000013	TraesCS7A02G353800
OG0000013	TraesCS7A02G353900
OG0000013	TraesCS7A02G354000
OG0000013	TraesCS7A02G354100
OG0000013	TraesCS7A02G400100
OG0000013	TraesCS7A02G484600
OG0000013	TraesCS7B02G026000
OG0000013	TraesCS7B02G273500
OG0000013	TraesCS7B02G273600
OG0000013	TraesCS7B02G273700
OG0000013	TraesCS7B02G273800
OG0000013	TraesCS7B02G273900
OG0000013	TraesCS7B02G300200
OG0000013	TraesCS7B02G388200
OG0000013	TraesCS7D02G124500
OG0000013	TraesCS7D02G368500
OG0000013	TraesCS7D02G368700
OG0000013	TraesCS7D02G368800
OG0000013	TraesCS7D02G369000
OG0000013	TraesCS7D02G369100
OG0000013	TraesCS7D02G369200
OG0000013	TraesCS7D02G393900
OG0000013	TraesCS7D02G472000
OG0000014	AT1G17600
OG0000014	AT1G17610
OG0000014	AT1G27170
OG0000014	AT1G27180
OG0000014	AT1G31540
OG0000014	AT1G56510
OG0000014	AT1G56520
OG0000014	AT1G56540
OG0000014	AT1G57630
OG0000014	AT1G57650
OG0000014	AT1G63730
OG0000014	AT1G63740
OG0000014	AT1G63750
OG0000014	AT1G63860
OG0000014	AT1G63870
OG0000014	AT1G63880
OG0000014	AT1G64070
OG0000014	AT1G65850
OG0000014	AT1G66090
OG0000014	AT1G69550
OG0000014	AT1G72840
OG0000014	AT1G72850
OG0000014	AT1G72860
OG0000014	AT1G72870
OG0000014	AT2G14080
OG0000014	AT2G16870
OG0000014	AT2G17055
OG0000014	AT2G20142
OG0000014	AT3G04210
OG0000014	AT3G04220
OG0000014	AT3G25510
OG0000014	AT3G44400
OG0000014	AT3G44480
OG0000014	AT3G44630
OG0000014	AT3G44670
OG0000014	AT4G04110
OG0000014	AT4G08450
OG0000014	AT4G09360
OG0000014	AT4G09420
OG0000014	AT4G09430
OG0000014	AT4G11170
OG0000014	AT4G14370
OG0000014	AT4G16860
OG0000014	AT4G16880
OG0000014	AT4G16890
OG0000014	AT4G16900
OG0000014	AT4G16920
OG0000014	AT4G16930
OG0000014	AT4G16940
OG0000014	AT4G16950
OG0000014	AT4G16960
OG0000014	AT4G16990
OG0000014	AT4G19500
OG0000014	AT5G11250
OG0000014	AT5G17680
OG0000014	AT5G17970
OG0000014	AT5G18350
OG0000014	AT5G18360
OG0000014	AT5G18370
OG0000014	AT5G22690
OG0000014	AT5G36930
OG0000014	AT5G38340
OG0000014	AT5G38344
OG0000014	AT5G38350
OG0000014	AT5G38850
OG0000014	AT5G40060
OG0000014	AT5G40090
OG0000014	AT5G40100
OG0000014	AT5G40910
OG0000014	AT5G41540
OG0000014	AT5G41550
OG0000014	AT5G41740
OG0000014	AT5G41750
OG0000014	AT5G44510
OG0000014	AT5G46260
OG0000014	AT5G46270
OG0000014	AT5G46450
OG0000014	AT5G46470
OG0000014	AT5G46490
OG0000014	AT5G46500
OG0000014	AT5G46510
OG0000014	AT5G46520
OG0000014	AT5G48770
OG0000014	AT5G48780
OG0000014	AT5G49140
OG0000014	AT5G51630
OG0000014	AT5G58120
OG0000015	BdiBd21-3.1G0125700
OG0000015	BdiBd21-3.1G0142900
OG0000015	BdiBd21-3.1G0186700
OG0000015	BdiBd21-3.1G0215200
OG0000015	BdiBd21-3.1G0248600
OG0000015	BdiBd21-3.1G0384200
OG0000015	BdiBd21-3.1G0418700
OG0000015	BdiBd21-3.1G0434800
OG0000015	BdiBd21-3.1G0505200
OG0000015	BdiBd21-3.1G0517800
OG0000015	BdiBd21-3.1G0574300
OG0000015	BdiBd21-3.1G0592700
OG0000015	BdiBd21-3.1G0637800
OG0000015	BdiBd21-3.1G0745100
OG0000015	BdiBd21-3.1G0755001
OG0000015	BdiBd21-3.1G0826100
OG0000015	BdiBd21-3.1G0847400
OG0000015	BdiBd21-3.1G0854150
OG0000015	BdiBd21-3.1G0907100
OG0000015	BdiBd21-3.2G0014300
OG0000015	BdiBd21-3.2G0031200
OG0000015	BdiBd21-3.2G0036300
OG0000015	BdiBd21-3.2G0083500
OG0000015	BdiBd21-3.2G0148200
OG0000015	BdiBd21-3.2G0220400
OG0000015	BdiBd21-3.2G0242900
OG0000015	BdiBd21-3.2G0267600
OG0000015	BdiBd21-3.2G0269600
OG0000015	BdiBd21-3.2G0277000
OG0000015	BdiBd21-3.2G0311900
OG0000015	BdiBd21-3.2G0352400
OG0000015	BdiBd21-3.2G0381200
OG0000015	BdiBd21-3.2G0402100
OG0000015	BdiBd21-3.2G0413500
OG0000015	BdiBd21-3.2G0435400
OG0000015	BdiBd21-3.2G0516800
OG0000015	BdiBd21-3.2G0586500
OG0000015	BdiBd21-3.2G0609800
OG0000015	BdiBd21-3.2G0616000
OG0000015	BdiBd21-3.2G0707600
OG0000015	BdiBd21-3.3G0105400
OG0000015	BdiBd21-3.3G0119232
OG0000015	BdiBd21-3.3G0158300
OG0000015	BdiBd21-3.3G0178400
OG0000015	BdiBd21-3.3G0229500
OG0000015	BdiBd21-3.3G0257200
OG0000015	BdiBd21-3.3G0303400
OG0000015	BdiBd21-3.3G0304800
OG0000015	BdiBd21-3.3G0315300
OG0000015	BdiBd21-3.3G0318850
OG0000015	BdiBd21-3.3G0361700
OG0000015	BdiBd21-3.3G0432400
OG0000015	BdiBd21-3.3G0501000
OG0000015	BdiBd21-3.3G0541200
OG0000015	BdiBd21-3.3G0544400
OG0000015	BdiBd21-3.3G0599200
OG0000015	BdiBd21-3.3G0640700
OG0000015	BdiBd21-3.3G0644900
OG0000015	BdiBd21-3.3G0671200
OG0000015	BdiBd21-3.4G0219500
OG0000015	BdiBd21-3.4G0237550
OG0000015	BdiBd21-3.4G0239500
OG0000015	BdiBd21-3.4G0252000
OG0000015	BdiBd21-3.4G0279300
OG0000015	BdiBd21-3.4G0286200
OG0000015	BdiBd21-3.4G0287700
OG0000015	BdiBd21-3.4G0298000
OG0000015	BdiBd21-3.4G0350200
OG0000015	BdiBd21-3.4G0377600
OG0000015	BdiBd21-3.4G0450100
OG0000015	BdiBd21-3.4G0487800
OG0000015	BdiBd21-3.4G0490900
OG0000015	BdiBd21-3.4G0501700
OG0000015	BdiBd21-3.4G0505000
OG0000015	BdiBd21-3.4G0575900
OG0000015	BdiBd21-3.5G0042000
OG0000015	BdiBd21-3.5G0042266
OG0000015	BdiBd21-3.5G0059300
OG0000015	BdiBd21-3.5G0089700
OG0000015	BdiBd21-3.5G0090200
OG0000015	BdiBd21-3.5G0128300
OG0000015	BdiBd21-3.5G0194100
OG0000015	BdiBd21-3.5G0199400
OG0000015	BdiBd21-3.5G0252000
OG0000015	BdiBd21-3.5G0258200
OG0000016	AT1G17240
OG0000016	AT1G17250
OG0000016	AT1G72300
OG0000016	BdiBd21-3.1G0451900
OG0000016	BdiBd21-3.3G0053500
OG0000016	BdiBd21-3.3G0053600
OG0000016	BdiBd21-3.3G0053700
OG0000016	BdiBd21-3.3G0053800
OG0000016	BdiBd21-3.3G0054200
OG0000016	BdiBd21-3.3G0054400
OG0000016	BdiBd21-3.3G0055700
OG0000016	HORVU0Hr1G015280
OG0000016	HORVU0Hr1G031790
OG0000016	HORVU2Hr1G046130
OG0000016	HORVU2Hr1G055170
OG0000016	HORVU3Hr1G061440
OG0000016	HORVU4Hr1G006450
OG0000016	HORVU4Hr1G006540
OG0000016	HORVU4Hr1G023740
OG0000016	HORVU4Hr1G080720
OG0000016	HORVU5Hr1G070330
OG0000016	HORVU6Hr1G018240
OG0000016	HORVU6Hr1G022420
OG0000016	HORVU6Hr1G023090
OG0000016	HORVU6Hr1G023100
OG0000016	HORVU6Hr1G023210
OG0000016	HORVU6Hr1G023290
OG0000016	HORVU6Hr1G023340
OG0000016	HORVU6Hr1G023370
OG0000016	HORVU6Hr1G023730
OG0000016	HORVU6Hr1G023770
OG0000016	HORVU6Hr1G031910
OG0000016	HORVU6Hr1G059580
OG0000016	HORVU7Hr1G037520
OG0000016	HORVU7Hr1G050010
OG0000016	HORVU7Hr1G094290
OG0000016	HORVU7Hr1G099550
OG0000016	TraesCS6A02G124300
OG0000016	TraesCS6A02G124500
OG0000016	TraesCS6A02G124600
OG0000016	TraesCS6A02G124700
OG0000016	TraesCS6A02G124800
OG0000016	TraesCS6A02G124900
OG0000016	TraesCS6A02G125000
OG0000016	TraesCS6A02G125200
OG0000016	TraesCS6A02G125300
OG0000016	TraesCS6A02G125400
OG0000016	TraesCS6A02G125500
OG0000016	TraesCS6A02G125600
OG0000016	TraesCS6A02G126400
OG0000016	TraesCS6A02G127500
OG0000016	TraesCS6A02G130000
OG0000016	TraesCS6B02G152300
OG0000016	TraesCS6B02G152700
OG0000016	TraesCS6B02G152800
OG0000016	TraesCS6B02G152900
OG0000016	TraesCS6B02G153100
OG0000016	TraesCS6B02G153300
OG0000016	TraesCS6B02G153400
OG0000016	TraesCS6B02G153500
OG0000016	TraesCS6B02G153700
OG0000016	TraesCS6B02G154300
OG0000016	TraesCS6B02G158400
OG0000016	TraesCS6D02G114800
OG0000016	TraesCS6D02G115100
OG0000016	TraesCS6D02G115200
OG0000016	TraesCS6D02G115300
OG0000016	TraesCS6D02G115400
OG0000016	TraesCS6D02G115700
OG0000016	TraesCS6D02G115800
OG0000016	TraesCS6D02G115900
OG0000016	TraesCS6D02G116000
OG0000016	TraesCS6D02G116100
OG0000016	TraesCS6D02G116500
OG0000016	TraesCS6D02G116700
OG0000016	TraesCS6D02G116800
OG0000016	TraesCS7A02G408300
OG0000016	TraesCS7A02G435300
OG0000016	TraesCS7A02G452500
OG0000016	TraesCS7B02G335000
OG0000016	TraesCS7D02G401700
OG0000016	TraesCS7D02G425500
OG0000016	TraesCS7D02G425600
OG0000016	TraesCS7D02G426000
OG0000016	TraesCS7D02G441600
OG0000017	AT5G49610
OG0000017	BdiBd21-3.1G0428400
OG0000017	BdiBd21-3.1G0428900
OG0000017	BdiBd21-3.1G0429000
OG0000017	BdiBd21-3.1G0429200
OG0000017	BdiBd21-3.1G0628400
OG0000017	BdiBd21-3.1G0844000
OG0000017	BdiBd21-3.1G0844100
OG0000017	BdiBd21-3.2G0244600
OG0000017	BdiBd21-3.2G0470766
OG0000017	BdiBd21-3.2G0470832
OG0000017	BdiBd21-3.2G0471301
OG0000017	BdiBd21-3.3G0343600
OG0000017	BdiBd21-3.3G0345500
OG0000017	BdiBd21-3.3G0587300
OG0000017	BdiBd21-3.3G0736300
OG0000017	HORVU1Hr1G002290
OG0000017	HORVU1Hr1G086180
OG0000017	HORVU2Hr1G020810
OG0000017	HORVU2Hr1G098990
OG0000017	HORVU2Hr1G099030
OG0000017	HORVU5Hr1G067280
OG0000017	HORVU6Hr1G064040
OG0000017	HORVU7Hr1G002670
OG0000017	HORVU7Hr1G101830
OG0000017	HORVU7Hr1G119040
OG0000017	TraesCS1A02G012400
OG0000017	TraesCS1A02G014200
OG0000017	TraesCS1A02G036400
OG0000017	TraesCS1A02G036500
OG0000017	TraesCS1A02G037100
OG0000017	TraesCS1A02G408400
OG0000017	TraesCS1A02G408600
OG0000017	TraesCS1B02G437200
OG0000017	TraesCS1B02G437300
OG0000017	TraesCS1D02G012200
OG0000017	TraesCS1D02G037800
OG0000017	TraesCS1D02G038100
OG0000017	TraesCS1D02G415400
OG0000017	TraesCS1D02G415500
OG0000017	TraesCS1D02G415600
OG0000017	TraesCS1D02G415700
OG0000017	TraesCS2B02G441300
OG0000017	TraesCS2B02G441500
OG0000017	TraesCS2D02G419200
OG0000017	TraesCS2D02G419300
[truncated: 180,210 more rows]
