# Supplementary material for: Identification of Candidate Susceptibility Genes to Puccinia graminis f. sp. tritici in Wheat
Source: Front Plant Sci. 2021 Apr 21;12:657796. doi: 10.3389/fpls.2021.657796 (PMC8097158; doi:10.3389/fpls.2021.657796)
Supplement: Supplementary file 5 [file Table_5.XLSX]

## Sheet: table_S5
Table S5. List of singleton orthogroups.
Orthogroup number	Gene ID
OG0029421	BdiBd21-3.4G0354550
OG0029422	BdiBd21-3.4G0039800
OG0029423	BdiBd21-3.4G0115650
OG0029424	BdiBd21-3.4G0441900
OG0029425	BdiBd21-3.4G0612432
OG0029426	BdiBd21-3.4G0046600
OG0029427	BdiBd21-3.4G0031700
OG0029428	BdiBd21-3.4G0056475
OG0029429	BdiBd21-3.4G0292550
OG0029430	BdiBd21-3.4G0560900
OG0029431	BdiBd21-3.4G0323500
OG0029432	BdiBd21-3.4G0172850
OG0029433	BdiBd21-3.4G0089800
OG0029434	BdiBd21-3.4G0065200
OG0029435	BdiBd21-3.4G0133251
OG0029436	BdiBd21-3.4G0361800
OG0029437	BdiBd21-3.4G0456300
OG0029438	BdiBd21-3.4G0446750
OG0029439	BdiBd21-3.4G0613200
OG0029440	BdiBd21-3.4G0325966
OG0029441	BdiBd21-3.4G0546000
OG0029442	BdiBd21-3.4G0048200
OG0029443	BdiBd21-3.4G0241000
OG0029444	BdiBd21-3.4G0070451
OG0029445	BdiBd21-3.4G0169650
OG0029446	BdiBd21-3.4G0535250
OG0029447	BdiBd21-3.4G0231550
OG0029448	BdiBd21-3.4G0047850
OG0029449	BdiBd21-3.4G0130401
OG0029450	BdiBd21-3.4G0224000
OG0029451	BdiBd21-3.4G0483600
OG0029452	BdiBd21-3.4G0545800
OG0029453	BdiBd21-3.4G0251700
OG0029454	BdiBd21-3.4G0565100
OG0029455	BdiBd21-3.4G0415150
OG0029456	BdiBd21-3.4G0277700
OG0029457	BdiBd21-3.4G0127350
OG0029458	BdiBd21-3.4G0604750
OG0029459	BdiBd21-3.4G0229100
OG0029460	BdiBd21-3.4G0202966
OG0029461	BdiBd21-3.4G0064400
OG0029462	BdiBd21-3.4G0066200
OG0029463	BdiBd21-3.4G0148501
OG0029464	BdiBd21-3.4G0502433
OG0029465	BdiBd21-3.4G0264250
OG0029466	BdiBd21-3.4G0287000
OG0029467	BdiBd21-3.4G0096550
OG0029468	BdiBd21-3.4G0390800
OG0029469	BdiBd21-3.4G0397600
OG0029470	BdiBd21-3.4G0090200
OG0029471	BdiBd21-3.4G0303300
OG0029472	BdiBd21-3.4G0261600
OG0029473	BdiBd21-3.4G0446200
OG0029474	BdiBd21-3.4G0410250
OG0029475	BdiBd21-3.4G0320300
OG0029476	BdiBd21-3.4G0113580
OG0029477	BdiBd21-3.4G0167400
OG0029478	BdiBd21-3.4G0241301
OG0029479	BdiBd21-3.4G0431001
OG0029480	BdiBd21-3.4G0043400
OG0029481	BdiBd21-3.4G0115300
OG0029482	BdiBd21-3.4G0051566
OG0029483	BdiBd21-3.4G0115200
OG0029484	BdiBd21-3.4G0578501
OG0029485	BdiBd21-3.4G0422000
OG0029486	BdiBd21-3.4G0108700
OG0029487	BdiBd21-3.4G0280300
OG0029488	BdiBd21-3.4G0354250
OG0029489	BdiBd21-3.4G0086500
OG0029490	BdiBd21-3.4G0208600
OG0029491	BdiBd21-3.4G0261450
OG0029492	BdiBd21-3.4G0256100
OG0029493	BdiBd21-3.4G0190300
OG0029494	BdiBd21-3.4G0363300
OG0029495	BdiBd21-3.4G0285300
OG0029496	BdiBd21-3.4G0553300
OG0029497	BdiBd21-3.4G0117400
OG0029498	BdiBd21-3.4G0387400
OG0029499	BdiBd21-3.4G0253601
OG0029500	BdiBd21-3.4G0152100
OG0029501	BdiBd21-3.4G0296700
OG0029502	BdiBd21-3.4G0417350
OG0029503	BdiBd21-3.4G0203150
OG0029504	BdiBd21-3.4G0508400
OG0029505	BdiBd21-3.4G0372350
OG0029506	BdiBd21-3.4G0244100
OG0029507	BdiBd21-3.4G0445901
OG0029508	BdiBd21-3.4G0393200
OG0029509	BdiBd21-3.4G0097400
OG0029510	BdiBd21-3.4G0215650
OG0029511	BdiBd21-3.4G0607950
OG0029512	BdiBd21-3.4G0199066
OG0029513	BdiBd21-3.4G0257100
OG0029514	BdiBd21-3.4G0367500
OG0029515	BdiBd21-3.4G0143500
OG0029516	BdiBd21-3.4G0366400
OG0029517	BdiBd21-3.4G0103400
OG0029518	BdiBd21-3.4G0193300
OG0029519	BdiBd21-3.4G0601900
OG0029520	BdiBd21-3.4G0011150
OG0029521	BdiBd21-3.4G0240800
OG0029522	BdiBd21-3.4G0129500
OG0029523	BdiBd21-3.4G0227600
OG0029524	BdiBd21-3.4G0512066
OG0029525	BdiBd21-3.4G0189400
OG0029526	BdiBd21-3.4G0157000
OG0029527	BdiBd21-3.4G0453750
OG0029528	BdiBd21-3.4G0612700
OG0029529	BdiBd21-3.4G0199650
OG0029530	BdiBd21-3.4G0197700
OG0029531	BdiBd21-3.4G0209800
OG0029532	BdiBd21-3.4G0165701
OG0029533	BdiBd21-3.4G0394400
OG0029534	BdiBd21-3.4G0483300
OG0029535	BdiBd21-3.4G0306100
OG0029536	BdiBd21-3.4G0154100
OG0029537	BdiBd21-3.4G0323450
OG0029538	BdiBd21-3.4G0109100
OG0029539	BdiBd21-3.4G0086950
OG0029540	BdiBd21-3.4G0360450
OG0029541	BdiBd21-3.4G0587100
OG0029542	BdiBd21-3.4G0456500
OG0029543	BdiBd21-3.4G0467000
OG0029544	BdiBd21-3.4G0393650
OG0029545	BdiBd21-3.4G0439001
OG0029546	BdiBd21-3.4G0014600
OG0029547	BdiBd21-3.4G0139700
OG0029548	BdiBd21-3.4G0175600
OG0029549	BdiBd21-3.4G0356400
OG0029550	BdiBd21-3.4G0591700
OG0029551	BdiBd21-3.4G0515000
OG0029552	BdiBd21-3.4G0542366
OG0029553	BdiBd21-3.4G0215166
OG0029554	BdiBd21-3.4G0054200
OG0029555	BdiBd21-3.4G0433700
OG0029556	BdiBd21-3.4G0240900
OG0029557	BdiBd21-3.4G0232500
OG0029558	BdiBd21-3.4G0145300
OG0029559	BdiBd21-3.4G0245100
OG0029560	BdiBd21-3.4G0351250
OG0029561	BdiBd21-3.4G0143900
OG0029562	BdiBd21-3.4G0626400
OG0029563	BdiBd21-3.4G0009200
OG0029564	BdiBd21-3.4G0397532
OG0029565	BdiBd21-3.4G0204900
OG0029566	BdiBd21-3.4G0153600
OG0029567	BdiBd21-3.4G0005900
OG0029568	BdiBd21-3.4G0103050
OG0029569	BdiBd21-3.4G0041950
OG0029570	BdiBd21-3.4G0580050
OG0029571	BdiBd21-3.4G0244950
OG0029572	BdiBd21-3.4G0245350
OG0029573	BdiBd21-3.4G0216900
OG0029574	BdiBd21-3.4G0061900
OG0029575	BdiBd21-3.4G0315400
OG0029576	BdiBd21-3.4G0129501
OG0029577	BdiBd21-3.4G0305200
OG0029578	BdiBd21-3.4G0387800
OG0029579	BdiBd21-3.4G0300200
OG0029580	BdiBd21-3.4G0123400
OG0029581	BdiBd21-3.4G0276100
OG0029582	BdiBd21-3.4G0427001
OG0029583	BdiBd21-3.4G0272800
OG0029584	BdiBd21-3.4G0262950
OG0029585	BdiBd21-3.4G0403740
OG0029586	BdiBd21-3.4G0593700
OG0029587	BdiBd21-3.4G0356600
OG0029588	BdiBd21-3.4G0260500
OG0029589	BdiBd21-3.4G0021100
OG0029590	BdiBd21-3.4G0458601
OG0029591	BdiBd21-3.4G0371000
OG0029592	BdiBd21-3.4G0517150
OG0029593	BdiBd21-3.4G0051900
OG0029594	BdiBd21-3.4G0077800
OG0029595	BdiBd21-3.4G0096200
OG0029596	BdiBd21-3.4G0608150
OG0029597	BdiBd21-3.4G0117050
OG0029598	BdiBd21-3.4G0095100
OG0029599	BdiBd21-3.4G0041500
OG0029600	BdiBd21-3.4G0429300
OG0029601	BdiBd21-3.4G0458700
OG0029602	BdiBd21-3.4G0284950
OG0029603	BdiBd21-3.4G0065100
OG0029604	BdiBd21-3.4G0142400
OG0029605	BdiBd21-3.4G0161801
OG0029606	BdiBd21-3.4G0418250
OG0029607	BdiBd21-3.4G0554200
OG0029608	BdiBd21-3.4G0058800
OG0029609	BdiBd21-3.4G0553800
OG0029610	BdiBd21-3.4G0358300
OG0029611	BdiBd21-3.4G0623600
OG0029612	BdiBd21-3.4G0561900
OG0029613	BdiBd21-3.4G0278300
OG0029614	BdiBd21-3.4G0375901
OG0029615	BdiBd21-3.4G0244233
OG0029616	BdiBd21-3.4G0413450
OG0029617	BdiBd21-3.4G0270600
OG0029618	BdiBd21-3.4G0335850
OG0029619	BdiBd21-3.4G0079900
OG0029620	BdiBd21-3.4G0037300
OG0029621	BdiBd21-3.4G0008950
OG0029622	BdiBd21-3.4G0246400
OG0029623	BdiBd21-3.4G0074400
OG0029624	BdiBd21-3.4G0431200
OG0029625	BdiBd21-3.4G0469033
OG0029626	BdiBd21-3.4G0406500
OG0029627	BdiBd21-3.4G0202600
OG0029628	BdiBd21-3.4G0213950
OG0029629	BdiBd21-3.4G0414900
OG0029630	BdiBd21-3.4G0282600
OG0029631	BdiBd21-3.4G0356200
OG0029632	BdiBd21-3.4G0566600
OG0029633	BdiBd21-3.4G0170200
OG0029634	BdiBd21-3.4G0455550
OG0029635	BdiBd21-3.4G0170100
OG0029636	BdiBd21-3.4G0458150
OG0029637	BdiBd21-3.4G0092666
OG0029638	BdiBd21-3.4G0288450
OG0029639	BdiBd21-3.4G0188433
OG0029640	BdiBd21-3.4G0386450
OG0029641	BdiBd21-3.4G0116650
OG0029642	BdiBd21-3.4G0494200
OG0029643	BdiBd21-3.4G0568950
OG0029644	BdiBd21-3.4G0250350
OG0029645	BdiBd21-3.4G0183800
OG0029646	BdiBd21-3.4G0033700
OG0029647	BdiBd21-3.4G0558800
OG0029648	BdiBd21-3.4G0401000
OG0029649	BdiBd21-3.4G0407600
OG0029650	BdiBd21-3.4G0194600
OG0029651	BdiBd21-3.4G0221901
OG0029652	BdiBd21-3.4G0138400
OG0029653	BdiBd21-3.4G0311233
OG0029654	BdiBd21-3.4G0056550
OG0029655	BdiBd21-3.4G0181600
OG0029656	BdiBd21-3.4G0165800
OG0029657	BdiBd21-3.4G0356800
OG0029658	BdiBd21-3.4G0498350
OG0029659	BdiBd21-3.4G0359800
OG0029660	BdiBd21-3.4G0215133
OG0029661	BdiBd21-3.4G0556550
OG0029662	BdiBd21-3.4G0157300
OG0029663	BdiBd21-3.4G0330500
OG0029664	BdiBd21-3.4G0324900
OG0029665	BdiBd21-3.4G0332300
OG0029666	BdiBd21-3.4G0200600
OG0029667	BdiBd21-3.4G0259100
OG0029668	BdiBd21-3.4G0236500
OG0029669	BdiBd21-3.4G0189250
OG0029670	BdiBd21-3.4G0093400
OG0029671	BdiBd21-3.4G0027001
OG0029672	BdiBd21-3.4G0157250
OG0029673	BdiBd21-3.4G0381850
OG0029674	BdiBd21-3.4G0159400
OG0029675	BdiBd21-3.4G0300400
OG0029676	BdiBd21-3.4G0453800
OG0029677	BdiBd21-3.4G0442000
OG0029678	BdiBd21-3.4G0108766
OG0029679	BdiBd21-3.4G0261700
OG0029680	BdiBd21-3.4G0007900
OG0029681	BdiBd21-3.4G0113620
OG0029682	BdiBd21-3.4G0156100
OG0029683	BdiBd21-3.4G0140300
OG0029684	BdiBd21-3.4G0549900
OG0029685	BdiBd21-3.4G0268500
OG0029686	BdiBd21-3.4G0557400
OG0029687	BdiBd21-3.4G0393800
OG0029688	BdiBd21-3.4G0107950
OG0029689	BdiBd21-3.4G0220966
OG0029690	BdiBd21-3.4G0441150
OG0029691	BdiBd21-3.4G0580350
OG0029692	BdiBd21-3.4G0257400
OG0029693	BdiBd21-3.4G0101800
OG0029694	BdiBd21-3.4G0405333
OG0029695	BdiBd21-3.4G0219766
OG0029696	BdiBd21-3.4G0410300
OG0029697	BdiBd21-3.4G0101100
OG0029698	BdiBd21-3.4G0202700
OG0029699	BdiBd21-3.4G0200350
OG0029700	BdiBd21-3.4G0192400
OG0029701	BdiBd21-3.4G0293600
OG0029702	BdiBd21-3.4G0138850
OG0029703	BdiBd21-3.4G0022232
OG0029704	BdiBd21-3.4G0101000
OG0029705	BdiBd21-3.4G0479800
OG0029706	BdiBd21-3.4G0214750
OG0029707	BdiBd21-3.4G0543450
OG0029708	BdiBd21-3.4G0282800
OG0029709	BdiBd21-3.4G0347701
OG0029710	BdiBd21-3.4G0194050
OG0029711	BdiBd21-3.4G0251900
OG0029712	BdiBd21-3.4G0335000
OG0029713	BdiBd21-3.4G0489700
OG0029714	BdiBd21-3.4G0220200
OG0029715	BdiBd21-3.4G0225866
OG0029716	BdiBd21-3.4G0141100
OG0029717	BdiBd21-3.4G0241801
OG0029718	BdiBd21-3.4G0265100
OG0029719	BdiBd21-3.4G0388033
OG0029720	BdiBd21-3.4G0476200
OG0029721	BdiBd21-3.4G0012001
OG0029722	BdiBd21-3.4G0252260
OG0029723	BdiBd21-3.4G0475300
OG0029724	BdiBd21-3.4G0382150
OG0029725	BdiBd21-3.4G0166633
OG0029726	BdiBd21-3.4G0491100
OG0029727	BdiBd21-3.4G0500050
OG0029728	BdiBd21-3.4G0436833
OG0029729	BdiBd21-3.4G0620700
OG0029730	BdiBd21-3.4G0091400
OG0029731	BdiBd21-3.4G0466900
OG0029732	BdiBd21-3.4G0117200
OG0029733	BdiBd21-3.4G0379900
OG0029734	BdiBd21-3.4G0431300
OG0029735	BdiBd21-3.4G0436700
OG0029736	BdiBd21-3.4G0328900
OG0029737	BdiBd21-3.4G0603050
OG0029738	BdiBd21-3.4G0438400
OG0029739	BdiBd21-3.4G0161700
OG0029740	BdiBd21-3.4G0148633
OG0029741	BdiBd21-3.4G0223200
OG0029742	BdiBd21-3.4G0562050
OG0029743	BdiBd21-3.4G0437101
OG0029744	BdiBd21-3.4G0471000
OG0029745	BdiBd21-3.4G0436300
OG0029746	BdiBd21-3.4G0051632
OG0029747	BdiBd21-3.4G0228100
OG0029748	BdiBd21-3.4G0599000
OG0029749	BdiBd21-3.4G0236800
OG0029750	BdiBd21-3.4G0244850
OG0029751	BdiBd21-3.4G0279700
OG0029752	BdiBd21-3.4G0241401
OG0029753	BdiBd21-3.4G0228232
OG0029754	BdiBd21-3.4G0388066
OG0029755	BdiBd21-3.4G0398000
OG0029756	BdiBd21-3.4G0326300
OG0029757	BdiBd21-3.4G0000450
OG0029758	BdiBd21-3.4G0278001
OG0029759	BdiBd21-3.4G0193600
OG0029760	BdiBd21-3.4G0053100
OG0029761	BdiBd21-3.4G0038250
OG0029762	BdiBd21-3.4G0057800
OG0029763	BdiBd21-3.4G0253700
OG0029764	BdiBd21-3.4G0358200
OG0029765	BdiBd21-3.4G0107000
OG0029766	BdiBd21-3.4G0177700
OG0029767	BdiBd21-3.4G0271550
OG0029768	BdiBd21-3.4G0218300
OG0029769	BdiBd21-3.4G0461200
OG0029770	BdiBd21-3.4G0430150
OG0029771	BdiBd21-3.4G0074700
OG0029772	BdiBd21-3.4G0589200
OG0029773	BdiBd21-3.4G0373250
OG0029774	BdiBd21-3.4G0245601
OG0029775	BdiBd21-3.4G0121500
OG0029776	BdiBd21-3.4G0200701
OG0029777	BdiBd21-3.4G0599600
OG0029778	BdiBd21-3.4G0532100
OG0029779	BdiBd21-3.4G0290700
OG0029780	BdiBd21-3.4G0519100
OG0029781	BdiBd21-3.4G0117100
OG0029782	BdiBd21-3.4G0427360
OG0029783	BdiBd21-3.4G0488200
OG0029784	BdiBd21-3.4G0598150
OG0029785	BdiBd21-3.4G0262750
OG0029786	BdiBd21-3.4G0220933
OG0029787	BdiBd21-3.4G0330950
OG0029788	BdiBd21-3.4G0530500
OG0029789	BdiBd21-3.4G0378701
OG0029790	BdiBd21-3.4G0388900
OG0029791	BdiBd21-3.4G0521300
OG0029792	BdiBd21-3.4G0006300
OG0029793	BdiBd21-3.4G0053750
OG0029794	BdiBd21-3.4G0448500
OG0029795	BdiBd21-3.4G0235900
OG0029796	BdiBd21-3.4G0133201
OG0029797	BdiBd21-3.4G0142200
OG0029798	BdiBd21-3.4G0424400
OG0029799	BdiBd21-3.4G0392150
OG0029800	BdiBd21-3.4G0341900
OG0029801	BdiBd21-3.4G0480400
OG0029802	BdiBd21-3.4G0072200
OG0029803	BdiBd21-3.4G0139600
OG0029804	BdiBd21-3.4G0507850
OG0029805	BdiBd21-3.4G0197100
OG0029806	BdiBd21-3.4G0438600
OG0029807	BdiBd21-3.4G0622851
OG0029808	BdiBd21-3.4G0585850
OG0029809	BdiBd21-3.4G0127900
OG0029810	BdiBd21-3.4G0233250
OG0029811	BdiBd21-3.4G0581500
OG0029812	BdiBd21-3.4G0460300
OG0029813	BdiBd21-3.4G0199033
OG0029814	BdiBd21-3.4G0248600
OG0029815	BdiBd21-3.4G0129250
OG0029816	BdiBd21-3.4G0262100
OG0029817	BdiBd21-3.4G0252900
OG0029818	BdiBd21-3.4G0152666
OG0029819	BdiBd21-3.4G0212333
OG0029820	BdiBd21-3.4G0438500
OG0029821	BdiBd21-3.4G0131000
OG0029822	BdiBd21-3.4G0506850
OG0029823	BdiBd21-3.4G0624400
OG0029824	BdiBd21-3.4G0205800
OG0029825	BdiBd21-3.4G0503201
OG0029826	BdiBd21-3.4G0513200
OG0029827	BdiBd21-3.4G0330100
OG0029828	BdiBd21-3.4G0234201
OG0029829	BdiBd21-3.4G0207000
OG0029830	BdiBd21-3.4G0461600
OG0029831	BdiBd21-3.4G0423100
OG0029832	BdiBd21-3.4G0612366
OG0029833	BdiBd21-3.4G0135000
OG0029834	BdiBd21-3.4G0530550
OG0029835	BdiBd21-3.4G0475250
OG0029836	BdiBd21-3.4G0148766
OG0029837	BdiBd21-3.4G0474950
OG0029838	BdiBd21-3.4G0198400
OG0029839	BdiBd21-3.4G0403050
OG0029840	BdiBd21-3.4G0403780
OG0029841	BdiBd21-3.4G0376366
OG0029842	BdiBd21-3.4G0594900
OG0029843	BdiBd21-3.4G0605650
OG0029844	BdiBd21-3.4G0513100
OG0029845	BdiBd21-3.4G0009500
OG0029846	BdiBd21-3.4G0014201
OG0029847	BdiBd21-3.4G0148600
OG0029848	BdiBd21-3.4G0088900
OG0029849	BdiBd21-3.4G0383350
OG0029850	BdiBd21-3.4G0502750
OG0029851	BdiBd21-3.4G0452850
OG0029852	BdiBd21-3.4G0316800
OG0029853	BdiBd21-3.4G0596300
OG0029854	BdiBd21-3.4G0564633
OG0029855	BdiBd21-3.4G0432000
OG0029856	BdiBd21-3.4G0536500
OG0029857	BdiBd21-3.4G0507350
OG0029858	BdiBd21-3.4G0285450
OG0029859	BdiBd21-3.4G0203532
OG0029860	BdiBd21-3.4G0150201
OG0029861	BdiBd21-3.4G0249900
OG0029862	BdiBd21-3.4G0411500
OG0029863	BdiBd21-3.4G0186633
OG0029864	BdiBd21-3.4G0337550
OG0029865	BdiBd21-3.4G0263400
OG0029866	BdiBd21-3.4G0372300
OG0029867	BdiBd21-3.4G0231200
OG0029868	BdiBd21-3.4G0545750
OG0029869	BdiBd21-3.4G0105300
OG0029870	BdiBd21-3.4G0399300
OG0029871	BdiBd21-3.4G0622801
OG0029872	BdiBd21-3.4G0499400
OG0029873	BdiBd21-3.4G0517000
OG0029874	BdiBd21-3.4G0167650
OG0029875	BdiBd21-3.4G0237900
OG0029876	BdiBd21-3.4G0126450
OG0029877	BdiBd21-3.4G0020700
OG0029878	BdiBd21-3.4G0121300
OG0029879	BdiBd21-3.4G0380200
OG0029880	BdiBd21-3.4G0620100
OG0029881	BdiBd21-3.4G0175100
OG0029882	BdiBd21-3.4G0411250
OG0029883	BdiBd21-3.4G0059800
OG0029884	BdiBd21-3.4G0208800
OG0029885	BdiBd21-3.4G0376600
OG0029886	BdiBd21-3.4G0148300
OG0029887	BdiBd21-3.4G0613100
OG0029888	BdiBd21-3.4G0064750
OG0029889	BdiBd21-3.4G0309900
OG0029890	BdiBd21-3.4G0344100
OG0029891	BdiBd21-3.4G0423200
OG0029892	BdiBd21-3.4G0142700
OG0029893	BdiBd21-3.4G0467700
OG0029894	BdiBd21-3.4G0202900
OG0029895	BdiBd21-3.4G0264800
OG0029896	BdiBd21-3.4G0171900
OG0029897	BdiBd21-3.4G0614900
OG0029898	BdiBd21-3.4G0168200
OG0029899	BdiBd21-3.4G0294900
OG0029900	BdiBd21-3.4G0283200
OG0029901	BdiBd21-3.4G0098700
OG0029902	BdiBd21-3.4G0214500
OG0029903	BdiBd21-3.4G0282966
OG0029904	BdiBd21-3.4G0043100
OG0029905	BdiBd21-3.4G0347600
OG0029906	BdiBd21-3.4G0328832
OG0029907	BdiBd21-3.4G0174701
OG0029908	BdiBd21-3.4G0386200
OG0029909	BdiBd21-3.4G0281950
OG0029910	BdiBd21-3.4G0363100
OG0029911	BdiBd21-3.4G0585650
OG0029912	BdiBd21-3.4G0247700
OG0029913	BdiBd21-3.4G0506701
OG0029914	BdiBd21-3.4G0205200
OG0029915	BdiBd21-3.4G0305300
OG0029916	BdiBd21-3.4G0290000
OG0029917	BdiBd21-3.4G0120150
OG0029918	BdiBd21-3.4G0411600
OG0029919	BdiBd21-3.4G0346550
OG0029920	BdiBd21-3.4G0578950
OG0029921	BdiBd21-3.4G0282400
OG0029922	BdiBd21-3.4G0399450
OG0029923	BdiBd21-3.4G0050650
OG0029924	BdiBd21-3.4G0229066
OG0029925	BdiBd21-3.4G0102900
OG0029926	BdiBd21-3.4G0296600
OG0029927	BdiBd21-3.4G0158600
OG0029928	BdiBd21-3.4G0016333
OG0029929	BdiBd21-3.4G0086100
OG0029930	BdiBd21-3.4G0363000
OG0029931	BdiBd21-3.4G0094000
OG0029932	BdiBd21-3.4G0382800
OG0029933	BdiBd21-3.4G0585700
OG0029934	BdiBd21-3.4G0332250
OG0029935	BdiBd21-3.4G0313400
OG0029936	BdiBd21-3.4G0353500
OG0029937	BdiBd21-3.4G0143550
OG0029938	BdiBd21-3.4G0604800
OG0029939	BdiBd21-3.4G0377550
OG0029940	BdiBd21-3.4G0088150
OG0029941	BdiBd21-3.4G0509400
OG0029942	BdiBd21-3.4G0005100
OG0029943	BdiBd21-3.4G0068750
OG0029944	BdiBd21-3.4G0146766
OG0029945	BdiBd21-3.4G0512033
OG0029946	BdiBd21-3.4G0199500
OG0029947	BdiBd21-3.4G0324700
OG0029948	BdiBd21-3.4G0037600
OG0029949	BdiBd21-3.4G0080900
OG0029950	BdiBd21-3.4G0297850
OG0029951	BdiBd21-3.4G0159200
OG0029952	BdiBd21-3.4G0535650
OG0029953	BdiBd21-3.4G0495301
OG0029954	BdiBd21-3.4G0069300
OG0029955	BdiBd21-3.4G0067200
OG0029956	BdiBd21-3.4G0598500
OG0029957	BdiBd21-3.4G0572800
OG0029958	BdiBd21-3.4G0094401
OG0029959	BdiBd21-3.4G0342800
OG0029960	BdiBd21-3.4G0030401
OG0029961	BdiBd21-3.4G0191100
OG0029962	BdiBd21-3.4G0101701
OG0029963	BdiBd21-3.4G0362900
OG0029964	BdiBd21-3.4G0325933
OG0029965	BdiBd21-3.4G0606650
OG0029966	BdiBd21-3.4G0095400
OG0029967	BdiBd21-3.4G0316450
OG0029968	BdiBd21-3.4G0074633
OG0029969	BdiBd21-3.4G0401932
OG0029970	BdiBd21-3.4G0437700
OG0029971	BdiBd21-3.4G0132100
OG0029972	BdiBd21-3.4G0155300
OG0029973	BdiBd21-3.4G0273600
OG0029974	BdiBd21-3.4G0355200
OG0029975	BdiBd21-3.4G0576100
OG0029976	BdiBd21-3.4G0524800
OG0029977	BdiBd21-3.4G0207700
OG0029978	BdiBd21-3.4G0529000
OG0029979	BdiBd21-3.4G0110400
OG0029980	BdiBd21-3.4G0579300
OG0029981	BdiBd21-3.4G0325400
OG0029982	BdiBd21-3.4G0319100
OG0029983	BdiBd21-3.4G0437300
OG0029984	BdiBd21-3.4G0194400
OG0029985	BdiBd21-3.4G0045700
OG0029986	BdiBd21-3.4G0136300
OG0029987	BdiBd21-3.4G0389300
OG0029988	BdiBd21-3.4G0097800
OG0029989	BdiBd21-3.4G0442500
OG0029990	BdiBd21-3.4G0048750
OG0029991	BdiBd21-3.4G0089700
OG0029992	BdiBd21-3.4G0195966
OG0029993	BdiBd21-3.4G0489000
OG0029994	BdiBd21-3.4G0002900
OG0029995	BdiBd21-3.4G0405300
OG0029996	BdiBd21-3.4G0411350
OG0029997	BdiBd21-3.4G0253000
OG0029998	BdiBd21-3.4G0459000
OG0029999	BdiBd21-3.4G0346500
OG0030000	BdiBd21-3.4G0469200
OG0030001	BdiBd21-3.4G0284900
OG0030002	BdiBd21-3.4G0008100
OG0030003	BdiBd21-3.4G0515900
OG0030004	BdiBd21-3.4G0539100
OG0030005	BdiBd21-3.4G0162700
OG0030006	BdiBd21-3.4G0196100
OG0030007	BdiBd21-3.4G0019400
OG0030008	BdiBd21-3.4G0625601
OG0030009	BdiBd21-3.4G0301600
OG0030010	BdiBd21-3.4G0013700
OG0030011	BdiBd21-3.4G0318600
OG0030012	BdiBd21-3.4G0039050
OG0030013	BdiBd21-3.4G0363800
OG0030014	BdiBd21-3.4G0599900
OG0030015	BdiBd21-3.4G0093500
OG0030016	BdiBd21-3.4G0002000
OG0030017	BdiBd21-3.4G0416400
OG0030018	BdiBd21-3.4G0325450
OG0030019	BdiBd21-3.4G0516700
OG0030020	BdiBd21-3.4G0252420
OG0030021	BdiBd21-3.4G0146000
OG0030022	BdiBd21-3.4G0000800
OG0030023	BdiBd21-3.4G0369532
OG0030024	BdiBd21-3.4G0073350
OG0030025	BdiBd21-3.4G0291150
OG0030026	BdiBd21-3.4G0323966
OG0030027	BdiBd21-3.4G0585750
OG0030028	BdiBd21-3.4G0116300
OG0030029	BdiBd21-3.4G0414450
OG0030030	BdiBd21-3.4G0598900
OG0030031	BdiBd21-3.4G0476900
OG0030032	BdiBd21-3.4G0339400
OG0030033	BdiBd21-3.4G0456900
OG0030034	BdiBd21-3.4G0141750
OG0030035	BdiBd21-3.4G0260333
OG0030036	BdiBd21-3.4G0100200
OG0030037	BdiBd21-3.4G0234100
OG0030038	BdiBd21-3.4G0568832
OG0030039	BdiBd21-3.4G0376900
OG0030040	BdiBd21-3.4G0240000
OG0030041	BdiBd21-3.4G0027600
OG0030042	BdiBd21-3.4G0318201
OG0030043	BdiBd21-3.4G0432200
OG0030044	BdiBd21-3.4G0044100
OG0030045	BdiBd21-3.4G0389100
OG0030046	BdiBd21-3.4G0492000
OG0030047	BdiBd21-3.4G0221000
OG0030048	BdiBd21-3.4G0177800
OG0030049	BdiBd21-3.4G0253966
OG0030050	BdiBd21-3.4G0194500
OG0030051	BdiBd21-3.4G0003800
OG0030052	BdiBd21-3.4G0305800
OG0030053	BdiBd21-3.4G0259200
OG0030054	BdiBd21-3.4G0159550
OG0030055	BdiBd21-3.4G0465850
OG0030056	BdiBd21-3.4G0411650
OG0030057	BdiBd21-3.4G0332900
OG0030058	BdiBd21-3.4G0382650
OG0030059	BdiBd21-3.4G0368900
OG0030060	BdiBd21-3.4G0383700
OG0030061	BdiBd21-3.4G0066250
OG0030062	BdiBd21-3.4G0548100
OG0030063	BdiBd21-3.4G0595850
OG0030064	BdiBd21-3.4G0092200
OG0030065	BdiBd21-3.4G0079500
OG0030066	BdiBd21-3.4G0269300
OG0030067	BdiBd21-3.4G0220600
OG0030068	BdiBd21-3.4G0062400
OG0030069	BdiBd21-3.4G0327000
OG0030070	BdiBd21-3.4G0098400
OG0030071	BdiBd21-3.4G0567000
OG0030072	BdiBd21-3.4G0514050
OG0030073	BdiBd21-3.4G0041300
OG0030074	BdiBd21-3.4G0166666
OG0030075	BdiBd21-3.4G0490100
OG0030076	BdiBd21-3.4G0294800
OG0030077	BdiBd21-3.4G0378432
OG0030078	BdiBd21-3.4G0106950
OG0030079	BdiBd21-3.4G0245450
OG0030080	BdiBd21-3.4G0324100
OG0030081	BdiBd21-3.4G0074600
OG0030082	BdiBd21-3.4G0237500
OG0030083	BdiBd21-3.4G0386100
OG0030084	BdiBd21-3.4G0337700
OG0030085	BdiBd21-3.4G0182600
OG0030086	BdiBd21-3.4G0029400
OG0030087	BdiBd21-3.4G0357850
OG0030088	BdiBd21-3.4G0079600
OG0030089	BdiBd21-3.4G0049050
OG0030090	BdiBd21-3.4G0267900
OG0030091	BdiBd21-3.4G0533032
OG0030092	BdiBd21-3.4G0070100
OG0030093	BdiBd21-3.4G0181800
OG0030094	BdiBd21-3.4G0249400
OG0030095	BdiBd21-3.4G0606350
OG0030096	BdiBd21-3.4G0427700
OG0030097	BdiBd21-3.4G0532201
OG0030098	BdiBd21-3.4G0457600
OG0030099	BdiBd21-3.4G0457550
OG0030100	BdiBd21-3.4G0212200
OG0030101	BdiBd21-3.4G0324300
OG0030102	BdiBd21-3.4G0573500
OG0030103	BdiBd21-3.4G0349100
OG0030104	BdiBd21-3.4G0262600
OG0030105	BdiBd21-3.4G0281000
OG0030106	BdiBd21-3.4G0216450
OG0030107	BdiBd21-3.4G0484400
OG0030108	BdiBd21-3.4G0558300
OG0030109	BdiBd21-3.4G0045200
OG0030110	BdiBd21-3.4G0254700
OG0030111	BdiBd21-3.4G0051200
OG0030112	BdiBd21-3.4G0082200
OG0030113	BdiBd21-3.4G0102400
OG0030114	BdiBd21-3.4G0240300
OG0030115	BdiBd21-3.4G0508150
OG0030116	BdiBd21-3.4G0346300
OG0030117	BdiBd21-3.4G0588500
OG0030118	BdiBd21-3.4G0191200
OG0030119	BdiBd21-3.4G0340800
OG0030120	BdiBd21-3.4G0361950
OG0030121	BdiBd21-3.4G0464650
OG0030122	BdiBd21-3.4G0278150
OG0030123	BdiBd21-3.4G0456400
OG0030124	BdiBd21-3.4G0537232
OG0030125	BdiBd21-3.4G0134100
OG0030126	BdiBd21-3.4G0115900
OG0030127	BdiBd21-3.4G0300000
OG0030128	BdiBd21-3.4G0288950
OG0030129	BdiBd21-3.4G0164900
OG0030130	BdiBd21-3.4G0062800
OG0030131	BdiBd21-3.4G0309600
OG0030132	BdiBd21-3.4G0125550
OG0030133	BdiBd21-3.4G0317600
OG0030134	BdiBd21-3.4G0177600
OG0030135	BdiBd21-3.4G0505800
OG0030136	BdiBd21-3.4G0302000
OG0030137	BdiBd21-3.4G0222250
OG0030138	BdiBd21-3.4G0279900
OG0030139	BdiBd21-3.4G0597100
OG0030140	BdiBd21-3.4G0313000
OG0030141	BdiBd21-3.4G0007500
OG0030142	BdiBd21-3.4G0382900
OG0030143	BdiBd21-3.4G0080800
OG0030144	BdiBd21-3.4G0014700
OG0030145	BdiBd21-3.4G0412200
OG0030146	BdiBd21-3.4G0408350
OG0030147	BdiBd21-3.4G0548400
OG0030148	BdiBd21-3.4G0398100
OG0030149	BdiBd21-3.4G0464766
OG0030150	BdiBd21-3.4G0362450
OG0030151	BdiBd21-3.4G0378366
OG0030152	BdiBd21-3.4G0204400
OG0030153	BdiBd21-3.4G0415350
OG0030154	BdiBd21-3.4G0342700
OG0030155	BdiBd21-3.4G0262400
OG0030156	BdiBd21-3.4G0288100
OG0030157	BdiBd21-3.4G0585300
OG0030158	BdiBd21-3.4G0396600
OG0030159	BdiBd21-3.4G0508900
OG0030160	BdiBd21-3.4G0348500
OG0030161	BdiBd21-3.4G0083666
OG0030162	BdiBd21-3.4G0197900
OG0030163	BdiBd21-3.4G0501450
OG0030164	BdiBd21-3.4G0215800
OG0030165	BdiBd21-3.4G0136950
OG0030166	BdiBd21-3.4G0589700
OG0030167	BdiBd21-3.4G0210700
OG0030168	BdiBd21-3.4G0128900
OG0030169	BdiBd21-3.4G0490800
OG0030170	BdiBd21-3.4G0265800
OG0030171	BdiBd21-3.4G0457400
OG0030172	BdiBd21-3.4G0403100
OG0030173	BdiBd21-3.4G0208900
OG0030174	BdiBd21-3.4G0110000
OG0030175	BdiBd21-3.4G0403400
OG0030176	BdiBd21-3.4G0531500
OG0030177	BdiBd21-3.4G0323200
OG0030178	BdiBd21-3.4G0260900
OG0030179	BdiBd21-3.4G0309300
OG0030180	BdiBd21-3.4G0073000
OG0030181	BdiBd21-3.4G0190500
OG0030182	BdiBd21-3.4G0351650
OG0030183	BdiBd21-3.4G0370400
OG0030184	BdiBd21-3.4G0281700
OG0030185	BdiBd21-3.4G0441300
OG0030186	BdiBd21-3.4G0349450
OG0030187	BdiBd21-3.4G0501800
OG0030188	BdiBd21-3.4G0344700
OG0030189	BdiBd21-3.4G0432233
OG0030190	BdiBd21-3.4G0490200
OG0030191	BdiBd21-3.4G0272000
OG0030192	BdiBd21-3.4G0626900
OG0030193	BdiBd21-3.4G0407000
OG0030194	BdiBd21-3.4G0349500
OG0030195	BdiBd21-3.4G0426450
OG0030196	BdiBd21-3.4G0093550
OG0030197	BdiBd21-3.4G0297750
OG0030198	BdiBd21-3.4G0399550
OG0030199	BdiBd21-3.4G0019500
OG0030200	BdiBd21-3.4G0432650
OG0030201	BdiBd21-3.4G0043200
OG0030202	BdiBd21-3.4G0090850
OG0030203	BdiBd21-3.4G0254000
OG0030204	BdiBd21-3.4G0361501
OG0030205	BdiBd21-3.4G0365200
OG0030206	BdiBd21-3.4G0116200
OG0030207	BdiBd21-3.4G0023350
OG0030208	BdiBd21-3.4G0158500
OG0030209	BdiBd21-3.4G0255400
OG0030210	BdiBd21-3.4G0181250
OG0030211	BdiBd21-3.4G0406575
OG0030212	BdiBd21-3.4G0199750
OG0030213	BdiBd21-3.4G0609850
OG0030214	BdiBd21-3.4G0579800
OG0030215	BdiBd21-3.4G0355450
OG0030216	BdiBd21-3.4G0473100
OG0030217	BdiBd21-3.4G0306566
OG0030218	BdiBd21-3.4G0012650
OG0030219	BdiBd21-3.4G0424800
OG0030220	BdiBd21-3.4G0275700
OG0030221	BdiBd21-3.4G0387700
OG0030222	BdiBd21-3.4G0062700
OG0030223	BdiBd21-3.4G0321600
OG0030224	BdiBd21-3.4G0418100
OG0030225	BdiBd21-3.4G0023100
OG0030226	BdiBd21-3.4G0462400
OG0030227	BdiBd21-3.4G0568766
OG0030228	BdiBd21-3.4G0192500
OG0030229	BdiBd21-3.4G0214700
OG0030230	BdiBd21-3.4G0211900
OG0030231	BdiBd21-3.4G0383100
OG0030232	BdiBd21-3.4G0486400
OG0030233	BdiBd21-3.4G0194000
OG0030234	BdiBd21-3.4G0082300
OG0030235	BdiBd21-3.4G0314500
OG0030236	BdiBd21-3.4G0026400
OG0030237	BdiBd21-3.4G0156800
OG0030238	BdiBd21-3.4G0620500
OG0030239	BdiBd21-3.4G0502466
OG0030240	BdiBd21-3.4G0287900
OG0030241	BdiBd21-3.4G0158400
OG0030242	BdiBd21-3.4G0502800
OG0030243	BdiBd21-3.4G0228350
OG0030244	BdiBd21-3.4G0579650
OG0030245	BdiBd21-3.4G0261000
OG0030246	BdiBd21-3.4G0276650
OG0030247	BdiBd21-3.4G0308700
OG0030248	BdiBd21-3.4G0139250
OG0030249	BdiBd21-3.4G0254300
OG0030250	BdiBd21-3.4G0388301
OG0030251	BdiBd21-3.4G0608525
OG0030252	BdiBd21-3.4G0492400
OG0030253	BdiBd21-3.4G0333300
OG0030254	BdiBd21-3.4G0251600
OG0030255	BdiBd21-3.4G0011100
OG0030256	BdiBd21-3.4G0292600
OG0030257	BdiBd21-3.4G0166050
OG0030258	BdiBd21-3.4G0500100
OG0030259	BdiBd21-3.4G0009000
OG0030260	BdiBd21-3.4G0138800
OG0030261	BdiBd21-3.4G0462800
OG0030262	BdiBd21-3.4G0237701
OG0030263	BdiBd21-3.4G0045100
OG0030264	BdiBd21-3.4G0351900
OG0030265	BdiBd21-3.4G0419000
OG0030266	BdiBd21-3.4G0088100
OG0030267	BdiBd21-3.4G0407550
OG0030268	BdiBd21-3.4G0403300
OG0030269	BdiBd21-3.4G0321400
OG0030270	BdiBd21-3.4G0476950
OG0030271	BdiBd21-3.4G0613450
OG0030272	BdiBd21-3.4G0009701
OG0030273	BdiBd21-3.4G0189000
OG0030274	BdiBd21-3.4G0136000
OG0030275	BdiBd21-3.4G0184566
OG0030276	BdiBd21-3.4G0511250
OG0030277	BdiBd21-3.4G0089300
OG0030278	BdiBd21-3.4G0209900
OG0030279	BdiBd21-3.4G0347300
OG0030280	BdiBd21-3.4G0363400
OG0030281	BdiBd21-3.4G0140700
OG0030282	BdiBd21-3.4G0149000
OG0030283	BdiBd21-3.4G0405366
OG0030284	BdiBd21-3.4G0576850
OG0030285	BdiBd21-3.4G0088600
OG0030286	BdiBd21-3.4G0337500
OG0030287	BdiBd21-3.4G0401100
OG0030288	BdiBd21-3.4G0114300
OG0030289	BdiBd21-3.4G0273200
OG0030290	BdiBd21-3.4G0218900
OG0030291	BdiBd21-3.4G0419601
OG0030292	BdiBd21-3.4G0490600
OG0030293	BdiBd21-3.4G0244400
OG0030294	BdiBd21-3.4G0425050
OG0030295	BdiBd21-3.4G0049750
OG0030296	BdiBd21-3.4G0030500
OG0030297	BdiBd21-3.4G0444100
OG0030298	BdiBd21-3.4G0501500
OG0030299	BdiBd21-3.4G0184800
OG0030300	BdiBd21-3.4G0385000
OG0030301	BdiBd21-3.4G0399600
OG0030302	BdiBd21-3.4G0177100
OG0030303	BdiBd21-3.4G0400750
OG0030304	BdiBd21-3.4G0206700
OG0030305	BdiBd21-3.4G0000400
OG0030306	BdiBd21-3.4G0177650
OG0030307	BdiBd21-3.4G0533100
OG0030308	BdiBd21-3.4G0315700
OG0030309	BdiBd21-3.4G0379600
OG0030310	BdiBd21-3.4G0169700
OG0030311	BdiBd21-3.4G0475000
OG0030312	BdiBd21-3.4G0490500
OG0030313	BdiBd21-3.4G0285100
OG0030314	BdiBd21-3.4G0326601
OG0030315	BdiBd21-3.4G0057400
OG0030316	BdiBd21-3.4G0138900
OG0030317	BdiBd21-3.4G0272500
OG0030318	BdiBd21-3.4G0231400
OG0030319	BdiBd21-3.4G0126050
OG0030320	BdiBd21-3.4G0277650
OG0030321	BdiBd21-3.4G0576700
OG0030322	BdiBd21-3.4G0395800
OG0030323	BdiBd21-3.4G0283100
OG0030324	BdiBd21-3.4G0174400
OG0030325	BdiBd21-3.4G0180950
OG0030326	BdiBd21-3.4G0319500
OG0030327	BdiBd21-3.4G0004250
OG0030328	BdiBd21-3.4G0056000
OG0030329	BdiBd21-3.4G0026900
OG0030330	BdiBd21-3.4G0038550
OG0030331	BdiBd21-3.4G0427480
OG0030332	BdiBd21-3.4G0325600
OG0030333	BdiBd21-3.4G0352100
OG0030334	BdiBd21-3.4G0160300
OG0030335	BdiBd21-3.4G0152400
OG0030336	BdiBd21-3.4G0159100
OG0030337	BdiBd21-3.4G0323666
OG0030338	BdiBd21-3.4G0268000
OG0030339	BdiBd21-3.4G0262800
OG0030340	BdiBd21-3.4G0358100
OG0030341	BdiBd21-3.4G0078400
OG0030342	BdiBd21-3.4G0496250
OG0030343	BdiBd21-3.4G0292350
OG0030344	BdiBd21-3.4G0084200
OG0030345	BdiBd21-3.4G0353750
OG0030346	BdiBd21-3.4G0515101
OG0030347	BdiBd21-3.4G0485000
OG0030348	BdiBd21-3.4G0309201
OG0030349	BdiBd21-3.4G0069950
OG0030350	BdiBd21-3.4G0385850
OG0030351	BdiBd21-3.4G0347450
OG0030352	BdiBd21-3.4G0331900
OG0030353	BdiBd21-3.4G0514450
OG0030354	BdiBd21-3.4G0295100
OG0030355	BdiBd21-3.4G0247400
OG0030356	BdiBd21-3.4G0119632
OG0030357	BdiBd21-3.4G0336200
OG0030358	BdiBd21-3.4G0435400
OG0030359	BdiBd21-3.4G0324032
OG0030360	BdiBd21-3.4G0585550
OG0030361	BdiBd21-3.4G0243600
OG0030362	BdiBd21-3.4G0233800
OG0030363	BdiBd21-3.4G0244266
OG0030364	BdiBd21-3.4G0208750
OG0030365	BdiBd21-3.4G0146650
OG0030366	BdiBd21-3.4G0191300
OG0030367	BdiBd21-3.4G0068700
OG0030368	BdiBd21-3.4G0177266
OG0030369	BdiBd21-3.4G0578232
OG0030370	BdiBd21-3.4G0103000
OG0030371	BdiBd21-3.4G0576150
OG0030372	BdiBd21-3.4G0277300
OG0030373	BdiBd21-3.4G0010800
OG0030374	BdiBd21-3.4G0226000
OG0030375	BdiBd21-3.4G0491501
OG0030376	BdiBd21-3.4G0152250
OG0030377	BdiBd21-3.4G0558200
OG0030378	BdiBd21-3.4G0441350
OG0030379	BdiBd21-3.4G0377500
OG0030380	BdiBd21-3.4G0041850
OG0030381	BdiBd21-3.4G0400850
OG0030382	BdiBd21-3.4G0146966
OG0030383	BdiBd21-3.4G0335100
OG0030384	BdiBd21-3.4G0542750
OG0030385	BdiBd21-3.4G0262200
OG0030386	BdiBd21-3.4G0202500
OG0030387	BdiBd21-3.4G0214800
OG0030388	BdiBd21-3.4G0612900
OG0030389	BdiBd21-3.4G0238500
OG0030390	BdiBd21-3.4G0343950
OG0030391	BdiBd21-3.4G0141300
OG0030392	BdiBd21-3.4G0502000
OG0030393	BdiBd21-3.4G0346150
OG0030394	BdiBd21-3.4G0555400
OG0030395	BdiBd21-3.4G0382251
OG0030396	BdiBd21-3.4G0472200
OG0030397	BdiBd21-3.4G0156300
OG0030398	BdiBd21-3.4G0143300
OG0030399	BdiBd21-3.4G0227400
OG0030400	BdiBd21-3.4G0347266
OG0030401	BdiBd21-3.4G0099650
OG0030402	BdiBd21-3.4G0259350
OG0030403	BdiBd21-3.4G0222600
OG0030404	BdiBd21-3.4G0121400
OG0030405	BdiBd21-3.4G0591600
OG0030406	BdiBd21-3.4G0476250
OG0030407	BdiBd21-3.4G0242300
OG0030408	BdiBd21-3.4G0269500
OG0030409	BdiBd21-3.4G0612801
OG0030410	BdiBd21-3.4G0351000
OG0030411	BdiBd21-3.4G0024301
OG0030412	BdiBd21-3.4G0008450
OG0030413	BdiBd21-3.4G0348350
OG0030414	BdiBd21-3.4G0392251
OG0030415	BdiBd21-3.4G0408900
OG0030416	BdiBd21-3.4G0151366
OG0030417	BdiBd21-3.4G0393700
OG0030418	BdiBd21-3.4G0452250
OG0030419	BdiBd21-3.4G0099850
OG0030420	BdiBd21-3.4G0336500
OG0030421	BdiBd21-3.4G0349750
OG0030422	BdiBd21-3.4G0578800
OG0030423	BdiBd21-3.4G0070350
OG0030424	BdiBd21-3.4G0069350
OG0030425	BdiBd21-3.4G0220400
OG0030426	BdiBd21-3.4G0045600
OG0030427	BdiBd21-3.4G0537850
OG0030428	BdiBd21-3.4G0144700
OG0030429	BdiBd21-3.4G0202300
OG0030430	BdiBd21-3.4G0273450
OG0030431	BdiBd21-3.4G0187900
OG0030432	BdiBd21-3.4G0441500
OG0030433	BdiBd21-3.4G0476600
OG0030434	BdiBd21-3.4G0130100
OG0030435	BdiBd21-3.4G0064900
OG0030436	BdiBd21-3.4G0194950
OG0030437	BdiBd21-3.4G0432266
OG0030438	BdiBd21-3.4G0293300
OG0030439	BdiBd21-3.4G0439700
OG0030440	BdiBd21-3.4G0499450
OG0030441	BdiBd21-3.4G0078000
OG0030442	BdiBd21-3.4G0021600
OG0030443	BdiBd21-3.4G0391200
OG0030444	BdiBd21-3.4G0255900
OG0030445	BdiBd21-3.4G0228950
OG0030446	BdiBd21-3.4G0018700
OG0030447	BdiBd21-3.4G0595050
OG0030448	BdiBd21-3.4G0551400
OG0030449	BdiBd21-3.4G0602200
OG0030450	BdiBd21-3.4G0106000
OG0030451	BdiBd21-3.4G0528450
OG0030452	BdiBd21-3.4G0244900
OG0030453	BdiBd21-3.4G0070051
OG0030454	BdiBd21-3.4G0286250
OG0030455	BdiBd21-3.4G0211100
OG0030456	BdiBd21-3.4G0152150
OG0030457	BdiBd21-3.4G0297201
OG0030458	BdiBd21-3.4G0332100
OG0030459	BdiBd21-3.4G0316850
OG0030460	BdiBd21-3.4G0008000
OG0030461	BdiBd21-3.4G0464400
OG0030462	BdiBd21-3.4G0183933
OG0030463	BdiBd21-3.4G0194900
OG0030464	BdiBd21-3.4G0162800
OG0030465	BdiBd21-3.4G0435300
OG0030466	BdiBd21-3.4G0191650
OG0030467	BdiBd21-3.4G0022166
OG0030468	BdiBd21-3.4G0482500
OG0030469	BdiBd21-3.4G0572900
OG0030470	BdiBd21-3.4G0278100
OG0030471	BdiBd21-3.4G0165150
OG0030472	BdiBd21-3.4G0237300
OG0030473	BdiBd21-3.4G0327850
OG0030474	BdiBd21-3.4G0349900
OG0030475	BdiBd21-3.4G0177332
OG0030476	BdiBd21-3.4G0133150
OG0030477	BdiBd21-3.4G0352500
OG0030478	BdiBd21-3.4G0253933
OG0030479	BdiBd21-3.4G0177850
OG0030480	BdiBd21-3.4G0162600
OG0030481	BdiBd21-3.4G0287200
OG0030482	BdiBd21-3.4G0294250
OG0030483	BdiBd21-3.4G0312200
OG0030484	BdiBd21-3.4G0313200
OG0030485	BdiBd21-3.4G0006050
OG0030486	BdiBd21-3.4G0297700
OG0030487	BdiBd21-3.4G0067601
OG0030488	BdiBd21-3.4G0145100
OG0030489	BdiBd21-3.4G0190801
OG0030490	BdiBd21-3.4G0005750
OG0030491	BdiBd21-3.4G0317200
OG0030492	BdiBd21-3.4G0365500
OG0030493	BdiBd21-3.4G0091200
OG0030494	BdiBd21-3.4G0299600
OG0030495	BdiBd21-3.4G0499600
OG0030496	BdiBd21-3.4G0030100
OG0030497	BdiBd21-3.4G0203650
OG0030498	BdiBd21-3.4G0283650
OG0030499	BdiBd21-3.4G0588150
OG0030500	BdiBd21-3.4G0081100
OG0030501	BdiBd21-3.4G0296100
OG0030502	BdiBd21-3.4G0120100
OG0030503	BdiBd21-3.4G0378500
OG0030504	BdiBd21-3.4G0392201
OG0030505	BdiBd21-3.4G0459450
OG0030506	BdiBd21-3.4G0608100
OG0030507	BdiBd21-3.4G0174600
OG0030508	BdiBd21-3.4G0561700
OG0030509	BdiBd21-3.4G0201000
OG0030510	BdiBd21-3.4G0171300
OG0030511	BdiBd21-3.4G0271800
OG0030512	BdiBd21-3.4G0513400
OG0030513	BdiBd21-3.4G0103500
OG0030514	BdiBd21-3.4G0366300
OG0030515	BdiBd21-3.4G0212100
OG0030516	BdiBd21-3.4G0225150
OG0030517	BdiBd21-3.4G0629350
OG0030518	BdiBd21-3.4G0034850
OG0030519	BdiBd21-3.4G0071000
OG0030520	BdiBd21-3.4G0016366
OG0030521	BdiBd21-3.4G0112850
OG0030522	BdiBd21-3.4G0383533
OG0030523	BdiBd21-3.4G0292000
OG0030524	BdiBd21-3.4G0355300
OG0030525	BdiBd21-3.4G0095500
OG0030526	BdiBd21-3.4G0553400
OG0030527	BdiBd21-3.4G0151700
OG0030528	BdiBd21-3.4G0395500
OG0030529	BdiBd21-3.4G0019300
OG0030530	BdiBd21-3.4G0522100
OG0030531	BdiBd21-3.4G0320050
OG0030532	BdiBd21-3.4G0306850
OG0030533	BdiBd21-3.4G0092150
OG0030534	BdiBd21-3.4G0207632
OG0030535	BdiBd21-3.4G0503400
OG0030536	BdiBd21-3.4G0186050
OG0030537	BdiBd21-3.4G0564666
OG0030538	BdiBd21-3.4G0147300
OG0030539	BdiBd21-3.4G0327900
OG0030540	BdiBd21-3.4G0069550
OG0030541	BdiBd21-3.4G0277032
OG0030542	BdiBd21-3.4G0174900
OG0030543	BdiBd21-3.4G0514200
OG0030544	BdiBd21-3.4G0311900
OG0030545	BdiBd21-3.4G0225833
OG0030546	BdiBd21-3.4G0556500
OG0030547	BdiBd21-3.4G0325500
OG0030548	BdiBd21-3.4G0294500
OG0030549	BdiBd21-3.4G0136900
OG0030550	BdiBd21-3.4G0192200
OG0030551	BdiBd21-3.4G0242700
OG0030552	BdiBd21-3.4G0420900
OG0030553	BdiBd21-3.4G0467200
OG0030554	BdiBd21-3.4G0196050
OG0030555	BdiBd21-3.4G0485500
OG0030556	BdiBd21-3.4G0092500
OG0030557	BdiBd21-3.4G0605500
OG0030558	BdiBd21-3.4G0263600
OG0030559	BdiBd21-3.4G0603200
OG0030560	BdiBd21-3.4G0603250
OG0030561	BdiBd21-3.4G0151900
OG0030562	BdiBd21-3.4G0616100
OG0030563	BdiBd21-3.4G0091301
OG0030564	BdiBd21-3.4G0145500
OG0030565	BdiBd21-3.4G0333233
OG0030566	BdiBd21-3.4G0164600
OG0030567	BdiBd21-3.4G0491600
OG0030568	BdiBd21-3.4G0108900
OG0030569	BdiBd21-3.4G0079400
OG0030570	BdiBd21-3.4G0476800
OG0030571	BdiBd21-3.4G0562100
OG0030572	BdiBd21-3.4G0470500
OG0030573	BdiBd21-3.4G0582400
OG0030574	BdiBd21-3.4G0408250
OG0030575	BdiBd21-3.4G0602000
OG0030576	BdiBd21-3.4G0496351
OG0030577	BdiBd21-3.4G0159900
OG0030578	BdiBd21-3.4G0261150
OG0030579	BdiBd21-3.4G0376432
OG0030580	BdiBd21-3.4G0355600
OG0030581	BdiBd21-3.4G0514701
OG0030582	BdiBd21-3.4G0038500
OG0030583	BdiBd21-3.4G0251400
OG0030584	BdiBd21-3.4G0105801
OG0030585	BdiBd21-3.4G0171950
OG0030586	BdiBd21-3.4G0186666
OG0030587	BdiBd21-3.4G0588900
OG0030588	BdiBd21-3.4G0425600
OG0030589	BdiBd21-3.4G0163800
OG0030590	BdiBd21-3.4G0337266
OG0030591	BdiBd21-3.4G0596100
OG0030592	BdiBd21-3.4G0082150
OG0030593	BdiBd21-3.4G0538300
OG0030594	BdiBd21-3.4G0343300
OG0030595	BdiBd21-3.4G0591800
OG0030596	BdiBd21-3.4G0434100
OG0030597	BdiBd21-3.4G0298500
OG0030598	BdiBd21-3.4G0106350
OG0030599	BdiBd21-3.4G0495200
OG0030600	BdiBd21-3.4G0159050
OG0030601	BdiBd21-3.4G0403860
OG0030602	BdiBd21-3.4G0020900
OG0030603	BdiBd21-3.4G0321350
OG0030604	BdiBd21-3.4G0265350
OG0030605	BdiBd21-3.4G0292233
OG0030606	BdiBd21-3.4G0288400
OG0030607	BdiBd21-3.4G0471100
OG0030608	BdiBd21-3.4G0317300
OG0030609	BdiBd21-3.4G0255700
OG0030610	BdiBd21-3.4G0418900
OG0030611	BdiBd21-3.4G0403820
OG0030612	BdiBd21-3.4G0558600
OG0030613	BdiBd21-3.4G0063700
OG0030614	BdiBd21-3.4G0603800
OG0030615	BdiBd21-3.4G0603650
OG0030616	BdiBd21-3.4G0527301
OG0030617	BdiBd21-3.4G0170600
OG0030618	BdiBd21-3.4G0473700
OG0030619	BdiBd21-3.4G0376500
OG0030620	BdiBd21-3.4G0398200
OG0030621	BdiBd21-3.4G0477500
OG0030622	BdiBd21-3.4G0533400
OG0030623	BdiBd21-3.4G0554800
OG0030624	BdiBd21-3.4G0204301
OG0030625	BdiBd21-3.4G0458000
OG0030626	BdiBd21-3.4G0142250
OG0030627	BdiBd21-3.4G0275532
OG0030628	BdiBd21-3.4G0228166
OG0030629	BdiBd21-3.4G0293100
OG0030630	BdiBd21-3.4G0370450
OG0030631	BdiBd21-3.4G0354000
OG0030632	BdiBd21-3.4G0162300
OG0030633	BdiBd21-3.4G0009300
OG0030634	BdiBd21-3.4G0606100
OG0030635	BdiBd21-3.4G0192900
OG0030636	BdiBd21-3.4G0076850
OG0030637	BdiBd21-3.4G0394300
OG0030638	BdiBd21-3.4G0232166
OG0030639	BdiBd21-3.4G0364950
OG0030640	BdiBd21-3.4G0360200
OG0030641	BdiBd21-3.4G0383566
OG0030642	BdiBd21-3.4G0322600
OG0030643	BdiBd21-3.4G0024200
OG0030644	BdiBd21-3.4G0618000
OG0030645	BdiBd21-3.4G0397000
OG0030646	BdiBd21-3.4G0219832
OG0030647	BdiBd21-3.4G0348400
OG0030648	BdiBd21-3.4G0184632
OG0030649	BdiBd21-3.4G0323350
OG0030650	BdiBd21-3.4G0437250
OG0030651	BdiBd21-3.4G0222100
OG0030652	BdiBd21-3.4G0074666
OG0030653	BdiBd21-3.4G0550000
OG0030654	BdiBd21-3.4G0415100
OG0030655	BdiBd21-3.4G0417200
OG0030656	BdiBd21-3.4G0308600
OG0030657	BdiBd21-3.4G0206750
OG0030658	BdiBd21-3.4G0310250
OG0030659	BdiBd21-3.4G0557550
OG0030660	BdiBd21-3.4G0178300
OG0030661	BdiBd21-3.4G0546150
OG0030662	BdiBd21-3.4G0276600
OG0030663	BdiBd21-3.4G0586900
OG0030664	BdiBd21-3.4G0488750
OG0030665	BdiBd21-3.4G0167100
OG0030666	BdiBd21-3.4G0025100
OG0030667	BdiBd21-3.4G0505500
OG0030668	BdiBd21-3.4G0216200
OG0030669	BdiBd21-3.4G0507200
OG0030670	BdiBd21-3.4G0322100
OG0030671	BdiBd21-3.4G0484700
OG0030672	BdiBd21-3.4G0235100
OG0030673	BdiBd21-3.4G0300600
OG0030674	BdiBd21-3.4G0250100
OG0030675	BdiBd21-3.4G0358400
OG0030676	BdiBd21-3.4G0250300
OG0030677	BdiBd21-3.4G0515200
OG0030678	BdiBd21-3.4G0269350
OG0030679	BdiBd21-3.4G0382201
OG0030680	BdiBd21-3.4G0348300
OG0030681	BdiBd21-3.4G0101500
OG0030682	BdiBd21-3.4G0052566
OG0030683	BdiBd21-3.4G0310200
OG0030684	BdiBd21-3.4G0166600
OG0030685	BdiBd21-3.4G0524400
OG0030686	BdiBd21-3.4G0335301
OG0030687	BdiBd21-3.4G0080600
OG0030688	BdiBd21-3.4G0376400
OG0030689	BdiBd21-3.4G0588701
OG0030690	BdiBd21-3.4G0216650
OG0030691	BdiBd21-3.4G0315650
OG0030692	BdiBd21-3.4G0514601
OG0030693	BdiBd21-3.4G0584600
OG0030694	BdiBd21-3.4G0114500
OG0030695	BdiBd21-3.4G0589100
OG0030696	BdiBd21-3.4G0266100
OG0030697	BdiBd21-3.4G0249501
OG0030698	BdiBd21-3.4G0225100
OG0030699	BdiBd21-3.4G0212650
OG0030700	BdiBd21-3.4G0288000
OG0030701	BdiBd21-3.4G0316400
OG0030702	BdiBd21-3.4G0212300
OG0030703	BdiBd21-3.4G0500200
OG0030704	BdiBd21-3.4G0560700
OG0030705	BdiBd21-3.4G0229033
OG0030706	BdiBd21-3.4G0139300
OG0030707	BdiBd21-3.4G0136500
OG0030708	BdiBd21-3.4G0167600
OG0030709	BdiBd21-3.4G0432600
OG0030710	BdiBd21-3.4G0170300
OG0030711	BdiBd21-3.4G0060101
OG0030712	BdiBd21-3.4G0193100
OG0030713	BdiBd21-3.4G0354400
OG0030714	BdiBd21-3.4G0395150
OG0030715	BdiBd21-3.4G0148666
OG0030716	BdiBd21-3.4G0290550
OG0030717	BdiBd21-3.4G0496600
OG0030718	BdiBd21-3.4G0256000
OG0030719	BdiBd21-3.4G0455700
OG0030720	BdiBd21-3.4G0077700
OG0030721	BdiBd21-3.4G0532400
OG0030722	BdiBd21-3.4G0487600
OG0030723	BdiBd21-3.4G0043600
OG0030724	BdiBd21-3.4G0199300
OG0030725	BdiBd21-3.4G0232900
OG0030726	BdiBd21-3.4G0530600
OG0030727	BdiBd21-3.4G0579050
OG0030728	BdiBd21-3.4G0041000
OG0030729	BdiBd21-3.4G0410000
OG0030730	BdiBd21-3.4G0418400
OG0030731	BdiBd21-3.4G0045850
OG0030732	BdiBd21-3.4G0328400
OG0030733	BdiBd21-3.4G0103600
OG0030734	BdiBd21-3.4G0085032
OG0030735	BdiBd21-3.4G0462201
OG0030736	BdiBd21-3.4G0539950
OG0030737	BdiBd21-3.4G0523800
OG0030738	BdiBd21-3.4G0258900
OG0030739	BdiBd21-3.4G0386300
OG0030740	BdiBd21-3.4G0378600
OG0030741	BdiBd21-3.4G0357000
OG0030742	BdiBd21-3.4G0426300
OG0030743	BdiBd21-3.4G0594750
OG0030744	BdiBd21-3.4G0382100
OG0030745	BdiBd21-3.4G0212366
OG0030746	BdiBd21-3.4G0472250
OG0030747	BdiBd21-3.4G0218150
OG0030748	BdiBd21-3.4G0229200
OG0030749	BdiBd21-3.4G0427300
OG0030750	BdiBd21-3.4G0581100
OG0030751	BdiBd21-3.4G0073700
OG0030752	BdiBd21-3.4G0052900
OG0030753	BdiBd21-3.4G0403600
OG0030754	BdiBd21-3.4G0309001
OG0030755	BdiBd21-3.4G0006666
OG0030756	BdiBd21-3.4G0450500
OG0030757	BdiBd21-3.4G0114450
OG0030758	BdiBd21-3.4G0328600
OG0030759	BdiBd21-3.4G0361050
OG0030760	BdiBd21-3.4G0491900
OG0030761	BdiBd21-3.4G0261500
OG0030762	BdiBd21-3.4G0377150
OG0030763	BdiBd21-3.4G0050900
OG0030764	BdiBd21-3.4G0147800
OG0030765	BdiBd21-3.4G0291000
OG0030766	BdiBd21-3.4G0259501
OG0030767	BdiBd21-3.4G0419300
OG0030768	BdiBd21-3.4G0261650
OG0030769	BdiBd21-3.4G0455150
OG0030770	BdiBd21-3.4G0400700
OG0030771	BdiBd21-3.4G0141400
OG0030772	BdiBd21-3.4G0222900
OG0030773	BdiBd21-3.4G0276200
OG0030774	BdiBd21-3.4G0348801
OG0030775	BdiBd21-3.4G0627600
OG0030776	BdiBd21-3.4G0102350
OG0030777	BdiBd21-3.4G0089100
OG0030778	BdiBd21-3.4G0333401
OG0030779	BdiBd21-3.4G0198500
OG0030780	BdiBd21-3.4G0386600
OG0030781	BdiBd21-3.4G0056700
OG0030782	BdiBd21-3.4G0335400
OG0030783	BdiBd21-3.4G0495600
OG0030784	BdiBd21-3.4G0620850
OG0030785	BdiBd21-3.4G0425700
OG0030786	BdiBd21-3.4G0206300
OG0030787	BdiBd21-3.4G0288250
OG0030788	BdiBd21-3.4G0610000
OG0030789	BdiBd21-3.4G0303400
OG0030790	BdiBd21-3.4G0167300
OG0030791	BdiBd21-3.4G0349300
OG0030792	BdiBd21-3.4G0286100
OG0030793	BdiBd21-3.4G0331650
OG0030794	BdiBd21-3.4G0461132
OG0030795	BdiBd21-3.4G0145001
OG0030796	BdiBd21-3.4G0352700
OG0030797	BdiBd21-3.4G0011800
OG0030798	BdiBd21-3.4G0118401
OG0030799	BdiBd21-3.4G0319300
OG0030800	BdiBd21-3.4G0593201
OG0030801	BdiBd21-3.4G0408600
OG0030802	BdiBd21-3.4G0533528
OG0030803	BdiBd21-3.4G0256050
OG0030804	BdiBd21-3.4G0075300
OG0030805	BdiBd21-3.4G0516100
OG0030806	BdiBd21-3.4G0210600
OG0030807	BdiBd21-3.4G0490400
OG0030808	BdiBd21-3.4G0086800
OG0030809	BdiBd21-3.4G0384350
OG0030810	BdiBd21-3.4G0031900
OG0030811	BdiBd21-3.4G0518450
OG0030812	BdiBd21-3.4G0200300
OG0030813	BdiBd21-3.4G0243700
OG0030814	BdiBd21-3.4G0113100
OG0030815	BdiBd21-3.4G0563300
OG0030816	BdiBd21-3.4G0121200
OG0030817	BdiBd21-3.4G0549400
OG0030818	BdiBd21-3.4G0181400
OG0030819	BdiBd21-3.4G0545700
OG0030820	BdiBd21-3.4G0078600
OG0030821	BdiBd21-3.4G0190400
OG0030822	BdiBd21-3.4G0253900
OG0030823	BdiBd21-3.4G0331201
OG0030824	BdiBd21-3.4G0304500
OG0030825	BdiBd21-3.4G0625000
OG0030826	BdiBd21-3.4G0267000
OG0030827	BdiBd21-3.4G0381701
OG0030828	BdiBd21-3.4G0372100
OG0030829	BdiBd21-3.4G0211300
OG0030830	BdiBd21-3.4G0567400
OG0030831	BdiBd21-3.4G0410200
OG0030832	BdiBd21-3.4G0340900
OG0030833	BdiBd21-3.4G0496150
OG0030834	BdiBd21-3.4G0082500
OG0030835	BdiBd21-3.4G0083700
OG0030836	BdiBd21-3.4G0609600
OG0030837	BdiBd21-3.4G0030650
OG0030838	BdiBd21-3.4G0235400
OG0030839	BdiBd21-3.4G0400900
OG0030840	BdiBd21-3.4G0053800
OG0030841	BdiBd21-3.4G0391000
OG0030842	BdiBd21-3.4G0083633
OG0030843	BdiBd21-3.4G0293200
OG0030844	BdiBd21-3.4G0009950
OG0030845	BdiBd21-3.4G0189200
OG0030846	BdiBd21-3.4G0342550
OG0030847	BdiBd21-3.4G0248700
OG0030848	BdiBd21-3.4G0311266
OG0030849	BdiBd21-3.4G0405700
OG0030850	BdiBd21-3.4G0358700
OG0030851	BdiBd21-3.4G0503600
OG0030852	BdiBd21-3.4G0336700
OG0030853	BdiBd21-3.4G0175300
OG0030854	BdiBd21-3.4G0411800
OG0030855	BdiBd21-3.4G0191750
OG0030856	BdiBd21-3.4G0036100
OG0030857	BdiBd21-3.4G0313300
OG0030858	BdiBd21-3.4G0528400
OG0030859	BdiBd21-3.4G0611300
OG0030860	BdiBd21-3.4G0286400
OG0030861	BdiBd21-3.4G0042700
OG0030862	BdiBd21-3.4G0342100
OG0030863	BdiBd21-3.4G0438300
OG0030864	BdiBd21-3.4G0505600
OG0030865	BdiBd21-3.4G0022700
OG0030866	BdiBd21-3.4G0215550
OG0030867	BdiBd21-3.4G0286900
OG0030868	BdiBd21-3.4G0552300
OG0030869	BdiBd21-3.4G0020300
OG0030870	BdiBd21-3.4G0540000
OG0030871	BdiBd21-3.4G0365550
OG0030872	BdiBd21-3.5G0285400
OG0030873	BdiBd21-3.5G0149000
OG0030874	BdiBd21-3.5G0278000
OG0030875	BdiBd21-3.5G0062232
OG0030876	BdiBd21-3.5G0107700
OG0030877	BdiBd21-3.5G0263650
OG0030878	BdiBd21-3.5G0154401
OG0030879	BdiBd21-3.5G0203400
OG0030880	BdiBd21-3.5G0236100
OG0030881	BdiBd21-3.5G0021633
OG0030882	BdiBd21-3.5G0234600
OG0030883	BdiBd21-3.5G0098400
OG0030884	BdiBd21-3.5G0352601
OG0030885	BdiBd21-3.5G0104601
OG0030886	BdiBd21-3.5G0113401
OG0030887	BdiBd21-3.5G0104300
OG0030888	BdiBd21-3.5G0002632
OG0030889	BdiBd21-3.5G0040200
OG0030890	BdiBd21-3.5G0267100
OG0030891	BdiBd21-3.5G0040101
OG0030892	BdiBd21-3.5G0303500
OG0030893	BdiBd21-3.5G0156800
OG0030894	BdiBd21-3.5G0128901
OG0030895	BdiBd21-3.5G0234900
OG0030896	BdiBd21-3.5G0353000
OG0030897	BdiBd21-3.5G0246600
OG0030898	BdiBd21-3.5G0096750
OG0030899	BdiBd21-3.5G0313600
OG0030900	BdiBd21-3.5G0128050
OG0030901	BdiBd21-3.5G0082800
OG0030902	BdiBd21-3.5G0003151
OG0030903	BdiBd21-3.5G0309100
OG0030904	BdiBd21-3.5G0031450
OG0030905	BdiBd21-3.5G0036550
OG0030906	BdiBd21-3.5G0359150
OG0030907	BdiBd21-3.5G0100000
OG0030908	BdiBd21-3.5G0339450
OG0030909	BdiBd21-3.5G0110250
OG0030910	BdiBd21-3.5G0281600
OG0030911	BdiBd21-3.5G0360250
OG0030912	BdiBd21-3.5G0224300
OG0030913	BdiBd21-3.5G0106801
OG0030914	BdiBd21-3.5G0068600
OG0030915	BdiBd21-3.5G0186000
OG0030916	BdiBd21-3.5G0272700
OG0030917	BdiBd21-3.5G0033700
OG0030918	BdiBd21-3.5G0261401
OG0030919	BdiBd21-3.5G0284200
OG0030920	BdiBd21-3.5G0022800
OG0030921	BdiBd21-3.5G0118100
OG0030922	BdiBd21-3.5G0000500
OG0030923	BdiBd21-3.5G0191100
OG0030924	BdiBd21-3.5G0238550
OG0030925	BdiBd21-3.5G0073700
OG0030926	BdiBd21-3.5G0327550
OG0030927	BdiBd21-3.5G0177200
OG0030928	BdiBd21-3.5G0178050
OG0030929	BdiBd21-3.5G0119700
OG0030930	BdiBd21-3.5G0162801
OG0030931	BdiBd21-3.5G0067900
OG0030932	BdiBd21-3.5G0094750
OG0030933	BdiBd21-3.5G0065050
OG0030934	BdiBd21-3.5G0122500
OG0030935	BdiBd21-3.5G0234100
OG0030936	BdiBd21-3.5G0216433
OG0030937	BdiBd21-3.5G0213700
OG0030938	BdiBd21-3.5G0039100
OG0030939	BdiBd21-3.5G0307700
OG0030940	BdiBd21-3.5G0322901
OG0030941	BdiBd21-3.5G0154700
OG0030942	BdiBd21-3.5G0008300
OG0030943	BdiBd21-3.5G0221850
OG0030944	BdiBd21-3.5G0002900
OG0030945	BdiBd21-3.5G0022100
OG0030946	BdiBd21-3.5G0193100
OG0030947	BdiBd21-3.5G0025400
OG0030948	BdiBd21-3.5G0189700
OG0030949	BdiBd21-3.5G0303400
OG0030950	BdiBd21-3.5G0329200
OG0030951	BdiBd21-3.5G0273350
OG0030952	BdiBd21-3.5G0047300
OG0030953	BdiBd21-3.5G0351000
OG0030954	BdiBd21-3.5G0112266
OG0030955	BdiBd21-3.5G0273150
OG0030956	BdiBd21-3.5G0366300
OG0030957	BdiBd21-3.5G0342000
OG0030958	BdiBd21-3.5G0358900
OG0030959	BdiBd21-3.5G0359833
OG0030960	BdiBd21-3.5G0155150
OG0030961	BdiBd21-3.5G0336601
OG0030962	BdiBd21-3.5G0198300
OG0030963	BdiBd21-3.5G0067950
OG0030964	BdiBd21-3.5G0135850
OG0030965	BdiBd21-3.5G0074400
OG0030966	BdiBd21-3.5G0104900
OG0030967	BdiBd21-3.5G0351800
OG0030968	BdiBd21-3.5G0164966
OG0030969	BdiBd21-3.5G0215400
OG0030970	BdiBd21-3.5G0195601
OG0030971	BdiBd21-3.5G0365300
OG0030972	BdiBd21-3.5G0281700
OG0030973	BdiBd21-3.5G0293900
OG0030974	BdiBd21-3.5G0178800
OG0030975	BdiBd21-3.5G0105000
OG0030976	BdiBd21-3.5G0107100
OG0030977	BdiBd21-3.5G0240400
OG0030978	BdiBd21-3.5G0218900
OG0030979	BdiBd21-3.5G0327000
OG0030980	BdiBd21-3.5G0225800
OG0030981	BdiBd21-3.5G0241500
OG0030982	BdiBd21-3.5G0029501
OG0030983	BdiBd21-3.5G0149550
OG0030984	BdiBd21-3.5G0259700
OG0030985	BdiBd21-3.5G0094850
OG0030986	BdiBd21-3.5G0108800
OG0030987	BdiBd21-3.5G0092700
OG0030988	BdiBd21-3.5G0086400
OG0030989	BdiBd21-3.5G0013466
OG0030990	BdiBd21-3.5G0130400
OG0030991	BdiBd21-3.5G0220700
OG0030992	BdiBd21-3.5G0122900
OG0030993	BdiBd21-3.5G0071000
OG0030994	BdiBd21-3.5G0265800
OG0030995	BdiBd21-3.5G0356300
OG0030996	BdiBd21-3.5G0214300
OG0030997	BdiBd21-3.5G0082850
OG0030998	BdiBd21-3.5G0139100
OG0030999	BdiBd21-3.5G0276400
OG0031000	BdiBd21-3.5G0167600
OG0031001	BdiBd21-3.5G0272501
OG0031002	BdiBd21-3.5G0230800
OG0031003	BdiBd21-3.5G0023366
OG0031004	BdiBd21-3.5G0232900
OG0031005	BdiBd21-3.5G0131500
OG0031006	BdiBd21-3.5G0116633
OG0031007	BdiBd21-3.5G0263700
OG0031008	BdiBd21-3.5G0051100
OG0031009	BdiBd21-3.5G0130500
OG0031010	BdiBd21-3.5G0171501
OG0031011	BdiBd21-3.5G0363800
OG0031012	BdiBd21-3.5G0085700
OG0031013	BdiBd21-3.5G0068650
OG0031014	BdiBd21-3.5G0302400
OG0031015	BdiBd21-3.5G0287600
OG0031016	BdiBd21-3.5G0129050
OG0031017	BdiBd21-3.5G0129000
OG0031018	BdiBd21-3.5G0127000
OG0031019	BdiBd21-3.5G0255200
OG0031020	BdiBd21-3.5G0104250
OG0031021	BdiBd21-3.5G0281300
OG0031022	BdiBd21-3.5G0175700
OG0031023	BdiBd21-3.5G0207000
OG0031024	BdiBd21-3.5G0157600
OG0031025	BdiBd21-3.5G0173300
OG0031026	BdiBd21-3.5G0086300
OG0031027	BdiBd21-3.5G0269001
OG0031028	BdiBd21-3.5G0278900
OG0031029	BdiBd21-3.5G0075800
OG0031030	BdiBd21-3.5G0042550
OG0031031	BdiBd21-3.5G0003101
OG0031032	BdiBd21-3.5G0237700
OG0031033	BdiBd21-3.5G0283200
OG0031034	BdiBd21-3.5G0028100
OG0031035	BdiBd21-3.5G0074600
OG0031036	BdiBd21-3.5G0102901
OG0031037	BdiBd21-3.5G0018900
OG0031038	BdiBd21-3.5G0154001
OG0031039	BdiBd21-3.5G0183300
OG0031040	BdiBd21-3.5G0033850
OG0031041	BdiBd21-3.5G0009750
OG0031042	BdiBd21-3.5G0076900
OG0031043	BdiBd21-3.5G0037700
OG0031044	BdiBd21-3.5G0084700
OG0031045	BdiBd21-3.5G0021666
OG0031046	BdiBd21-3.5G0255000
OG0031047	BdiBd21-3.5G0186100
OG0031048	BdiBd21-3.5G0365350
OG0031049	BdiBd21-3.5G0061300
OG0031050	BdiBd21-3.5G0356032
OG0031051	BdiBd21-3.5G0034800
OG0031052	BdiBd21-3.5G0221700
OG0031053	BdiBd21-3.5G0225850
OG0031054	BdiBd21-3.5G0020100
OG0031055	BdiBd21-3.5G0106950
OG0031056	BdiBd21-3.5G0155550
OG0031057	BdiBd21-3.5G0145100
OG0031058	BdiBd21-3.5G0206450
OG0031059	BdiBd21-3.5G0079600
OG0031060	BdiBd21-3.5G0134700
OG0031061	BdiBd21-3.5G0244000
OG0031062	BdiBd21-3.5G0042600
OG0031063	BdiBd21-3.5G0341400
OG0031064	BdiBd21-3.5G0040400
OG0031065	BdiBd21-3.5G0228101
OG0031066	BdiBd21-3.5G0089900
OG0031067	BdiBd21-3.5G0130100
OG0031068	BdiBd21-3.5G0355400
OG0031069	BdiBd21-3.5G0236950
OG0031070	BdiBd21-3.5G0258800
OG0031071	BdiBd21-3.5G0051600
OG0031072	BdiBd21-3.5G0295750
OG0031073	BdiBd21-3.5G0107600
OG0031074	BdiBd21-3.5G0317150
OG0031075	BdiBd21-3.5G0219750
OG0031076	BdiBd21-3.5G0146800
OG0031077	BdiBd21-3.5G0010900
OG0031078	BdiBd21-3.5G0155450
OG0031079	BdiBd21-3.5G0275700
OG0031080	BdiBd21-3.5G0029300
OG0031081	BdiBd21-3.5G0308900
OG0031082	BdiBd21-3.5G0298200
OG0031083	BdiBd21-3.5G0306500
OG0031084	BdiBd21-3.5G0184200
OG0031085	BdiBd21-3.5G0018200
OG0031086	BdiBd21-3.5G0174050
OG0031087	BdiBd21-3.5G0198001
OG0031088	BdiBd21-3.5G0119500
OG0031089	BdiBd21-3.5G0154500
OG0031090	BdiBd21-3.5G0297200
OG0031091	BdiBd21-3.5G0179700
OG0031092	BdiBd21-3.5G0264500
OG0031093	BdiBd21-3.5G0149050
OG0031094	BdiBd21-3.5G0127700
OG0031095	BdiBd21-3.5G0230300
OG0031096	BdiBd21-3.5G0150300
OG0031097	BdiBd21-3.5G0078400
OG0031098	BdiBd21-3.5G0077800
OG0031099	BdiBd21-3.5G0106900
OG0031100	BdiBd21-3.5G0085800
OG0031101	BdiBd21-3.5G0272200
OG0031102	BdiBd21-3.5G0351150
OG0031103	BdiBd21-3.5G0103200
OG0031104	BdiBd21-3.5G0167300
OG0031105	BdiBd21-3.5G0132250
OG0031106	BdiBd21-3.5G0177500
OG0031107	BdiBd21-3.5G0226600
OG0031108	BdiBd21-3.5G0264766
OG0031109	BdiBd21-3.5G0160333
OG0031110	BdiBd21-3.5G0186400
OG0031111	BdiBd21-3.5G0011600
OG0031112	BdiBd21-3.5G0202700
OG0031113	BdiBd21-3.5G0054300
OG0031114	BdiBd21-3.5G0101101
OG0031115	BdiBd21-3.5G0333800
OG0031116	BdiBd21-3.5G0235100
OG0031117	BdiBd21-3.5G0321000
OG0031118	BdiBd21-3.5G0098450
OG0031119	BdiBd21-3.5G0302250
OG0031120	BdiBd21-3.5G0062700
OG0031121	BdiBd21-3.5G0039665
OG0031122	BdiBd21-3.5G0238901
OG0031123	BdiBd21-3.5G0180733
OG0031124	BdiBd21-3.5G0047900
OG0031125	BdiBd21-3.5G0333100
OG0031126	BdiBd21-3.5G0082900
OG0031127	BdiBd21-3.5G0168900
OG0031128	BdiBd21-3.5G0331400
OG0031129	BdiBd21-3.5G0113600
OG0031130	BdiBd21-3.5G0187650
OG0031131	BdiBd21-3.5G0362400
OG0031132	BdiBd21-3.5G0133300
OG0031133	BdiBd21-3.5G0051450
OG0031134	BdiBd21-3.5G0183800
OG0031135	BdiBd21-3.5G0053250
OG0031136	BdiBd21-3.5G0040766
OG0031137	BdiBd21-3.5G0160100
OG0031138	BdiBd21-3.5G0086800
OG0031139	BdiBd21-3.5G0197633
OG0031140	BdiBd21-3.5G0204200
OG0031141	BdiBd21-3.5G0299600
OG0031142	BdiBd21-3.5G0235600
OG0031143	BdiBd21-3.5G0364350
OG0031144	BdiBd21-3.5G0296500
OG0031145	BdiBd21-3.5G0081700
OG0031146	BdiBd21-3.5G0206400
OG0031147	BdiBd21-3.5G0265050
OG0031148	BdiBd21-3.5G0050600
OG0031149	BdiBd21-3.5G0243400
OG0031150	BdiBd21-3.5G0321800
OG0031151	BdiBd21-3.5G0071850
OG0031152	BdiBd21-3.5G0068800
OG0031153	BdiBd21-3.5G0113900
OG0031154	BdiBd21-3.5G0019100
OG0031155	BdiBd21-3.5G0244633
OG0031156	BdiBd21-3.5G0164850
OG0031157	BdiBd21-3.5G0141632
OG0031158	BdiBd21-3.5G0366000
OG0031159	BdiBd21-3.5G0312400
OG0031160	BdiBd21-3.5G0133500
OG0031161	BdiBd21-3.5G0035200
OG0031162	BdiBd21-3.5G0140200
OG0031163	BdiBd21-3.5G0092300
OG0031164	BdiBd21-3.5G0073000
OG0031165	BdiBd21-3.5G0138200
OG0031166	BdiBd21-3.5G0121200
OG0031167	BdiBd21-3.5G0159700
OG0031168	BdiBd21-3.5G0295900
OG0031169	BdiBd21-3.5G0351600
OG0031170	BdiBd21-3.5G0257300
OG0031171	BdiBd21-3.5G0327800
OG0031172	BdiBd21-3.5G0046600
OG0031173	BdiBd21-3.5G0324300
OG0031174	BdiBd21-3.5G0130550
OG0031175	BdiBd21-3.5G0201700
OG0031176	BdiBd21-3.5G0333200
OG0031177	BdiBd21-3.5G0041000
OG0031178	BdiBd21-3.5G0133366
OG0031179	BdiBd21-3.5G0082400
OG0031180	BdiBd21-3.5G0254333
OG0031181	BdiBd21-3.5G0120300
OG0031182	BdiBd21-3.5G0014600
OG0031183	BdiBd21-3.5G0104850
OG0031184	BdiBd21-3.5G0009200
OG0031185	BdiBd21-3.5G0059900
OG0031186	BdiBd21-3.5G0278650
OG0031187	BdiBd21-3.5G0332600
OG0031188	BdiBd21-3.5G0044300
OG0031189	BdiBd21-3.5G0086100
OG0031190	BdiBd21-3.5G0257001
OG0031191	BdiBd21-3.5G0056700
OG0031192	BdiBd21-3.5G0069950
OG0031193	BdiBd21-3.5G0102951
OG0031194	BdiBd21-3.5G0078800
OG0031195	BdiBd21-3.5G0082050
OG0031196	BdiBd21-3.5G0212000
OG0031197	BdiBd21-3.5G0330000
OG0031198	BdiBd21-3.5G0201200
OG0031199	BdiBd21-3.5G0109700
OG0031200	BdiBd21-3.5G0057100
OG0031201	BdiBd21-3.5G0345000
OG0031202	BdiBd21-3.5G0197700
OG0031203	BdiBd21-3.5G0101500
OG0031204	BdiBd21-3.5G0179300
OG0031205	BdiBd21-3.5G0077100
OG0031206	BdiBd21-3.5G0243500
OG0031207	BdiBd21-3.5G0041700
OG0031208	BdiBd21-3.5G0007800
OG0031209	BdiBd21-3.5G0130750
OG0031210	BdiBd21-3.5G0039901
OG0031211	BdiBd21-3.5G0152150
OG0031212	BdiBd21-3.5G0341500
OG0031213	BdiBd21-3.5G0267450
OG0031214	BdiBd21-3.5G0029200
OG0031215	BdiBd21-3.5G0346300
OG0031216	BdiBd21-3.5G0173500
OG0031217	BdiBd21-3.5G0086700
OG0031218	BdiBd21-3.5G0067000
OG0031219	BdiBd21-3.5G0086866
OG0031220	BdiBd21-3.5G0011750
OG0031221	BdiBd21-3.5G0071700
OG0031222	BdiBd21-3.5G0166200
OG0031223	BdiBd21-3.5G0364600
OG0031224	BdiBd21-3.5G0012950
OG0031225	BdiBd21-3.5G0247500
OG0031226	BdiBd21-3.5G0251750
OG0031227	BdiBd21-3.5G0007950
OG0031228	BdiBd21-3.5G0013400
OG0031229	BdiBd21-3.5G0213800
OG0031230	BdiBd21-3.5G0168000
OG0031231	BdiBd21-3.5G0125500
OG0031232	BdiBd21-3.5G0244450
OG0031233	BdiBd21-3.5G0134500
OG0031234	BdiBd21-3.5G0323200
OG0031235	BdiBd21-3.5G0050000
OG0031236	BdiBd21-3.5G0158550
OG0031237	BdiBd21-3.5G0044100
OG0031238	BdiBd21-3.5G0104500
OG0031239	BdiBd21-3.5G0121300
OG0031240	BdiBd21-3.5G0350900
OG0031241	BdiBd21-3.5G0009800
OG0031242	BdiBd21-3.5G0229350
OG0031243	BdiBd21-3.5G0157400
OG0031244	BdiBd21-3.5G0200700
OG0031245	BdiBd21-3.5G0063050
OG0031246	BdiBd21-3.5G0288300
OG0031247	BdiBd21-3.5G0033100
OG0031248	BdiBd21-3.5G0089100
OG0031249	BdiBd21-3.5G0288250
OG0031250	BdiBd21-3.5G0254366
OG0031251	BdiBd21-3.5G0057750
OG0031252	BdiBd21-3.5G0200250
OG0031253	BdiBd21-3.5G0183500
OG0031254	BdiBd21-3.5G0018650
OG0031255	BdiBd21-3.5G0084300
OG0031256	BdiBd21-3.5G0043401
OG0031257	BdiBd21-3.5G0290600
OG0031258	BdiBd21-3.5G0358433
OG0031259	BdiBd21-3.5G0209100
OG0031260	BdiBd21-3.5G0124200
OG0031261	BdiBd21-3.5G0110600
OG0031262	BdiBd21-3.5G0116666
OG0031263	BdiBd21-3.5G0102850
OG0031264	BdiBd21-3.5G0259500
OG0031265	BdiBd21-3.5G0068200
OG0031266	BdiBd21-3.5G0073900
OG0031267	BdiBd21-3.5G0087200
OG0031268	BdiBd21-3.5G0192500
OG0031269	BdiBd21-3.5G0216200
OG0031270	BdiBd21-3.5G0040350
OG0031271	BdiBd21-3.5G0222500
OG0031272	BdiBd21-3.5G0137650
OG0031273	BdiBd21-3.5G0190300
OG0031274	BdiBd21-3.5G0232100
OG0031275	BdiBd21-3.5G0058233
OG0031276	BdiBd21-3.5G0178850
OG0031277	BdiBd21-3.5G0117400
OG0031278	BdiBd21-3.5G0100950
OG0031279	BdiBd21-3.5G0088200
OG0031280	BdiBd21-3.5G0353750
OG0031281	BdiBd21-3.5G0290500
OG0031282	BdiBd21-3.5G0043350
OG0031283	BdiBd21-3.5G0072900
OG0031284	BdiBd21-3.5G0232300
OG0031285	BdiBd21-3.5G0339600
OG0031286	BdiBd21-3.5G0042900
OG0031287	BdiBd21-3.5G0015301
OG0031288	BdiBd21-3.5G0151600
OG0031289	BdiBd21-3.5G0290800
OG0031290	BdiBd21-3.5G0164800
OG0031291	BdiBd21-3.5G0017000
OG0031292	BdiBd21-3.5G0133200
OG0031293	BdiBd21-3.5G0268900
OG0031294	BdiBd21-3.5G0120600
OG0031295	BdiBd21-3.5G0155850
OG0031296	BdiBd21-3.5G0024000
OG0031297	BdiBd21-3.5G0320800
OG0031298	BdiBd21-3.5G0009700
OG0031299	BdiBd21-3.5G0301900
OG0031300	BdiBd21-3.5G0095300
OG0031301	BdiBd21-3.5G0062166
OG0031302	BdiBd21-3.5G0082000
OG0031303	BdiBd21-3.5G0303100
OG0031304	BdiBd21-3.5G0165300
OG0031305	BdiBd21-3.5G0283900
OG0031306	BdiBd21-3.5G0365450
OG0031307	BdiBd21-3.5G0300450
OG0031308	BdiBd21-3.5G0255132
OG0031309	BdiBd21-3.5G0122800
OG0031310	BdiBd21-3.5G0015400
OG0031311	BdiBd21-3.5G0160366
OG0031312	BdiBd21-3.5G0032166
OG0031313	BdiBd21-3.5G0352700
OG0031314	BdiBd21-3.5G0216466
OG0031315	BdiBd21-3.5G0025900
OG0031316	BdiBd21-3.5G0338200
OG0031317	BdiBd21-3.5G0279700
OG0031318	BdiBd21-3.5G0183350
OG0031319	BdiBd21-3.5G0144650
OG0031320	BdiBd21-3.5G0170900
OG0031321	BdiBd21-3.5G0167400
OG0031322	BdiBd21-3.5G0223500
OG0031323	BdiBd21-3.5G0047801
OG0031324	BdiBd21-3.5G0011700
OG0031325	BdiBd21-3.5G0132400
OG0031326	BdiBd21-3.5G0073500
OG0031327	BdiBd21-3.5G0181600
OG0031328	BdiBd21-3.5G0315332
OG0031329	BdiBd21-3.5G0071250
OG0031330	BdiBd21-3.5G0224101
OG0031331	BdiBd21-3.5G0108550
OG0031332	BdiBd21-3.5G0324100
OG0031333	BdiBd21-3.5G0204250
OG0031334	BdiBd21-3.5G0084766
OG0031335	BdiBd21-3.5G0199700
OG0031336	BdiBd21-3.5G0221250
OG0031337	BdiBd21-3.5G0114700
OG0031338	BdiBd21-3.5G0155500
OG0031339	BdiBd21-3.5G0325100
OG0031340	BdiBd21-3.5G0051650
OG0031341	BdiBd21-3.5G0219000
OG0031342	BdiBd21-3.5G0042233
OG0031343	BdiBd21-3.5G0148700
OG0031344	BdiBd21-3.5G0009600
OG0031345	BdiBd21-3.5G0029101
OG0031346	BdiBd21-3.5G0121400
OG0031347	BdiBd21-3.5G0101900
OG0031348	BdiBd21-3.5G0237950
OG0031349	BdiBd21-3.5G0261100
OG0031350	BdiBd21-3.5G0083200
OG0031351	BdiBd21-3.5G0102400
OG0031352	BdiBd21-3.5G0365851
OG0031353	BdiBd21-3.5G0341450
OG0031354	BdiBd21-3.5G0324500
OG0031355	BdiBd21-3.5G0215300
OG0031356	BdiBd21-3.5G0034900
OG0031357	BdiBd21-3.5G0108700
OG0031358	BdiBd21-3.5G0238401
OG0031359	BdiBd21-3.5G0084733
OG0031360	BdiBd21-3.5G0014200
OG0031361	BdiBd21-3.5G0334700
OG0031362	BdiBd21-3.5G0354950
OG0031363	BdiBd21-3.5G0105901
OG0031364	BdiBd21-3.5G0031000
OG0031365	BdiBd21-3.5G0092850
OG0031366	BdiBd21-3.5G0206650
OG0031367	BdiBd21-3.5G0120800
OG0031368	BdiBd21-3.5G0109800
OG0031369	BdiBd21-3.5G0055100
OG0031370	BdiBd21-3.5G0050500
OG0031371	BdiBd21-3.5G0289050
OG0031372	BdiBd21-3.5G0320500
OG0031373	BdiBd21-3.5G0105200
OG0031374	BdiBd21-3.5G0280500
OG0031375	BdiBd21-3.5G0264650
OG0031376	BdiBd21-3.5G0182450
OG0031377	BdiBd21-3.5G0053200
OG0031378	BdiBd21-3.5G0342701
OG0031379	BdiBd21-3.5G0245600
OG0031380	BdiBd21-3.5G0239200
OG0031381	BdiBd21-3.5G0267900
OG0031382	BdiBd21-3.5G0102700
OG0031383	BdiBd21-3.5G0202800
OG0031384	BdiBd21-3.5G0092100
OG0031385	BdiBd21-3.5G0178500
OG0031386	BdiBd21-3.5G0072000
OG0031387	BdiBd21-3.5G0325500
OG0031388	BdiBd21-3.5G0005600
OG0031389	BdiBd21-3.5G0327500
OG0031390	BdiBd21-3.5G0040300
OG0031391	BdiBd21-3.5G0358466
OG0031392	BdiBd21-3.5G0350950
OG0031393	BdiBd21-3.5G0013700
OG0031394	BdiBd21-3.5G0121700
OG0031395	BdiBd21-3.5G0151400
OG0031396	BdiBd21-3.5G0238750
OG0031397	BdiBd21-3.5G0175100
OG0031398	BdiBd21-3.5G0193550
OG0031399	BdiBd21-3.5G0297000
OG0031400	BdiBd21-3.5G0086833
OG0031401	BdiBd21-3.5G0312000
OG0031402	BdiBd21-3.5G0112000
OG0031403	BdiBd21-3.5G0206600
OG0031404	BdiBd21-3.5G0160050
OG0031405	BdiBd21-3.5G0075600
OG0031406	BdiBd21-3.5G0245150
OG0031407	BdiBd21-3.5G0014100
OG0031408	BdiBd21-3.5G0234000
OG0031409	BdiBd21-3.5G0335000
OG0031410	BdiBd21-3.5G0298000
OG0031411	BdiBd21-3.5G0219350
OG0031412	BdiBd21-3.5G0243300
OG0031413	BdiBd21-3.5G0215600
OG0031414	BdiBd21-3.5G0345301
OG0031415	BdiBd21-3.5G0091000
OG0031416	BdiBd21-3.5G0099300
OG0031417	BdiBd21-3.5G0030866
OG0031418	BdiBd21-3.5G0139050
[truncated: 27,769 more rows]
