# Supplementary material for: Identification of Candidate Susceptibility Genes to Puccinia graminis f. sp. tritici in Wheat
Source: Front Plant Sci. 2021 Apr 21;12:657796. doi: 10.3389/fpls.2021.657796 (PMC8097158; doi:10.3389/fpls.2021.657796)
Supplement: Supplementary file 6 [file Table_6.XLSX]

## Sheet: W2691
Table S6. Average gene expression (FPKM), orthogroup, GO terms, and coexpression cluster numbers associated with all genes in W2691.
GeneID	FPKM2dpi_mock	FPKM2dpi_inoc	FPKM4dpi_mock	FPKM4dpi_inoc	FPKM6dpi_mock	FPKM6dpi_inoc	Orthogroup	Goterms	Cluster
TraesCS1B02G195000	0	0	0	0	0	0	OG0001492	GO:0005634,GO:0005739,GO:0005783
TraesCS7A02G309800	0.855429	0.726537	0.563983	1.36427	0.737047	1.31035	OG0012304	GO:0003676,GO:0004518,GO:0005622	22437
TraesCS7D02G515800	0.467461	0.317382	0.2507	0.449293	0.478254	0.736898	OG0008825	GO:0005768	24950
TraesCS3D02G020400	2.4811	2.38517	2.20068	3.98861	1.45121	4.89217	OG0000022	GO:0003676	11757
TraesCS3A02G312000	0	0	0	0.0754238	0.229551	0.25208	OG0023601	GO:0005634,GO:0005737
TraesCS6A02G415931	0.351404	1.10773	0.326133	0.760433	0.586547	1.70754	OG0002987	GO:0003723,GO:0004518	19989
TraesCS1A02G116000	5.76171	4.08991	3.95073	5.91724	4.46199	5.1072	OG0002464	GO:0005739	3323
TraesCS3D02G406900	0	0	0	0	0	0	OG0000745	GO:0005773
TraesCS7A02G103900	0	0	0	0.0906749	0	0.408933	OG0000012	GO:0003677,GO:0005634
TraesCS2A02G502600	0	0	0	0	0	0	OG0024083	GO:0005576
TraesCS2A02G455200	4.28164	3.62137	8.69589	4.1358	14.8326	3.23284	OG0006712	GO:0005488,GO:0005576	2
TraesCS1D02G180300	23.4687	16.654	23.7494	35.0852	28.4362	22.716	OG0052465		5382
TraesCS6D02G029600	0	0	0	0	0	0	OG0016524
TraesCS5A02G259800	0	0	0	0	0	0	OG0000735	GO:0005737
TraesCS7D02G456400	0	0	0	0.171909	0	1.05831	OG0001089	GO:0005515,GO:0005739
TraesCS5D02G563300	0	0	0	0	0	0	OG0049265
TraesCS3A02G139200	3.01376	2.98388	2.45822	3.88853	2.64378	4.96089	OG0012080	GO:0005794	9725
TraesCS3D02G106200	0.957991	1.10977	1.44271	1.39999	1.95314	1.52363	OG0003670	GO:0003677,GO:0005634	11902
TraesCS7D02G229500	0.667355	0.867645	1.05062	1.16071	1.06152	1.69124	OG0022269	GO:0005634,GO:0005737	24302
TraesCSU02G186200	0	0	0	0	0	0	OG0056424
TraesCS4A02G054900	1.01159	0.734519	0.558746	0.986851	0.59125	2.13495	OG0053959	GO:0005794	78
TraesCS3D02G432200	2.54274	2.73818	2.60879	4.11158	2.31151	4.37756	OG0011865	GO:0005634	12655
TraesCS1D02G158500	0	0	0	0	0	0	OG0023990	GO:0003676
TraesCS2D02G284200	3.75856	3.55791	3.27042	5.00068	2.95925	5.57804	OG0006547		8877
TraesCS1A02G422800	0.670344	0.701737	0.899633	0.665118	0.56992	0.29256	OG0000025		4006
TraesCS7D02G545700	0	0	0	0	0	0	OG0017781	GO:0005737
TraesCS2B02G615200	0	0	0	0	0	0	OG0023962	GO:0003824,GO:0005773
TraesCS4D02G016100	0	0	0	0	0	0	OG0005399	GO:0005773
TraesCS2B02G252700	0	0	0	0	0	0	OG0047820	GO:0005198
TraesCS3A02G290300	0.00207548	0.0153199	0	0.0128804	0	0.0853993	OG0016075
TraesCS3D02G396000	0.55881	0.434034	0.309902	0.577877	0.555545	0.591172	OG0005538		12588
TraesCS5B02G065200	22.6288	19.7823	24.2168	25.882	30.5194	25.0155	OG0003935		16811
TraesCS4B02G115600	1.14194	1.10359	1.08465	1.24214	0.903936	2.76691	OG0009157	GO:0005634,GO:0005737	14093
TraesCS3D02G146900	0.134888	0.475252	0.34352	0.393552	0.636068	0.907747	OG0005737	GO:0003677,GO:0005634	11994
TraesCS1B02G476000	0.0414671	0.00549198	0	0.00702019	0.0223137	0.0364785	OG0017253
TraesCS6B02G014200	0.0469267	0	0	0	0	0	OG0013410
TraesCS2A02G120500	0	0.0103622	0.062939	0.0144799	0.0459688	0.0696561	OG0000729
TraesCS4A02G481000	0.024247	0	0	0.0702055	0.0293643	1.54635	OG0001265
TraesCS1A02G103900	0.880253	1.09265	1.34672	3.36627	2.40465	11.6971	OG0006305	GO:0005737	0
TraesCSU02G166800	0.474023	0.602559	0.763067	0.755342	0.853616	0.619211	OG0020182	GO:0005634	25216
TraesCS2A02G465000	5.52514	5.5122	6.32277	6.1335	8.84075	2.59158	OG0000639		1
TraesCS1A02G077900	0	0	0	0	0	0	OG0026927	GO:0005576
TraesCS2A02G534400	1.61701	1.78031	0.90984	2.04364	0.761181	1.15644	OG0049073		2217
TraesCS5A02G388000	0.0258525	0.00594974	0	0.0376992	0.0352008	0.0655545	OG0027419
TraesCS3A02G082600	0	0	0	0	0	0	OG0023844	GO:0005198,GO:0005634
TraesCS3B02G199700	0	0	0	0	0	0	OG0013368	GO:0003824,GO:0005488,GO:0005737
TraesCS5B02G408100	15.0678	12.3841	16.1313	14.766	22.4918	17.099	OG0005352		36
TraesCS7A02G483100	0.931272	0.632173	0.565177	0.782355	1.06381	0.489473	OG0014742	GO:0003677,GO:0003682,GO:0005634	22800
TraesCS4D02G349300	0	0	0	0	0	0	OG0005520	GO:0005576,GO:0005618,GO:0005773
TraesCS1A02G209600	2.08644	1.63426	2.06952	2.40402	1.79755	3.56832	OG0012735		3566
TraesCS4B02G244600	0	0	0	0	0	0	OG0010910
TraesCS3B02G412100	0	0	0	0	0	0	OG0003855	GO:0003700,GO:0005634
TraesCS2B02G531100	0.0982299	0.0767533	0	0.107728	0	0	OG0017744	GO:0003677,GO:0003700,GO:0005634
TraesCS1B02G088600	0.0187286	0.00968993	0	0.020762	0	0.245284	OG0011971	GO:0005634
TraesCS5D02G451900	0.755823	0.665771	0.533043	1.25646	0.557172	2.37861	OG0010737	GO:0005634	0
TraesCS3B02G054500	0	0	0	0	0	0	OG0054481	GO:0005794
TraesCS2B02G072100	0	0	0	0	0	0	OG0000534
TraesCS2B02G081900	0.583813	0.50466	0.84211	0.77816	1.40927	0.317775	OG0003868		7205
TraesCS3D02G342200	4.18505	3.44594	3.89913	7.95695	4.39203	7.44385	OG0011178		12484
TraesCS5B02G136500	2.91137	3.20015	2.47236	1.72893	2.43043	1.47781	OG0009287	GO:0005739	1
TraesCS3A02G216100	0.906426	1.23898	1.86875	2.06229	2.48762	1.93115	OG0003597		9938
TraesCS4A02G219100	6.87611	5.91828	4.95535	6.03652	4.58875	3.78382	OG0006026	GO:0005634	1
TraesCS3B02G087800	0	0	0	0	0	0	OG0013006	GO:0003700,GO:0005634
TraesCS6B02G319100	0	0	0	0	0	0	OG0001306	GO:0005654,GO:0005737
TraesCS3A02G473000	0	0	0	0	0	0	OG0028463
TraesCS2D02G436900	0	0	0	0	0	0	OG0001550	GO:0005576
TraesCS3B02G394800	2.91873	2.54203	2.15481	3.89383	2.08032	3.69377	OG0019238	GO:0005634,GO:0005737	11384
TraesCS5B02G171400	2.70997	2.23322	1.92218	3.05742	2.21619	2.7884	OG0054898	GO:0003677,GO:0005634	17110
TraesCS7A02G451800	0	0	0	0	0	0	OG0049319	GO:0005618,GO:0005737
TraesCS6D02G021600	1.09941	0.89498	0.901357	1.02318	0.913922	0.88693	OG0000034	GO:0003677,GO:0003723,GO:0003824,GO:0005794	20978
TraesCS3A02G256800	0.0319929	0	0.0317998	0	0	0.0460161	OG0028401	GO:0005739
TraesCS6B02G420700	0	0	0	0	0	0	OG0047118	GO:0005634
TraesCS3B02G361400	0	0	0	0	0	0	OG0004464
TraesCS6B02G110000	0.502405	0.439757	0.35603	0.794273	0.436965	0.698988	OG0012256	GO:0003700,GO:0005634	20169
TraesCS6B02G115500	3.41435	4.19389	3.6236	6.64834	3.20094	6.79053	OG0005779		20187
TraesCS3B02G476300	0	0	0	0	0	0	OG0017709
TraesCS5D02G128800	0.891223	0.651285	0.589303	0.949318	0.674587	1.19907	OG0004047	GO:0005794	18209
TraesCS1D02G306600	0.199201	0.032579	0.0504448	0.151081	0.0261011	0.590907	OG0053053	GO:0005515,GO:0005634,GO:0005773,GO:0005777	2089
TraesCS7D02G531500	0	0.0275355	0.0403859	0.0640877	0	0.198182	OG0001025
TraesCS2B02G464300	3.65125	5.12328	3.98401	7.47577	3.68215	11.0195	OG0002086	GO:0005198,GO:0005488,GO:0005730,GO:0005773	627
TraesCS4A02G304400	0	0.00522192	0	0.0161465	0	0.0163805	OG0000849
TraesCS6A02G315800	0.137426	0.15555	0.0955919	0.085437	0.174837	0.134994	OG0016571
TraesCS4D02G349100	2.50053	2.50826	2.67403	4.18452	2.85726	5.29363	OG0057235	GO:0005198,GO:0005576,GO:0005634	15470
TraesCS3B02G497400	0	0	0	0	0	0	OG0028463
TraesCS4A02G177200	0	0	0	0	0	0	OG0018151	GO:0003676
TraesCS3B02G193000	11.9344	6.04378	7.87287	14.9264	7.69966	8.11085	OG0058848		10900
TraesCS7A02G118400	0	0	0	0	0	0	OG0023613	GO:0005618
TraesCS6A02G104600	0	0	0	0	0.0959999	0	OG0024100	GO:0005634,GO:0005737
TraesCS7B02G273100	1.08226	1.37766	1.31218	1.48863	1.15868	2.23124	OG0012894	GO:0005488,GO:0005634,GO:0005739	23547
TraesCS7A02G492700	0	0.0511025	0	0.0503001	0	0	OG0008485
TraesCS5B02G028800	0	0	0.0470013	0.0858562	0	3.80302	OG0047126	GO:0005618
TraesCS2A02G566900	0	0	0	0	0	0	OG0000058
TraesCS1D02G212900	0	0	0	0	0	0	OG0003326	GO:0005730
TraesCS4D02G238200	0	0.0359768	0	0	0	0.0564275	OG0004391	GO:0005773
TraesCS3B02G527600	0	0	0	0	0	0	OG0024410
TraesCS5B02G458900	0	0	0	0	0	0	OG0014578	GO:0000003,GO:0005576,GO:0005618
TraesCSU02G149400	0	0	0	0	0	0	OG0003092	GO:0005576
TraesCS5D02G173100	0.430598	0.516254	0.219383	0.0727635	0.0801851	0.0570668	OG0021347	GO:0005739	19
TraesCS1B02G274500	0	0	0	0	0.0524919	0	OG0002309	GO:0000003,GO:0005576,GO:0005618
TraesCS4B02G282700	0.190243	0.197496	0.0421563	0.0678986	0.0347807	0.105694	OG0002120	GO:0005618,GO:0005794
TraesCS1D02G038500	0	0	0	0.012468	0	0	OG0017758	GO:0005783,GO:0005794
TraesCS7A02G018900	0	0	0	0	0	0	OG0008564
TraesCS5D02G475100	0	0	0	0	0	0	OG0000630
TraesCS2B02G053300	0.0216952	0.0215395	0.0864809	0.114948	0.289128	0.412559	OG0029222		720
TraesCS5D02G264000	0	0	0	0	0	0.0475974	OG0006298	GO:0000003,GO:0005576,GO:0005618
TraesCS3A02G242400	0.345963	0.385268	0.333963	0.497736	0.218903	0.415769	OG0011835	GO:0000166,GO:0005634	10000
TraesCS6D02G068000	0	0.00836458	0	0	0	0.0373354	OG0000213
TraesCS7D02G352500	2.95839	2.03363	2.46621	3.44389	1.97734	4.15039	OG0007296	GO:0005739	24616
TraesCS1B02G362400	0.694744	1.31359	0.565259	1.13096	0.377388	0.855936	OG0011189		4810
TraesCS6B02G142400	0	0	0	0	0	0	OG0022914
TraesCS6D02G400100	0	0	0	0	0	0	OG0000048	GO:0003677
TraesCS4D02G058100	0.94783	1.04527	1.148	2.12775	0.930986	1.39957	OG0007171	GO:0005488,GO:0005737	14842
TraesCS3B02G301800	0.763792	0.704257	0.541435	1.27284	0.749564	2.53502	OG0023703	GO:0005739	123
TraesCS3A02G038200	0.0423902	0.0118821	0.0742961	0.0610693	0.0923211	0.0609709	OG0019171	GO:0005618
TraesCS7D02G110300	0	0	0	0	0	0	OG0000114	GO:0005488
TraesCS3D02G495400	0.00795908	0.00790197	0	0	0	0	OG0000370	GO:0003677
TraesCS2A02G340000	13.2316	14.1277	16.0046	15.7021	15.3135	9.02833	OG0004093	GO:0005773	1
TraesCS7A02G120800	0	0	0	0	0	0	OG0001521	GO:0003824
TraesCS7B02G452800	0	0	0	0	0	0	OG0001930
TraesCS1B02G346300	1.63817	1.71342	1.97382	2.79229	2.59519	4.92645	OG0020509	GO:0003677,GO:0005634	13
TraesCS5A02G164200	0	0	0	0	0	0.0337834	OG0004980	GO:0005576
TraesCS2D02G244600	0.818028	0.723246	0.940241	0.909767	1.03462	1.16124	OG0010248	GO:0005198,GO:0005618,GO:0005634	8785
TraesCS7A02G214100	0.00289243	0	0.0250857	0.0112192	0.0659408	0.0161644	OG0010842	GO:0005634,GO:0005634,GO:0005730,GO:0005737
TraesCS5B02G569400	0	0	0	0	0	0	OG0011711
TraesCS6B02G197400	0.773878	0.625752	0.439873	0.840154	0.5958	0.660781	OG0003548	GO:0005737	20365
TraesCS2D02G268800	0	0	0	0	0	0	OG0028304
TraesCS1D02G193700	0	0	0	0	0	0	OG0001006
TraesCS2D02G181700	0.141605	0.135951	0.0504256	0.226732	0.146286	1.29595	OG0053804	GO:0005618,GO:0005773	0
TraesCS1A02G153900	3.38118	2.65377	3.06066	3.86994	2.93245	4.07619	OG0004657	GO:0005622,GO:0005634,GO:0005739	3409
TraesCS4A02G400900	0.00660043	0.0198473	0.0105609	0.0384114	0.00450715	0.0475938	OG0017992	GO:0003723,GO:0004518,GO:0005739
TraesCS1B02G267600	0.0309816	0.0185958	0.0272134	0.078661	0.0726884	0.117284	OG0058916	GO:0000003
TraesCS3D02G073900	0	0	0	0	0	0	OG0024512
TraesCS4A02G303600	0	0	0	0	0	0	OG0049790	GO:0005576
TraesCS6A02G089000	2.00142	2.19033	1.73789	2.77124	1.98976	3.35266	OG0003589	GO:0005730,GO:0005783	19294
TraesCS2A02G246000	0.338947	0.303826	0.224651	0.54869	0.252235	0.733692	OG0010221	GO:0005730	6415
TraesCS1A02G240400	0.106998	0.0939504	0.0873058	0.0295992	0.0685078	0.156883	OG0022083	GO:0003676,GO:0005634
TraesCS7A02G280800	0.780579	0.606365	0.673752	0.865822	0.524983	0.595926	OG0002554		376
TraesCS3B02G005400	0	0	0	0	0	0	OG0005774	GO:0005576,GO:0005618,GO:0005783
TraesCS3B02G527900	0	0	0	0	0	0	OG0021149
TraesCS3B02G425800	0.603395	0.478641	0.51071	0.754515	0.374915	0.383116	OG0005338	GO:0005215	11454
TraesCS5B02G169300	2.20729	1.83352	1.66652	2.97426	0.612563	10.4145	OG0052196	GO:0005737	35
TraesCS6B02G348700	0.295998	0.126639	0.230714	0.227734	0.117329	0.938428	OG0012496	GO:0005634,GO:0005768,GO:0005773,GO:0005794	0
TraesCS6B02G137700	0.981115	1.02688	0.71793	1.4696	1.23411	1.54524	OG0019786	GO:0003682,GO:0005794	20230
TraesCS1B02G036100	0	0	0	0	0	0	OG0020951	GO:0005576
TraesCS5D02G160600	0.0443259	0.0933936	0.192313	0.16272	0.145354	0.0936465	OG0003979	GO:0003676,GO:0005622,GO:0005737
TraesCSU02G101000	0.53964	0.461942	0.406224	1.02253	0.601311	1.85488	OG0007169	GO:0005198,GO:0005794	139
TraesCS2D02G029300	0	0	0	0	0.0258532	0.113608	OG0023841
TraesCS3D02G412200	0	0	0	0.00276181	0	0	OG0011829	GO:0005634
TraesCS6D02G321300	0	0	0	0	0	0	OG0000313
TraesCS2D02G327500	0.119027	0.054185	0.0216969	0.0665277	0	0.107745	OG0000345	GO:0003676
TraesCS7D02G439100	0	0	0	0	0	0	OG0024337
TraesCS4D02G233700	0	0.0781339	0.0394532	0.104195	0	0.568394	OG0002811
TraesCS5D02G315800	0.00514096	0.0102082	0	0.00797693	0	0.0278543	OG0004594	GO:0005634
TraesCS6D02G258400	0.0106121	0.010536	0	0.166397	0.0532754	1.02498	OG0017046	GO:0003677,GO:0003700,GO:0005634
TraesCSU02G060800	0	0	0	0	0.0419695	0	OG0021411
TraesCS6A02G307600	0	0	0	0	0	0	OG0022133	GO:0003677,GO:0005634
TraesCS7B02G409900	0	0	0	0	0	0	OG0056811
TraesCS6B02G007300	0.679986	0.97469	0.677885	1.02344	0.514852	1.4255	OG0003800		20012
TraesCS7D02G478200	0	0	0	0	0	0	OG0020710
TraesCS2A02G548000	6.18143	7.20662	4.29863	5.37306	4.46148	2.76851	OG0054836		1
TraesCS7D02G187700	0.639742	0.740593	0.583536	1.05892	0.309971	0.456472	OG0006190		24217
TraesCS6D02G146200	1.04978	1.10588	3.12719	1.73328	3.74918	5.13638	OG0005787		21221
TraesCS3A02G360900	0	0	0	0.0108863	0	0	OG0019368	GO:0003700
TraesCS1D02G244400	4.05422	4.00727	2.52119	3.89926	2.25125	3.5931	OG0052358	GO:0005576,GO:0005764	17
TraesCS5A02G256200	0.376995	0.778866	0	1.64741	0.304226	6.86467	OG0013866	GO:0005576	786
TraesCS4A02G137500	0.610589	0.743654	0.540845	0.92317	0.650866	1.39434	OG0024309	GO:0003677,GO:0003700,GO:0005634	13152
TraesCS4B02G186400	0.830745	0.482321	0.65885	1.4984	0.74072	2.39326	OG0003422	GO:0005768	14270
TraesCS2D02G111800	0	0	0	0	0	0	OG0023804
TraesCSU02G123400	0.512064	0.543758	0.348653	0.764904	0.514342	0.974195	OG0009863		25178
TraesCS3D02G441000	0.226451	0.61274	0.579221	0.685494	0	1.16811	OG0000366	GO:0005634	12672
TraesCS2D02G521200	0	0	0	0	0	0	OG0023513	GO:0005102,GO:0005739
TraesCS3A02G072400	4.2043	3.22591	2.5959	6.3814	4.41424	9.03957	OG0024043	GO:0005622	1055
TraesCS4B02G110400	0.378106	0.358505	0.234087	0.604041	0.332839	0.86335	OG0008583	GO:0005576	14079
TraesCS1D02G111300	6.29019	6.95	6.00987	7.29478	6.08679	6.48676	OG0004445	GO:0005739	2038
TraesCS2B02G325400	0	0	0	0	0	0	OG0000421	GO:0005488
TraesCS2D02G574400	0	0.00414576	0	0.00620271	0	0	OG0004814	GO:0005634
TraesCS1B02G031000	3.75863	3.84814	3.26963	3.38286	3.94147	1.9627	OG0015767	GO:0003676,GO:0003824,GO:0005634	854
TraesCS7B02G156100	0.632709	0.730764	0.44595	1.02191	0.612745	0.998903	OG0002986	GO:0003677	1417
TraesCSU02G091000	0	0	0	0	0	0	OG0046259
TraesCS1B02G256800	0	0	0	0	0	0	OG0008547
TraesCS7A02G316400	0	0	0	0	0	0	OG0000039
TraesCS2A02G224500	2.73653	2.04906	1.60613	2.74624	1.89627	2.91208	OG0009809	GO:0005737	6364
TraesCS7A02G356639	0.0808924	0.0975401	0.407754	0.535107	0.573256	8.79724	OG0018666		0
TraesCS3D02G060300	0	0	0	0	0	0	OG0000566
TraesCS7A02G303200	0	0	0	0	0.0229339	0.011015	OG0052048	GO:0005739
TraesCS3B02G609800	0.216472	0.504035	0	0.365071	0.396963	0.4962	OG0004488		11725
TraesCS5A02G489900	0	0	0	0	0	0	OG0001703	GO:0003824,GO:0005515,GO:0005622
TraesCS5B02G088600	0	0.0339577	0.0996107	0	0.0873651	1.05642	OG0008438	GO:0005773
TraesCS3B02G575500	5.2153	4.54219	5.60974	15.2015	6.58374	38.66	OG0002751		0
TraesCS5D02G060300	2.49674	3.44216	4.73761	3.30194	0.678432	0.896148	OG0020343	GO:0005634	22
TraesCS6A02G360000	1.68602	1.55631	1.66252	1.82323	1.69355	2.26595	OG0007997	GO:0005576	19892
TraesCS4B02G315800	0	0	0	0	0	0	OG0026716
TraesCS1D02G014500	0	0	0	0	0	0	OG0000101	GO:0005488
TraesCS3A02G085800	0	0	0	0	0	0	OG0017362
TraesCS3A02G140600	4.89769	4.95242	4.1169	2.23033	6.12778	0.920399	OG0016061	GO:0005102	1
TraesCS6B02G107100	0	0	0	0	0	0	OG0022302
TraesCS7B02G128200	0.0658569	0.0824549	0.152108	0.156585	0.0609896	0.107295	OG0010662	GO:0003676,GO:0003824,GO:0005654
TraesCS5B02G169800	0	0	0	0	0	0	OG0000983
TraesCS6A02G137100	2.83137	2.36429	1.78392	1.90491	1.79077	2.3405	OG0023971	GO:0003824,GO:0005576,GO:0005622	208
TraesCS1B02G099700	0.0783916	0.0531243	0.0632753	0	0.0638258	0	OG0021873
TraesCS2D02G199500	0.833581	0.942616	0.773854	1.50578	0.969902	2.09634	OG0053684	GO:0005654	8681
TraesCS2D02G476700	0	0	0	0	0	0	OG0002963	GO:0005739
TraesCS6A02G024900	2.59711	1.91053	1.93304	3.01933	2.23712	3.69791	OG0046024	GO:0003676,GO:0005654,GO:0005730	19186
TraesCS7B02G147300	0	0	0	0	0	0	OG0017640	GO:0005618,GO:0005730
TraesCS6B02G061200	0	0	0	0	0	0	OG0013315
TraesCS1A02G060800	0	0	0	0	0	0	OG0000188	GO:0005634
TraesCS5B02G366900	1.23364	0.496112	0.274462	0.828481	0.116546	0.762032	OG0023323		17521
TraesCS3A02G303600	1.36867	1.42073	1.69112	2.26701	0.797672	2.53973	OG0015705		2501
TraesCS6D02G042000	0.587096	0.233078	0.338289	0.299419	0.200428	0.052022	OG0001932		21021
TraesCS4A02G175600	248.588	277.151	341.019	724.255	401.233	681.196	OG0006479		4
TraesCS1D02G067703	0	0	0	0	0	0	OG0004574	GO:0005488
TraesCS2A02G235500	0.221353	0.276807	0.170551	0.359604	0.214685	0.345925	OG0000478	GO:0005773
TraesCS5A02G387400	0	0	0	0	0	0	OG0001701	GO:0003677,GO:0003700,GO:0005634
TraesCS2D02G075800	0.750257	0.588236	0.595353	0.948123	0.651138	0.990636	OG0006543	GO:0003677,GO:0003824,GO:0005634,GO:0005737	8415
TraesCS3D02G006900	0	0	0	0	0	0	OG0045836
TraesCS3D02G242600	0.258782	0.425642	1.45811	0.782951	1.35729	0.670325	OG0002266	GO:0005488	12266
TraesCS7A02G397000	0	0	0	0	0	0	OG0053305	GO:0005739
TraesCS1A02G339900	1.77585	1.70279	1.91962	2.93592	2.27934	5.72006	OG0044499	GO:0005764	0
TraesCS4A02G156900	0.730985	0.578081	0.770892	0.726742	0.808571	0.45088	OG0017947		1
TraesCS6A02G340700	1.43345	1.03287	1.34259	1.84677	1.21177	2.66948	OG0047281	GO:0003676	19858
TraesCS3D02G393200	35.2628	27.9185	29.5547	31.3173	40.3133	30.2022	OG0015531	GO:0005739,GO:0005773,GO:0005783	12582
TraesCS5B02G181000	1.67098	1.67119	1.47859	1.49102	1.39692	1.80396	OG0023939	GO:0003676	17139
TraesCS7A02G556700	0.751656	1.2881	0.989784	2.64563	0.726427	2.06599	OG0024087		22918
TraesCS6B02G070500	0.615979	0.695926	0.5056	0.57899	0.327097	0.344326	OG0000611		2837
TraesCS1A02G254600	0.198244	0.135981	0.546923	0.3887	0.270054	0.060316	OG0055183	GO:0005618	3672
TraesCS4B02G261700	0.789491	0.635667	0.579482	0.86373	0.805238	1.56778	OG0010718	GO:0005737	723
TraesCS4B02G102700	0.581308	1.23321	0.998073	1.88719	0.664123	1.00662	OG0009307	GO:0003677,GO:0005634	14066
TraesCS4B02G100200	0.233055	0.106837	0.478687	0.24315	0.191026	0.0616655	OG0000084	GO:0005783,GO:0005794	14059
TraesCS2B02G400600	8.6148	10.342	7.58525	13.1317	7.20601	23.42	OG0002573	GO:0003676,GO:0005198,GO:0005730,GO:0005773,GO:0005783	5
TraesCS3D02G136600	1.69873	1.92104	2.08958	2.8981	2.0014	2.36965	OG0011257	GO:0003700,GO:0005634	11975
TraesCS2A02G579600	0	0	0	0	0	0	OG0013198
TraesCS6D02G175200	0	0	0	0	0	0	OG0044515	GO:0003723,GO:0005198
TraesCS3A02G292500	0.0843068	0	0	0	0	0	OG0019167
TraesCS7D02G390400	0.0148971	0	0	0.0543245	0	0.0789437	OG0010646	GO:0005773
TraesCS6A02G091900	0	0.0591244	0	0.134661	0	0	OG0022760	GO:0003824,GO:0005768,GO:0005773
TraesCS5A02G066800	0.0804205	0.0510178	0.030061	0.0176337	0.0256587	0.0663423	OG0001647	GO:0003677,GO:0005634
TraesCS1A02G121500	0.161798	0.215839	0	0.110997	0.0636226	0	OG0016398	GO:0003700,GO:0005634
TraesCS5A02G107600	2.03913	1.69057	1.97459	2.37689	2.05741	2.45284	OG0013922	GO:0003824,GO:0005622	15749
TraesCS4A02G385200	0	0	0	0	0	0	OG0001530
TraesCS2A02G008500	0	0	0	0.0077942	0	0	OG0052703
TraesCS2D02G011400	0.00830267	0.0100783	0	0.0263105	0	0.141685	OG0003943	GO:0000166,GO:0003677,GO:0005634
TraesCS1A02G115500	0.722749	0.537644	1.07485	1.01528	1.43754	1.21861	OG0011280		1804
TraesCS4D02G223100	0	0	0	0	0	0	OG0058201	GO:0005783
TraesCS2A02G466600	0	0	0	0	0.045855	0	OG0017689
TraesCS6A02G331900	2.78253	3.40193	1.69225	2.83107	1.72306	2.26196	OG0005236		879
TraesCS3A02G433900	0.211956	0.111611	0.107191	0.147523	0.293875	0.024175	OG0005562	GO:0003723,GO:0005634,GO:0005737
TraesCS7D02G135200	0	0	0	0	0	0	OG0001035	GO:0003677
TraesCS6B02G420600	0	0	0	0	0	0.0550575	OG0000759	GO:0005488,GO:0005622
TraesCS4A02G384200	0.682778	1.12911	1.5385	2.75998	0.32703	3.95116	OG0000295		13671
TraesCS5D02G033800	2.50333	2.67674	2.25785	3.30015	1.86502	4.94342	OG0013762		17963
TraesCS1D02G156500	0	0	0	0	0	0	OG0059147
TraesCS6B02G182300	1.05879	1.36175	1.26453	1.578	1.92777	2.08318	OG0012136		20327
TraesCS2A02G299300	0	0	0	0	0	0	OG0019556
TraesCS3A02G468500	0	0	0	0	0	0	OG0049363	GO:0005794
TraesCS5B02G029000	26.2114	22.9576	29.5573	17.1154	31.0324	3.42845	OG0008795		1
TraesCS5D02G125700	18.2678	25.7228	18.4921	51.0033	18.8044	70.0841	OG0000515		4
TraesCS7A02G515300	0	0	0	0	0	0	OG0017634
TraesCS6D02G199100	1.43524	1.02199	2.48079	3.62441	4.2559	21.4092	OG0001984	GO:0003723	75
TraesCS6B02G308300	0	0	0	0	0	0	OG0001236	GO:0005488,GO:0005576,GO:0005618,GO:0005634,GO:0005764,GO:0005773,GO:0005783
TraesCS1A02G338200	0.292945	0.21761	0.257594	0.371517	0.141877	1.07686	OG0058996		9
TraesCS3B02G572800	0	0	0	0	0	0	OG0001535	GO:0005654
TraesCS5D02G356600	0	0	0	0	0	0	OG0000348	GO:0005488
TraesCS2B02G335200	0.48466	0.271344	0.173507	0.375925	0.28858	0.603689	OG0014387	GO:0005488	7771
TraesCS3A02G185500	4.58557	3.30876	2.80805	7.67976	2.73249	6.92909	OG0015722	GO:0005777,GO:0005783	844
TraesCS2B02G540700	0	0	0	0	0	0	OG0003077	GO:0005634
TraesCS2B02G484200	0.167474	0.180123	0.329164	1.19568	0.210572	4.11108	OG0009537	GO:0005634,GO:0005777	0
TraesCS7A02G526000	0	0	0	0	0	0	OG0014910
TraesCS7D02G193600	0.101398	0.191474	0.184932	0.191964	0.136365	0.371111	OG0007080	GO:0005488,GO:0005794
TraesCS2D02G062700	0	0	0	0	0	0	OG0014039
TraesCS2B02G542200	5.99764	5.44353	7.10472	4.44869	7.95153	5.29308	OG0009510		2
TraesCS7A02G186500	0	0	0	0	0	0	OG0023664	GO:0003677,GO:0005634
TraesCS3D02G494000	12.1491	13.9181	8.47563	22.3775	7.76681	24.3673	OG0004426	GO:0005634	2715
TraesCS7D02G523900	0	0	0	0	0.143143	0.0976588	OG0002406	GO:0005576
TraesCS2B02G175400	0.538959	0.574208	0.732448	0.735106	0.487746	0.794426	OG0014914	GO:0003676,GO:0005634,GO:0005739,GO:0005777	7376
TraesCS5A02G524700	0.0127426	0.00256815	0.0113118	0.00374863	0.030001	0.0300962	OG0027396	GO:0003677,GO:0005634
TraesCS5B02G074200	0.00164321	0.00174675	0	0.0103065	0	0	OG0008792	GO:0003774
TraesCS3A02G258000	0.363201	0.300019	0.278573	0.430986	0.478566	1.45061	OG0052828		9
TraesCS1D02G298100	0.0067501	0.00670167	0.0196585	0.042338	0.0145899	0	OG0015035
TraesCS2D02G411400	0	0	0	0	0	0	OG0053920	GO:0003824,GO:0005773,GO:0005794
TraesCS3B02G589300	0.0419399	0.0226287	0.0779271	0.0556429	0.0645618	0.0559951	OG0003838
TraesCS6D02G347800	0	0	0	0	0	0	OG0020810	GO:0003676,GO:0005515
TraesCS3B02G117100	0	0	0	0.0958071	0	0	OG0054029
TraesCS7A02G071100	607.944	599.493	249.342	252.017	176.199	127.933	OG0002104		395
TraesCS2A02G284400	15.6393	16.8317	13.4578	17.8045	11.1593	19.4692	OG0003287		200
TraesCS6D02G015800	0.117672	0.0878921	0.116961	0.0412621	0.402698	0	OG0000422	GO:0000166
TraesCS5B02G325200	0.49836	0.489641	0.731808	0.820993	0.435772	0.979421	OG0006198	GO:0005622,GO:0005634,GO:0005737	17450
TraesCS5B02G342000	0	0	0	0	0	0	OG0054005	GO:0005576,GO:0005618,GO:0005783
TraesCS4B02G247500	0	0.195751	0	0.0887968	0	0.178228	OG0057480	GO:0003677,GO:0005634
TraesCS1A02G057100	1.2131	0.953222	1.39261	1.40962	1.62557	1.17708	OG0001664		3222
TraesCS5D02G085600	0	0	0	0	0	0	OG0014009	GO:0003723
TraesCS5D02G181600	50.397	57.8613	74.2993	36.6902	38.6566	8.34628	OG0006430		1
TraesCS6B02G210300	0	0	0	0	0	0.121406	OG0007359	GO:0003677,GO:0003700,GO:0005634
TraesCS1D02G112300	45.3745	38.3924	38.6268	24.3254	36.6266	4.5859	OG0003544	GO:0005654	1
TraesCS5A02G222200	0.0719827	0.094321	0.12687	0.0663867	0.030108	0.139867	OG0005024
TraesCS2B02G230200	1.91429	1.54948	1.1852	1.71241	1.21887	3.16867	OG0002744	GO:0005768	7509
TraesCS7A02G444600	0.639068	0.480596	0.480953	0.662067	0.656662	0.45214	OG0001393	GO:0003677,GO:0005634	422
TraesCS1B02G220200	0.633798	0.495762	0.576004	0.650948	0.647601	0.644043	OG0012165	GO:0005634,GO:0005768	4512
TraesCS7B02G015600	5.11088	4.87624	3.10096	3.61338	2.88942	2.40762	OG0000329	GO:0005488,GO:0005622	23
TraesCS6A02G310700	0	0	0	0	0	0	OG0013472	GO:0005768,GO:0005783
TraesCS7A02G298600	0.584981	0.235844	0.496863	1.93557	1.50499	9.95151	OG0058061	GO:0005768,GO:0005783	0
TraesCS4D02G166300	0.752595	0.72848	0.657532	0.674387	0.756055	0.95595	OG0057849	GO:0005488,GO:0005634	15085
TraesCS5D02G508900	0.655067	0.838999	0.563257	1.2875	0.750461	1.34119	OG0005471	GO:0005515,GO:0005634,GO:0005737	19035
TraesCS7D02G127100	0.0379132	0.0523443	0	0.0263252	0.0211955	0.0199955	OG0010330	GO:0003682,GO:0003723
TraesCS4A02G097600	0	0	0	0	0.0591767	0	OG0000946
TraesCS1A02G391000	1.60812	1.64309	1.38819	2.3461	1.6168	4.27775	OG0002872	GO:0005794	165
TraesCS6B02G235900	1.08795	0.888325	0.811423	1.22134	0.839917	1.05087	OG0016656	GO:0003677	20449
TraesCS4B02G257100	0	0	0	0	0	0	OG0023699	GO:0003676,GO:0005739
TraesCS5D02G450000	0.0343534	0	0	0.104333	0	0	OG0006671
TraesCS3B02G294000	0.116258	0.225095	0	0.331449	0.513256	0.21645	OG0015751
TraesCS4D02G180100	0.159467	0.342154	0	1.36766	1.31605	7.18865	OG0014908	GO:0003676,GO:0003824	0
TraesCS1D02G173600	0.660126	0.557492	0.459853	1.04304	0.607027	0.40373	OG0017026		5363
TraesCS7D02G426900	0.134593	0.261631	0.119902	0.135267	0	0	OG0000723
TraesCS7A02G213600	0	0	0	0.00523085	0	0.0182654	OG0008895	GO:0005654
TraesCS6D02G258800	0	0	0.0285809	0	0	0	OG0023515
TraesCS6A02G400400	0.05956	0.12222	0.16891	0.339601	0	0.196556	OG0001695
TraesCS7A02G555100	0	0	0	0	0	0	OG0003190
TraesCS6D02G158400	0.160163	0.0726607	0.0753963	0.275662	0.188702	0.509171	OG0001859		21256
TraesCS2B02G173200	0	0	0	0	0	0	OG0010260	GO:0005576
TraesCS3D02G144200	0.775779	1.02396	0.997218	1.92494	1.23326	3.0821	OG0011500	GO:0005783	11987
TraesCS7D02G182400	0	0	0	0	0	0	OG0024418
TraesCS2B02G477700	1.28925	0.833738	0.829272	0.940051	0.812095	0.56107	OG0023577	GO:0005634,GO:0005768	129
TraesCS7A02G295200	0	0	0	0	0	0	OG0028604
TraesCS6D02G080300	0	0	0	0.188044	0	0.415098	OG0023671	GO:0005488
TraesCS6B02G260300	0	0	0	0	0	0	OG0023119
TraesCS7A02G197600	0	0	0	0	0	0	OG0003092	GO:0005576,GO:0005634,GO:0005737
TraesCS3B02G391600	0.634807	0.736797	4.99763	1.0011	9.56618	0.522306	OG0011638	GO:0005768,GO:0005794	2
TraesCS6B02G378000	0	0	0	0	0	0	OG0012519	GO:0005576
TraesCS1B02G256600	1.35881	1.16951	1.16409	1.54103	0.921012	2.02298	OG0048806	GO:0005622,GO:0005634,GO:0005739	4601
TraesCS1B02G422100	0.0148346	0	0	0	0	0	OG0000580	GO:0005618,GO:0005622
TraesCS5A02G088800	2.09879	1.96917	2.49051	2.39897	2.3047	0.552074	OG0007929		15688
TraesCS7B02G055200	0	0.0149274	0.0311125	0.481438	0.309531	13.7566	OG0005890		0
TraesCS4B02G025500	5.3259	5.30386	4.17972	4.73349	4.80318	4.32575	OG0002039	GO:0003700,GO:0005634	15
TraesCS7A02G022100	0	0	0	0	0	0	OG0023202
TraesCS7D02G335000	5.20673	8.85634	5.97094	13.741	5.32293	20.6205	OG0003447	GO:0005198,GO:0005730	5
TraesCS2A02G438000	0	0	0	0	0	0	OG0000030
TraesCS1B02G126900	27.091	31.9374	30.4757	22.8492	35.481	5.33061	OG0001861		1
TraesCS1B02G248000	7.41988	7.77945	7.49818	12.931	8.73046	23.472	OG0001010	GO:0003677,GO:0005576,GO:0005634,GO:0005794	3
TraesCS3D02G242400	0.872842	0.848951	0.643787	1.1366	0.554903	1.24087	OG0011835	GO:0000166,GO:0005634	12265
TraesCS7A02G177300	0	0	0	0.0619435	0	1.6136	OG0001995	GO:0005737
TraesCS7A02G522800	0	0	0	0	0	0	OG0005350
TraesCS3A02G066100	0	0	0	0	0	0	OG0000457	GO:0005737
TraesCS7A02G466400	0	0	0	0	0	0	OG0002446
TraesCS1A02G150900	0.210538	0.210333	0.0955505	0.1764	0.333245	0.202947	OG0001873		467
TraesCS1D02G453700	1.17897	1.18588	2.22758	2.99403	2.1797	7.39246	OG0005604	GO:0003824	0
TraesCS1A02G027600	0.103949	0.160079	0.155118	0.207784	0.166235	0.168307	OG0024335	GO:0003723,GO:0005730,GO:0005773,GO:0005794
TraesCS3D02G142100	3.33629	3.06997	3.0363	2.63417	4.78236	1.68597	OG0011182	GO:0005739	2
TraesCS5D02G498300	5.54207	10.0914	5.17929	12.0761	0.222559	1.82057	OG0023790	GO:0005576	16
TraesCS2D02G037100	0.022312	0	0	0	0	0.0329457	OG0029122	GO:0005618
TraesCS2A02G514000	0	0	0	0	0	0	OG0009586	GO:0003700,GO:0005634
TraesCS4B02G182800	0.136697	0.0173328	0.070185	0.0500554	0.0754509	0	OG0000007	GO:0003676,GO:0005737
TraesCS3B02G374600	0.0780443	0.0481023	0.167059	0.0669333	0.170753	0.435272	OG0015580	GO:0005634,GO:0005737	2070
TraesCS2B02G166100	1.00238	0.814948	0.989951	1.84982	1.01588	3.3216	OG0010664		6
TraesCS2B02G217700	1.24943	1.09349	1.00787	1.35307	0.976983	0.94428	OG0008075		1158
TraesCS5B02G454100	0.107432	0.0616733	0.0319976	0.120166	0.105558	0.228162	OG0000152
TraesCS4A02G308800	0	0	0	0	0	0	OG0055704	GO:0005783
TraesCS1D02G198500	3.9774	3.81302	2.55041	9.13357	3.46613	17.4274	OG0012916	GO:0005634,GO:0005783	0
TraesCS5B02G454700	0.0854395	0.105859	0.0602017	0.103425	0.12057	0.177423	OG0000152
TraesCS3B02G285500	5.61102	5.54313	6.64931	4.20376	3.8642	1.33227	OG0011769		27
TraesCS1D02G441200	0	0	0	0	0	0	OG0029265	GO:0003676,GO:0003700,GO:0005634
TraesCS6B02G361100	0.02393	0.0628803	0.0302716	0.0734692	0	0.139354	OG0007984
TraesCS3A02G264100	0.880628	0.624916	0.489585	1.2638	0.643415	1.69577	OG0012035	GO:0005634	107
TraesCS5B02G507900	0	0	0	0	0	0	OG0006904	GO:0000003,GO:0005488
TraesCS3B02G372600	0.160365	0.168069	0.626309	0.693252	1.25525	1.41896	OG0000625	GO:0005634	11342
TraesCS4D02G243800	5.34145	5.4143	2.52607	3.42939	2.18415	1.28373	OG0020151		17
TraesCS2B02G040800	0	0	0	0	0.00228433	0	OG0029283	GO:0005739
TraesCS4D02G305600	0	0	0	0	0	0	OG0001306	GO:0005654,GO:0005737
TraesCS7D02G141200	0	0	0	0	0	0	OG0008557
TraesCS1D02G278400	7.83464	4.15144	6.06346	6.86716	5.71581	8.13535	OG0002884	GO:0005773	336
TraesCS3A02G276400	0.351699	0.677501	0.336549	0.460939	0.49825	0.652254	OG0011884	GO:0003723	576
TraesCS3A02G267200	0	0.00928458	0	0	0	0.0291246	OG0009383	GO:0005488
TraesCS7D02G009800	0	0	0	0	0	0	OG0021083	GO:0003677,GO:0003824,GO:0005634
TraesCS7B02G374500	0	0	0	0	0	0	OG0017366
TraesCS1B02G016700	0	0	0	0	0	0	OG0002310	GO:0003824,GO:0005773
TraesCS7D02G364400	5.25518	5.42575	4.48154	7.27569	5.49277	8.81536	OG0058089	GO:0005730	24641
TraesCS1A02G079800	0.817153	0.605949	2.3052	1.30516	4.57599	1.29829	OG0005595	GO:0005488,GO:0005635,GO:0005654	7
TraesCS7A02G469400	0.0132204	0.0156348	0.011736	0.0230017	0	0.00780617	OG0029324
TraesCS5D02G002400	0	0.00802169	0	0.0373404	0	0.0251631	OG0008665	GO:0005768
TraesCS5D02G072600	1.06833	0.882945	1.17904	1.32833	0.909439	1.25558	OG0001837	GO:0005654	18051
TraesCS3A02G019400	0.132674	0.162206	0.221932	0.32618	0.438707	0.653317	OG0008472		9513
TraesCS7A02G160200	0	0.124988	0.846758	0.170927	1.99328	0.108723	OG0014943
TraesCS3D02G115200	0	0	0	0.107187	0	0	OG0000230	GO:0005634
TraesCS5B02G230900	0	0	0	0	0	0	OG0047076	GO:0005488
TraesCS3B02G584100	0	0	0	0	0	0	OG0000717	GO:0003676
TraesCS1D02G142300	0.494922	0.645277	0.624826	0.86853	0.814546	0.804243	OG0012868	GO:0000166,GO:0003676,GO:0005634,GO:0005730	5289
TraesCS7A02G155400	0.0404163	0.0157792	0	1.15687	0	4.0591	OG0001388
TraesCS2B02G433800	0	0	0	0	0	0	OG0009315
TraesCS4D02G188900	0	0	0	0	0	0	OG0003524
TraesCS2B02G440600	1.76048	0.634623	0.528919	1.42852	0.844507	1.45221	OG0024462	GO:0005488	7997
TraesCS1B02G013900	1.3382	1.44228	1.47513	1.9591	1.54128	3.19112	OG0011672	GO:0000166,GO:0005737	4057
TraesCS6B02G073400	0	0	0	0	0	0	OG0002761
TraesCS6A02G240600	5.16222	4.48476	6.92908	4.68037	5.52675	2.09441	OG0055062	GO:0005739	1
TraesCS5A02G358200	2.89267	3.54643	3.42866	4.42713	3.40937	7.43364	OG0008860	GO:0005215,GO:0005739	340
TraesCS2B02G208900	0.0187688	0.0239643	0.0150019	0.0741884	0.0577303	0.395134	OG0010975		147
TraesCS5B02G127900	0.966369	0.898079	1.06432	1.03412	1.52163	0.799696	OG0057275	GO:0005215	16991
TraesCSU02G052100	0.785169	0.546021	1.21604	0.813223	1.44115	1.04675	OG0000007	GO:0005737	7
TraesCS2D02G467600	1.24998	1.0865	1.0721	0.859883	1.12442	0.724547	OG0014284	GO:0003676,GO:0004518,GO:0004518,GO:0005654,GO:0005730,GO:0005739	9276
TraesCS1D02G384700	1.15658	0.872468	1.00844	1.03067	0.94736	1.25223	OG0009595	GO:0003676	5826
TraesCS2D02G581800	0	0.040513	0	0	0	0.550095	OG0001551	GO:0003676
TraesCS1B02G411100	0.0251245	0.0259534	0	0.566481	0.0803981	1.4329	OG0045255		144
TraesCS6D02G204700	2.52759	1.83127	2.32333	2.56162	1.95504	1.75044	OG0008085	GO:0005634,GO:0005783,GO:0005794	513
TraesCS4B02G048900	0	0.0996148	0.118358	0.10569	0	0	OG0000535	GO:0005634,GO:0005737
TraesCS6A02G352400	0.725563	1.36489	0.869575	1.51315	1.50433	1.05736	OG0019459		19879
TraesCS6A02G078900	1.89535	1.86013	2.43241	1.95512	1.81923	2.35941	OG0012507		19274
TraesCS3D02G100500	0	0	0	0	0	0	OG0000551	GO:0003677,GO:0005634
TraesCS4A02G347900	0.102124	0.11404	0.0902043	0.268782	0.0270333	0.324413	OG0023834	GO:0005634
TraesCS2D02G026500	0	0	0	0	0	0	OG0000381
TraesCS3D02G170400	0.912124	1.32767	0.984961	2.26973	0.510106	1.31501	OG0001207	GO:0003676,GO:0005739	12057
TraesCS1A02G249900	0	0	0	0.0115599	0	0.0227219	OG0029081	GO:0005634,GO:0005737
TraesCS4A02G085800	0	0	0	0	0	0	OG0008369
TraesCS2A02G070600	0.129491	0.0860374	0.271159	0.230565	0.490476	0.171791	OG0013421		48
TraesCS1D02G264700	6.63646	8.28084	19.8814	18.0236	19.2615	15.6863	OG0048379		1857
TraesCS7A02G011500	0	0	0	0	0	0	OG0000422
TraesCS5A02G012200	6.44633	3.81218	4.78626	7.67714	4.3052	11.8204	OG0004303		15516
TraesCS1A02G317900	0.0324725	0.0186886	0	0	0	0	OG0003687	GO:0005576,GO:0005634,GO:0005737
TraesCS6A02G048200	0.155027	0.116747	0.143051	0.193875	0.226673	1.73268	OG0023523	GO:0005488	9
TraesCS5B02G472900	0	0	0	0	0	0	OG0018129
TraesCS1B02G255600	0.25207	0.0984963	0.0965206	0.167447	0.10052	0.252004	OG0001171		4599
TraesCS2A02G354400	0	0	0	0	0	0	OG0006580
TraesCS5D02G484800	3.15186	2.99098	2.41007	3.40166	2.4041	3.26707	OG0015122		18987
TraesCS4D02G348100	0	0	0	0	0	0	OG0003737	GO:0003677,GO:0003700,GO:0005634
TraesCS3D02G054400	0.219933	0.169847	0.483299	0.329383	0.534444	0.399202	OG0011533	GO:0005634	102
TraesCS2B02G377900	0.0288756	0.0318447	0	0.168636	0.0466038	0.448918	OG0054191	GO:0005622,GO:0005634	171
TraesCS4D02G085400	1.73614	2.71272	2.18306	1.89905	1.75376	0.457804	OG0008965	GO:0005794	14903
TraesCS4A02G321600	0.0386931	0.0184789	0.291575	1.51224	1.37255	12.1719	OG0053717	GO:0005618,GO:0005773	0
TraesCS1B02G246900	0.0270945	0	0	0	0	0	OG0011498
TraesCS3B02G229700	0.322212	0.343482	0.296238	0.488508	0.552156	0.964468	OG0002899		1086
TraesCS5A02G250000	0	0	0	0	0	0	OG0024015
TraesCS7D02G331300	0	0	0	0	0	0	OG0027133
TraesCS3D02G165100	0	0	0	0.00631166	0	0.0171294	OG0002630	GO:0003677,GO:0005634
TraesCS5B02G238300	0	0.00764619	0	0.0681454	0	0.416261	OG0000849
TraesCS3B02G521800	0	0	0	0	0	0	OG0058137	GO:0003824,GO:0005737
TraesCS2B02G499400	0.495505	0.390183	0.221327	0.578089	0.377842	0.877433	OG0017745	GO:0005739	8109
TraesCS7A02G526400	0	0	0	0	0	0	OG0000251	GO:0005739
TraesCSU02G092500	0.0606265	0.0653753	0.088072	0.036578	0.0199446	0.0755673	OG0000498
TraesCS5A02G280600	0	0	0	0	0	0	OG0024405	GO:0003677,GO:0003824,GO:0005634
TraesCS4A02G379800	0	0	0	0.0107141	0.0184238	0	OG0000146
TraesCS4B02G112200	0.265868	0.326096	0.247486	0.567939	0.175677	0.624189	OG0014033	GO:0003824	14085
TraesCS2A02G100000	0.0687974	0.132253	0.0210356	0.203654	0.0564452	0.0594126	OG0005495	GO:0005634
TraesCS3D02G146000	0.0225098	0.0213721	0	0	0.026554	0	OG0048084	GO:0005576,GO:0005618,GO:0005773
TraesCS3B02G531500	7.49005	4.82358	11.4406	12.1143	7.94587	2.5487	OG0000970		1588
TraesCS6B02G433700	0	0	0	0.0935738	0	0	OG0002350	GO:0005737
TraesCS5D02G194400	0	0	0	0	0	0	OG0001026	GO:0005794
TraesCS5B02G212500	0.0214277	0.0440519	0.108425	0.197354	0	0.116098	OG0006186	GO:0005515,GO:0005634,GO:0005777
TraesCS4D02G228800	0	0	0	0	0	0	OG0000594	GO:0005634
TraesCS3D02G542000	0	0	0	0	0	0	OG0020219
TraesCS3A02G246000	1.26812	0.93395	0.730408	2.31373	0.834398	6.66803	OG0003590	GO:0003677,GO:0005634	0
TraesCS2B02G173600	0	0	0	0	0	0	OG0000882
TraesCS6A02G282800	0.00537165	0.00652047	0	0	0.0116104	0.0167293	OG0019726	GO:0005634,GO:0005739
TraesCS5D02G058500	0	0	0	0	0	0	OG0007024	GO:0005634,GO:0005737
TraesCS5A02G169100	0	0	0	0	0	0	OG0002268	GO:0003723,GO:0005730
TraesCS5B02G077200	2.36894	2.19738	2.32756	2.9056	2.19388	2.76572	OG0052779	GO:0005488	16839
TraesCS2D02G385500	0	0	0	0	0	0.12913	OG0001709	GO:0003676,GO:0003700,GO:0005634
TraesCS2B02G116200	0	0	0	0	0	0	OG0020871	GO:0000003,GO:0005618
TraesCS3A02G450300	0	0	0	0	0	0	OG0002399
TraesCS6D02G175000	0	0	0	0	0	0	OG0004323	GO:0005198
TraesCS1A02G008000	0	0	0	0	0	0	OG0003905
TraesCS2A02G395200	0	0	0	0	0	0	OG0014153
TraesCS6B02G137000	0	0	0	0	0	0	OG0023023
TraesCS7A02G036700	0.0307907	0.0405094	0	0.0218272	0.0175332	0	OG0000724	GO:0005737
TraesCS7B02G356400	0	0	0	0	0.0245524	0	OG0028054	GO:0005515
TraesCS7D02G026700	0.981078	0.830328	0.886722	1.47635	1.08763	2.08209	OG0055632		119
TraesCS2A02G223000	4.36177	3.70656	3.87481	5.03572	3.91228	4.36347	OG0018479	GO:0000166,GO:0003676	1246
TraesCS5B02G515100	49.0565	48.3963	44.7108	105.549	42.6018	85.4518	OG0015129	GO:0003824	787
TraesCS5D02G447300	0.58711	0.966949	0.388777	0.960864	0	0.0479902	OG0002745		18920
TraesCS2B02G555900	0	0	0	0	0	0	OG0028435
TraesCS2D02G478000	0.0161039	0.047965	0.0815587	0.148849	0.467516	0.738531	OG0004270	GO:0005783	316
TraesCS4A02G458400	0.594673	0.778009	0.73689	0.729873	0.993549	1.07115	OG0054580	GO:0005768,GO:0005773,GO:0005794	13778
TraesCS4B02G136100	4.34378	4.23991	3.75473	7.95143	5.19399	12.302	OG0049225	GO:0003824,GO:0005198,GO:0005773,GO:0005794	41
TraesCS4B02G108200	2.49888	2.68457	2.93446	2.75509	2.29963	0.510161	OG0008839		1
TraesCS1D02G041100	0	0	0	0	0	0	OG0000039
TraesCS4D02G156100	11.7028	12.8205	18.7116	11.334	12.4192	1.70616	OG0009918	GO:0003677,GO:0003723,GO:0003824	1
TraesCS1A02G224800	2.70448	2.96172	2.37245	4.35978	2.0339	4.65809	OG0002173	GO:0005635	3600
TraesCS5B02G558800	0.0134886	0	0	0.0133642	0	0	OG0005506	GO:0005634,GO:0005737
TraesCS1A02G211000	4.55884	7.15246	5.5219	7.36739	8.41538	4.05226	OG0002657		1836
TraesCS1D02G191000	0.021023	0	0	0.015793	0.0254598	0	OG0013003	GO:0003700,GO:0005634
TraesCS4D02G260500	1.2048	1.15355	0.975066	1.9751	1.26489	3.68479	OG0009903		94
TraesCS7D02G415500	0.152244	0.131421	0.203971	0.312489	0.251405	0.715732	OG0002106		345
TraesCS5B02G160700	0.0878442	0.0460735	0.0855462	0.075704	0.148952	1.93862	OG0047310		0
TraesCS7A02G512600	0.0862623	0	0	0	0.212718	0	OG0052286
TraesCS7D02G284900	11.4406	9.66019	8.65128	9.94311	7.97251	9.66255	OG0008724		61
TraesCS2B02G624500	0	0	0	0	0	0	OG0000519
TraesCS5B02G285200	0	0	0	0	0	0	OG0021303	GO:0005576,GO:0005618
TraesCS6D02G003500	0	0	0	0	0	0	OG0000400	GO:0003676
TraesCS2B02G603800	0.968588	0.913591	0.889693	0.476965	0.982644	0.213243	OG0014139	GO:0000166,GO:0003676,GO:0005739	1
TraesCS1B02G125300	0	0	0	0	0.0615047	0	OG0008555	GO:0005764
TraesCS7D02G511000	0	0	0	0	0	0	OG0057919
TraesCS3A02G379300	1.61206	1.47805	1.18486	1.67228	1.54624	1.82496	OG0028667		10342
TraesCS2A02G416500	1.93145	1.61145	1.32101	2.31687	1.69947	2.54113	OG0006511	GO:0003723,GO:0005739	2028
TraesCS5A02G269900	0.0695003	0	0	0	0.448419	0	OG0001130	GO:0005730,GO:0005783,GO:0005794
TraesCSU02G258100	0	0	0	0	0	0	OG0013203	GO:0005739
TraesCS7A02G129900	0.317253	0.0214108	0.281148	0.167298	0.576707	0.357884	OG0014548		2321
TraesCS4A02G109800	0	0	0	0	0	0	OG0000272	GO:0005198
TraesCS3D02G230400	6.98101	8.0257	6.74216	4.98319	5.33847	2.92729	OG0021880	GO:0003676,GO:0005739	1
TraesCS5B02G324011	0	0	0	0	0	0	OG0013387	GO:0005576
TraesCS4B02G272300	1.53726	1.17884	0.766453	0.845143	0.705647	1.7849	OG0009958		46
TraesCS5D02G400800	0.736941	1.01235	1.19411	1.46859	1.61874	1.58765	OG0007184	GO:0005737	18820
TraesCS2D02G543900	0.174611	0.441192	0.11762	0.408488	0.0730343	0.978181	OG0006662	GO:0003700,GO:0005634	93
TraesCS7B02G371300	0	0	0	0	0	0	OG0026850
TraesCS2D02G168100	0	0	0	0.108265	0	1.64559	OG0002823	GO:0005634
TraesCS1B02G128900	0.0851242	0.189221	0.128192	0.0813372	0.0591767	0	OG0022048
TraesCS5B02G384300	0.302163	0.296218	0.248619	0.484142	0.271273	0.594186	OG0059099	GO:0005622,GO:0005634,GO:0005737	17565
TraesCS7B02G396700	0	0	0	0	0	0	OG0000732	GO:0005488
TraesCS4D02G005200	0	0	0	0	0	0	OG0003866
TraesCS5A02G182300	0.17307	0.244102	0.216967	0.191131	0.050025	0.0284306	OG0008042
TraesCS2A02G022900	0	0	0	0	0	0	OG0047386	GO:0005634,GO:0005739,GO:0005783
TraesCS7D02G020300	0.0369001	0.0261894	0	0.0176292	0.0303149	0	OG0013456	GO:0005488
TraesCS7A02G445904	0	0.0099015	0	0.013836	0	0	OG0048712
TraesCS5A02G329500	0	0	0	0	0	0	OG0000068	GO:0005618
TraesCS1D02G400200	0.0151572	0	0	0	0	0	OG0016197	GO:0005634,GO:0005737
TraesCS7A02G220600	0.339125	0.434613	0.242047	0.62739	0.361999	2.14619	OG0010079	GO:0005198,GO:0005739	0
TraesCS1D02G396100	0.0329261	0.034537	0.0360672	0.0239046	0.0166495	0.0417357	OG0056850
TraesCS1D02G188700	0	0	0	0	0	0.157124	OG0003737	GO:0003677,GO:0003700,GO:0005634
TraesCS5B02G377600	1.05355	1.02811	1.42266	1.44343	1.97854	1.84529	OG0053074		17549
TraesCS2D02G427100	0	0	0	0	0	0	OG0001503	GO:0005515
TraesCS2D02G323000	0	0	0	0	0	0	OG0056841
TraesCS7D02G511100	0.143143	0.067436	0.115766	0.146478	0.234835	0.464888	OG0010220		2527
TraesCS5B02G384600	0.597537	0.698343	0.342271	1.06602	0.256993	2.3251	OG0014541	GO:0003700,GO:0005515,GO:0005634,GO:0005737	3
TraesCS6B02G057300	0.0768719	0.101658	0.0625528	0.309326	0.175378	0	OG0057025
TraesCS2B02G270000	1.41923	1.27534	1.699	2.44994	1.6122	2.23954	OG0000612		1828
TraesCS7A02G517500	0	0	0	0	0	0	OG0000000
TraesCS7D02G012900	0.241774	0.196616	0.141206	0.17402	0.188528	0.0970846	OG0021124	GO:0005634
TraesCS6D02G131800	1.1705	0.987211	0.936171	1.13413	0.694782	2.09447	OG0008028	GO:0005488	21190
TraesCS3A02G094800	0	0	0	0	0	0	OG0003088
TraesCS2B02G556800	21.3061	19.4484	14.0489	27.151	10.5687	20.0391	OG0018304		8196
TraesCS4B02G333200	0	0	0	0	0	0	OG0003837
TraesCS2B02G503000	0	0.0223113	0	0	0	0	OG0059129	GO:0005773
TraesCS6B02G099600	3.41432	4.98267	2.78194	5.10735	2.21618	2.74519	OG0003539		1538
TraesCS7B02G192900	0	0	0	0	0	0	OG0014981	GO:0000003,GO:0003676,GO:0005654
TraesCSU02G212900	0	0	0	0	0	0	OG0000519
TraesCS2A02G591200	0.0333029	0.135716	0.255845	2.11353	1.34523	11.1013	OG0000683	GO:0003677,GO:0005634	0
TraesCS5D02G560700	0.942561	0.921997	0.970348	1.24287	0.878813	1.21334	OG0018638	GO:0005634	19129
TraesCS4B02G345100	0.581715	0.502181	2.34845	0.564963	3.72294	0.606098	OG0010151		2
TraesCS6D02G401600	0.0494592	0.011789	0	0.166592	0.0606604	0.0848494	OG0024091	GO:0005634,GO:0005739
TraesCS2B02G545200	0	0	0	0	0	0	OG0054299	GO:0005737
TraesCS4B02G364100	0.0140499	0	0	0.714226	0	0	OG0028420	GO:0005488,GO:0005618,GO:0005773
TraesCS3B02G136000	0.166407	0.321789	0.337109	0.826193	0.0820701	4.5804	OG0011709		55
TraesCS4B02G245400	3.72925	1.70074	2.11094	2.35646	2.0199	2.3438	OG0015453		291
TraesCS1D02G387700	0.0150499	0.00776957	0.00890795	0.0110419	0.0152204	0.0393534	OG0000234	GO:0005737
TraesCS3D02G441300	0.0580361	0.0965916	0.0543619	0.20703	0	1.07585	OG0000366	GO:0005634
TraesCS4B02G249800	1.88315	2.1948	1.01997	1.20126	0.811524	0.194913	OG0017791	GO:0003676,GO:0005654,GO:0005737	15
TraesCS3A02G281500	0.466649	0.22021	0.194898	0.834524	0.253054	1.31132	OG0015559	GO:0003824,GO:0005488,GO:0005737	10099
TraesCS2A02G229000	0.958457	1.11711	0.798663	1.46827	1.09925	1.00869	OG0045835	GO:0000166	6378
TraesCS6B02G066300	6.88742	7.99738	4.49516	3.69	4.95657	1.23285	OG0012844		1
TraesCS6D02G058300	0	0	0	0	0	0	OG0003104
TraesCS6A02G278100	0.0551092	0.0317165	0	0.0802113	0.391206	0	OG0012910
TraesCS2B02G322900	1.57588	1.41367	1.52924	1.7503	1.68417	1.09885	OG0009599	GO:0005634,GO:0005739,GO:0005777	727
TraesCS7A02G480900	0	0	0	0	0	0	OG0001547
TraesCS6B02G465400	0.178523	0.0574933	0.644399	0.0415411	0.673959	0.238618	OG0002154		263
TraesCS7A02G126000	0	0	0	0	0	0	OG0003067
TraesCS7A02G090400	2.12071	3.19733	2.57691	1.02596	2.54274	0.742794	OG0009967		1
TraesCS6A02G274000	0	0.00590644	0	0	0.0151959	0.0747437	OG0003794	GO:0003677,GO:0003700,GO:0005634
TraesCS6B02G396400	0.00431871	0	0	0	0	0	OG0001092	GO:0003676,GO:0005634
TraesCS2D02G334000	0.646435	1.39735	0.621853	0.812525	1.17997	0.356939	OG0009481	GO:0005488	8988
TraesCS6B02G069800	1.72328	1.61178	1.78529	2.7443	1.72236	4.96744	OG0012679	GO:0005730	8
TraesCS4A02G425500	0	0	0	0	0	0	OG0000958	GO:0005773
TraesCS4A02G328200	0.36032	0.440959	0.288562	0.628467	0.26826	1.0389	OG0014677		13574
TraesCS2A02G581400	0.0273701	0.0264721	0.00816065	0.0296638	0.0365814	0.124154	OG0018412
TraesCS5A02G495400	0	0	0	0	0	0.21813	OG0000090	GO:0005215,GO:0005576,GO:0005783
TraesCS7B02G467100	0.0101441	0	0	0	0	0.176566	OG0014251	GO:0005576
TraesCS2A02G352400	3.39082	3.56255	4.36166	5.93591	4.99032	7.70472	OG0006630	GO:0003676,GO:0003700,GO:0005634	2184
TraesCS3B02G264900	0.379284	0.244582	0.21785	0.739545	0.412181	1.83431	OG0002315	GO:0005576,GO:0005618,GO:0005773	0
TraesCS7B02G314800	12.1318	15.1959	9.64492	11.465	11.5438	13.5255	OG0004397		23652
TraesCS3B02G190700	0	0.0211014	0.108033	0	0	0	OG0000549	GO:0000166,GO:0003676,GO:0005576,GO:0005618
TraesCS6D02G245900	1.85713	1.77028	2.7353	3.37354	3.13891	4.99051	OG0008236	GO:0003677,GO:0003682,GO:0005634	21490
TraesCS2A02G096000	2.08404	1.96271	1.67726	2.39234	1.66394	2.68001	OG0014959	GO:0005576,GO:0005634,GO:0005783	6070
TraesCS4A02G492000	0	0	0	0	0	0	OG0003890	GO:0005576
TraesCS3B02G608600	0	0	0	0	0	0	OG0000226	GO:0003676,GO:0003700
TraesCS7D02G480000	3.65892	5.65249	4.09977	7.83278	4.13253	11.2817	OG0054698	GO:0003723,GO:0005198,GO:0005730	5
TraesCS2D02G462400	0	0	0	0	0	0	OG0021096
TraesCS3A02G186100	2.11897	2.19198	2.00003	3.57452	2.04702	5.57132	OG0012081		51
TraesCS4B02G322600	0.613988	0.804526	0.574651	0.88433	0.681641	1.10257	OG0010342		14577
TraesCS3D02G048600	0	0	0	0	0.0988985	0	OG0059141
TraesCS2A02G249900	1.42529	2.40352	1.06554	2.23632	0.791851	2.80155	OG0010656	GO:0005739	6421
TraesCS3D02G118700	0.462348	0.604307	0.541083	0.801053	0.626527	1.25099	OG0003705	GO:0003677,GO:0003682,GO:0005634	11933
TraesCS3B02G601100	168.115	148.178	276.385	241.725	405.222	177.589	OG0002974		6
TraesCS7D02G359600	0	0	0	0	0	0	OG0001725
TraesCS2A02G184200	0.791194	0.630046	0.611559	0.532725	0.648163	0.694515	OG0001983		6270
TraesCS2B02G035200	0.242781	0.161579	0.318505	0.409282	0.322585	0.874313	OG0000396		7141
TraesCS3A02G144500	0	0	0	0	0	0	OG0045225	GO:0005618,GO:0005635,GO:0005654,GO:0005730,GO:0005794
TraesCS6D02G321600	0	0	0	0	0	0	OG0020480	GO:0005783
TraesCS3D02G325800	11.4143	20.3278	9.48177	3.5006	5.99568	1.42105	OG0007846	GO:0005198,GO:0005488	1
TraesCS5A02G356500	0.445998	0.398583	0.44969	0.674002	0.466674	0.970597	OG0008790	GO:0003723,GO:0005622,GO:0005730,GO:0005737	16286
TraesCS7B02G006400	4.30455	5.01292	4.60365	4.90903	5.29486	4.49631	OG0009763	GO:0003700	22955
TraesCS7D02G327000	0.89092	0.939651	0.700159	1.237	0.828079	1.47697	OG0012653	GO:0003723	24561
TraesCS4A02G095200	13.6304	16.1028	9.16718	5.83156	8.59795	0.646333	OG0001981	GO:0003677,GO:0003700,GO:0005739	1
TraesCS6B02G083800	0.227539	0.15007	0.0992802	0.243495	0.117962	0.1471	OG0008562
TraesCS3A02G471100	0	0	0	0	0.089987	0	OG0013210
TraesCS3A02G293900	3.51377	3.31521	2.94957	5.03926	2.5735	2.82183	OG0011978	GO:0000166,GO:0003723,GO:0005634	2496
TraesCS5A02G191300	4.35615	4.88218	2.53837	3.6263	2.5405	4.74692	OG0006367		2899
TraesCS3D02G471400	0.213918	0.0834284	0.0770048	0.144168	0.176477	0.151046	OG0011402
TraesCS5A02G315400	0	0	0	0	0	0	OG0020966
TraesCS3B02G587600	0	0	0	0	0	0.0333491	OG0028537	GO:0005634
TraesCS1A02G370600	0	0	0	0	0	0	OG0000914	GO:0003677,GO:0003700,GO:0005634
TraesCS3D02G014400	0.0467398	0.0464044	0.0680607	0.0717427	0.0505124	0.12662	OG0054327	GO:0003676
TraesCS2D02G131700	0.830093	0.784482	0.670938	1.04275	0.339709	0.864071	OG0009913	GO:0005634	8526
TraesCS6B02G448100	0	0	0	0	0	0	OG0000136
TraesCS5B02G549800	2.22311	2.19233	1.74119	4.89955	2.1176	8.36973	OG0011021		3
TraesCS4B02G321000	0.767256	0.595068	0.752011	1.00019	1.1215	1.7503	OG0021583		13
TraesCS1B02G460500	0.146374	0.118162	0.104077	0.112994	0.120631	0.155452	OG0004658	GO:0003676
TraesCS1D02G377100	0	0	0	0	0	0	OG0017610
TraesCS3B02G115800	0	0	0	0	0	0.0542843	OG0012523
TraesCS5D02G452100	0	0.0111193	0	0.0173779	0	0	OG0001090	GO:0005488
TraesCS6B02G007100	0	0	0	0	0	0	OG0023331
TraesCS7D02G241000	0.115157	0.17068	0.1141	0.191585	0.133084	0.463707	OG0019634	GO:0003723,GO:0004518,GO:0005739	24334
TraesCSU02G173300	0	0	0	0	0	0	OG0003081	GO:0005739
TraesCS3B02G053100	0	0	0	0	0	0	OG0013403	GO:0005622
TraesCS1B02G288900	0.918939	0.851444	0.744591	1.43134	0.6771	2.16713	OG0044422	GO:0003824	4672
TraesCS5D02G226200	0.237168	0.128522	0.132592	0.536166	0.204938	0.453854	OG0009123	GO:0005739,GO:0005773	18460
TraesCS7A02G458500	0	0	0	0	0	0.0376338	OG0000158	GO:0003676
TraesCS6B02G409800	86.7983	78.7953	104.93	51.4209	86.9651	11.7401	OG0014549		1
TraesCS6D02G105300	0.729578	0.66082	0.664134	0.938247	0.694425	1.15429	OG0002528	GO:0005488	21131
TraesCS5B02G172400	0	0	0	0	0	0	OG0024289	GO:0005488
TraesCS7D02G386100	18.3355	14.8089	17.6182	21.8481	17.6098	11.5623	OG0003584	GO:0005634	465
TraesCS4A02G039900	0.0458238	0.0302995	0	0	0.037646	0.0459005	OG0009790	GO:0000166
TraesCS6B02G249400	0.184033	0.203061	0.136529	0.895497	0.26957	4.50899	OG0001663	GO:0005739,GO:0005783,GO:0005794	0
TraesCS2B02G483500	0.032013	0	0	0.0219616	0.0377646	0.0801052	OG0004150	GO:0005768
TraesCS6A02G226300	0	0	0	0	0	0	OG0022903	GO:0005634,GO:0005737
TraesCS2B02G593800	0	0	0	0	0	0	OG0003841	GO:0005737
TraesCS1A02G060900	0	0	0	0	0	0	OG0008426
TraesCS1B02G221300	0	0.0223493	0	0	0	0	OG0012526	GO:0005783
TraesCS3B02G560500	0	0	0	0	0	0	OG0023926
TraesCS4B02G366900	0.0454716	0.0980553	0.383616	0.163617	0.369894	0	OG0020908		1867
TraesCS6B02G210700	6.48262	6.56281	9.54168	8.75692	9.89316	5.54715	OG0000896	GO:0005634,GO:0005737	623
TraesCS2B02G429200	1.40186	0.951995	3.12788	1.88255	4.17896	1.0614	OG0006581	GO:0000166,GO:0005768	2
TraesCS2D02G567700	0	0	0	0	0	0	OG0008392	GO:0003677,GO:0005634
TraesCS3B02G029100	0	0	0	0	0	0	OG0003916	GO:0005783,GO:0005794
TraesCS5B02G346000	0	0	0	0	0	0	OG0003159	GO:0005515,GO:0005739
TraesCS2A02G091700	1.66312	1.32558	1.26574	1.87644	1.16787	2.19967	OG0013255		944
TraesCSU02G033900	1.79096	2.39251	1.69028	3.75294	1.97418	4.99676	OG0008143	GO:0003723,GO:0005634,GO:0005730	5
TraesCS6D02G133800	3.57525	3.62206	2.91128	5.83042	3.74088	7.91373	OG0047973		264
TraesCS4B02G023300	0	0	0	0	0	0	OG0005795	GO:0003676,GO:0005634
TraesCS3A02G493800	0.0544498	0.012726	0	0.0476004	0.0460274	0.01996	OG0013322
TraesCS1B02G256300	1.46436	1.25256	1.46289	1.69662	1.56386	1.66376	OG0016290		4600
TraesCS1A02G240800	0	0	0	0	0	0	OG0007944	GO:0003677,GO:0003824,GO:0005576
TraesCS2B02G162200	16.8605	15.7794	16.6317	23.076	17.0439	30.6001	OG0002674		4
TraesCS3A02G293100	0.06244	0.0999666	0.209709	0.22118	0.160735	0.360348	OG0011944	GO:0003723,GO:0004518,GO:0005739	2159
TraesCS1B02G091100	0.270784	0.221549	0.235723	0.393797	0.277397	0.229391	OG0013460	GO:0005488	4169
TraesCS1D02G368000	0	0.0339577	0	0	0	0	OG0000036	GO:0003677,GO:0005730,GO:0005773
TraesCS4B02G377700	0	0	0	0	0	0	OG0052237	GO:0005618
TraesCS3B02G280300	0	0	0	0	0	0	OG0011807
TraesCS1D02G003400	0	0	0	0	0	0	OG0046784
TraesCSU02G253600	0	0	0	0	0	0	OG0000175	GO:0004518,GO:0005576
TraesCS1A02G358300	0	0	0	0	0	0.132149	OG0024521
TraesCS5D02G098100	0.0525929	0.0777137	0.123013	0.189223	0.0598959	0.403083	OG0003516	GO:0005488	2621
TraesCS1B02G298000	2.68079	2.35261	2.338	3.03293	2.37589	3.24606	OG0012008	GO:0005488,GO:0005654,GO:0005737	4696
TraesCS7B02G364800	2.61301	2.07743	7.62474	3.45819	8.36901	9.01872	OG0010985		7
TraesCS7A02G195500	3.89594	3.73094	2.64062	4.09147	2.82623	5.27924	OG0009795	GO:0005634,GO:0005739	3095
TraesCS6D02G050700	0	0	0	0	0	0	OG0000067
TraesCS2A02G413200	0	0	0	0	0	0	OG0014144	GO:0003676,GO:0005634
TraesCS1A02G402600	0	0	0	0	0	0	OG0006637
TraesCS4A02G154200	0	0	0	0	0	0	OG0000304	GO:0005488
TraesCS1D02G336800	0.0620929	0.0292284	0.149098	0.0466458	0	0	OG0015308	GO:0003824,GO:0005488,GO:0005634
TraesCS7A02G259500	4.51981	3.94168	2.41282	7.71868	2.68245	11.4671	OG0056040	GO:0005198,GO:0005730,GO:0005773	11
TraesCSU02G048100	0.331223	0.2319	0.0905072	0.188767	0.134343	0.193572	OG0025454
TraesCS1D02G325000	0	0.0194449	0.0991912	0.0905145	0	0	OG0015736
TraesCS7D02G311500	1.20079	1.2807	0.692916	2.40056	1.09133	3.89998	OG0005865	GO:0005634	765
TraesCS7B02G031500	0.311059	0.579115	0.211307	0.517106	0.353264	2.48935	OG0004346		0
TraesCS7A02G349300	0	0	0	0	0	0	OG0024416	GO:0000166,GO:0003676,GO:0005622
TraesCS1B02G359400	0	0	0	0.00755796	0	0	OG0000043
TraesCS5B02G374200	8.07291	8.2302	8.80366	10.954	9.0621	11.3604	OG0020421	GO:0005634	17539
TraesCS2A02G519000	0	0	0	0	0	0	OG0004756	GO:0005488
TraesCS2A02G508500	0	0	0	0	0	0	OG0013302	GO:0005576
TraesCS6A02G056900	0	0	0	0	0	0	OG0013296
TraesCS3B02G091400	0.104005	0.0630958	23.9588	0.14145	34.4087	0.0258119	OG0005429		7
TraesCS3D02G294300	0.81267	0.617957	0.530877	2.62553	0.812925	6.563	OG0015764	GO:0003676,GO:0005635,GO:0005654	0
TraesCS3B02G196000	0.634894	0.595686	0.486983	0.712138	0.257579	0.71267	OG0007690	GO:0005739	10905
TraesCS2D02G157900	0	0	0	0.0258094	0	0	OG0000228
TraesCS7B02G079100	0.0440351	0.0518305	0.0687274	0.20593	0.0504727	0.0753006	OG0016396
TraesCS2A02G402200	1.41487	0.997531	2.23419	1.94557	2.88305	2.39375	OG0006588	GO:0003682,GO:0003700,GO:0005634	909
TraesCS5B02G496200	0.128548	0.112166	0.125014	0.15178	0.202325	0.140782	OG0045934
TraesCS3D02G221700	0.703869	0.491911	0.43906	0.779837	0.341425	0.548247	OG0000252	GO:0005515,GO:0005634,GO:0005739,GO:0005773	12214
TraesCS3A02G263800	0.491483	0.542443	0.139827	0.412931	0.209296	0.413015	OG0015614	GO:0005739	10046
TraesCS2B02G232100	0.67705	0.682346	0.870713	1.08699	1.14682	1.0645	OG0018472	GO:0000166,GO:0003723	7516
TraesCS4D02G094200	0.0228587	0.0220166	0	0.168066	0.213769	1.37609	OG0057061	GO:0005794	9
TraesCS3B02G541300	66.3529	51.3863	72.4205	59.1105	62.47	17.7396	OG0016190	GO:0005739	1
TraesCS7D02G216500	1.46868	1.10516	1.46095	1.19869	1.84068	0.588924	OG0012871	GO:0003677,GO:0003677,GO:0005634	2
TraesCS6D02G120000	0.146414	0.448355	0	0.210827	1.69407	0	OG0005746
TraesCS7A02G330800	0.0487765	0.101737	0.00970611	0.0711739	0.110697	0.0393617	OG0020472
TraesCS1D02G236300	0.227676	0.121681	0.0748055	0.111569	0.155984	0.591904	OG0002283	GO:0000166,GO:0003723,GO:0005634,GO:0005737	338
TraesCS2D02G484300	0	0	0	0	0	0	OG0027330
TraesCS1A02G401600	0	0	0	0	0	0	OG0013299
TraesCS7B02G430700	0	0	0	0	0	0	OG0055800
TraesCS3B02G521700	0	0	0	0	0	0	OG0018960
TraesCS2A02G131200	0	0	0	0	0	0	OG0001529	GO:0003677
TraesCS7A02G001200	0	0	0	0	0.00755691	0	OG0028311
TraesCS3A02G287300	1.12632	0.863933	0.527175	0.950676	0.619737	1.25981	OG0024128		10114
TraesCS7B02G073700	0	0	0	0.0408563	0	0.352874	OG0015425	GO:0005576,GO:0005768,GO:0005783,GO:0005794
TraesCS3B02G102900	2.96207	5.38256	4.67851	1.71032	5.27744	0.620503	OG0006472	GO:0003723,GO:0005198	196
TraesCS1D02G058100	0.480395	0.573157	0.506988	0.531686	0.472788	0.151822	OG0001664		5096
TraesCS2A02G493100	0	0	0	0	0	0	OG0001050	GO:0000003
TraesCS2D02G095200	0.0540188	0.175528	0.0536928	0.273002	0.272549	0.291889	OG0005277		8452
TraesCS6A02G421500	0	0	0	0	0	0	OG0047435	GO:0005576,GO:0005618
TraesCS5B02G483000	0	0.0251295	0	0	0	0	OG0024483
TraesCS1A02G429800	0	0	0	0	0	0.0670501	OG0045311	GO:0005739,GO:0005783
TraesCS3B02G274100	1.74542	1.73832	0.914055	3.42575	1.55413	6.71183	OG0001050	GO:0005794	11114
TraesCS3A02G015200	0	0	0	0	0	0	OG0013445	GO:0005739
TraesCS3A02G241300	1.72925	1.58689	1.23099	2.0439	1.11649	1.80275	OG0004482		9995
TraesCS7A02G123600	0.0744365	0.254522	0.177447	0.283741	0.168188	0.395065	OG0003080	GO:0005634
TraesCS7D02G551600	11.8355	12.2632	15.5414	16.448	11.4055	7.52446	OG0048550	GO:0005634,GO:0005737	27
TraesCS2A02G208500	1.34676	1.06519	1.36748	2.03768	1.53187	1.49542	OG0018727		6324
TraesCS2D02G498700	0	0	0	0	0	0	OG0001266	GO:0005618
TraesCS7D02G472800	0	0	0	0	0	0	OG0003074
TraesCS5D02G133900	0	0	0	0	0	0	OG0013564	GO:0003700,GO:0005634
TraesCS7B02G350500	0.173762	0.296459	0.222683	0.236469	0.0853178	0.535871	OG0010571		23712
TraesCS1A02G050100	1.93565	1.2671	1.9781	1.44931	2.9441	0.97154	OG0019523	GO:0005634,GO:0005739	2
TraesCS6B02G451600	3.4073	3.7468	3.35079	6.14145	3.27819	7.02545	OG0001695		20901
TraesCSU02G069700	0	0	0	0	0	0	OG0056687
TraesCS1D02G085800	0.138827	0.31844	0.0484627	0.379093	0.325418	0.140256	OG0003882		5144
TraesCS1B02G304600	0.0601239	0.027568	0	0	0.0684727	0.797249	OG0016528	GO:0000166,GO:0005102,GO:0005634
TraesCS3A02G038300	2.42768	1.94833	1.3448	4.76384	1.86353	5.22645	OG0017437	GO:0005773	9541
TraesCS1D02G134200	0.28318	0.200067	0.253236	0.287275	0.27077	0.360924	OG0012645
TraesCS6A02G102900	0	0	0	0	0	0	OG0017673	GO:0003723
TraesCS1A02G119000	0	0	0	0.720286	0	1.96686	OG0015835	GO:0003676,GO:0005739
TraesCS5A02G190200	0	0	0	0	0	0.0559366	OG0050525
TraesCS7A02G065900	0	0	0	0	0	0	OG0056631
TraesCS4D02G347600	0.389237	0.504409	0.0997525	0.451304	0.132073	0.653697	OG0047167	GO:0005622,GO:0005634	2220
TraesCS4A02G410600	0	0	0	0	0	0	OG0004670
TraesCS3B02G572500	0	0	0	0	0	0	OG0004790	GO:0005576,GO:0005618
TraesCS6B02G000800	0	0	0	0	0	0	OG0051421	GO:0005634
TraesCS7A02G091400	0.567036	0.623923	0.621317	0.59183	0.315641	0.929644	OG0013402		21978
TraesCS7A02G266500	23.0645	23.3695	11.7291	6.57877	10.4481	1.36156	OG0012673		1
TraesCS4A02G264200	0	0.00428937	0	0.00548294	0	0	OG0017568
TraesCS6B02G154000	0.122307	0.189718	0.211255	0.385342	0.203297	0.649105	OG0019757	GO:0003676,GO:0005622	191
TraesCS3B02G565100	0	0	0	0	0	0	OG0002411
TraesCS7B02G464200	0.0389757	0	0.0246522	0	0.0210608	0	OG0000494	GO:0003676
TraesCS6B02G126900	0.214145	0.343977	0.0872653	0.3046	0.193525	0.430668	OG0001714	GO:0005634,GO:0005773	20205
TraesCS5A02G397900	1.2458	1.62067	0.7866	0.75845	0.929031	1.27668	OG0000543		16379
TraesCS2B02G079200	2064.69	1863.12	313.693	284.819	204.982	14.9835	OG0000123	GO:0005618	1
TraesCS4B02G055300	0	0	0	0	0	0.149035	OG0000332	GO:0005488,GO:0005739,GO:0005783,GO:0005794
TraesCS6D02G302300	0.0787596	0.0872053	0.09348	0.396847	0.806636	6.65913	OG0000359	GO:0005737	0
TraesCS5B02G345600	0	0	0	0	0	0	OG0000079	GO:0005515,GO:0005739
TraesCSU02G017800	0	0	0	0	0	0	OG0022956	GO:0004518,GO:0005576
TraesCS3D02G145300	0	0	0	0	0	0	OG0002933	GO:0005488,GO:0005576,GO:0005764
TraesCS3B02G432300	0	0	0	0	0	0	OG0019420
TraesCS4D02G029300	0.947743	1.11803	0.789598	0.896982	0.762753	1.19528	OG0013673	GO:0005488,GO:0005737	14770
TraesCS1D02G088000	5.09687	4.04688	7.30591	6.75922	6.7714	7.82026	OG0000252	GO:0005634,GO:0005739,GO:0005773	5148
TraesCS5D02G388500	1.3822	1.22566	0.86375	1.60049	0.782935	2.34891	OG0005323	GO:0005634	185
TraesCS4D02G303700	0	0.0128418	0	0	0	0.0402831	OG0004335
TraesCS7B02G365500	15.622	21.0975	9.65345	10.2286	4.78979	1.43125	OG0000550		1
TraesCS7D02G098000	0	0	0	0	0	0	OG0028055
TraesCS2D02G405300	0.376008	0.364734	0.176716	0.596803	0.292435	1.03616	OG0014161	GO:0005737	9165
TraesCS2B02G385400	18.7391	25.9681	20.8148	25.5624	22.2779	6.68374	OG0009325		730
TraesCS1D02G218500	1.30426	1.19283	1.854	1.59394	1.28632	2.45656	OG0005884	GO:0003677,GO:0005737	5486
TraesCS4A02G142100	0.0656604	0	0.016316	0	0	0	OG0005537	GO:0005739
TraesCS2D02G293200	0.0567158	0.101717	0.146122	0.0837994	0.0410325	0.281444	OG0006680	GO:0005618,GO:0005773
TraesCS6A02G136500	0.0228243	0	0.0577972	0.195519	0.0583001	0.752442	OG0022120	GO:0005576,GO:0005634,GO:0005739,GO:0005783
TraesCS1D02G437200	1.84992	2.49792	0.698304	3.81628	1.2744	4.58564	OG0003721	GO:0003677	1176
TraesCS2B02G165800	1.14457	1.06083	1.22734	1.62342	1.2656	1.23692	OG0002658	GO:0005634	7352
TraesCS7A02G362700	0.647013	0.379639	0.363523	0.704152	0.26769	0.640627	OG0005446	GO:0005739	22571
TraesCS2A02G552900	0.0966943	0.132893	0.0948097	0.334161	0.133241	0.167765	OG0000568	GO:0003676
TraesCS5B02G216300	0.271683	0.276879	0.270043	2.01298	0	1.22983	OG0004826	GO:0003676,GO:0005622
TraesCS2B02G577200	0.173181	0.0489119	0.126879	0.371589	0.173714	0.70694	OG0000305		101
TraesCS6D02G176000	0	0	0	0	0	0	OG0051129	GO:0003824,GO:0005739
TraesCS6B02G177100	0.045723	0.0484178	0.0540125	0.219879	0.0346328	0.872145	OG0028580		0
TraesCS2B02G594700	0	0	0	0	0	0.0188536	OG0044304	GO:0005618,GO:0005773
TraesCS4B02G089100	0.0656863	0.0674934	0.053311	0.123936	0.184737	0.282874	OG0046104		518
TraesCS5D02G359300	0	0	0	0	0	0	OG0003085
TraesCS5A02G519200	6.97357	4.32515	7.54808	9.21933	4.56127	8.59845	OG0020661	GO:0003723,GO:0005794	16620
TraesCS4D02G108800	0	0	0	0	0	0	OG0000451	GO:0005768,GO:0005794
TraesCS6D02G144700	11.8658	8.56496	10.2005	7.04904	12.9691	1.90837	OG0012952	GO:0005777	1
TraesCS2B02G152000	0.0287554	0	0	0	0	0	OG0021756	GO:0005773
TraesCS2B02G522600	0.368012	0.183847	0	0	0	0.179542	OG0000401
TraesCSU02G143500	0	0	0	0	0	0	OG0017603
TraesCS4A02G124700	27.1313	31.7655	23.7867	39.654	13.8135	34.3231	OG0009907	GO:0005198	1604
TraesCS5A02G300900	0	0	0	0	0	0	OG0000421
TraesCS1B02G416800	0.0564921	0.0577401	0.0369062	0.147521	0.129381	0.255598	OG0003199
TraesCS5A02G049300	0.31577	0.192399	0.747346	0.498275	1.16128	0.815086	OG0005031		53
TraesCS3A02G304500	0	0	0	0	0	0	OG0016101
TraesCS2A02G531400	0.915453	2.10118	0.262314	2.43517	0.111055	0.841539	OG0055825	GO:0003824	225
TraesCS3A02G285700	1.12302	0.898529	0.681661	0.619635	0.600997	1.153	OG0003710	GO:0005739	365
TraesCS7A02G030900	3.8869	3.84235	3.54153	6.24993	3.79932	9.35744	OG0007395	GO:0003676	0
TraesCS3B02G030400	0.127584	0.0240155	0	0.0359309	0.0596489	0.0975142	OG0008561
TraesCS7A02G134000	0.0441248	0.106542	0.120071	0.152943	0.0476863	0.401907	OG0012120	GO:0005737	22051
TraesCS5B02G217400	0	0.00540598	0.00479245	0.020214	0.0103041	0.00693495	OG0004937	GO:0005488,GO:0005773
TraesCS5A02G235100	0	0	0	0	0	0	OG0014667	GO:0005634,GO:0005794
TraesCS2A02G090900	0	0	0	0	0	0	OG0001028
TraesCS1B02G141600	0	0	0	0	0	0	OG0000024
TraesCS2B02G591900	0	0	0	0	0	0	OG0049340
TraesCS3D02G008400	0	0	0	0.0179255	0	0	OG0053445
TraesCS7A02G210300	0.0778784	0.014505	0	0.0882539	0.0733449	0	OG0003433
TraesCS4A02G269900	0.544702	0.870936	0.594759	0.799394	0.905529	0.977868	OG0010707	GO:0005634	13454
TraesCS2B02G541600	0	0	0	0	0	0	OG0054048
TraesCS1B02G215900	0	0	0	0	0	0	OG0000561	GO:0003676
TraesCS1D02G184100	2.60476	2.17266	2.47768	2.86103	2.54249	3.62979	OG0017147		5383
TraesCS5B02G149400	2.20554	2.58455	2.26293	3.60255	0.759189	5.6746	OG0009218		2953
TraesCS5B02G567300	0.0485341	0.0454011	0	0.0528292	0.0278169	0.06742	OG0000644
TraesCS7D02G196700	0.659563	0.984867	1.34408	1.18939	2.3004	1.43436	OG0007356		50
TraesCS2B02G506300	0	0	0	0	0	0	OG0023276
TraesCS4A02G038000	0	0.0171445	0	0.0351367	0.0191587	0	OG0014583
TraesCS5B02G039500	1.23453	0.955821	0.800628	1.17367	0.876298	0.988006	OG0001644		16757
TraesCS2D02G135300	0	0	0	0	0	0	OG0014659
TraesCS7A02G275900	0.0433487	0.0198763	0	0.0297381	0	0.0623495	OG0023643	GO:0005622
TraesCS4B02G110300	0	0	0	0	0	0	OG0054674	GO:0003676,GO:0003824
TraesCS6A02G062900	0	0	0	0	0	0	OG0020913	GO:0005488,GO:0005634
TraesCS2A02G473200	1.41675	1.00523	1.25329	1.13583	1.27465	0.697637	OG0014421	GO:0003677	595
TraesCS1D02G124500	9.4564	9.03599	8.81529	11.9251	6.68316	11.7755	OG0001235	GO:0005739	5232
TraesCS6D02G363300	0	0	0	0	0	0	OG0029392
TraesCS4B02G059800	9.68159	9.37687	9.86189	8.12903	11.5215	5.79544	OG0010818	GO:0005488	1
TraesCS3A02G083600	0.016232	0	0	0.0624281	0	0	OG0026820	GO:0005783
TraesCS5D02G108600	1.35631	1.5257	1.34876	2.04013	1.24092	3.10137	OG0008978	GO:0003677	18142
TraesCS5D02G396500	0	0	0	0.0262733	0	0	OG0021565
TraesCS3A02G504600	0	0	0	0	0	0	OG0028899	GO:0005618,GO:0005730,GO:0005773
TraesCS3D02G332100	4.6459	6.25355	4.79046	2.89166	5.16593	1.32824	OG0011430	GO:0005739	1
TraesCS6B02G098100	0.03135	0.05424	0.0426324	0.015368	0.0732707	0	OG0000940
TraesCS5B02G057400	0.115136	0.17411	0.10214	0.334743	0.100977	0.576566	OG0010093	GO:0003677,GO:0005634,GO:0005737	16797
TraesCS6A02G323800	1.12061	0.821052	0.980711	1.46158	1.10327	5.43438	OG0016509	GO:0005737	0
TraesCS2D02G500800	0	0.11603	0.0528075	0.109533	0.19596	0.879924	OG0009686	GO:0005488
TraesCS5A02G429300	12.3839	14.3709	10.2101	7.42175	10.6336	5.07845	OG0055751		1
TraesCS1D02G271000	0.0665356	0.0062621	0.0455186	0.224034	0.0564523	1.20602	OG0020591	GO:0005634	0
TraesCS2D02G368400	1.76163	1.93195	1.63171	2.31651	1.42282	2.898	OG0006635	GO:0005794	9074
TraesCSU02G197800	0	0	0	0	0	0	OG0007643
TraesCS4A02G246400	0.717483	0.672457	0.623229	1.13791	0.819952	2.11113	OG0010498	GO:0005794	371
TraesCS7D02G162000	0	0	0	0	0	0	OG0020696	GO:0005634
TraesCS6D02G256800	0	0	0	0	0	0	OG0016442
TraesCS3B02G190600	0.94289	0.659153	0.595651	1.69819	0.82394	4.84522	OG0019087		0
TraesCS2B02G238600	0.166931	0.123507	0.183331	0.343813	0.169044	0.253746	OG0010477	GO:0003677,GO:0005634,GO:0005768	7533
TraesCS1D02G096300	0.120965	0.125699	0.389282	0.276236	0.0604298	0.454839	OG0003564	GO:0005576,GO:0005634,GO:0005737	1323
TraesCS6B02G368900	0	0.0228825	0.0463285	0	0.046527	0	OG0004852	GO:0005622
TraesCS7A02G528400	0	0	0	0	0	0	OG0051565
TraesCS1B02G233600	0.338516	0.487893	1.41823	0.314263	3.37899	0.635491	OG0016650	GO:0003677,GO:0005634	2
TraesCS6A02G343800	0	0	0	0	0	0.145412	OG0004695	GO:0005576
TraesCS7D02G017900	0.110398	0.0207806	0.14305	0.0656409	0.105077	0	OG0000514
TraesCS1B02G409500	0	0	0	0	0	0	OG0009350	GO:0003676,GO:0005634
TraesCS3D02G287500	0	0	0	0	0.0217939	0.109263	OG0054217
TraesCS5D02G220700	0	0	0	0	0	0	OG0045817
TraesCS4A02G238500	0.224932	0.51569	0.118897	1.40956	0.0553788	5.69479	OG0008618		0
TraesCS4B02G321900	5.04126	6.97408	8.62759	6.58117	15.0812	0.992067	OG0018529		1
TraesCS4D02G055700	0.298194	0.485184	2.39226	2.07286	5.11293	7.15425	OG0000332	GO:0005737	14
TraesCS1A02G145100	0.0276758	0.00964718	0	0.00692691	0.0107806	0	OG0020245	GO:0005739
TraesCS3B02G303100	1.7021	1.04156	0.952256	1.58239	0.656687	0.976418	OG0015591	GO:0005739,GO:0005773,GO:0005794	2306
TraesCS3A02G467600	3.98465	3.55626	4.24238	6.91743	5.10683	10.2233	OG0019431	GO:0005198	4
TraesCS7A02G190600	0	0	0	0.0110504	0.0373468	0.1809	OG0003577	GO:0005773
TraesCS7D02G036900	0.0858857	0.031698	0.0366117	0.0159099	0.0125101	0.195327	OG0048344	GO:0005783
TraesCS5B02G021800	0.161763	0.0417552	0.52937	0.226111	2.20941	0.765681	OG0000253	GO:0005488	36
TraesCS6A02G130200	0.270405	0.472987	0.228279	0.836185	0.213428	1.23688	OG0001858		691
TraesCS2B02G149200	0	0	0	0	0	0	OG0000182	GO:0005515,GO:0005739
TraesCS7B02G099600	0	0	0	0.0274002	0	0	OG0049525	GO:0005576
TraesCS5B02G250100	0	0	0	0	0	0	OG0000347
TraesCS5D02G388200	0.241116	0.022092	0	0	0	0	OG0015474	GO:0005634
TraesCS1D02G268000	0	0	0	0	0	0	OG0001648	GO:0003676
TraesCS6B02G325500	0.452082	0.639404	0.633151	0.660506	0.639535	0.682294	OG0003415		20661
TraesCS4B02G184900	0	0	0	0	0	0.0754114	OG0045052	GO:0003723,GO:0005730
TraesCS7D02G005300	0	0	0	0	0	0	OG0003899	GO:0005634
TraesCS7A02G441400	4.12162	4.66792	4.09283	6.90311	4.61746	16.5864	OG0007238	GO:0005794	0
TraesCS2A02G276900	0.140711	0.265677	0.164021	0.118128	0.0971079	0.506055	OG0009545	GO:0003723,GO:0004518,GO:0005739	6491
TraesCS3A02G401500	0	0	0	0	0	0	OG0016059	GO:0005576,GO:0005618
TraesCS2D02G089700	0	0	0	0	0	0	OG0048695	GO:0005739
TraesCS6B02G029300	0	0	0	0	0	0	OG0006027	GO:0005488
TraesCS4A02G000400	0.258058	0.319955	0.148732	0.68991	0.292605	1.01161	OG0017926		12831
TraesCS5B02G366700	2.32136	2.36822	1.68546	3.24703	1.57484	5.28706	OG0003241	GO:0003824,GO:0005739	178
TraesCS2D02G387700	2.78505	2.28325	4.18435	3.40026	3.63673	3.14179	OG0000438		9123
TraesCS3B02G101300	0.0789295	0.0284516	0.111271	0.0194825	0.0514648	0	OG0000913	GO:0005737
TraesCS5D02G038700	1.45417	1.94278	1.50485	3.73617	2.00295	7.45319	OG0007839		3
TraesCS6D02G041100	0	0	0	0	0	0	OG0011406	GO:0000166,GO:0003677,GO:0005730
TraesCS5A02G369800	0.55406	0.436657	1.2962	0.271675	0.344627	0.117648	OG0002782		991
TraesCS1A02G083400	1.79182	1.87598	1.47023	3.35178	1.88665	5.96766	OG0007825	GO:0000166,GO:0003723,GO:0005730,GO:0005737	0
TraesCS2B02G581600	0.571089	0.529167	0.397726	0.882536	0.524615	1.48137	OG0021481		2032
TraesCS3A02G434900	0.108097	0.0536586	0.0343138	0.084019	0.00748111	0.190605	OG0002480	GO:0003676,GO:0005634
TraesCS7B02G461500	0	0	0	0	0	0	OG0000476
TraesCS3D02G118000	0	0	0	0	0	0	OG0000200	GO:0003676,GO:0005634,GO:0005737
TraesCS3D02G368400	0	0	0	0	0	0	OG0011186	GO:0000166,GO:0003677,GO:0005634,GO:0005737
TraesCS2B02G093600	0	0	0	0	0	0	OG0001552	GO:0003677,GO:0005794
TraesCS1B02G251800	0.689862	1.19943	0.0932641	3.13466	0.2249	5.59819	OG0002839		4588
TraesCS2D02G097400	0.0416055	0.0319589	0.0290902	0.0616616	0.0462213	0.0933252	OG0015044
TraesCS7B02G185400	0.62746	0.498387	0.521238	0.740177	0.358174	0.783971	OG0016846	GO:0003700,GO:0005634	23336
TraesCS3A02G174000	0	0	0	0	0	0	OG0024245
TraesCS4A02G299000	0.0109132	0.0232017	0	0.0162107	0	0.0439948	OG0046861
TraesCS7B02G286800	0.746876	0.808572	0.914368	0.876431	0.768755	0.965315	OG0009817		23584
TraesCS7D02G492200	23.5944	25.6164	24.4401	12.7654	25.3973	4.70209	OG0012009		1
TraesCS1B02G205900	2.17924	2.03701	2.47842	2.78414	2.7304	2.49295	OG0022284		1258
TraesCS7A02G132200	0.335737	0.203851	0.275405	0.366804	0.372938	0.256121	OG0029057		22046
TraesCS6A02G022200	0	0	0	0	0	0	OG0023530
TraesCS1B02G025200	0	0	0	0	0	0	OG0002368
TraesCS3A02G403500	0.00903355	0	0.0527949	0.134415	0.225676	0.104833	OG0013430	GO:0003677,GO:0005515
TraesCS3A02G080800	0.176852	0	0	0.176501	0	0.35732	OG0009101
TraesCS3A02G473800	0	0	0	0	0	0	OG0000721	GO:0003677,GO:0003700,GO:0005634
TraesCS3D02G216100	0.0606986	0	0	0	0.143208	0	OG0019175	GO:0005737
TraesCS4A02G100000	0.171023	0.1571	0.0967043	0.0970547	0.177902	0.154678	OG0005036	GO:0000166,GO:0003676,GO:0005634
TraesCS3A02G240200	0.0386626	0	0	0	0	0.198636	OG0015887	GO:0005488
TraesCS7A02G255000	0.700661	0.972628	0.653299	1.4626	0.979388	2.31094	OG0016501	GO:0005488	277
TraesCSU02G117800	20.2522	17.257	15.7123	8.21202	18.1731	4.03859	OG0019493		1
TraesCSU02G067400	1.12151	1.0809	0.924518	1.14268	0.70194	1.76989	OG0004996	GO:0005488	25096
TraesCS5D02G542600	1.77771	2.15769	2.29072	1.31458	4.91577	0.165826	OG0000043		733
TraesCS6B02G232600	0	0	0	0	0	0	OG0018742	GO:0003723,GO:0005198,GO:0005739
TraesCS7D02G528200	0	0	0	0	0	0	OG0000494	GO:0003676
TraesCS4A02G333100	0	0	0	0	0	0	OG0048475
TraesCS2D02G010700	14.299	20.2921	9.53658	21.7669	4.71385	10.9229	OG0009368	GO:0005739	8331
TraesCS2B02G145600	0	0.0312415	0.153858	0.142973	0.0388164	0.926759	OG0023293		278
TraesCS2D02G564600	0	0.0884061	0	0	0	0	OG0050547	GO:0005739
TraesCS4D02G167900	1.85015	3.08495	2.08774	1.57685	2.2491	1.67347	OG0009890	GO:0005739	18
TraesCS5B02G013800	0.0312428	0.446871	0.462606	0.241345	0.159607	0.489831	OG0004299	GO:0005634	16716
TraesCS3B02G423300	16.6254	16.8892	12.7844	9.87433	8.3187	4.91771	OG0011517		1
TraesCS5D02G160300	0.492625	0.366687	0.24805	0.76986	0.415076	1.1193	OG0021260	GO:0005622	18297
TraesCS2D02G442700	0	0	0	0.0912369	0.0253951	0.419483	OG0000589	GO:0005773,GO:0005794
TraesCS2D02G257900	4.62361	3.85677	5.708	11.7118	5.59001	7.93841	OG0006130	GO:0005488,GO:0005634,GO:0005768	8820
TraesCS4B02G126200	1.78894	1.4863	1.65967	3.09231	1.79169	5.43825	OG0013539	GO:0005215,GO:0005783	4
TraesCS2A02G147800	0	0	0	0	0	0	OG0008359	GO:0005576
TraesCS5D02G219200	1.66929	1.46234	1.25773	2.25715	1.44544	3.18654	OG0006320	GO:0005576,GO:0005618	18449
TraesCS2B02G564600	0	0	0	0	0	0	OG0004816	GO:0005773
TraesCS7D02G318100	0	0	0	0	0	0	OG0019575	GO:0005634
TraesCS3A02G170100	1.55889	1.40341	1.62889	2.67143	1.32896	3.32805	OG0028082	GO:0003723,GO:0005198	9800
TraesCS4D02G244200	0	0	0	0	0	0	OG0023354	GO:0005634
TraesCS7D02G173000	5.48168	5.11548	5.95138	5.74178	6.74771	4.04272	OG0010548	GO:0000166,GO:0005634,GO:0005777	1
TraesCS4A02G186200	4.2481	3.13535	3.18782	4.15487	3.37219	3.80688	OG0006395	GO:0000166,GO:0003723	13272
TraesCS5A02G537300	4.62853	6.61164	1.06845	2.08047	0.901693	0.833599	OG0028878	GO:0005576	15
TraesCS6B02G102300	0	0	0	0	0	0	OG0024304
TraesCS4A02G440500	0.350626	0.100619	0.37693	0.128829	0.529866	0.104503	OG0003094		64
TraesCS3B02G583700	0	0	0	0	0	0	OG0017754	GO:0003676
TraesCS7D02G130900	0	0.0206387	0	0.0252558	0.0367496	0	OG0001307
TraesCS6A02G026700	2.51228	5.15834	2.43268	6.41297	1.00859	0.498796	OG0005132		19191
TraesCS2A02G335200	8.41258	8.49661	5.27509	5.71761	6.27237	4.89812	OG0006541	GO:0005739	23
TraesCS1A02G389300	0	0	0	0	0	0	OG0055199	GO:0005576
TraesCSU02G014700	0	0	0	0	0	0	OG0028225	GO:0005634
TraesCS5B02G173000	0	0.00903608	0	0.0285428	0	0.0776573	OG0001949
TraesCS2B02G162000	1.11138	0.944789	0.938126	1.34877	0.727774	0.883004	OG0007328	GO:0005634,GO:0005777	2247
TraesCS4B02G269100	0	0	0.0284978	0	0.0572398	0	OG0015118
TraesCS5B02G527100	0	0	0	0.184271	0	0	OG0000161
TraesCS4A02G290700	0	0	0	0	0	0	OG0005795	GO:0003676,GO:0003700,GO:0005634
TraesCS4D02G281500	0	0	0	0	0	0	OG0020531	GO:0005634
TraesCS3D02G483200	1.00836	1.25234	4.16812	6.80239	11.2014	21.1713	OG0013121	GO:0005634,GO:0005737	0
TraesCS4B02G149300	6.31749	5.15611	3.10896	7.29594	3.37565	6.39816	OG0003998	GO:0003677,GO:0005634	14173
TraesCS2B02G601700	0	0	0	0	0	0	OG0028228	GO:0003677,GO:0005634
TraesCS3A02G099100	0.162598	0.143722	0.162519	0.337408	0.172177	0.358012	OG0023806
TraesCS2B02G170000	0	0	0	0	0	0	OG0053769
TraesCS5D02G477900	0	0	0	0	0	0	OG0048892
TraesCS2A02G429200	0	0	0	0	0	0	OG0001157	GO:0005488,GO:0005737
TraesCS3D02G341000	1.37629	2.10316	2.40353	3.29657	5.639	7.88588	OG0011204	GO:0005737	12479
TraesCS3D02G271700	0.892458	0.81563	0.673948	1.3187	0.529399	1.81479	OG0011519		30
TraesCS5D02G436700	0	0	0	0	0	0	OG0000482
TraesCS6B02G240900	4.60608	3.56523	4.753	3.89364	3.28803	1.73146	OG0002060	GO:0005634	1
TraesCS3D02G511000	0	0.0105574	0.0110523	0.00813673	0	0	OG0003207	GO:0005618,GO:0005730,GO:0005773
TraesCS4A02G018700	0.389212	0.522137	0.257405	0.815206	0.380532	1.19682	OG0024018	GO:0005488	12867
TraesCS7D02G549300	0.233756	0.253083	0.177131	0.1817	0.193738	1.03506	OG0011132	GO:0005739	69
TraesCS7D02G356400	0.0737366	0.0582166	0.0570303	0.0444245	0.0690973	0.0499253	OG0000739
TraesCS6A02G047800	0	0	0	0	0	0	OG0017675
TraesCS2A02G386400	2.81155	4.18982	4.6169	2.82031	5.7913	2.44959	OG0004125		2189
TraesCS2D02G191600	0.117783	0.287328	0.480842	0.466497	0.0967887	0.197811	OG0014911	GO:0005634	8669
TraesCS1B02G099300	0	0	0	0	0	0	OG0003071
TraesCS1B02G425300	0.126127	0.046965	0.0610285	0.0690846	0.0698872	0	OG0016005	GO:0005488
TraesCS7D02G249700	0	0.0338836	0	0.237709	0.0789628	0.774944	OG0012759	GO:0005768
TraesCS7A02G345300	0.306786	0.33757	0.390165	0.270988	0.237209	0.331419	OG0001297	GO:0003676
TraesCS3A02G242200	2.68321	2.1432	2.54489	2.9964	2.91688	2.79477	OG0016120	GO:0005488,GO:0005634	9999
TraesCS6B02G375800	0	0	0	0	0	0	OG0000699
TraesCS3D02G086800	0	0	0	0	0	0	OG0020520
TraesCS6A02G353400	0	0	0	0	0	0	OG0008223	GO:0005737
TraesCS5A02G539200	0	0	0	0	0	0	OG0000018
TraesCS3D02G532900	0	0	0	0	0	0	OG0002423	GO:0003676,GO:0005634
TraesCS1D02G247200	0.610484	0.654586	0.805565	0.688841	1.08538	0.542283	OG0011201	GO:0005773	64
TraesCS7A02G392800	0.370997	0.716857	0.486212	0.908052	0.944919	1.20462	OG0015518		22636
TraesCS4A02G211300	0.0589532	0.179728	0	0	0	0.23766	OG0000386	GO:0003676,GO:0005783
TraesCS5A02G158100	0.0818798	0.0605824	0.142743	0.117295	0.31112	0.0881243	OG0058704	GO:0005576,GO:0005739,GO:0005773
TraesCS6A02G241500	0	0	0	0	0	0.15481	OG0001554	GO:0005618
TraesCS7D02G405700	0	0	0	0.0159352	0	0.0405438	OG0020095
TraesCS7D02G191000	0	0	0	0	0	0	OG0048591
TraesCS2D02G006200	0.521509	0.631744	0.428555	1.11964	0.996083	0.654104	OG0002341		2352
TraesCS6D02G386200	0	0	0	0	0	0	OG0046294	GO:0005515
TraesCS5D02G111900	0.0939451	0.0713125	0.0701482	0.184292	0.193796	0.555194	OG0013621	GO:0003677	0
TraesCS6B02G149000	0	0	0	0	0	0	OG0027627	GO:0003676,GO:0003700,GO:0005634
TraesCS5D02G246700	0	0.00608187	0	0.0236515	0	0.269107	OG0013485	GO:0005739,GO:0005773
TraesCS1B02G279300	0.074132	0.0526377	0	0.252801	0.0473437	1.38562	OG0053712	GO:0005618,GO:0005783	0
TraesCS4D02G038200	0.489299	0.41307	0.269072	0.674304	0.279422	1.54875	OG0050435	GO:0005768	0
TraesCS6A02G032800	0	0	0	0	0	0	OG0054324
TraesCS2A02G540600	0.0337573	0.0841209	0.0335536	0.0231581	0.0336973	0.133024	OG0057369
TraesCS3A02G172800	0	0	0	0	0	0	OG0023948
TraesCS2B02G531900	0	0	0	0	0	0	OG0023978	GO:0005634
TraesCS1D02G007300	0	0	0	0	0	0	OG0056226
TraesCS2B02G115900	0.0044455	0.0249694	0.00956766	0.0346324	0.0113551	0.0240862	OG0000568
TraesCS2A02G531100	0.378883	0.153409	0	0.234308	0.255336	0.258008	OG0028009	GO:0003723,GO:0004518,GO:0005739	2158
TraesCS2D02G412500	0.0267359	0	0	0	0	0	OG0009554	GO:0003682,GO:0003700
TraesCS5D02G404300	0.870171	0.933632	1.16291	14.9711	3.98602	91.6287	OG0000978	GO:0005618,GO:0005634	0
TraesCS6B02G104200	0.0193194	0.0219939	0.0489218	0.029337	0.0208787	0.082421	OG0000003	GO:0003676
TraesCS2D02G293000	1.1169	1.1803	0.965554	1.2572	0.936257	1.33207	OG0009731		8900
TraesCS6A02G086500	0.289853	0.218443	0.263232	0.477683	0.196082	0.129633	OG0005331		19283
TraesCS1B02G061800	0	0	0	0.0115815	0.147288	0.0294669	OG0005720
TraesCS2A02G020300	0	0	0	0	0	0	OG0005280
TraesCS6D02G342600	0	0	0.0302928	0.0418152	0	0	OG0053678
TraesCS2D02G520500	0	0	0	0	0	0	OG0014263
TraesCS2B02G475700	1.83655	2.00712	0.330039	3.54591	0.0748221	1.93823	OG0000831	GO:0005488	8059
TraesCS6A02G085000	12.4942	8.16267	13.9017	3.72785	20.537	5.13542	OG0019793	GO:0003824,GO:0005576,GO:0005634	1142
TraesCS6D02G150500	0.391091	0.759591	1.02005	0.593884	1.12955	0.115212	OG0004611	GO:0000166,GO:0003774	21232
TraesCS4A02G421200	0.00998441	0	0	0	0	0	OG0000722	GO:0003677,GO:0005634
TraesCS1D02G028400	0	0	0	0	0.0380041	0	OG0000189	GO:0005576,GO:0005618
TraesCS4B02G080100	0	0	0	0	0	0	OG0021022
TraesCS2A02G222600	2.95759	3.68426	4.91657	4.30591	4.77517	7.04164	OG0011090	GO:0003723,GO:0004518,GO:0005739,GO:0005773	6359
TraesCS6A02G141900	0	0.773179	0.265012	0.477155	0	9.02883	OG0020795	GO:0005783
TraesCS2A02G004100	0	0	0	0	0	0	OG0047215
TraesCS5D02G131000	3.23428	2.97475	3.37359	4.37313	3.1018	4.69553	OG0008873	GO:0000166,GO:0003676,GO:0005634,GO:0005764,GO:0005768	18218
TraesCS3A02G020400	0	0	0	0	0	0	OG0001068	GO:0005768
TraesCS2B02G091800	2.43247	2.69564	2.15674	4.10692	2.85859	4.43047	OG0009713	GO:0005634,GO:0005739	7222
TraesCS5B02G411400	0	0	0	0	0	0.0550895	OG0004105
TraesCS4A02G391300	0	0.0213635	0.0470495	0.0159215	0.0682177	0.0312949	OG0013402
TraesCS2D02G117700	0	0	0	0	0	0	OG0047813	GO:0003676,GO:0003824
TraesCS5A02G106800	0	0	0	0	0	0	OG0000635
TraesCS7A02G509600	0	0	0	0	0	0	OG0000000
TraesCS6D02G046500	0	0	0	0	0	0	OG0023766	GO:0003677,GO:0005730
TraesCS7B02G381000	0	0	0	0.00518852	0	0	OG0044912	GO:0005576,GO:0005739
TraesCS7B02G053000	2.47761	4.81948	4.08518	5.77143	5.42144	6.92148	OG0003449		23034
TraesCS7A02G053900	1.19606	1.22169	1.1577	3.49033	1.02997	3.56633	OG0006128		21915
TraesCS7D02G402100	0.450338	0.461015	0.258677	0.946775	0.534981	1.60533	OG0004326		24725
TraesCS3A02G205500	0	0	0	0	0	0	OG0021979	GO:0005654
TraesCS2A02G452700	0	0.0304112	0	0.281095	0.0755345	0.935647	OG0000173	GO:0000003,GO:0005576
TraesCS2A02G386000	1.73813	1.26149	1.27392	1.98233	1.22325	1.62213	OG0009439	GO:0000166,GO:0004518,GO:0005730,GO:0005739,GO:0005777	6742
TraesCS6A02G191200	1.03985	0.941345	0.617766	1.30586	0.680936	1.1805	OG0057782	GO:0003723,GO:0005634	19526
TraesCS4A02G397300	0	0	0	0	0	0	OG0000263	GO:0005634,GO:0005794
TraesCS1D02G198300	0.0121166	0.0174526	0.0609089	0.0700095	0.0764726	0.132255	OG0016997
TraesCS5D02G358800	0	0	0	0	0	0	OG0027364
TraesCS4A02G159000	0.284879	0.290605	0.0800044	0.120229	0.0769112	0.144452	OG0021296	GO:0005488
TraesCS7B02G485500	0	0	0	0	0	0	OG0001416	GO:0000166
TraesCSU02G106600	0	0	0	0	0	0	OG0046517	GO:0000166,GO:0005198
TraesCS7A02G155800	0	0	0	0.0262645	0	0	OG0023344
TraesCS4B02G062800	41.9736	38.9812	143.478	39.7292	192.21	22.4184	OG0018555		2
TraesCS1A02G277000	3.0708	2.74271	2.36586	5.07245	2.50225	11.7147	OG0007495		0
TraesCS7A02G196100	0.193427	0.0622254	1.30388	0.414583	3.74568	0.534598	OG0007371	GO:0005635	7
TraesCS4B02G150100	0	0	0	0	0	0	OG0007144	GO:0005488
TraesCS6A02G155200	5.64143	5.31443	5.22143	8.04544	5.63509	10.7322	OG0049094	GO:0005622	19435
TraesCS5A02G148200	3.08032	3.1023	1.94598	1.52538	1.51306	0.774039	OG0008664		1
TraesCS1A02G015600	0	0	0.0647004	0	0.0591683	0.069279	OG0056175	GO:0005618,GO:0005773
TraesCS1A02G079400	0.612428	0.570814	0.191583	0.0978123	0.317613	1.26393	OG0057787	GO:0005576	365
TraesCS6D02G181300	0	0	0	0	0	0	OG0045361	GO:0003676
TraesCS2B02G250100	2.0642	1.35518	1.17234	2.9225	1.85157	5.72705	OG0007060	GO:0005488,GO:0005634	0
TraesCSU02G043300	0.0248289	0.0866716	0	0	0	0.100094	OG0008472
TraesCS2B02G435300	0.1593	0.201863	0.244291	0.394005	0.37097	0.406002	OG0001365		7989
TraesCS4A02G025000	0	0	0	0	0	0	OG0000899
TraesCS3B02G081200	0.604196	0.943967	0.745387	1.09405	1.26101	0.88889	OG0007524		10683
TraesCS2B02G318500	3.59011	4.55615	3.34777	7.08933	4.0093	11.8753	OG0004554	GO:0003723,GO:0005198,GO:0005618	5
TraesCS7B02G234500	0.0168438	0.0346281	0.0362513	0.207396	0.086048	0.370786	OG0010356		191
TraesCS7A02G375400	13.5916	10.4181	17.0294	19.9181	21.6186	23.6486	OG0007270		1036
TraesCS1A02G001300	0	0	0	0	0	0	OG0013203	GO:0005739
TraesCS1D02G390500	2.22454	2.50681	1.51717	1.9639	1.18536	4.24564	OG0000574	GO:0005488	5843
TraesCS7A02G562200	0	0	0	0	0	0	OG0028819	GO:0000166,GO:0003676
TraesCS5A02G524500	2.46002	2.2442	3.0851	2.54777	3.30761	1.71029	OG0007028	GO:0005634,GO:0005737	16627
TraesCS2B02G286900	0.431114	0.316037	0.200177	1.36219	0.49834	3.09241	OG0020430	GO:0005488	94
TraesCS5D02G327400	0	0	0	0	0	0	OG0017885	GO:0005576,GO:0005618,GO:0005739,GO:0005773
TraesCS2D02G543500	0	0.034738	0	0.0507057	0	0	OG0000191
TraesCS3A02G335900	0.00704056	0	0	0	0	0	OG0000795
TraesCS7A02G142200	0.00856163	0.0267312	0	0.0545594	0	0	OG0057422	GO:0005773
TraesCS5D02G289100	0	0	0	0	0	0	OG0003896	GO:0003677,GO:0005634,GO:0005737
TraesCS3B02G210300	0.845917	0.759247	4.29246	1.76256	7.98955	0.956117	OG0001782	GO:0003677,GO:0005634	2
TraesCS4A02G197600	18.3161	23.9534	17.1534	12.2097	17.9094	4.91842	OG0003972	GO:0003723	1
TraesCS2D02G507100	2.0237	2.66574	2.06878	3.77975	2.14319	3.26414	OG0006719		9342
TraesCS7A02G549100	0.924076	0.843367	1.02533	0.786493	0.976791	0.661598	OG0047921		2003
TraesCS6A02G031900	0.222408	0.492978	0.110135	0.475646	0.201436	0	OG0000365	GO:0003677	19195
TraesCS6A02G027984	0.801876	0.914396	0.820996	1.86271	0.918625	3.12597	OG0003018	GO:0003723,GO:0004518,GO:0005634,GO:0005739	512
TraesCS3A02G522600	0	0	0	0	0	0	OG0017624
TraesCS3A02G506800	0	0	0	0	0	0	OG0017653	GO:0005488
TraesCS3D02G453500	0.0735735	0.0209543	0	0.0642645	0.0440612	0.210238	OG0017804
TraesCS5D02G084900	0.278403	0.347957	0.235072	0.38181	0.260291	0.32077	OG0047458	GO:0005773,GO:0005794
TraesCS1B02G151000	0	0	0	0	0	0	OG0000938
TraesCS6B02G237100	0.248178	0.257714	0.256043	0.403828	0.248837	0.324125	OG0057342
TraesCS6A02G007100	0	0	0	0	0	0	OG0000942
TraesCS1A02G247200	1.32076	1.10068	0.870594	1.96294	1.16409	2.3979	OG0002979	GO:0005198	1827
TraesCS3D02G240500	3.34521	4.25723	1.04151	4.03859	1.21685	4.15194	OG0000496	GO:0005488	12258
TraesCS3A02G399100	0	0	0	0	0	0	OG0059042
TraesCS5D02G121800	1.99502	2.63216	3.28312	4.07102	2.66554	3.19348	OG0048255		18191
TraesCS2D02G441700	0	0	0.0813829	0	0	0	OG0001277	GO:0005634
TraesCS2B02G249100	0.765734	0.63813	0.750575	0.864737	0.889787	1.1092	OG0014939	GO:0005773	7560
TraesCS3A02G077100	0	0	0	0.0856185	0	0.996224	OG0000574	GO:0005488
TraesCS4A02G187700	0.00836795	0.0168697	0	0.00628622	0.00978346	0.0370681	OG0003133
TraesCS1B02G191500	0	0	0	0	0	0	OG0004697	GO:0005488
TraesCS1B02G273900	12.4156	11.5515	12.6438	16.4331	15.5987	29.2782	OG0045641	GO:0005739	0
TraesCS5D02G304300	0.267576	0.358313	0.201936	0.37866	0.100033	0.311527	OG0001633		18626
TraesCS2B02G629200	0	0	0	0	0	0	OG0005110	GO:0000003
TraesCS4B02G322400	0	0.0126352	0	0	0	0	OG0023440	GO:0000166,GO:0003676
TraesCS3B02G200600	1.54097	1.28043	1.39461	1.86569	1.2596	1.69444	OG0005637		10914
TraesCS5D02G512200	0	0	0	0	0	0	OG0013764
TraesCS6D02G040600	15.0888	14.9957	2.73837	4.03814	2.25331	0.737542	OG0054242	GO:0003677,GO:0005730	15
TraesCS4D02G057100	2.48265	2.76266	1.56274	3.58927	0.821138	2.47971	OG0003566	GO:0005622	741
TraesCS4A02G084200	0	0	0.0554273	0	0.0540237	0	OG0006958
TraesCS7B02G347100	0	0	0	0.140916	0.07625	0.884466	OG0000230
TraesCS4B02G062000	0.872429	0.949307	0.644867	1.29405	1.06547	3.53811	OG0005205		0
TraesCS3B02G033200	0	0	0	0	0	0	OG0024255	GO:0005634
TraesCS5B02G136000	0.283322	0.194721	0.2627	0.306522	0.140103	0.624859	OG0009040	GO:0003723,GO:0004518,GO:0005739	17016
TraesCS6A02G393100	0.25632	0.305879	0.129721	0.283628	0.184482	0.223059	OG0017075	GO:0003723,GO:0004518,GO:0005739
TraesCS7A02G198200	3.2887	3.34317	3.01251	5.28034	3.3455	14.142	OG0005271	GO:0005618	0
TraesCS4D02G244100	0.0166495	0.00505258	0.0226531	0	0.0269901	0	OG0003324
TraesCS3A02G093300	1.648	1.50865	1.7384	2.38748	1.5159	1.67532	OG0013658	GO:0003676	2458
TraesCS3B02G246200	2.08302	1.77441	1.20549	1.95601	1.12358	3.07577	OG0000621	GO:0003677,GO:0003700,GO:0005634,GO:0005739,GO:0005783	11039
TraesCS2A02G540000	1.23812	1.63781	1.55614	1.30655	1.39342	1.30016	OG0009574	GO:0005488,GO:0005634,GO:0005737	7009
TraesCS2A02G359900	1.53581	1.82858	1.61913	1.83365	1.43464	1.32612	OG0021537	GO:0003676,GO:0005634,GO:0005737	6675
TraesCS4B02G021600	0	0	0	0	0	0	OG0015353
TraesCS4A02G369800	0	0	0	0	0	0	OG0001554	GO:0005618,GO:0005737
TraesCS7B02G246500	2.76758	3.11847	2.08553	2.56369	2.25662	1.48607	OG0003747	GO:0005488,GO:0005773	1
TraesCS2B02G437300	0.189191	0.0837458	0.0535591	0.160013	0.0968112	0.334762	OG0000327
TraesCS5B02G396200	9.36305	7.84637	9.03744	9.25817	7.84986	4.89929	OG0048566	GO:0005654,GO:0005737	1
TraesCS2D02G201000	0.528401	0.427369	0.555916	1.21465	0.485818	2.08318	OG0003362		85
TraesCS7D02G078100	1.35686	1.24633	1.27661	1.97982	1.37649	2.68141	OG0010549		108
TraesCS6D02G174700	0.40177	0.445896	0.626296	0.287454	0.696767	0.16409	OG0012793		2
TraesCS1D02G261100	0.0805571	0	0	0	0	0	OG0008547
TraesCS4A02G399400	0.0104374	0.0103625	0.0449271	0.09544	0.100696	0.0565511	OG0004188	GO:0005634
TraesCS6A02G242100	1.65847	1.46872	1.53045	1.85922	2.29461	3.41749	OG0058412		19649
TraesCS5D02G094000	24.1346	25.629	10.6386	11.1497	9.24895	3.14673	OG0012720	GO:0005654,GO:0005730	1
TraesCS2A02G575000	0.085455	0.0556634	0	0.0794021	0.0697933	0	OG0002551
TraesCS7A02G412800	0.00588238	0.00857795	0.00576766	0.00875988	0.00492301	0	OG0017594
TraesCS4D02G239400	0.80165	1.1995	1.27117	1.78323	1.27508	1.46095	OG0028727	GO:0005634,GO:0005737	15265
TraesCS1D02G068900	0.360289	0.289716	0.275762	0.280308	0.16547	0.348801	OG0000009	GO:0003723,GO:0004518,GO:0005739	5114
TraesCS4B02G048600	0	0	0	0	0	0	OG0000535	GO:0005634,GO:0005737
TraesCS6B02G466500	0	0	0	0	0	0	OG0000042	GO:0003677,GO:0003700
TraesCS6B02G450800	0	0	0	0	0	0	OG0027931	GO:0003824
TraesCS2A02G162700	3.46388	4.5865	4.14543	5.27824	4.71722	5.72757	OG0059096	GO:0000166,GO:0003723	6210
TraesCS4B02G322200	0.0982129	0	0.0481058	0.0847318	0.0485676	0.359345	OG0015354
TraesCS4B02G254700	0.172551	0.599257	0.202282	0.838599	0.0922051	0.660642	OG0018569		14440
TraesCS2A02G415000	0	0.0474295	0	0.08706	0.0499021	0.166695	OG0053353
TraesCS3B02G485600	4.61644	5.59465	5.88002	6.7026	3.51083	3.5164	OG0019260		2625
TraesCS1A02G128200	0	0	0	0	0	0	OG0044840
TraesCS3A02G297500	5.43537	5.98516	4.77076	3.72487	5.634	2.02144	OG0011603	GO:0005634	1
TraesCS2B02G497400	1.01203	1.43955	1.44977	2.08857	1.65988	1.95239	OG0006544	GO:0005488,GO:0005634	8104
TraesCS5D02G164400	2.48274	1.97573	2.23206	3.06083	1.99258	1.91038	OG0008782	GO:0005576	18307
TraesCS2B02G512200	0	0	0	0	0	0	OG0009468
TraesCS5A02G427200	0.317233	0.386451	0.380979	0.437308	0.250807	0.136842	OG0008534		16441
TraesCS1B02G160100	0.908432	1.05924	0.909163	1.41525	1.03502	2.20516	OG0013260	GO:0003676	4325
TraesCS3A02G371400	0.269486	0.281448	0.0670091	0.392006	0.209652	0.848344	OG0007849	GO:0005488,GO:0005634	222
TraesCS4A02G053900	2.41781	3.25506	2.69915	2.30087	1.36239	0.514893	OG0010037	GO:0003723,GO:0004518,GO:0005739	1109
TraesCS3D02G312800	1.18513	0.997121	1.57801	2.00254	1.63561	4.33282	OG0007858	GO:0005737,GO:0005773,GO:0005783	8
TraesCS3D02G289000	3.14349	2.54282	3.54833	3.27335	3.82881	2.35574	OG0007556	GO:0003700,GO:0005634,GO:0005737	282
TraesCS6A02G097900	0.434813	0.41758	0.487653	0.517163	0.662075	0.67704	OG0012920		19309
TraesCS1B02G333800	1.10454	2.10558	0.727688	2.10669	0.403015	4.91137	OG0046071	GO:0005576,GO:0005618,GO:0005773	30
TraesCS7B02G209800	0.669038	0.76674	0.562462	1.04995	0.607084	1.17678	OG0012304	GO:0003676	23393
TraesCS1A02G085000	0.152051	0.133344	0.130554	0.307398	0.183994	0.131177	OG0016309	GO:0003677,GO:0005737
TraesCS3B02G123600	3.16344	4.44696	3.11619	5.14732	2.73657	5.27079	OG0019073	GO:0003676,GO:0005634	10761
TraesCS3A02G250200	190.373	159.937	264.631	89.1546	483.822	23.3892	OG0011418	GO:0005739	2
TraesCS5B02G526400	0.465929	0.392291	0.391516	0.878364	0.402657	0.802585	OG0020210	GO:0003676	17829
TraesCS1B02G177700	0.719625	0.493562	0.40499	0.784694	0.735416	0.802397	OG0000059	GO:0003676,GO:0005634	4378
TraesCS3B02G362000	0	0	0	0	0	0.0538673	OG0001814
TraesCS3B02G471400	0.527232	0.530938	0.459071	0.646146	0.4923	0.630774	OG0007633	GO:0005515,GO:0005737	11543
TraesCS1D02G263600	0.145705	0.155528	0.0963363	0.22826	0.0939595	1.43929	OG0016015	GO:0003677,GO:0005634	0
TraesCS1B02G254800	2.32451	2.25113	2.63827	3.68307	3.03904	3.31051	OG0002292	GO:0005622,GO:0005730	4597
TraesCS6A02G079200	0	0	0	0	0	0	OG0023001
TraesCS2A02G364800	0.390839	0.317919	0.112218	0.73669	0.385729	0.162386	OG0008803	GO:0005488
TraesCS5B02G124700	0.584017	0.396689	0.395365	0.615184	0.435904	0.690023	OG0003272	GO:0003700,GO:0005634	16981
TraesCS3B02G445500	0.907573	0.464579	0.580306	0.959572	0.681641	0.781897	OG0045888	GO:0005488,GO:0005634	11498
TraesCS3D02G109700	0.0945268	0.0863921	0.0880763	0.15567	0.096441	0.042081	OG0007587	GO:0005730
TraesCS7A02G152500	0	0	0	0	0	0	OG0017516	GO:0003677,GO:0005634
TraesCS3D02G094300	0	0	0	0.0554876	0	0	OG0003079
TraesCS5A02G260800	0.0535834	0.101732	0.150459	0.210403	0.15017	0.147749	OG0001459	GO:0003676,GO:0005622
TraesCS7A02G497600	0	0	0	0	0	0	OG0010009
TraesCS6A02G216600	0.744212	0.685844	0.616278	1.06497	0.625283	1.35352	OG0004613	GO:0005634,GO:0005739	19589
TraesCS2D02G339300	2.15283	2.03277	2.01952	2.61445	1.92965	3.63587	OG0010841	GO:0005739	9001
TraesCS3A02G361500	0	0	0	0.0532107	0	1.74026	OG0007823	GO:0005783,GO:0005794
TraesCSU02G240400	0	0	0	0	0	0	OG0007163	GO:0005634
TraesCS4A02G389500	0.210565	0.23299	0.385902	0.305827	0.942163	0.149314	OG0008459	GO:0005634	448
TraesCS1B02G287500	24.919	38.6866	28.788	47.4873	4.21151	9.93414	OG0001457		16
TraesCS2B02G435400	1.77214	1.5698	1.36528	1.96555	1.84638	2.89388	OG0006511	GO:0005773	1487
TraesCSU02G164000	0	0	0	0	0	0	OG0000803	GO:0005634,GO:0005777,GO:0005783
TraesCS3B02G568000	0	0	0	0	0	0	OG0000972	GO:0005198,GO:0005618,GO:0005622,GO:0005730,GO:0005773
TraesCS1D02G106900	0	0	0	0.00733747	0	0	OG0017648
TraesCS3B02G017800	1.90784	2.18201	0.473225	0.652904	0.896128	0.494458	OG0018520	GO:0004518	23
TraesCS1D02G242500	65.644	76.8514	92.9019	42.2567	98.5513	22.5779	OG0016184	GO:0003723,GO:0005198,GO:0005634	1
TraesCS3D02G097100	0	0	0.0274025	0	0	0	OG0049025
TraesCS1D02G227400	0	0.0168429	0	0	0.0599816	0	OG0016339
TraesCS5D02G502500	0	0	0	0.173398	0	0.36355	OG0015765
TraesCS7A02G300900	1.35887	0.764416	9.82032	0.385188	0.548264	44.4441	OG0025606		9
TraesCS6A02G265600	0.0253521	0.0134748	0	0.0188293	0	0.0686801	OG0019547	GO:0000166,GO:0003676
TraesCS7D02G499900	0	0.00538004	0	0	0	0.0204031	OG0005988
TraesCS3D02G249800	0	0	0	0	0	0	OG0009886	GO:0005488
TraesCS7D02G491200	0.0347553	0	0	0.494837	0.0551305	0.636397	OG0024169	GO:0005737
TraesCS1D02G024900	0	0	0	0	0	0	OG0000134
TraesCS7B02G348500	0.348294	0.293014	0.512443	0.682518	0.41582	0.357021	OG0014065	GO:0005622	23710
TraesCS6B02G426500	0	0	0	0	0	0	OG0013307
TraesCS2D02G227900	2.32154	2.81651	2.46236	3.28921	2.33909	4.77909	OG0006990	GO:0000166,GO:0003723,GO:0005634	8740
TraesCS7D02G162400	0.229252	0.341344	0.410813	0.437685	0.313737	0.903267	OG0021587		24172
TraesCS1D02G022900	0.660452	0.479265	0.481606	0.790263	0.488529	0.695898	OG0001792	GO:0005737	1881
TraesCS7B02G165200	0	0	0	0	0	0	OG0000220	GO:0005634,GO:0005737
TraesCS7B02G438000	1.22253	1.49192	1.0508	2.07778	1.01049	2.25619	OG0002840	GO:0005634	23846
TraesCS3B02G341600	0.246491	0.158385	0.135884	0.133042	0.193246	0.0984282	OG0007798	GO:0003723,GO:0005737
TraesCS1A02G102300	4.19197	2.86906	3.13044	6.51785	4.64615	8.40641	OG0001144	GO:0003824,GO:0005488,GO:0005768,GO:0005773,GO:0005794	1800
TraesCS4B02G138400	0	0	0	0	0	0	OG0015660	GO:0005794
TraesCS3A02G193200	2.01644	2.04187	1.48421	5.64859	2.87976	10.7869	OG0057508	GO:0003824,GO:0005198,GO:0005488,GO:0005794	4
TraesCS7D02G458500	0.450337	0.387492	0.507775	0.620283	0.64111	0.270808	OG0010345		2
TraesCS2A02G113400	0	0	0.133309	0	0.131684	0.154187	OG0013357	GO:0000166
TraesCS1B02G428100	0.0812833	0.0628978	0.0541771	0.076566	0.0969193	0.165201	OG0008584	GO:0005783,GO:0005794
TraesCS5D02G405300	3.05442	3.19895	2.66237	5.15261	1.81928	1.92823	OG0010525		306
TraesCS7A02G154300	0.0168438	0.0179051	0	0.156793	0	0.0524577	OG0001555	GO:0005488
TraesCS5D02G155700	2.73749	2.1169	2.44327	2.87028	1.97058	2.04098	OG0001698	GO:0003676	18288
TraesCSU02G145300	0	0.0219972	0.0560553	0.0343784	0.441002	0	OG0050636	GO:0005618
TraesCS1D02G391700	0	0	0	0	0	0	OG0029233	GO:0003677
TraesCS3D02G480800	0.691032	0.447274	0.570941	0.467733	1.2095	0.332521	OG0013386		393
TraesCS1D02G210200	42.8393	41.3996	27.8645	18.2739	25.7014	7.8081	OG0019614		1
TraesCS6D02G292300	0	0	0	0	0	0	OG0028458	GO:0005622,GO:0005634
TraesCS3B02G556100	0	0	0	0	0	0	OG0023721
TraesCS1B02G054700	0	0	0	0	0	0	OG0002667	GO:0005488
TraesCS5A02G440600	0.3274	0.235329	0.454879	0.420422	0.248865	0.0775855	OG0056744		16464
TraesCS4B02G269200	1.31412	0.645323	2.23101	1.64174	2.37256	2.74345	OG0007433	GO:0005777	908
TraesCS2D02G426700	0	0	0	0	0	0	OG0004029	GO:0003723,GO:0005737
TraesCS2D02G303200	0.633027	0.540793	0.605668	0.798017	0.536095	0.710943	OG0009314	GO:0005739,GO:0005783	8924
TraesCS7A02G133400	1.14848	0.981299	1.01074	1.61526	1.39399	1.43027	OG0009679		22050
TraesCS2D02G164700	0	0	0	0	0	0	OG0008489
TraesCS4B02G243000	2.42806	2.88479	1.90992	2.43913	2.45218	1.34693	OG0018931		791
TraesCS5A02G077000	0.103452	0.0380421	0.0703643	0.0169097	0.0706657	0	OG0008438	GO:0003824,GO:0005773
TraesCS5D02G200600	0	0	0	0.0284226	0	1.29026	OG0001951	GO:0003677
TraesCS2D02G005300	0	0	0	0	0	0	OG0023198	GO:0005737
TraesCS2A02G106400	0	0	0	0	0	0	OG0023932	GO:0005622
TraesCS4B02G268900	0	0	0	0	0	0	OG0014488	GO:0005576
TraesCS3D02G123100	0	0	0	0.0390922	0	0	OG0016759	GO:0005737
TraesCS6A02G168100	0.111993	0.0819839	0.104471	0.124614	0.113927	0.16347	OG0012623
TraesCS3D02G108700	0	0	0	0	0	0.106546	OG0011747
TraesCS2A02G116200	0	0	0	0	0	0	OG0004811	GO:0005634
TraesCS1D02G068800	0.121175	0.189619	0.291172	0.304035	0.177724	0.451955	OG0000009	GO:0003723,GO:0004518,GO:0005739	5113
TraesCS5D02G058800	0	0.0313327	0.140479	0.242002	0.177515	0.080389	OG0012195
TraesCS2A02G432600	8.9406	8.79959	7.80412	13.7455	8.58312	25.118	OG0002053	GO:0003723,GO:0005198,GO:0005618,GO:0005730,GO:0005773	5
TraesCS5D02G308500	0	0.0426357	0	0	0.0866913	0	OG0053013	GO:0003677,GO:0005730,GO:0005773
TraesCS7D02G247000	5.89208	4.9338	5.23968	7.86237	4.40387	14.4735	OG0012934	GO:0005773,GO:0005783,GO:0005794	0
TraesCS3B02G195200	0	0	0	0	0	0	OG0017700	GO:0005622,GO:0005634
TraesCS5A02G103900	0.509279	0.333076	0.387418	0.517116	0.352447	0.550454	OG0016183	GO:0005622,GO:0005634	2750
TraesCS2A02G214900	0.651938	0.660351	0.52098	0.919172	0.556069	1.334	OG0009902	GO:0005198,GO:0005739	6339
TraesCS5D02G227500	0	0	0	0	0.13665	0	OG0000038	GO:0005488
TraesCS2D02G084800	0	0	0	0	0	0	OG0003116	GO:0005634
TraesCS2A02G363900	0	0	0	0	0	0	OG0045706
TraesCS5A02G005600	0	0	0	0	0.0150401	0	OG0027902	GO:0005783,GO:0005794
TraesCS3D02G506800	0	0	0	0	0	0	OG0023263
TraesCS4D02G192500	0.151484	0.0970626	0.0863525	0.086041	0.101937	0.0824492	OG0010620
TraesCS4A02G311600	0	0	0	0	0	0	OG0022775	GO:0000003,GO:0003677
TraesCS2D02G482000	2.56428	2.15252	2.68658	2.14095	2.36349	1.14142	OG0028681		297
TraesCS1B02G173600	1.12851	0.924499	1.45917	2.26576	2.26948	8.03652	OG0008270	GO:0005768,GO:0005783	0
TraesCS4D02G357000	0.455772	0.666691	0.154994	1.98391	0.572378	1.53286	OG0023416		15481
TraesCS3A02G241100	0	0	0	0	0	0	OG0001455	GO:0005576,GO:0005773
TraesCS2A02G462500	0	0.00838946	0	0	0	0.0245791	OG0014107	GO:0003677,GO:0005634
TraesCS2A02G112200	0	0	0	0	0	0	OG0049637
TraesCS4D02G347100	3.67503	3.13334	1.74743	1.21075	1.79768	1.00865	OG0057556	GO:0005654	23
TraesCS7A02G133900	0	0	0	0	0	0	OG0000105	GO:0005488
TraesCS1A02G021600	0	0	0	0	0	0	OG0000204	GO:0005783
TraesCS6D02G124600	0.53929	0.63973	0.731875	0.633916	1.00655	0.753122	OG0028013		21175
TraesCS3D02G321100	0	0.0182925	0	0	0.0384923	0.0607506	OG0021749	GO:0003676,GO:0005634
TraesCS5B02G145100	0.155008	0.248605	0.199896	0.242786	0.0745168	0.568916	OG0004862	GO:0005634,GO:0005768	17044
TraesCS1B02G299100	37.0081	33.7007	22.5532	92.8581	32.7772	37.7975	OG0024515	GO:0005488	4699
TraesCS2A02G077600	0	0	0	0	0	0	OG0013407
TraesCS2D02G278600	0.0098627	0.0104842	0	0	0	0.101192	OG0001949
TraesCS4D02G234200	0	0	0	0	0	0	OG0015073	GO:0005773
TraesCS7D02G077700	0	0	0	0	0	0	OG0002212
TraesCS2D02G268900	0.80522	0.69362	0.578293	1.21704	0.80073	0.817232	OG0004293		8841
TraesCS4D02G366000	0.584996	0.78236	0.584948	1.09824	0.829046	1.23647	OG0020218	GO:0005634,GO:0005737	15499
TraesCS2B02G624700	0	0	0	0	0	0.110834	OG0017790
TraesCS5A02G071600	2.2564	1.68621	2.54882	3.19048	1.9268	1.61243	OG0054288		15645
TraesCS1D02G272800	0.028729	0.00667287	0.0170045	0.051029	0	0.0782796	OG0051327
TraesCS6B02G228300	0.269648	0.278253	0.270986	0.384626	0.20666	0.285892	OG0019871
TraesCS6B02G404300	0	0	0	0	0	0	OG0017595
TraesCS3A02G114100	0	0	0	0	0	0	OG0048901	GO:0005634,GO:0005739,GO:0005783
TraesCS2D02G349400	0.0971409	0.507197	0.227008	0.786373	2.53189	2.34791	OG0028336	GO:0005622	9029
TraesCS6D02G383200	1.83127	1.61063	1.55447	2.4018	1.56955	3.38576	OG0008103	GO:0005488	21789
TraesCS4B02G124200	5.83355	5.12993	4.95008	4.73425	4.63406	2.89376	OG0011668	GO:0003824	1
TraesCS4B02G060800	0	0	0	0	0	0	OG0000104	GO:0005737
TraesCS2A02G286000	0.800022	0.768992	0.861368	0.856037	0.852565	0.987241	OG0003334	GO:0003824,GO:0005737	6513
TraesCS2A02G211200	0.537249	0.327916	0.505245	0.398341	0.70451	0.481955	OG0014587	GO:0005515	7
TraesCS5B02G179100	0.28449	0.204887	0.412825	0.371666	0.411942	0.234507	OG0015034		17134
TraesCS5A02G428700	1.26337	1.12415	0.715531	1.96901	1.51016	4.90389	OG0024214	GO:0005576	0
TraesCS2A02G431300	0	0	0	0	0	0	OG0008434	GO:0003676
TraesCS2A02G255300	0.715676	0.575483	0.342214	0.768726	0.341488	0.812827	OG0015254		6436
TraesCS7A02G047400	0	0	0	0	0	0	OG0056883	GO:0005634
TraesCS1A02G014700	0	0	0	0	0	0	OG0000077	GO:0003723,GO:0005198
TraesCS1D02G096800	0	0	0	0	0	0	OG0010628
TraesCS2D02G134000	1.16376	0.71617	1.54654	0.929931	1.62302	1.26914	OG0007204	GO:0005198,GO:0005488	102
TraesCS1B02G277200	0	0	0	0	0	0	OG0005578	GO:0005634,GO:0005794
TraesCS2B02G331600	0	0	0	0	0	0	OG0001546	GO:0005739
TraesCS2D02G426900	0	0	0	0	0	0	OG0003339	GO:0005198,GO:0005739
TraesCS2B02G577000	0	0	0	0	0.0110536	0	OG0000830	GO:0005622,GO:0005737
TraesCS3A02G431500	0	0	0	0	0	0	OG0000047	GO:0005198
TraesCS1A02G312200	0.0338264	0.0329712	0.0345168	0.024885	0	0	OG0057748
TraesCS6D02G138100	0.0381346	0.0148883	0	0.439292	0.0626581	0.913341	OG0000776
TraesCSU02G230000	0	0	0	0	0	0	OG0000205
TraesCS2A02G571200	0	0	0	0.0430816	0	0	OG0008500
TraesCS5D02G312600	0	0	0	0	0	0	OG0000236	GO:0005634,GO:0005737
TraesCS6D02G371900	11.0231	11.2713	10.4258	8.29871	12.463	4.30697	OG0016593	GO:0005634	1
TraesCS5A02G414400	440.102	565.807	568.298	324.401	362.844	48.7499	OG0010232		1
TraesCS3D02G178200	0	0	0	0	0	0	OG0050471
TraesCS2A02G314000	0	0	0	0	0	0	OG0000039
TraesCS4A02G109400	0.757468	0.491701	0.295048	0.0983282	0.773191	0	OG0015003	GO:0005783	890
TraesCS6B02G013000	0	0	0	0	0	0	OG0028499
TraesCS2A02G050100	0	0	0	0	0	0	OG0020891
TraesCS1B02G340900	0	0	0	0	0	0	OG0019267
TraesCS2A02G035800	0	0	0	0	0	0	OG0000112
TraesCS1A02G126800	3.41661	4.54922	3.09667	6.8188	1.73112	4.06673	OG0002935	GO:0005634,GO:0005739	461
TraesCS5B02G315600	0.470341	0.391552	0.456924	0.748795	0.244914	1.14524	OG0006387	GO:0003700,GO:0005634	17422
TraesCS2D02G140200	0.183971	0.0927207	0.408404	0.129565	0	0	OG0018671
TraesCS6D02G375600	1.08303	0.578161	0.850586	0.751364	0.996702	0.646308	OG0003008		1448
TraesCS5B02G225600	0	0	0	0	0	0	OG0008977	GO:0005576
TraesCS6D02G118000	0.543675	0.334493	0.385491	0.506473	0.410651	0.605824	OG0008533		21159
TraesCS6A02G287700	15.3004	16.7709	25.1573	23.3837	16.4422	12.3664	OG0019609	GO:0003677,GO:0005634	19754
TraesCS5A02G488300	0	0	0	0	0	0	OG0024346
TraesCS2B02G031000	0	0	0.0603669	0	0.2352	0.0337215	OG0000596
TraesCS1D02G079200	0.0346317	0.0364167	0	0	0.0394406	0.114289	OG0019057	GO:0005576
TraesCS7B02G372500	1.94505	1.83212	3.39021	2.55066	3.81031	2.87823	OG0050382	GO:0003677,GO:0003682,GO:0005634	2
TraesCS1D02G074200	5.23947	3.86294	4.04396	6.29968	3.73975	4.23335	OG0001935		5122
TraesCS3A02G347200	0.300897	0.0347168	0	0	0	0.108903	OG0055814	GO:0003677,GO:0005730,GO:0005773
TraesCS4D02G207100	0.0565142	0.141911	0.071848	0.153717	0.17105	0.100672	OG0057909	GO:0005618,GO:0005634,GO:0005739,GO:0005773,GO:0005794
TraesCS7D02G206800	0.00535527	0.00308207	0	0.00771125	0.0064855	0.0216644	OG0001848	GO:0005622
TraesCS6B02G359500	0.015827	0	0.118438	0.0675616	0.0891895	0.242603	OG0001776	GO:0005576
TraesCS6B02G282700	1.1456	1.29602	0	4.76258	0	9.38037	OG0019321		14
TraesCS5B02G500900	3.90288	4.28572	2.3882	1.08794	3.41199	0.812572	OG0009993	GO:0003677,GO:0004518	1
TraesCS5A02G469400	0.549518	0.714063	0.515921	0.730416	0.652535	1.24699	OG0010830		16526
TraesCS1D02G090600	0.672925	0.632072	0.530037	1.02614	0.721661	1.28387	OG0012461		5157
TraesCSU02G237800	0	0	0	0	0	0	OG0000828	GO:0005488
TraesCS5B02G217000	0	0.0176082	0.0255241	0.00765986	0.0300068	0.0157097	OG0022979	GO:0005488,GO:0005773
TraesCS4B02G343287	0	0	0	0	0	0	OG0002691	GO:0003723,GO:0004518,GO:0005739
TraesCS4D02G288300	0.0716645	0.0731527	0.111166	0.0770058	0.0798106	0.0461747	OG0004583
TraesCS6D02G020500	0	0	0	0	0	0	OG0021049
TraesCS2D02G318900	0	0	0	0	0	0	OG0004850
TraesCS4D02G102200	8.00778	4.30497	20.3852	19.3596	55.4668	121.624	OG0001953	GO:0005634,GO:0005737	0
TraesCS7A02G114700	0	0	0	0	0	0	OG0001539	GO:0005515
TraesCS4A02G099400	5.6856	4.32986	3.9671	7.64263	4.14367	11.2677	OG0007408	GO:0003677,GO:0005634,GO:0005794	11
TraesCS3D02G391200	0	0	0	0	0	0	OG0016958
TraesCS4B02G302700	2.21117	1.72752	1.79231	2.99975	2.04963	3.21938	OG0004214	GO:0003676	14538
TraesCS5D02G335600	0	0	0	0	0	0	OG0003367	GO:0005576,GO:0005618
TraesCS2A02G193600	0.0877022	0.105059	0.139121	0.159354	0.0322192	0.201153	OG0049434	GO:0003676,GO:0005634,GO:0005783,GO:0005794
TraesCS1A02G398700	0	0	0	0	0	0	OG0004806
TraesCS3B02G551400	0	0	0	0	0	0	OG0051659	GO:0005488
TraesCS1D02G208800	8.98492	7.13537	8.12825	7.84691	7.55523	5.45399	OG0012431		2060
TraesCS1B02G170400	0.489833	0.604944	0.604068	0.562125	1.01451	0.405778	OG0016426		4351
TraesCS2A02G489700	7.77269	6.96689	5.67121	11.0502	6.4857	14.4158	OG0002725	GO:0005488,GO:0005576,GO:0005773,GO:0005777	11
TraesCS1D02G449300	0	0	0	0	0.0181317	0	OG0008420
TraesCS5D02G207700	0	0	0	0	0	0	OG0000384	GO:0003677,GO:0005634
TraesCS4A02G163400	0.386907	0.288663	0.26683	0.404944	0.302749	0.326295	OG0002234		13213
TraesCS7D02G248900	1.73142	1.43664	1.52046	2.20329	1.58132	2.49672	OG0012242	GO:0003677,GO:0003824	24353
TraesCS5D02G548100	0	0.0181295	0	0.0443705	0.0736593	0	OG0000065
TraesCS5A02G176700	0.266845	0.452542	0.292976	0.625974	0.269385	0.909887	OG0014012		15933
TraesCS2D02G548600	1.0135	0.598292	0.125264	0.359173	0.183731	0.199971	OG0005600	GO:0005634,GO:0005773	121
TraesCS7D02G528300	0.010547	0.004836	0	0	0	0.0679526	OG0021705
TraesCS5A02G432900	0.198207	0.0492922	0.569277	0.56022	0.200452	0.833827	OG0000335		16453
TraesCS3A02G484862	0	0	0.0163219	0	0	0	OG0054474
TraesCS3A02G443800	0.084366	0.0188915	0.0292615	0.0350947	0.0147581	0.0806027	OG0011411
TraesCS7A02G249800	0	0	0	0	0	0	OG0006114
TraesCS1D02G256600	1.02677	1.38174	0.670533	2.17988	0.903662	4.50468	OG0016326		925
TraesCS1B02G453900	0	0	0	0	0	0	OG0029347
TraesCSU02G256900	0	0	0	0	0	0	OG0017748	GO:0003677,GO:0005634
TraesCS2D02G214800	2.46726	2.10394	3.13432	2.71247	3.49007	2.16764	OG0001979	GO:0005634	2
TraesCS6A02G204300	1.34643	1.00243	0.918694	1.20199	0.860425	0.608634	OG0016962	GO:0003677,GO:0003700,GO:0005634	1006
TraesCS6D02G099600	0	0	0	0	0	0	OG0002131
TraesCS5A02G283300	0.202696	0.265085	0.140726	0.356474	0.23422	0.315705	OG0004076
TraesCS2B02G075100	0	0	0	0	0	0.0152889	OG0052362
TraesCS1A02G203800	1.49013	1.64931	1.24914	2.7541	1.2332	2.92508	OG0003775	GO:0005783	3554
TraesCS2B02G427400	0	0	0	0	0	0	OG0001842
TraesCS7D02G355800	0.0412401	0	0	0.0442136	0.0482162	0	OG0002345
TraesCS1B02G085100	3.11304	2.68198	2.88683	5.48558	3.50438	18.0486	OG0019323	GO:0005739	0
TraesCS4B02G119300	0	0	0	0	0	0	OG0021617	GO:0005634
TraesCS3D02G291000	1.42331	0.857422	0.628837	2.08497	0.903892	1.76397	OG0015539		12372
TraesCS3D02G019300	0.0652597	0.126196	0.589486	0.115412	3.18826	0.128581	OG0017762		189
TraesCS6D02G366400	0	0	0	0	0	0	OG0050605	GO:0005634
TraesCS3A02G065400	0	0	0	0	0	0	OG0013459
TraesCS1D02G153400	0.514854	0.495475	0.673859	0.447788	1.27031	0.362656	OG0020822	GO:0005737	79
TraesCS1A02G416600	11.9604	11.9715	15.1147	18.4314	17.5098	16.7588	OG0004183	GO:0005634	3990
TraesCS6D02G331800	1.65246	1.33491	1.75009	1.32327	1.66566	1.32326	OG0003465		21677
TraesCS5B02G237300	0.0343357	0.00888243	0	0	0	0.0789586	OG0008956	GO:0005488
TraesCS4B02G006200	0.16641	0.235665	0.236833	0.243016	0.188078	0.306178	OG0048546
TraesCS6D02G340600	0	0	0	0	0.0225046	0	OG0023494
TraesCS2D02G489800	0	0	0	0	0	0	OG0001371	GO:0005634
TraesCS2B02G385700	2.89385	2.29912	2.03929	3.22684	2.14861	2.93698	OG0014402	GO:0005198,GO:0005634,GO:0005773	7892
TraesCS5B02G540400	0	0	0	0	0	0	OG0000065
TraesCS5A02G246900	0.0866975	0.0729046	0.0583045	0.0918655	0.0511369	0.0807071	OG0004835	GO:0003676,GO:0005768
TraesCS2D02G071400	5.47146	6.29579	3.51806	3.0635	3.36838	1.94517	OG0006548		1
TraesCS4A02G410200	0	0	0	0	0	0	OG0000590	GO:0003824,GO:0005737
TraesCS5B02G058700	0	0	0	0	0	0	OG0000181
TraesCS1B02G373400	0.242762	0.257291	0.38118	0.375729	0.311707	0.349785	OG0028699		4831
TraesCS2B02G097900	0.0450109	0	0.0179887	0.0110323	0.0181614	0.117993	OG0053127	GO:0005515
TraesCS7B02G339900	0	0	0	0	0	0.0175658	OG0008525	GO:0005634
TraesCSU02G187900	0	0	0	0	0	0	OG0020982	GO:0003700,GO:0005634,GO:0005739
TraesCS5D02G182500	2.02096	1.77822	1.27539	5.66321	2.52248	26.3371	OG0005039	GO:0005739,GO:0005773	0
TraesCS7B02G103600	50.916	66.1642	65.731	86.2724	63.0251	73.4795	OG0010058	GO:0005777	1723
TraesCS3A02G398300	9.0043	8.04936	8.44172	12.6546	9.93989	25.3364	OG0007529	GO:0003723,GO:0005576,GO:0005618,GO:0005773,GO:0005783	0
TraesCS7A02G425400	1.06902	1.07213	0.703293	1.58841	1.01964	2.61494	OG0001097		22695
TraesCS6D02G221100	0.0445265	0	0.0442578	0	0.0444474	0	OG0017048	GO:0005773
TraesCS2D02G321100	0.451468	0.457087	0.363904	1.12671	0.598961	2.61365	OG0006724		8
TraesCS2B02G233700	0	0	0	0	0	0	OG0000187
TraesCS5A02G290100	0	0	0	0	0	0	OG0017255	GO:0003723,GO:0005634,GO:0005737
TraesCS2D02G259100	0	0	0	0	0	0	OG0011073
TraesCS2D02G405000	7.63028	7.52944	8.7424	9.64512	8.14895	13.6529	OG0022883		201
TraesCS2D02G276100	2.98094	3.80998	2.08766	1.787	2.1236	2.03039	OG0007237	GO:0003723,GO:0004518,GO:0005739	174
TraesCS7A02G539400	0	0	0	0	0	0	OG0028067
TraesCS4D02G232300	4.59326	4.93756	4.77802	9.0412	6.68005	17.6389	OG0005406	GO:0003676,GO:0005198,GO:0005768,GO:0005773	0
TraesCS7A02G172400	0.456707	0.496241	0.903437	1.24572	0.711709	1.49119	OG0015282	GO:0005634	22103
TraesCS6B02G440700	0	0	0	0.0350233	0	0.0611481	OG0001695
TraesCS1A02G294200	0	0	0	0	0	0	OG0017757
TraesCS1A02G062600	0	0	0	0	0	0	OG0000085	GO:0005737
TraesCS5A02G313000	0.824195	1.03602	0.361691	1.21562	0.150388	1.8873	OG0001623	GO:0005576,GO:0005794	16207
TraesCS1A02G127800	0	0	0	0	0	0	OG0028894	GO:0005654,GO:0005737
TraesCS3D02G097700	0	0	0	0.00866128	0.0143786	0.114923	OG0011276	GO:0003682
TraesCS1B02G041400	0.621872	0.522477	0.812267	0.985207	1.41109	4.67029	OG0005594	GO:0005576	0
TraesCS7D02G512600	0.0211382	0.0766056	0.035685	0.0646645	0.0664546	0.0665813	OG0006932	GO:0003677,GO:0003700,GO:0005634
TraesCS1D02G063200	0	0	0	0	0	0	OG0054112	GO:0005739
TraesCS5B02G111200	17.0719	24.8623	15.1847	10.3806	15.1103	8.72959	OG0003276	GO:0003824,GO:0005634,GO:0005739,GO:0005773	1
TraesCS6A02G108900	0.9937	1.02074	1.02213	0.826864	1.30444	1.26745	OG0003253	GO:0005515,GO:0005634	19336
TraesCS2A02G415300	0.0452773	0.11131	0.255338	0.996338	1.07264	4.69855	OG0018240	GO:0003677,GO:0003700,GO:0005634	0
TraesCS6B02G290600	0.457095	0.75787	0.357957	1.1378	0.429472	1.85778	OG0019821	GO:0005634	928
TraesCS6D02G374000	0	0	0	0	0	0	OG0020379
TraesCS5B02G383400	0.0163167	0	0.621792	0.555314	1.26863	5.49393	OG0015476		0
TraesCS6D02G294500	12.8881	14.1502	12.7087	18.2905	10.8816	14.2041	OG0012119	GO:0005102,GO:0005654,GO:0005730	1143
TraesCS5A02G098300	0.0049553	0.0105351	0.0338667	0	0	0	OG0000239	GO:0003677,GO:0005730
TraesCS7D02G517700	0.0179934	0	0.0227617	0.0276188	0	0.028019	OG0000822	GO:0003676
TraesCS5B02G351100	0.0725532	0.0590005	0.0878465	0.0761548	0.073829	0.157095	OG0006438	GO:0005198
TraesCSU02G144263	0	0	0	0	0	0	OG0000314	GO:0000166,GO:0005576,GO:0005739,GO:0005783
TraesCS6D02G341900	0	0.014067	0	0	0	0	OG0000238	GO:0005634,GO:0005737
TraesCS2A02G551600	0.958692	1.29705	0.880175	2.90222	1.09819	6.62244	OG0018334	GO:0000166,GO:0003677,GO:0005622	51
TraesCS5B02G440100	0.152995	0.26749	0.119601	0.22494	0.0915266	0.458763	OG0003655	GO:0003677	17666
TraesCS6A02G376900	0	0	0	0	0	0	OG0001872
TraesCS4D02G220100	0.0316598	0.014741	0	0.0173587	0.0144657	0.0176771	OG0015257
TraesCS1A02G287600	3.14684	2.40135	2.4067	3.67759	2.25929	3.29004	OG0002878	GO:0003677,GO:0005634	3745
TraesCS6B02G156300	0	0	0	0	0	0	OG0000097	GO:0005488,GO:0005773
TraesCS6B02G003100	0	0	0	0	0	0	OG0003099
TraesCS7A02G521100	0	0	0	0	0	0	OG0024162
TraesCS7D02G527100	0	0	0	0	0	0	OG0028629
TraesCS2B02G384100	0	0	0	0	0	0	OG0003914	GO:0005634
TraesCS1D02G183500	0	0	0	0	0	0	OG0056756
TraesCS7A02G063000	0	0	0	0	0	0	OG0000958	GO:0005773
TraesCS5D02G442300	7.76031	7.57301	7.47838	10.6173	7.8386	8.54753	OG0005255	GO:0005634	18907
TraesCS6B02G430400	0.29593	0.0955336	0.0892075	0.138528	0.0782408	0	OG0049657
TraesCS2A02G055100	0	0.0695373	0	0.332926	0.178903	0.21813	OG0058427
TraesCS5D02G098800	5.33243	4.71428	3.47362	3.16467	2.74066	1.33963	OG0052835	GO:0005622,GO:0005634,GO:0005737	1
TraesCS5D02G284100	0.128996	0.0422608	0.0215118	0.0971695	0.104199	0.0345204	OG0000864	GO:0005515
TraesCS4A02G314100	0	0	0	0.13401	0	0.216121	OG0028562
TraesCS3D02G191400	0	0.0153126	0	0.0374763	0	0.0392869	OG0000895	GO:0003682,GO:0003700,GO:0005634
TraesCS1D02G170100	0	0	0	0	0	0	OG0023007
TraesCS6D02G194300	1.42759	1.02754	1.33679	1.61855	1.00415	1.23233	OG0003017	GO:0005730	21361
TraesCS3B02G117500	0	0	0	0	0	0	OG0003734	GO:0005198,GO:0005618
TraesCS7D02G183400	0	0	0	0	0	0	OG0003379	GO:0005634
TraesCS5D02G493900	0	0	0	0	0	0	OG0000354	GO:0005622
TraesCS4D02G068200	3.20536	3.1231	2.48395	4.46204	2.29221	4.04071	OG0002021	GO:0003700	1716
TraesCS6A02G384600	0	0	0	0	0	0.0364993	OG0058469
TraesCS7A02G069100	0	0	0	0	0	0	OG0029365
TraesCS3B02G163900	0	0.107911	0.0782116	0.577575	0.310387	5.29109	OG0016001		0
TraesCS6A02G183700	1.95895	1.8684	1.77557	2.9226	2.04061	2.9772	OG0000433	GO:0005622,GO:0005730,GO:0005739	19507
TraesCS7A02G128300	0.0897346	0.101409	0.0131761	0.0106584	0.00818636	0.0248095	OG0010330	GO:0003682,GO:0003700,GO:0003723
TraesCS7B02G405200	0	0	0	0	0	0	OG0013293	GO:0005488
TraesCS1A02G071657	0	0	0	0	0	0	OG0045991
TraesCS3A02G243000	0.68487	0.54092	0.906063	0.407469	0.869216	0.356665	OG0004434		10002
TraesCS3D02G148000	14.2713	16.4289	18.3454	17.2794	10.0571	25.7211	OG0003604	GO:0003824,GO:0005773	1272
TraesCS1D02G151700	0.158399	0.11431	0.088902	0.117819	0.114437	0.0694575	OG0000059	GO:0005634
TraesCS2A02G371700	0.0207028	0.0414263	0	0.267961	0.131509	1.4868	OG0051008	GO:0005739	13
TraesCS7D02G359300	0.14511	0.111282	0	0.0793487	0.0444933	0.0542491	OG0010949	GO:0005618
TraesCS7B02G309000	0	0	0	0	0	0	OG0000000
TraesCS2B02G192500	0	0	0	0	0	0	OG0024875	GO:0003676
TraesCS4A02G200900	0	0	0	0	0	0	OG0024373	GO:0003676,GO:0005634
TraesCS4D02G001500	0.369559	0.42147	0.269276	1.11012	0.412209	3.89239	OG0015636		0
TraesCS4A02G205000	0	0	0	0	0	0	OG0013650	GO:0005488,GO:0005634
TraesCSU02G255529	0	0	0	0	0	0	OG0052240
TraesCS4B02G340200	0	0	0	0	0	0	OG0027718	GO:0005576
TraesCS3A02G471500	0	0	0	0	0	0	OG0002949	GO:0005768,GO:0005783,GO:0005794
TraesCS3A02G307400	0	0	0	0	0	0	OG0002429	GO:0003824
TraesCS1B02G416300	0	0	0	0	0	0	OG0007514	GO:0005488
TraesCS3D02G403900	0.229707	0.3019	0.0823803	0.575691	0.269694	1.18034	OG0003672		3
TraesCS6A02G409300	1.62931	1.6162	1.56278	1.87294	1.17426	3.38313	OG0019843		19975
TraesCS3D02G212500	0	0	0	0	0	0	OG0016166	GO:0005737
TraesCS3A02G320600	0	0	0	0	0.0362787	0	OG0002929
TraesCS2A02G389000	28.2834	21.4494	16.1391	35.4783	10.4243	32.5167	OG0002936	GO:0003723,GO:0005730,GO:0005737	488
TraesCS3B02G587300	0	0	0	0	0	0	OG0015676
TraesCS2A02G083200	0	0	0	0	0	0	OG0000058
TraesCS6A02G405500	1.3077	1.09161	1.25255	1.58926	1.38446	1.57733	OG0012729	GO:0003677,GO:0005634	19966
TraesCS7B02G433800	95.8111	114.389	42.4157	62.8024	20.2486	18.0451	OG0001177	GO:0005739,GO:0005794	17
TraesCS7D02G371900	23.9973	22.3945	28.1378	36.8239	34.3727	34.2489	OG0007270		1096
TraesCS7A02G563400	0	0	0	0	0	0	OG0056665
TraesCS6D02G144500	0.776092	0.188076	1.50125	0.385319	1.2441	0.391307	OG0019504		102
TraesCS1D02G030200	0	0.00151099	0.00256926	0.00232787	0.00368812	0.00157994	OG0058528
TraesCS5A02G439400	0.41032	0.363397	0.405228	0.532679	0.348075	0.443086	OG0020094		16463
TraesCS6B02G295000	0.139848	0.0569055	0.0467287	0.182751	0.0235676	0.0999819	OG0000589	GO:0005773,GO:0005794
TraesCS5D02G103100	0.497657	0.601802	0.47984	0.981739	0.380283	2.19393	OG0021339	GO:0005488	348
TraesCS3D02G420100	0	0	0.0793617	0	0	0	OG0007591
TraesCS7D02G105100	0.502467	0.352435	0.261913	0.728556	0.135659	0.687657	OG0010519	GO:0005737	24081
TraesCS7A02G467900	0	0	0	0	0	0	OG0024197
TraesCS1B02G028400	0	0	0	0	0	0	OG0028037	GO:0005488
TraesCS5B02G186100	22.4639	23.1259	22.4969	36.4282	26.5046	51.4857	OG0050506		4
TraesCS4D02G283500	0	0	0	0	0	0	OG0010240	GO:0005634
TraesCS3B02G128400	7.98232	4.27708	20.2584	8.25427	30.7463	11.7776	OG0005647	GO:0005777	7
TraesCS3B02G125000	0	0	0	0	0	0	OG0015943	GO:0003677
TraesCS7A02G275200	0	0	0	0	0	0	OG0028439
TraesCS5A02G496200	1.50668	1.78596	1.58631	2.38295	1.80338	2.88353	OG0010765	GO:0005739	16578
TraesCS3D02G175900	0.462421	0.16479	0.213217	0.391406	0.615521	0.726716	OG0013787	GO:0000166,GO:0003677,GO:0005576	12068
TraesCS5D02G113300	0	0	0	0	0	0	OG0008691	GO:0003682,GO:0003700,GO:0003824,GO:0005654,GO:0005737
TraesCS2B02G128400	1.12416	0.825687	0.645017	1.25089	0.777582	0.778968	OG0003328		7290
TraesCS6B02G213700	4.39099	4.0647	5.61869	6.5223	8.81892	11.4233	OG0001628	GO:0005215,GO:0005634	0
TraesCS6B02G322700	0.109785	0.135467	0.0663175	0.218647	0.0146165	0.444024	OG0022135	GO:0003676,GO:0003700,GO:0005634	20659
TraesCS7D02G395500	0	0	0	0	0	0	OG0001297
TraesCS1A02G255400	3.30916	2.16114	7.0178	4.9134	11.4585	9.24539	OG0005640	GO:0005488	7
TraesCS4B02G004000	0.000489575	0	0	0	0	0.00197364	OG0000259
TraesCS2D02G354800	22.567	23.5546	20.0538	31.439	21.02	43.6553	OG0005056	GO:0000166,GO:0005198,GO:0005618,GO:0005730	3
TraesCS3D02G008500	2.03853	2.09778	1.7786	3.78672	1.65634	5.26546	OG0015530	GO:0005783	20
TraesCS3B02G508200	0	0	0	0	0	0	OG0001937
TraesCS3A02G533600	1.25131	0.41024	0.184701	0.286501	0.109744	0.263973	OG0002258		291
TraesCS7A02G487900	1.36019	1.23851	1.39297	1.87098	1.23734	2.60054	OG0010734	GO:0005730,GO:0005737	22813
TraesCS1D02G198800	1.24364	1.16586	0.988228	1.34511	1.02874	1.34678	OG0003257	GO:0003723	5431
TraesCS4B02G040400	0	0	0	0	0	0	OG0028201
TraesCS6D02G207700	0.32502	0.319328	0.236281	0.346625	0.379717	0.294804	OG0022207	GO:0005622,GO:0005634
TraesCS6A02G319400	2.78796	1.96791	2.13053	3.63326	2.34318	4.27536	OG0013146	GO:0003676	1056
TraesCS7B02G066500	0	0	0	0	0	0	OG0004382	GO:0005576
TraesCS4B02G113400	3.17519	2.96853	2.04987	5.2348	2.27319	5.95555	OG0001980	GO:0003700,GO:0005634	442
TraesCS7B02G227900	0	0	0	0	0	0	OG0018846
TraesCS4D02G303300	0.0653575	0.069476	0.165355	0.103556	0.328111	5.00215	OG0051040
TraesCS2D02G334800	0.130369	0.378592	0.188664	0.383364	0.274687	0.546855	OG0028979	GO:0003677,GO:0005634	8990
TraesCS4A02G485900	0.417413	0.212269	1.3448	5.58119	4.46249	62.9974	OG0055278	GO:0005773	0
TraesCS5B02G166000	0.998159	0.768766	1.02127	0.942759	1.15984	2.5545	OG0006283	GO:0005634,GO:0005773	17097
TraesCS3D02G150700	0	0	0	0	0	0	OG0016289	GO:0005773
TraesCS6D02G207800	0.31302	0.16908	0.0636737	1.45109	0.264643	3.80967	OG0050290		0
TraesCS5B02G547300	0.809107	1.21589	0.603511	0.832189	0.855166	1.09294	OG0000256		17869
TraesCS3B02G302400	1.24756	1.48512	1.12226	1.27469	1.58734	1.20373	OG0011298	GO:0005488	11176
TraesCS2A02G045800	0	0	0	0	0	0	OG0045345	GO:0005576
TraesCS5D02G013500	0	0.00639373	0.0124717	0.0262071	0.0261887	0	OG0024264
TraesCS5B02G241700	0	0	0	0	0	0	OG0044462
TraesCS1B02G124400	0	0	0	0	0	0	OG0006327	GO:0003677,GO:0003700,GO:0005634
TraesCS1A02G028500	0.480749	0.474416	0.249889	0.934309	0.399413	0.802435	OG0000801		3174
TraesCS1A02G398000	0	0	0	0	0	0	OG0000313	GO:0004518
TraesCS5B02G414900	20.8952	17.6405	19.5207	25.4566	22.1468	53.8395	OG0003432	GO:0005618	0
TraesCS4A02G452400	0.864775	1.10585	0.756746	1.47076	1.0302	1.12851	OG0050377		13774
TraesCS2A02G425400	0.487478	0.394014	0.571603	0.708409	0.714577	0.575586	OG0000587		6810
TraesCS1D02G249900	6.737	6.40659	6.2897	8.9029	6.72339	10.5569	OG0011470		5557
TraesCS4A02G164800	1.39717	1.59014	1.39336	1.43056	1.66788	2.23086	OG0014019	GO:0004518,GO:0005730	13219
TraesCS6B02G464200	0	0	0	0	0	0	OG0020741	GO:0005622,GO:0005634,GO:0005737
TraesCS5A02G350800	0	0	0	0	0	0	OG0004904	GO:0005515
TraesCS5D02G327300	4.99216	4.73394	4.52719	5.02471	5.21688	6.63894	OG0004856		18680
TraesCS6D02G190100	10.7194	11.8599	10.7477	16.2272	11.68	33.2929	OG0003738	GO:0005198,GO:0005730,GO:0005783	3
TraesCS7B02G209400	0.0716745	0.107122	0.177876	0.24737	0.0830474	0.290933	OG0008190	GO:0003723,GO:0004518,GO:0005634,GO:0005739	23391
TraesCS6B02G331400	3.72164	2.55152	3.87063	5.47746	3.31324	6.79904	OG0012770	GO:0005488	20681
TraesCS5B02G533000	2.76689	2.5348	2.06937	3.95205	2.10197	4.2204	OG0048708	GO:0005622,GO:0005730,GO:0005777	17840
TraesCS2B02G487700	0.0201446	0	0	0	0	0	OG0005054	GO:0003677
TraesCS3B02G014000	0.274172	0.295974	0.518166	1.46536	0.627052	0	OG0020896		10611
TraesCS3B02G450300	0.561804	0.303393	0.295677	0.647104	0.351362	0.896722	OG0015669	GO:0003676,GO:0005730	11505
TraesCS5B02G130200	0.0156527	0.016639	0	0	0	0	OG0018015	GO:0005768
TraesCS7D02G215300	1.60199	1.81741	0.636729	1.72586	0.122461	1.14973	OG0020227	GO:0003677,GO:0005634	1819
TraesCS6A02G259500	1.2298	1.71168	1.16079	2.19004	1.46303	3.53542	OG0008212		19693
TraesCS5A02G220100	0	0	0	0	0	0	OG0013928
TraesCS4D02G329500	48.0542	98.8859	143.069	89.7112	63.279	33.9373	OG0028993	GO:0005576,GO:0005737	15438
TraesCS7A02G177500	0	0	0	0	0	0.108935	OG0000364	GO:0003677,GO:0003700,GO:0005634,GO:0005739
TraesCS5A02G326300	3.59886	3.21744	6.98147	3.025	11.716	6.82752	OG0050045		2
TraesCS6A02G109000	2.27431	2.0501	2.46711	4.62237	2.6201	8.65984	OG0012351		0
TraesCS1A02G316200	0	0	0	0	0	0	OG0000121
TraesCS2D02G091400	0.774941	0.116633	0.903611	0.639366	0.860807	2.81736	OG0044694	GO:0005618	78
TraesCS1D02G212800	2.18007	2.56462	2.03102	3.57046	2.41979	2.99327	OG0002832	GO:0003700,GO:0003824,GO:0005634	5466
TraesCS1A02G098700	0	0	0	0	0	0	OG0000941	GO:0005739
TraesCS4D02G086200	0	0	0	0.541261	0	0.447419	OG0013776	GO:0005783
TraesCS2A02G110600	0.297237	0.24934	0.229302	0.467423	0.199528	0.810097	OG0011002	GO:0003824,GO:0005634	693
TraesCS2A02G079300	3.55573	3.22146	1.75314	3.23445	2.0022	1.99096	OG0014472	GO:0005622	17
TraesCS1D02G112600	0	0	0	0	0	0	OG0008642
TraesCS5D02G322800	1.33532	1.32568	1.39642	2.06311	1.56236	3.44539	OG0004068	GO:0005622	0
TraesCS7D02G186200	0.814417	1.02329	0.691972	1.13711	0.712518	1.43159	OG0002756	GO:0005634,GO:0005739	24216
TraesCS1B02G127900	0.630087	0.505528	0.302023	1.6573	0.52717	2.58585	OG0004640	GO:0005773	3
TraesCS2A02G551900	0.997137	0.875334	0.806254	1.61943	0.916065	2.65847	OG0014409	GO:0000166	7029
TraesCS2A02G404300	0	0	0	0	0	0	OG0000000
TraesCS2D02G574300	0.0132426	0.0113524	0.00453949	0.00977658	0.0139509	0.0319851	OG0004814
TraesCS5D02G507300	0.79623	0.61814	1.10799	1.40296	2.13621	11.6232	OG0009748	GO:0005618,GO:0005777	0
TraesCS1D02G361900	7.15777	8.27247	7.78409	10.0327	9.08573	19.729	OG0019398	GO:0005618,GO:0005730,GO:0005773	0
TraesCS7A02G226500	0	0.0143015	0	0.00933385	0.0677718	0	OG0001279
TraesCS3A02G010300	1.164	0.983655	0.588239	1.78532	1.87918	1.47654	OG0000981	GO:0005783	9503
TraesCS3D02G025400	0.232167	0.220604	0.152497	0.290396	0.259973	0.315752	OG0058523	GO:0000166,GO:0004518,GO:0005634	11765
TraesCS3B02G080400	1.11047	1.83724	1.20495	2.50846	1.59484	2.64675	OG0058389	GO:0005576,GO:0005618,GO:0005739	10681
TraesCS2A02G484300	0	0	0	0	0	0	OG0002425	GO:0005488
TraesCS2B02G048400	7.64485	2.52734	7.00568	0.46911	16.2605	0.361727	OG0050677	GO:0005634,GO:0005783	2
TraesCS3A02G208600	0.0404473	0.0227529	0.0224907	0.0642268	0.0215296	0.279588	OG0000598	GO:0000003,GO:0005773
TraesCS5D02G486600	2.3245	2.0846	3.9339	2.57093	5.88893	4.00748	OG0009874	GO:0003677,GO:0003700,GO:0003723,GO:0004518,GO:0005634	2
TraesCS5B02G183400	2.47458	1.72592	1.78677	3.25715	2.2702	3.91673	OG0013959		17147
TraesCS7B02G031900	2.8268	2.36734	2.35345	2.79938	2.74238	2.12163	OG0054686		445
TraesCS7A02G476000	2.07404	3.06938	2.93661	3.49312	2.44071	2.31182	OG0054952	GO:0003677	22786
TraesCS1B02G181000	1.84773	1.69832	1.56835	2.34299	1.99035	2.79371	OG0047745	GO:0003723,GO:0003824	4389
TraesCS1B02G475700	2.04132	1.45185	1.82978	1.33944	2.37758	0.507015	OG0015716	GO:0005634,GO:0005737	406
TraesCS2A02G147700	0	0	0	0	0	0	OG0010260	GO:0005576
TraesCS7A02G375600	0.235447	0.277635	0.239339	0.565642	0.24902	1.09126	OG0002357	GO:0005739,GO:0005777	144
TraesCS1A02G070900	0.229685	0.127508	0.302725	0.13099	0.184757	0.447666	OG0004307	GO:0000166
TraesCS7B02G269200	0	0	0	0	0	0.0583521	OG0021859	GO:0000166,GO:0003676
TraesCS1D02G400600	15.6931	13.7568	13.0592	21.4113	9.18748	13.5789	OG0001049	GO:0005622,GO:0005634	612
TraesCS1A02G013200	0	0	0	0	0	0	OG0029269	GO:0003677,GO:0003700
TraesCS2A02G026200	0.0256738	0.0203706	0.0290571	0.0292636	0.1177	0.0211719	OG0013312
TraesCS1B02G003600	0.00620355	0	0.00367184	0.00225191	0.00313691	0.00585073	OG0027933	GO:0005634
TraesCS4B02G087800	4.80354	5.87982	6.39374	9.86586	5.34678	8.91481	OG0001606	GO:0005634,GO:0005777	14035
TraesCS4A02G159200	0.811868	0.894132	0.970238	1.13867	0.972127	1.4903	OG0010138	GO:0005634,GO:0005737	13202
TraesCS3B02G571000	1.45142	1.13817	1.05292	1.99619	1.18766	1.81247	OG0012972	GO:0005783,GO:0005794	11668
TraesCS6A02G203600	0.952593	0.691102	0.875749	1.15864	0.895563	2.92989	OG0049333	GO:0005739	0
TraesCS5A02G165700	7621.47	8585.66	3358.49	2653.85	2308.97	227.209	OG0000123	GO:0005618	1
TraesCS1B02G373900	3.85964	4.21579	4.5225	6.05765	3.84465	5.36993	OG0019259		4833
TraesCS1A02G124400	6.76264	6.15377	4.5683	4.17205	5.48854	1.56315	OG0011185		1
TraesCS3A02G295900	1.51508	1.17664	0.908114	1.61521	1.28616	1.92919	OG0000848	GO:0005654	10136
TraesCS5A02G320500	0.0965898	0.0290524	0.0309425	0	0	0	OG0004044	GO:0003682,GO:0003700,GO:0005634
TraesCS4D02G159900	2.22342	1.98299	2.26798	2.70099	2.53043	3.13452	OG0010902	GO:0003677	15063
TraesCS6D02G297900	1.58524	1.30108	3.58305	1.40344	6.31018	0.412581	OG0006484		2
TraesCS7A02G253300	0.170207	0.0553977	0.111638	0.437868	0.275691	0.861609	OG0016635		31
TraesCS3D02G508200	0	0	0	0	0	0	OG0003582
TraesCS2A02G313100	0	0	0	0.0875776	0	0	OG0014287	GO:0000003,GO:0005488
TraesCS3A02G345600	0	0	0	0	0	0	OG0001505
TraesCS7A02G522300	0	0	0	0	0	0	OG0013871
TraesCS4B02G020700	0	0	0	0	0	0	OG0017531	GO:0005634
TraesCS1A02G322700	1.80249	2.26669	2.18356	2.51517	1.20767	0.794414	OG0001843		22
TraesCS3A02G478000	0	0	0	0	0	0	OG0008492	GO:0005488
TraesCS7B02G056600	2.71503	2.78456	3.18066	4.32523	2.67631	3.716	OG0002221	GO:0000166,GO:0003676,GO:0005730	23043
TraesCS5A02G201900	2.81999	3.31226	0.634248	3.98489	1.98579	3.73802	OG0013923	GO:0003677,GO:0005634	15998
TraesCS6D02G387300	5.37727	6.69814	3.79207	2.4412	4.67414	0.805757	OG0010676	GO:0005488	1
TraesCS6A02G097300	0	0	0	0	0	0	OG0006253
TraesCS6B02G266000	0.130806	0.0845241	0.111801	0.218692	0.129771	0.307743	OG0004127	GO:0005576,GO:0005768
TraesCS2B02G157000	0	0	0	0.0107968	0	0	OG0001441	GO:0005488,GO:0005576,GO:0005773
TraesCS4D02G062300	0	0.00717416	0	0	0	0	OG0020605	GO:0000166
TraesCS6B02G321200	7.24487	6.77266	5.01467	9.01925	5.71282	14.0431	OG0002696	GO:0005794	3
TraesCS3B02G193100	0	0	0	0	0	0	OG0020873
TraesCS5B02G427800	0.0927994	0.0556889	0.219996	0.619667	0.359792	1.80537	OG0010095	GO:0003677,GO:0005622	0
TraesCS7A02G186600	0	0	0	0	0	0	OG0006057	GO:0005773
TraesCS2A02G015200	0	0	0	0	0	0	OG0001918
TraesCS1A02G066000	0.038166	0.108462	0.021034	0.0416701	0.0714986	0.22624	OG0005455	GO:0005488,GO:0005634,GO:0005739
TraesCS7B02G309200	0.830408	0.411062	0.711535	0.544824	1.29473	1.5713	OG0058939	GO:0005576,GO:0005654	23640
TraesCS3D02G160300	0	0	0	0.00423986	0	0.104589	OG0000707	GO:0005794
TraesCS5B02G215300	3.94062	2.92747	2.72417	8.78223	3.2516	12.8618	OG0014031		4
TraesCS6B02G357200	0	0	0	0	0	0	OG0004760
TraesCS3A02G107200	8.33323	7.29011	8.44613	13.838	2.58636	10.0195	OG0004509	GO:0005634,GO:0005737	752
TraesCS7D02G541400	0	0	0	0	0	0	OG0028536
TraesCS4D02G183700	5.36306	4.83339	11.5759	3.62529	16.4931	3.62305	OG0009930	GO:0003723,GO:0005773	2
TraesCS4A02G185300	0	0	0	0	0	0	OG0013880
TraesCS1B02G252500	0	0	0	0	0	0	OG0044545	GO:0005634,GO:0005737
TraesCS5B02G296700	0.0344439	0.0531289	0	0	0.0406322	0.064128	OG0003019	GO:0005794
TraesCS1B02G046300	10.4209	8.77783	16.0336	12.6292	28.4319	11.852	OG0011605	GO:0005634	2
TraesCSU02G268600	0	0	0	0	0	0	OG0001920	GO:0003677,GO:0003700,GO:0005634
TraesCS3D02G131700	0	0	0	0	0	0	OG0003350
TraesCS4B02G084100	0	0	0	0	0	0	OG0013863
TraesCS6B02G224100	9.41732	9.24373	8.97886	10.6026	11.4372	8.46454	OG0057708	GO:0005773	1
TraesCS6A02G134100	0	0	0	0	0	0	OG0055101
TraesCS1D02G203300	0.0107708	0.0178601	0	0.0282465	0.00521605	0.0174239	OG0005910	GO:0003676,GO:0003700,GO:0005634,GO:0005737
TraesCS6D02G184300	0.806429	0.562848	0.453664	0.89735	0.483856	1.14565	OG0016762	GO:0005488	21325
TraesCS2D02G226100	6.09286	5.00438	4.61194	7.6096	5.96258	14.7494	OG0001753	GO:0005198	5
TraesCS6A02G258300	2.0204	1.72256	1.48374	2.87202	1.94245	4.49618	OG0019812	GO:0005773	3031
TraesCS5D02G390900	0	0	0	0	0	0	OG0029319
TraesCS7A02G350000	2.13195	1.9103	1.97661	2.27406	1.74121	2.76339	OG0010972	GO:0005634,GO:0005737	22541
TraesCS4A02G360200	0.0230336	0.0423187	0.0200637	0.025617	0.0224918	0.087523	OG0010503	GO:0003723,GO:0004518,GO:0005739
TraesCS6D02G143900	0	0	0	0	0	0	OG0023069
TraesCS6B02G286900	0.0381828	0.0405889	0	0.149995	0.138795	0.0594578	OG0016856	GO:0003677,GO:0005634
TraesCS5D02G478200	0.0613786	0.145856	0	0.213163	0	1.82618	OG0007930
TraesCS1A02G406200	0.661631	0.820151	0.434394	1.37457	0.551244	2.82131	OG0000540	GO:0005783	3
TraesCS5B02G499200	2.84881	2.82531	3.73668	3.85669	3.65878	3.47766	OG0003592	GO:0000166,GO:0005654,GO:0005730	17775
TraesCS1D02G216500	0	0.00803799	0	0	0.0186463	0	OG0016804	GO:0003723
TraesCS7D02G215600	0	0	0	0	0.00747229	0	OG0008895	GO:0005654
TraesCS5A02G373400	0.373531	0.423046	0.374684	0.674265	0.610018	2.37287	OG0007224	GO:0005576	0
TraesCS3B02G341500	0.697397	0.691659	0.45793	0.586116	0.390618	0.816449	OG0000250		11270
TraesCS3B02G395100	0.706448	0.560391	0.553159	1.21432	0.794619	3.37183	OG0005612	GO:0005768,GO:0005773,GO:0005794	0
TraesCS1B02G375100	0.66345	0.649391	0.774159	1.57253	0.583375	2.27411	OG0016057	GO:0005634,GO:0005737	6
TraesCS3A02G476200	0	0	0	0	0	0	OG0048736	GO:0005488,GO:0005576,GO:0005764,GO:0005773,GO:0005783
TraesCS1D02G074700	0	0	0	0	0	0	OG0001462	GO:0005576
TraesCS6A02G277300	0.57668	0.438055	0.814232	0.862107	1.37383	1.61094	OG0010883	GO:0005737	914
TraesCS6D02G127300	0.0771821	0.320461	0.503107	0.178349	0.277149	0.20909	OG0004193	GO:0005488	21178
TraesCS1B02G390600	0	0	0	0	0	0	OG0017466	GO:0005488
TraesCS3D02G435800	0	0.00420762	0	0	0	0	OG0015563
TraesCS7B02G222600	0.355237	0.337436	0.452106	0.489439	0.345985	0.699975	OG0012352	GO:0003677,GO:0005654,GO:0005737	23430
TraesCS3A02G383600	1.8337	1.55204	2.76534	2.25603	2.97477	3.65603	OG0007818	GO:0005768	10350
TraesCS2D02G000600	4.14511	3.53934	4.05534	4.69223	4.45881	3.54306	OG0002511	GO:0005634	1505
TraesCS5D02G165600	0.542667	0.129118	0.8219	0.270415	1.60037	0	OG0017856	GO:0005488	64
TraesCSU02G026800	0.185231	0.233713	1.91391	0.342245	3.23298	0.175696	OG0017187	GO:0005488,GO:0005794	2
TraesCS2A02G334200	0.0367476	0.0657814	0.0267553	0.140723	0.0226544	0.152458	OG0053932	GO:0005737
TraesCS1D02G353800	6.25983	6.39436	8.06705	6.58362	7.9341	4.68686	OG0015648	GO:0005634	1
TraesCS4D02G024600	0	0	0	0	0	0	OG0013355
TraesCS5D02G202700	10.6029	10.9838	9.25625	8.91408	7.34393	6.30123	OG0013743	GO:0005773,GO:0005783	440
TraesCS5B02G081600	0.291046	0.12344	0.0692403	0.373	0.22844	1.52379	OG0023882		0
TraesCS7D02G237100	2.63993	2.5198	2.37051	3.92197	3.09999	3.00139	OG0009108	GO:0005737	24321
TraesCS7D02G024400	1.34081	1.31005	1.17092	1.74833	1.15601	2.57287	OG0049521		23960
TraesCS3B02G472100	0	0	0	0	0	0	OG0020965
TraesCS5D02G345600	0	0	0	0	0	0	OG0000047	GO:0005198
TraesCS5A02G524400	62.9479	68.4998	66.9686	56.7967	78.7757	11.7871	OG0052708	GO:0005739	1
TraesCS5D02G563800	4.66451	4.41777	4.17017	3.02966	3.55858	3.11363	OG0007018		586
TraesCS7A02G483800	0.503902	0.555502	0.496657	0.707726	0.421595	0.710459	OG0009929	GO:0003723	22805
TraesCS7B02G028400	0	0	0	0	0	0	OG0003375	GO:0003676,GO:0005634
TraesCS2D02G117000	0	0	0	0	0	0	OG0005381	GO:0005634,GO:0005737
TraesCS6B02G377800	0	0	0	0.13078	0	0.238512	OG0008116	GO:0005488,GO:0005576
TraesCS3B02G432700	1.63901	1.25507	1.48376	1.9458	3.94289	3.72984	OG0019056		11475
TraesCS1B02G378700	0.0648019	0.029713	0	0.0464371	0	0	OG0054064	GO:0003677,GO:0005634
TraesCS2A02G250400	0	0	0	0	0	0	OG0000041	GO:0003676
TraesCS6B02G330300	0.682926	0.588614	0.518672	0.911634	0.781767	1.12248	OG0051580		20675
TraesCS6D02G251100	3.035	2.59921	2.57244	4.8598	2.65315	7.34757	OG0016685		4
TraesCS6B02G136000	0	0	0	0	0	0	OG0046363	GO:0005634
TraesCS2A02G425500	0.278056	0.207596	0.476794	1.44981	2.42155	7.86435	OG0009707		0
TraesCSU02G253700	0	0	0	0	0	0	OG0013355
TraesCS2D02G334200	0.0346578	0	0.149182	0.163604	0.177053	0.327497	OG0021542	GO:0003677,GO:0005634
TraesCS2A02G219800	0	0	0	0	0	0	OG0014785	GO:0005488
TraesCS5D02G136500	0.00829974	0	0	0.0260288	0	0.472514	OG0024334	GO:0005576
TraesCS7A02G108100	0	0	0	0	0	0	OG0020594	GO:0005773
TraesCS1A02G262900	0	0	0	0	0	0	OG0002305	GO:0005618
TraesCS6D02G136600	0.763786	0.512184	1.15365	1.65175	2.91054	9.36788	OG0022322		0
TraesCS1A02G192200	6.08969	5.69881	6.59116	6.89448	5.67248	5.09179	OG0014521	GO:0003824	27
TraesCS5B02G377200	0	0	0	0	0	0	OG0008093
TraesCS4A02G014400	0	0	0	0	0	0	OG0016580	GO:0005576,GO:0005773
TraesCS3B02G489800	0	0	0	0	0	0	OG0053945
TraesCS5B02G378500	0	0.0408217	0.027891	0.0148599	0.0206998	0	OG0001552	GO:0003677,GO:0005634,GO:0005794
TraesCS5B02G329100	0	0	0	0	0	0	OG0017067
TraesCS7A02G508800	0.104337	0.276701	0.233655	0.462206	0.420344	0.22417	OG0000454	GO:0003700,GO:0005634	22853
TraesCS5A02G062200	0	0	0	0	0	0	OG0004469	GO:0003677,GO:0005737
TraesCS5B02G018200	0	0	0	0	0	0	OG0017266
TraesCS3B02G388500	0	0	0	0	0	0	OG0015682
TraesCS1D02G163000	0.16495	0.184944	0	0	0	0.719856	OG0022259
TraesCS3B02G277300	0	0	0	0	0	0	OG0011824	GO:0003700
TraesCS5D02G164900	0	0	0	0	0	0	OG0000052	GO:0005634
TraesCS7A02G239000	0.425472	0.277246	0.488921	0.437044	0.697259	0.623898	OG0058563		22231
TraesCS2D02G063700	0	0	0	0	0	0	OG0002568
TraesCS1B02G434800	1.32252	0.200724	0.0485559	0.102031	1.37425	0	OG0000051	GO:0003677
TraesCS4B02G312900	0	0	0	0	0	0	OG0052453
TraesCS3A02G124400	0	0	0	0.0184505	0	0	OG0003606	GO:0005739
TraesCS3D02G338200	4.45529	5.23639	3.55756	7.39261	4.23284	8.37379	OG0056211	GO:0003723,GO:0005198,GO:0005618,GO:0005730	12475
TraesCS2D02G540900	0.044949	0.184816	0.392718	0.209234	0.0971541	0.139988	OG0023543
TraesCS1A02G024000	0	0	0	0	0	0	OG0003675	GO:0003676
TraesCS1A02G381900	0	0	0	0.0259252	0	0.0509579	OG0008543	GO:0003774
TraesCS7A02G460300	0	0	0	0	0	0	OG0000212	GO:0005737
TraesCS3D02G162000	0	0	0	0	0	0	OG0000000
TraesCS2B02G483000	0.040177	0.0825974	0.289947	0.251998	0.660366	0.972711	OG0000309		8081
TraesCS5B02G400300	0.699162	0.811043	0.76391	1.61941	1.31653	1.66616	OG0014912	GO:0005618,GO:0005654	2969
TraesCS6B02G030400	0.0382951	0.0183382	0.0396439	0.0967597	0.0111892	0.128148	OG0054447	GO:0003824
TraesCS3D02G349700	3.95197	4.96032	5.02203	5.7848	4.3075	4.84563	OG0048828	GO:0005634	12497
TraesCSU02G191400	0.0522715	0.14838	0.0818323	0.105672	0.172791	0.0253046	OG0003335	GO:0005634,GO:0005773
TraesCS1B02G184900	0	0	0	0	0	0	OG0020491	GO:0005488
TraesCS5D02G016200	1.60396	1.46023	1.39868	3.52154	2.04909	2.27595	OG0017478	GO:0003700,GO:0005737	17931
TraesCS4A02G368100	1.64924	1.02622	0.86272	0.81639	1.64767	1.46117	OG0002156		13646
TraesCS7D02G530000	0.264623	0.288946	0.273716	0.388533	0.16499	0.313175	OG0044288		24974
TraesCS6B02G049500	0.0835411	0.176576	0.123578	0.200385	0	0.106399	OG0052868	GO:0003677,GO:0005730
TraesCS4A02G213100	0.538077	0.519072	0.548651	0.893912	0.752557	1.48912	OG0009307	GO:0003677,GO:0005634	13331
TraesCSU02G048400	0	0	0	0	0	0	OG0000668
TraesCS3A02G455900	0	0	0	0	0.0297579	0	OG0008522
TraesCS7D02G217800	0	0	0.0354621	0.307851	0.124806	2.45922	OG0005199
TraesCS2B02G597200	0.149692	0.145629	0.0902921	0.122554	0	0.041145	OG0010542
TraesCS7A02G040600	0.604309	1.1453	0.911883	1.78397	1.13876	1.46007	OG0003124	GO:0005634	21901
TraesCS1B02G316400	2.39973	2.03731	2.53111	4.7374	3.5982	11.8082	OG0007483	GO:0005783	0
TraesCS6B02G013700	1.43153	1.10611	1.43174	2.12046	1.224	1.23642	OG0050663		20016
TraesCS2B02G266500	0	0	0	0	0	0	OG0015094	GO:0005773
TraesCS7D02G527500	0	0	0	0	0	0	OG0005395	GO:0003700,GO:0005634
TraesCS7A02G240700	1.47782	1.37091	1.47218	2.21546	1.49506	2.47865	OG0004622	GO:0005794	22234
TraesCS4D02G341000	0.0795597	0.0746921	0.0477212	0.152949	0.180874	1.02471	OG0010049	GO:0003700,GO:0005634	0
TraesCS4B02G229200	1.85913	1.62807	1.87694	3.12892	2.54827	6.60771	OG0007082	GO:0003676,GO:0005634	60
TraesCS4D02G103000	0.0714738	0.13419	0.115996	0.262599	0.182277	1.14444	OG0001989		13
TraesCS4B02G034800	0	0	0	0	0	0	OG0025121
TraesCS6B02G103500	0	0	0	0	0	0	OG0021087	GO:0005488
TraesCS1A02G021900	0	0	0	0	0	0	OG0028617	GO:0005634
TraesCS6D02G031000	0	0	0	0	0	0	OG0057912
TraesCS7D02G026900	0	0	0.0605972	0.0355462	0	0.0648276	OG0002142	GO:0003677,GO:0003682
TraesCS2B02G078500	0.763964	0.717188	0.67601	1.05435	0.697084	0.860029	OG0013175	GO:0005634	7196
TraesCS5A02G006000	0	0	0	0	0	0.010901	OG0003888	GO:0005783,GO:0005794
TraesCS1B02G031800	0	0	0	0	0	0	OG0023236
TraesCS4A02G315800	1.91413	1.7092	1.56027	2.12662	1.71313	1.6325	OG0003490		1
TraesCSU02G195000	0	0	0	0	0	0	OG0024395	GO:0005576
TraesCS1D02G006600	0	0	0	0	0	0	OG0049658
TraesCS6B02G280200	0.0152856	0	0	0.0242194	0	0.130424	OG0022130	GO:0000003
TraesCS2A02G032000	0	0	0	0	0	0	OG0000106	GO:0005515
TraesCS2D02G593700	0	0.00510059	0	0	0.010371	0	OG0023838	GO:0000166,GO:0003723,GO:0005737
TraesCS3A02G216900	0	0	0	0.0276612	0	0	OG0027292	GO:0005488
TraesCS2B02G141500	0	0	0	0	0	0	OG0001557
TraesCS3D02G484500	0.210798	0.152404	0.0490137	0.295991	0.149552	0.397295	OG0005675	GO:0003677,GO:0003677,GO:0003824,GO:0005634	12732
TraesCS2B02G366400	0.00606174	0.00348866	0.0123709	0.0136612	0.00708714	0.055295	OG0009410	GO:0005737
TraesCS1B02G477300	0.735793	1.08225	0.71633	1.23829	0.888786	1.52517	OG0020470		5002
TraesCS6B02G467400	0	0	0	0	0	0	OG0004739	GO:0003682,GO:0003700,GO:0005634
TraesCS6B02G466400	0	0.0131736	0	0.0340349	0	0.117601	OG0004635	GO:0003774
TraesCS3A02G468700	0	0	0.0135967	0	0	0	OG0000035
TraesCS3D02G384000	12.3963	12.9823	14.5169	25.7989	15.7259	49.6482	OG0044276	GO:0005618,GO:0005730,GO:0005739,GO:0005773	0
TraesCS2D02G254500	50.5037	50.7191	79.8229	38.2403	87.6598	11.3165	OG0004207		1
TraesCS1A02G416700	0	0	0	0.0797552	0	1.1327	OG0013488	GO:0005215
TraesCS5A02G000800	0	0	0	0	0	0	OG0017414
TraesCS2A02G566700	10.7796	12.5358	10.7325	15.7913	4.89173	10.6135	OG0000439	GO:0005634	2224
TraesCS5B02G212400	0	0	0	0	0	0	OG0014070	GO:0005488,GO:0005576
TraesCS5D02G569300	0	0	0	0	0	0	OG0023367	GO:0005739,GO:0005783
TraesCS6D02G187300	0.594207	0.504001	0.339163	0.602438	0.419133	0.450731	OG0012191	GO:0003700,GO:0005634	21337
TraesCS4A02G198800	0.0490735	0.0142612	0.0664698	0.105011	0.0398946	0.0821526	OG0004070
TraesCS7B02G449800	0	0	0	0.0409435	0	0	OG0056629	GO:0003677,GO:0005730
TraesCS2B02G519300	0	0.0480309	0	0	0	0	OG0017697	GO:0003723
TraesCS5D02G463800	0.0470647	0.0338551	0.0320013	0.091789	0.0366663	0	OG0013248	GO:0003774
TraesCSU02G096900	2.6461	2.15245	5.69151	9.17547	15.3436	6.75257	OG0000971	GO:0003824,GO:0005773	25132
TraesCS7B02G221400	0.752874	0.754768	0.620316	0.652855	0.993888	0.468841	OG0013125	GO:0005773,GO:0005794	2623
TraesCS2D02G010400	0.00692734	0.0166382	0	0.020012	0.0566993	0	OG0056423	GO:0005773
TraesCS7D02G516400	0.0678269	0.101467	0.0370569	0.157932	0.0875061	0.330043	OG0002993	GO:0005576
TraesCS4A02G270400	14.55	19.4224	13.7242	8.61144	21.8892	1.08165	OG0015099		1
TraesCS1B02G474500	4.7193	4.83152	4.15208	6.66785	4.07706	4.83675	OG0001281		4996
TraesCS5B02G080600	0	0	0	0.0843898	0	0	OG0017407	GO:0005488
TraesCS7A02G270200	4.02462	4.16051	2.14246	3.59164	1.65175	4.06153	OG0005041	GO:0005777	22308
TraesCS7D02G509800	0	0	0	0	0	0	OG0056190	GO:0005198,GO:0005618
TraesCS3B02G136700	0	0	0	0	0	0	OG0000024	GO:0005654
TraesCS7D02G364900	2.78345	2.86948	2.02945	8.58174	0.728835	30.9159	OG0004262	GO:0005737	195
TraesCS6D02G295100	0.0693106	0.0340271	0	0.0496681	0	0.0996911	OG0004671	GO:0003677
TraesCS7D02G085500	0	0.00221559	0	0	0	0	OG0000697	GO:0005515,GO:0005576,GO:0005737
TraesCS6D02G136200	0.65235	1.15624	1.69503	2.28546	2.34325	6.86161	OG0000454	GO:0003700,GO:0005634	1655
TraesCS3B02G564100	2.30761	1.80968	1.83554	2.60895	2.06896	2.06872	OG0047510	GO:0003677	1505
TraesCS1D02G413100	2.47296	1.71403	0.902846	0.244596	0.533153	0.142444	OG0000051	GO:0003677,GO:0003682	871
TraesCS7A02G065300	0	0	0	0	0	0	OG0026550
TraesCS3B02G490900	1.20859	1.19989	1.35522	2.03443	1.49285	2.38342	OG0058074	GO:0005634	11572
TraesCS3A02G437700	231.403	273.8	350.643	344.386	372.762	186.391	OG0007271		2184
TraesCS7D02G302900	0.117946	0.102386	0.099092	0.129872	0.130636	0.319554	OG0012448	GO:0005737	24501
TraesCS1A02G303300	2.63772	2.07027	1.60578	2.34972	1.27333	2.40805	OG0005662	GO:0005739	3778
TraesCS2D02G455400	0.0985104	0.0191907	0.0220024	0.160185	0.018797	0.233549	OG0018194	GO:0003723,GO:0004518,GO:0005794
TraesCS1B02G314300	0	0	0	0	0	0	OG0020946	GO:0005634
TraesCS3D02G504800	0	0	0	0	0	0	OG0020914	GO:0003677
TraesCS3B02G001300	0.0166112	0.00882898	0	0.0131599	0.017952	0	OG0054480	GO:0005737
TraesCS3B02G402300	0	0	0	0.0342168	0	0	OG0021050
TraesCSU02G269400	0	0.0661588	0	0	0	0	OG0020550	GO:0005488,GO:0005739
TraesCS2D02G265200	0	0	0	0	0	0	OG0021037	GO:0005488
TraesCS2A02G383000	0	0	0	0	0	0	OG0014344
TraesCS2D02G373400	2.64505	1.52926	2.47505	2.995	2.31417	1.58732	OG0054747	GO:0005622	2410
TraesCS1A02G326400	0	0	0	0	0	0	OG0017565	GO:0005488
TraesCS3A02G500300	0	0	0	0	0	0	OG0002411
TraesCS5B02G276400	0	0.00670592	0	0.00943056	0	0	OG0008818	GO:0003723,GO:0003824,GO:0005634
TraesCS1B02G069100	0.00843399	0.00896545	0	0.0130865	0.0415956	0.0262666	OG0008552	GO:0005737
TraesCS5A02G099500	0	0.0089913	0.0213996	0.0131243	0.0398871	0	OG0013655
TraesCS5D02G485400	3.18205	2.85899	2.79548	4.27387	2.54366	5.05986	OG0017041	GO:0005634	18989
TraesCS2A02G461800	0.0311824	0.0590845	0	0.0816836	0.0275859	0.154481	OG0004150
TraesCS6B02G240800	0	0	0	0	0	0	OG0000686	GO:0005739
TraesCS6B02G389800	0.036922	0	0	0	0	0.0531058	OG0005977
TraesCS2D02G180500	0.0292164	0	0	0.0417438	0.0463383	3.09846	OG0018917	GO:0005737
TraesCS1D02G128300	0	0	0	0	0	0	OG0000278	GO:0003676,GO:0005739
TraesCSU02G204400	0	0	0	0	0	0	OG0003367	GO:0005576,GO:0005618
TraesCS4A02G040900	0.983844	1.00456	1.10969	0.752488	0.874706	0.916068	OG0053701	GO:0005488,GO:0005794	12913
TraesCS6A02G103500	0	0	0	0	0	0	OG0004809	GO:0003676
TraesCS7D02G203100	0.35357	0.327043	0.360116	0.545311	0.381358	0.532693	OG0002775	GO:0005634	24253
TraesCS6D02G113100	0	0	0	0	0	0	OG0013413	GO:0005488
TraesCS3D02G202300	0.377094	0.320407	0.357448	0.321364	0.359866	0.149689	OG0022006	GO:0003677,GO:0005634
TraesCS4D02G009600	0	0	0	0	0	0	OG0017391
TraesCS4D02G190400	1.82443	1.50375	1.23627	2.15485	1.41365	2.33151	OG0007388	GO:0000166,GO:0003676,GO:0003824,GO:0005737	15137
TraesCS4A02G179700	5.02933	5.158	4.87071	7.65756	5.57491	6.05342	OG0013905		13258
TraesCS2B02G596100	0	0	0	0	0	0	OG0000080	GO:0005783,GO:0005794
TraesCS6D02G385000	0	0	0	0	0	0	OG0006050
TraesCS4B02G288800	0	0	0	0	0	0	OG0020554
TraesCS5B02G394600	0	0.0187251	0	0.0552428	0	0.387766	OG0001766
TraesCS6B02G116800	0.975129	1.09748	0.999581	1.32056	0.607728	1.67331	OG0008020		20193
TraesCS4A02G304300	0.887985	0.67567	0.949932	0.490208	1.23745	0.415053	OG0001348	GO:0005576,GO:0005618,GO:0005773	532
TraesCS1A02G425100	1.40952	1.09794	1.55407	1.59559	1.41745	3.52938	OG0015761	GO:0005634,GO:0005773	31
TraesCS2B02G593300	0	0	0	0	0	0	OG0000509
TraesCSU02G058000	0.4635	0.328876	0.239551	0.602876	0.343687	0.715646	OG0011809	GO:0003723,GO:0005730	25085
TraesCS6A02G027700	0.438595	0.357807	0.447457	0.45737	0.150584	0	OG0013471
TraesCS6A02G358200	2.26058	1.95414	2.22915	3.01816	2.34163	3.80426	OG0002364	GO:0003676	19887
TraesCS1A02G222800	1.57835	1.56679	1.32068	2.75897	1.90292	3.69435	OG0001944		1843
TraesCS2B02G516400	0	0	0	0	0	0	OG0020501
TraesCS4A02G230400	0	0	0	0	0	0	OG0052582	GO:0000003,GO:0005576,GO:0005618
TraesCS7A02G054900	3.22617	3.17408	2.90619	4.95067	2.62445	4.46308	OG0001042	GO:0003677,GO:0005634	21917
TraesCS1A02G400700	0.370881	0.640414	0.169016	0.722106	0.613874	1.6062	OG0002266	GO:0003676	319
TraesCS4D02G258600	0	0.0117935	0	0	0	0	OG0024144
TraesCS7B02G396800	0	0.0254249	0	0.0378967	0	0.567829	OG0002569	GO:0005488
TraesCS4A02G454800	2.72474	3.12047	4.99869	7.61752	12.7029	20.5635	OG0003087	GO:0005488	0
TraesCS2A02G453800	12.2846	8.07478	7.10658	16.0821	6.12019	10.0408	OG0000102	GO:0000166	6855
TraesCS5D02G559000	0	0	0	0	0	0	OG0046433	GO:0003700,GO:0005634
TraesCS6A02G121300	2.71958	2.09973	1.73607	6.91805	2.57009	47.0094	OG0005864	GO:0005794	0
TraesCS4D02G298900	0	0	0	0	0	0.0138476	OG0058929	GO:0005634,GO:0005773
TraesCS3D02G519500	0	0	0	0.0138587	0	0	OG0000458	GO:0003676
TraesCS5B02G174000	2.92313	2.87275	2.9648	1.90932	3.29236	1.37183	OG0009217		276
TraesCS5D02G522500	0.0294364	0.0296574	0.027084	0.0288598	0.0201008	0.0954165	OG0000687
TraesCS2A02G586900	0.976261	0.799219	0.687329	1.38958	0.803343	1.32408	OG0011721		7092
TraesCS7D02G173700	0	0	0	0	0	0	OG0052968
TraesCS2A02G345200	0.0251079	0.0429416	0.0270188	0.0385392	0.0309574	0.0506093	OG0001920	GO:0003677,GO:0003700,GO:0005634
TraesCS5B02G566600	0	0	0	0	0	0	OG0028953
TraesCS5A02G438800	0	0	0	0	0	0.0476998	OG0010829	GO:0005634
TraesCS2A02G389300	3.25369	3.10651	3.26936	4.72245	3.70831	6.49763	OG0009364		371
TraesCS2A02G212000	1.10491	1.03364	0.947187	1.81082	1.24795	2.74354	OG0010650	GO:0000166,GO:0003723,GO:0005739	0
TraesCS1B02G322700	0.983147	0.767926	1.25303	0.77739	1.37388	0.638706	OG0004864		2
TraesCS3D02G163500	0	0	0	0	0	0	OG0000313
TraesCS4D02G322900	0.470124	0.542704	0.322687	0.74448	0.31885	1.14345	OG0010720	GO:0003723,GO:0005739	15428
TraesCS4A02G191900	0	0	0	0	0	0	OG0013803
TraesCS5D02G174800	0	0	0	0	0	0	OG0046924	GO:0005739
TraesCS6D02G281300	0.0872744	0.0674139	0	0.036209	0.039743	0.429463	OG0017116	GO:0000003,GO:0003677,GO:0005737	1341
TraesCS2B02G479400	0.129552	0.118424	0.131678	0.189056	0.197967	0.103631	OG0003880
TraesCS3B02G167000	41.333	34.7028	29.7465	69.8391	31.4606	84.6896	OG0000629	GO:0003677,GO:0005634	4
TraesCSU02G111200	0.268547	0.128122	0.125379	0.15796	0.178575	0.0919201	OG0046171	GO:0003723,GO:0004518
TraesCS6B02G311600	0	0	0	0	0	0	OG0003799	GO:0005634,GO:0005737
TraesCS3B02G580600	0	0	0	0	0	0	OG0000057	GO:0005654,GO:0005737
TraesCS1B02G350700	4.35104	3.07609	2.96927	4.97175	2.46297	5.98879	OG0005683	GO:0005576,GO:0005618,GO:0005773	1295
TraesCS4D02G204600	1.64763	2.12679	1.49961	2.7742	1.13352	2.67339	OG0018466	GO:0005737	15170
TraesCS4D02G299800	5.03825	2.47172	1.2824	4.95425	1.37078	6.57152	OG0021827	GO:0000166,GO:0005634,GO:0005773,GO:0005783	1126
TraesCSU02G171900	0.298726	0.288604	0.246969	0.271307	0.354241	0.0589779	OG0050570	GO:0005515	1376
TraesCS2B02G395100	0.287291	0.212826	0.171982	0.77672	0.277968	1.89558	OG0014329		545
TraesCS4B02G359900	2.02919	2.25008	1.73536	1.1394	1.57229	0.79793	OG0010507	GO:0004518,GO:0005730,GO:0005739	1
TraesCS5A02G296200	1.05476	0.757385	0.948519	1.40691	1.09851	1.38792	OG0004939	GO:0005634,GO:0005783	16168
TraesCS2B02G536600	0	0.00962264	0	0.070526	0.137133	0.0980918	OG0013302
TraesCS5D02G151600	0.088356	0.673699	0.206663	0.871527	0.570078	0.164502	OG0006487	GO:0003676,GO:0003824	18279
TraesCS3A02G292300	0	0	0	0	0	0	OG0000064
TraesCS3B02G104800	0	0	0	0	0	0	OG0044735	GO:0000166,GO:0003676
TraesCS5B02G522600	0	0	0	0	0	0	OG0044748	GO:0005576
TraesCS3A02G101400	0	0	0	0.0226908	0	0.109155	OG0011404	GO:0005634
TraesCS2A02G583800	1.06351	0.951798	1.00406	1.57027	1.12798	2.66532	OG0018276	GO:0003677,GO:0003824,GO:0005634	0
TraesCS1B02G241200	0	0	0	0	0	0	OG0000353	GO:0005198,GO:0005730
TraesCS2D02G456100	1.35097	1.34171	1.34523	1.93034	1.06086	2.45655	OG0014277	GO:0005215	9254
TraesCS2D02G325700	0.258356	0.3396	0.184986	0.558088	0.222133	0.833137	OG0001001	GO:0005737	8967
TraesCS4B02G214200	1.08329	1.06237	1.57127	1.97433	0.784513	2.51802	OG0010813	GO:0005634	14346
TraesCS3D02G500000	0	0	0	0.304393	0	0	OG0000190	GO:0005634,GO:0005737
TraesCS3B02G523300	0	0	0	0	0	0	OG0055219
TraesCS3D02G191500	0.283463	0.350831	0.186753	0.363897	0.300412	0.416571	OG0002950	GO:0003723,GO:0004518,GO:0005739	12114
TraesCS2B02G604900	0	0	0	0	0	0	OG0023854
TraesCS4B02G359300	1.24122	1.5433	1.05801	2.32124	1.74208	3.00876	OG0056727	GO:0000166,GO:0003824,GO:0005622,GO:0005794	14638
TraesCS3B02G049100	0.877442	0.891718	0.754652	0.688652	0.966738	0.721999	OG0000546		125
TraesCS2B02G404500	1.4658	0.778124	0.620884	0.259071	0.612025	0	OG0000485		100
TraesCS4B02G217900	0.688192	0.633379	0.523681	1.16915	0.411567	1.73484	OG0010023		745
TraesCS1D02G357700	0	0	0	0	0	0	OG0000690	GO:0003824
TraesCS2D02G125100	0	0	0.0451427	0	0	0.0555693	OG0000830
TraesCS5B02G519100	0	0	0	0	0	0	OG0028807	GO:0003677,GO:0005622
TraesCS5A02G275700	0	0.0715613	0.149152	0	0	0	OG0027946
TraesCS5D02G133600	0.225697	0.146693	0.123239	0.235091	0.207256	0.489705	OG0002484	GO:0003677,GO:0003700	18228
TraesCS7D02G012200	0	0	0	0	0	0	OG0054051
TraesCS4B02G140900	3.344	2.99022	2.94662	3.84791	3.01737	5.13378	OG0001857	GO:0003723,GO:0005739	14157
TraesCS5D02G553900	0.125767	0.153986	0	0.260706	0.0720627	0.348922	OG0000667
TraesCS4B02G177300	0.848208	1.29991	0.929813	0.912708	1.11856	1.54565	OG0010032		14250
TraesCS6A02G306400	0.827026	0.725472	0.498206	0.87554	0.954617	1.73114	OG0004248		19784
TraesCS1B02G357300	0.437282	0.450234	0.443913	0.686065	0.44149	1.0089	OG0021004	GO:0005634	881
TraesCS3D02G079700	0.0681641	0.0606189	0.0237071	0.0581522	0.0636135	0.12632	OG0004624	GO:0005634,GO:0005737
TraesCS7A02G012700	0.0158566	0	0.0185276	0	0.0187055	0	OG0001913
TraesCS2D02G319100	0.200804	0.161147	0.404859	0.10325	0.621826	0.0276003	OG0009493	GO:0005634,GO:0005773	1045
TraesCS5B02G234600	3.48098	3.06106	4.00888	2.79776	4.9219	2.19353	OG0006351		2
TraesCS2D02G586000	0.501942	0.610721	0.534451	0.87662	0.695718	0.647269	OG0002551		9464
TraesCS7B02G268000	0	0	0	0	0	0	OG0013394	GO:0003676,GO:0005634
TraesCS2D02G010900	0	0	0	0	0	0	OG0000072
TraesCS7B02G386700	0	0	0	0	0	0	OG0000823	GO:0005488
TraesCS2D02G145200	0.14351	0.391489	0.362248	0.109881	0.0594568	0	OG0006822	GO:0005783
TraesCS5A02G372300	0.508008	0.495878	0.406254	1.00736	0.677535	1.05459	OG0012587	GO:0005634	16325
TraesCS7A02G164200	0	0	0	0	0	0	OG0044729	GO:0005488,GO:0005739
TraesCS2A02G007500	1.88535	0.774569	2.55152	1.76441	4.79859	3.00414	OG0003230	GO:0005794	2
TraesCS3D02G480600	0	0	0	0	0	0	OG0001303
TraesCS7A02G406800	17.9174	20.2847	8.47353	7.14685	8.22024	1.50786	OG0017136		1
TraesCS7B02G037200	0	0	0	0	0	0	OG0018891
TraesCS2A02G564000	3.76956	4.10295	2.58733	3.2992	1.59617	1.09356	OG0014265		7057
TraesCS2A02G486100	0	0	0	0	0	0	OG0015884
TraesCS7A02G522400	0	0	0	0	0	0	OG0013295
TraesCS5B02G013200	278.13	374.91	303.935	458.695	244.73	449.165	OG0001984	GO:0000166,GO:0003676,GO:0005618,GO:0005730,GO:0005777,GO:0005794	3
TraesCS6B02G022400	65.6908	65.4285	36.5454	64.833	27.8687	21.7716	OG0045840	GO:0005739	396
TraesCS5D02G043400	0.460734	0.377721	0.828738	0.43805	0.795045	0.0944803	OG0013532		2
TraesCS1B02G079000	1.79523	1.66094	1.23267	2.33584	1.59906	3.63823	OG0003589	GO:0005730,GO:0005783	4146
TraesCS7A02G484200	2.40173	2.50398	2.17337	1.71853	2.50276	0.966617	OG0010250		1
TraesCS1D02G049000	0.254106	0.154315	0.239873	0.380093	0.62359	0.848579	OG0000138	GO:0005739	5078
TraesCS5A02G522500	0.464418	0.558461	0.360922	0.85662	0.426607	1.07535	OG0013268	GO:0005488	16624
TraesCS2B02G304300	1.25003	0.922348	1.6577	1.70648	2.02149	1.6282	OG0005113	GO:0005634	7698
TraesCS3B02G460000	48.9328	39.768	50.7603	84.7591	51.4858	97.5524	OG0004457	GO:0005634,GO:0005737	0
TraesCS3B02G495200	0	0	0	0	0	0	OG0029403
TraesCS3B02G299600	13.6165	13.9354	10.5994	18.0901	7.21768	18.1222	OG0020216	GO:0000166	200
TraesCS6B02G418000	0	0	0	0	0	0	OG0001869	GO:0005634
TraesCS2B02G229400	6.06303	6.88575	2.46585	1.57622	3.10002	0.516835	OG0011085	GO:0005634	1
TraesCS4A02G383500	0	0	0	0	0	0	OG0000064
TraesCS7D02G245900	7.69201	9.05042	6.1264	9.04334	6.08947	3.73508	OG0002565	GO:0003677	1
TraesCS6D02G005300	0.632392	0.464205	0.849282	0.605018	0.962985	0.294626	OG0013390		2
TraesCS6D02G201600	6.16585	6.00418	3.6366	9.90353	4.04356	7.66113	OG0019825	GO:0003676,GO:0005622	1852
TraesCS7A02G294800	0.721236	0.570302	0.585971	0.667989	0.531601	0.766104	OG0016846	GO:0003700,GO:0005634	22379
TraesCS7D02G231100	0.744119	0.629531	0.670449	0.734512	0.712353	0.708481	OG0020481	GO:0005634	24305
TraesCS7D02G141500	0	0	0	0	0	0	OG0025492
TraesCS5B02G341400	0	0	0	0	0	0	OG0058206	GO:0005515,GO:0005739
TraesCS5D02G199800	1.25403	1.65511	0.739142	2.46352	0.564608	5.54071	OG0006367		30
TraesCS5B02G414800	1.25555	1.14176	1.09993	1.6505	1.09393	0.623186	OG0003137		1
TraesCS4B02G353500	8.65443	6.47186	5.17481	10.0883	6.26694	7.87561	OG0051310	GO:0005794	14629
TraesCS3B02G536000	0.547469	0.156443	0.207675	0.205357	0.406565	0.130699	OG0008612	GO:0003677	11628
TraesCS2A02G322500	1.40659	1.57201	0.725764	2.15097	0.933387	1.40735	OG0048830		6600
TraesCS2A02G317300	0.0590531	0.0927	0.101862	0.278226	0.145956	0.927614	OG0009647	GO:0005576,GO:0005634	530
TraesCS2D02G045700	0	0	0	0	0	0	OG0025017	GO:0005634,GO:0005773
TraesCS5D02G512800	0	0	0	0	0.0196873	0	OG0023498	GO:0005488
TraesCS4A02G404000	1.58947	1.46301	1.3216	1.24641	2.03392	2.16873	OG0004835	GO:0003676	13708
TraesCS3D02G114800	0	0.0661998	0	0.0451136	0	0	OG0000230	GO:0005634
TraesCS4D02G301100	0.148732	0.125526	0.172655	0.151599	0.220554	0.275831	OG0010568	GO:0003676,GO:0003700,GO:0005634
TraesCS2D02G212200	0.0278336	0.0160188	0.310635	0.266601	0.219235	1.19998	OG0000166		2380
TraesCS3A02G018200	0	0	0	0	0	0	OG0052249
TraesCS3D02G029600	0	0	0	0	0	0	OG0000188	GO:0005634
TraesCS3B02G369200	0.814025	0.610442	0.703056	1.08535	0.725638	1.0084	OG0000140		11335
TraesCS2A02G386800	0.313396	0.220903	0.315834	1.53715	0.714249	6.41814	OG0002646	GO:0003723,GO:0005634	0
TraesCS5B02G484900	0.0422668	0.071085	0	0.030929	0.0920523	0	OG0057479
TraesCS4A02G438100	0	0	0	0	0	0	OG0006008	GO:0005634,GO:0005783
TraesCS3B02G530400	0	0	0	0	0	0	OG0047283	GO:0003677,GO:0005634
TraesCS7A02G350800	0	0	0	0	0	0	OG0056505	GO:0005634,GO:0005737
TraesCS4A02G220900	0.325965	0.12197	1.00213	0.548791	0.959002	0.364928	OG0005829	GO:0005622	1682
TraesCS5B02G075000	0.0226908	0	0.026513	0.0166042	0.0258416	0.0567784	OG0001986	GO:0005634
TraesCS3B02G057800	0	0	0	0	0	0	OG0046834
TraesCS3D02G073200	0	0	0	0	0	0	OG0011375	GO:0005618
TraesCS1A02G237600	0	0	0	0	0	0	OG0001385	GO:0005576
TraesCS3D02G194800	0.904576	0.826872	0.989603	1.29478	0.824442	0.915919	OG0044437	GO:0003700,GO:0005634,GO:0005737	37
TraesCS6A02G166100	0.0145268	0.0398462	0.0159126	0.00504823	0	0.0348691	OG0012205	GO:0005634
TraesCS3D02G359200	0.00407067	0.013924	0	0.0123629	0.017597	0.0675534	OG0003711
TraesCS2B02G325900	0.262668	0.119369	0.0683541	0.198419	0.190818	0.434566	OG0000859	GO:0003676	7757
TraesCS3A02G319200	0.343912	0.153742	0.167178	0.315288	0.33045	0.334121	OG0011625	GO:0000166,GO:0003676,GO:0003700,GO:0005634	10196
TraesCS1A02G324900	0	0	0	0	0	0	OG0020753	GO:0000003,GO:0005488
TraesCS5B02G404000	1.5364	1.81533	1.62513	5.15552	2.91238	24.6385	OG0015081		0
TraesCS4B02G311600	19.2445	19.2277	22.0725	20.0582	22.4225	6.3473	OG0045349	GO:0003677,GO:0005634	1
TraesCS2A02G120800	0	0	0	0	0	0	OG0010877	GO:0005634
TraesCS3D02G312000	0.521628	0.590954	0.294207	2.05161	0.422204	12.4357	OG0046772	GO:0005576,GO:0005773	0
TraesCS7B02G167600	27.4271	26.536	30.0014	24.5596	27.0929	5.804	OG0012403		1
TraesCS7A02G471400	0	0	0	0	0	0	OG0028779	GO:0005634
TraesCS1B02G105700	0.607031	0.531074	0.319886	0.557694	0.513979	0.501962	OG0004098	GO:0003676,GO:0005634	121
TraesCS4B02G360900	1.05058	0.886329	0.438376	0.806906	0.328111	1.09997	OG0056851	GO:0005488,GO:0005634	12
TraesCSU02G254100	0	0	0	0	0	0	OG0057529	GO:0005488
TraesCS2D02G430000	3.21104	3.07939	2.75549	5.08047	3.2486	7.4927	OG0009674	GO:0005576,GO:0005768,GO:0005783,GO:0005794	6
TraesCS2D02G356400	9.09126	8.70242	10.1066	15.2803	7.41236	20.5318	OG0057759	GO:0005215,GO:0005783	11
TraesCS2D02G432100	0	0	0	0	0	0	OG0020511	GO:0005618
TraesCS2B02G191200	5.41159	4.31887	4.28313	7.1845	4.35602	8.0299	OG0018880	GO:0005634	722
TraesCS2A02G009500	0.320344	0.859615	0.599089	3.06399	0.513093	5.16094	OG0000321		20
TraesCS5A02G089200	5.99342	6.44658	6.79596	10.467	9.79645	15.7832	OG0047869	GO:0005783,GO:0005794	4
TraesCS3A02G292400	1.67791	1.90866	1.85013	2.0243	2.11898	3.03135	OG0015841	GO:0003677,GO:0005634	10127
TraesCS5B02G217100	0	0.00391053	0.0269194	0.00624084	0	0.0562909	OG0023173	GO:0005488,GO:0005773
TraesCS5A02G303600	0	0.0297623	0	0.0207113	0	0	OG0021012	GO:0000166,GO:0003676,GO:0005622
TraesCS5A02G342000	0	0	0	0	0	0	OG0051874	GO:0005515,GO:0005739
TraesCS7A02G342900	2.55754	2.6992	2.27079	4.01298	2.34467	4.68067	OG0011141	GO:0005634	22527
TraesCS6B02G004600	0.236614	0.17956	0.141602	0.179043	0.212435	0.097932	OG0013390	GO:0005634
TraesCS5A02G136200	2.95517	2.8433	3.72311	3.90678	5.54284	5.06826	OG0046975	GO:0005515,GO:0005794	672
TraesCS3A02G305300	0.00622535	0.0212942	0.0764272	0.0195233	0.0606099	0	OG0011431	GO:0003700,GO:0005634
TraesCS6B02G094600	4.25299	4.03186	4.32148	6.06265	5.17131	9.03957	OG0047690		0
TraesCS2A02G523500	3.33276	2.51788	3.40458	1.48413	3.6693	0.460355	OG0009655		1
TraesCS2B02G274400	4.27506	3.24394	3.54899	4.3695	4.36068	4.64906	OG0021777	GO:0003677,GO:0005654	7631
TraesCS6B02G185100	7.57487	7.14801	6.76267	7.63482	7.01701	10.5739	OG0020586	GO:0005576	20336
TraesCS1B02G408600	0.0314755	0.110894	0	0.45699	0.0915379	0.956331	OG0016096	GO:0005488,GO:0005622,GO:0005730,GO:0005777	228
TraesCS7D02G343200	4.45901	5.37777	3.38145	2.83954	3.0179	2.7448	OG0015130	GO:0005739	82
TraesCS3B02G247800	3.78949	3.22368	3.1535	3.60558	3.34402	2.58125	OG0003663	GO:0005634	1
TraesCS2B02G243100	0.775905	0.495632	0.657599	0.722959	0.743467	0.313241	OG0018722		7544
TraesCS6A02G084600	23.972	17.3357	21.1451	9.14261	26.1033	7.3325	OG0005347		1
TraesCS4B02G369000	0	0	0	0	0	0	OG0002426	GO:0005618,GO:0005783
TraesCS2D02G010800	23.005	25.6868	65.0069	26.638	56.4907	9.25569	OG0014088	GO:0003824,GO:0005634,GO:0005739,GO:0005768,GO:0005773	2
TraesCS2B02G405400	3.09022	3.51981	1.43521	1.0572	1.12545	0.506427	OG0050582	GO:0005773	915
TraesCS6B02G084400	167.688	180.96	117.31	89.0568	121.723	40.7684	OG0002042		1
TraesCS3A02G295800	0	0	0	0	0	0	OG0004515
TraesCS7D02G111900	0.38363	0.332554	0.308633	0.755755	0.233637	1.43078	OG0010585	GO:0005794	3
TraesCS2A02G159500	3.93058	4.87439	2.21287	1.33672	1.81686	0.42211	OG0010785	GO:0005488	1
TraesCS3A02G022900	0.0172335	0.0177146	0.0698101	0.125438	0.104209	0.453897	OG0005636
TraesCS1B02G378400	0.123914	0.277867	0	0	0.282241	0	OG0056202	GO:0003677,GO:0005634
TraesCS2B02G128500	0	0	0	0	0	0	OG0027853
TraesCS5D02G455700	8.48911	9.48901	12.8696	15.1037	16.2098	14.4367	OG0046852	GO:0005515	18943
TraesCS2B02G616000	0	0	0.0317193	0.00972661	0.015458	0	OG0008500
TraesCS7A02G107200	0.581582	0.53248	0.678556	0.75504	0.46791	1.19125	OG0048832		22005
TraesCS1B02G076000	0.0383388	0.196106	0.166606	0.118542	0.125551	0	OG0028973
TraesCS7A02G089400	0.0717747	0.0177333	0.108741	0.298191	0.22216	0.202829	OG0000231	GO:0005739	21971
TraesCS5B02G336200	0.0618815	0.192454	0	21.7491	0.0717368	167.466	OG0055160		39
TraesCS4B02G047600	0.564466	0.673547	0.266551	0.676579	0.263901	0.987041	OG0058192		1161
TraesCS3B02G319400	0.153148	0.0667482	0.103956	0.100552	0.0866562	0.150672	OG0015686	GO:0003677,GO:0005634
TraesCS7D02G035700	6.18452	3.82139	7.28933	4.00847	10.2733	1.6755	OG0026946	GO:0005783	2
TraesCS2B02G464200	0	0	0	0	0	0.0289794	OG0009687	GO:0003677,GO:0005634
TraesCS6B02G235700	4.74597	4.3033	3.38143	5.18558	2.59297	4.25368	OG0003721	GO:0003677	97
TraesCS1D02G210100	0.244282	0.0492637	0.122356	0.661668	0.814647	3.05319	OG0004588		0
[truncated: 105,893 more rows]

## Sheet: W2691+Sr9b
Table S6. Average gene expression (FPKM), orthogroup, GO terms, and coexpression cluster numbers associated with all genes W2691+Sr9b.
GeneID	FPKM2dpi_mock	FPKM2dpi_inoc	FPKM4dpi_mock	FPKM4dpi_inoc	FPKM6dpi_mock	FPKM6dpi_inoc	Orthogroup	Goterms	Cluster
TraesCS3B02G285200	0	0	0	0	0	0	OG0011235	GO:0004518,GO:0005737
TraesCS5B02G270200	49.0907	61.2661	45.3088	21.4492	18.2156	3.27855	OG0009185	GO:0005488	1
TraesCS4A02G248800	4.11085	4.6299	4.00691	6.5158	4.63801	7.45904	OG0002648	GO:0003676	819
TraesCS6A02G268400	0	0.028112	0	0.0880634	0.0567246	0.691456	OG0049599	GO:0003824,GO:0005488,GO:0005773,GO:0005794
TraesCS7A02G498400	1.02177	0.864932	1.23269	1.88464	1.23192	2.81493	OG0007122		267
TraesCS3D02G461500	0	0	0	0	0	0	OG0057524
TraesCS7A02G046100	0	0.0237364	0	0.243888	0.157096	0.15636	OG0049386
TraesCS3B02G579600	0	0	0	0	0	0	OG0000629	GO:0003677
TraesCS7B02G026000	0	0.019819	0	0	0	0	OG0000013	GO:0005634,GO:0005739,GO:0005773
TraesCS2B02G618400	0	0	0	0	0	0	OG0000868	GO:0003700,GO:0005634
TraesCS2A02G513700	0.129523	0.159916	0.462543	0.20237	0.0681341	0.0639387	OG0005143		1891
TraesCS5D02G517400	0	0	0	0	0	0	OG0025047
TraesCS2A02G245400	0	0	0	0	0.157864	0.15129	OG0028604	GO:0003676
TraesCS4D02G302700	0	0	0	0	0	0	OG0010408	GO:0003677,GO:0003700,GO:0005634,GO:0005739
TraesCSU02G254900	0	0	0	0	0	0	OG0013365
TraesCS5A02G147800	0	0	0	0	0	0	OG0055548
TraesCS7B02G206100	2.0606	2.42023	2.49592	2.81986	2.05682	2.6786	OG0046819	GO:0005488	19641
TraesCS1D02G331300	2.55579	2.70621	2.60423	3.27472	2.81622	4.00607	OG0012067		5943
TraesCS4A02G311800	0	0	0	0	0	0	OG0018166
TraesCS2B02G487000	0	0	0	0	0	0	OG0003915	GO:0003676
TraesCS2B02G136200	0	0	0	0	0	0	OG0028553	GO:0005618
TraesCS2B02G165300	0.216959	0.107754	0.142516	0.355969	0.140039	0.267061	OG0013339		7264
TraesCS7B02G202400	0.302883	0.421832	0.433284	0.793731	0.727465	0.905876	OG0008088	GO:0005488	19632
TraesCS5A02G479600	0.430802	0.633353	0.460014	0.741655	1.51094	0.813885	OG0006998	GO:0005634	7
TraesCS7B02G444200	0	0	0	0	0	0	OG0000823	GO:0005576
TraesCS3A02G328600	0.202127	0.415497	0.0586709	0.455027	0.211322	0.367991	OG0000326		242
TraesCS2D02G229000	4.18702	3.05823	4.05999	4.78463	3.72176	5.2078	OG0018479	GO:0000166,GO:0003676	8335
TraesCS2A02G517500	3.12383	2.98972	3.89968	3.41295	6.22659	3.33251	OG0056162		3
TraesCS5D02G289400	2.14152	1.66551	2.89316	2.5252	3.04811	3.40367	OG0013473	GO:0005634	15886
TraesCS1A02G053700	0.224675	0.105389	0.282385	0.0683667	0.646949	0.650746	OG0027898	GO:0005634	3970
TraesCS4A02G111200	0	0	0	0	0	0	OG0020076	GO:0003824,GO:0005634
TraesCS7D02G353800	0.21545	0.128674	0.241281	2.22334	0.409317	9.84743	OG0009926	GO:0005730,GO:0005737	0
TraesCSU02G117600	6.07896	5.49476	4.59785	7.84008	6.24828	11.4008	OG0008204	GO:0003824	1254
TraesCS7B02G007100	0	0	0	0	0	0	OG0024125
TraesCS1D02G203400	0.0400805	0.0358243	0.0503991	0.034249	0.0212663	0.067168	OG0005910	GO:0003676,GO:0003700,GO:0005634
TraesCS6A02G308300	0	0	0	0	0	0	OG0023600	GO:0005515
TraesCS4B02G306700	0	0	0	0	0	0	OG0000260	GO:0005634,GO:0005737
TraesCS7A02G035884	0	0	0	0	0	0	OG0001285	GO:0005488
TraesCS4D02G078800	0.0147755	0.0126169	0	0	0	0.0148808	OG0015265	GO:0004518,GO:0005654,GO:0005739
TraesCS4D02G046000	0.60143	0.515353	0.62289	0.812944	0.358201	0.732351	OG0020823		285
TraesCS2B02G065600	0.0025034	0	0.00194983	0.00140117	0	0	OG0001338
TraesCS5A02G401800	0	0	0	0	0	0	OG0014713	GO:0003677,GO:0005634
TraesCS6B02G196100	0	0	0	0	0	0	OG0003903	GO:0005622
TraesCS6A02G124500	0.931081	0.881114	0.941979	1.10943	1.12647	1.56863	OG0000016		16477
TraesCS5D02G502100	0	0	0	0	0	0	OG0029117	GO:0005576
TraesCS4A02G014400	0	0	0	0	0	0	OG0016580	GO:0005576,GO:0005773
TraesCS3A02G118000	0.0187848	0	0.0170185	0.00620176	0	0.0139094	OG0004241	GO:0005634
TraesCS6D02G290800	0.0874099	0.201045	0.104326	0.207564	0.0920211	0.253751	OG0001767
TraesCS3A02G392800	0.955549	0.97901	1.70367	2.16982	1.6352	1.8037	OG0003614		9576
TraesCS5B02G280200	11.4268	10.4371	7.8332	13.2543	15.1749	18.6972	OG0009296	GO:0005198	14900
TraesCS3B02G520600	0	0	0	0	0	0	OG0006082	GO:0005634
TraesCS3D02G343800	38.8556	38.419	49.7945	28.0612	45.8233	17.2451	OG0011472		5
TraesCS1B02G215600	0.386995	0.216124	0.373342	0.477455	0.320978	0.576012	OG0012222	GO:0005794	4947
TraesCS6A02G084500	0	0	0	0	0	0	OG0008076	GO:0003723,GO:0004518,GO:0005576
TraesCS2B02G608600	0	0	0	0	0	0	OG0001110
TraesCS7D02G091500	2.02813	2.819	1.18756	1.51195	2.30582	1.00968	OG0007411	GO:0003677,GO:0003723,GO:0005634,GO:0005739	12
TraesCS2D02G412500	0	0	0	0	0	0	OG0009554	GO:0003682,GO:0003700
TraesCS3A02G408500	0.0257078	0.0142432	0.0104201	0.0360391	0.0210143	0.0250825	OG0022087	GO:0003677,GO:0005654
TraesCS2B02G057500	0	0	0	0	0	0	OG0018046	GO:0005488
TraesCS2D02G359500	0.235642	0.286277	0.266615	0.167677	0.472967	0.216299	OG0052642	GO:0003677,GO:0005739	3032
TraesCS7D02G250000	0	0	0	0	0	0	OG0020747
TraesCS6A02G040500	0	0	0	0	0	0	OG0055388	GO:0003677,GO:0005730
TraesCS3B02G376300	0.639149	0.747432	0.88391	1.22392	1.34008	4.51952	OG0011216	GO:0005634	2
TraesCS3A02G449500	0.215419	0.243079	0.37027	0.0694824	0.645455	0	OG0000208
TraesCS2D02G398500	0.152024	0.366032	0.208664	0.679765	0.502044	0.956249	OG0006516		1407
TraesCS2D02G212100	6.30356	5.36076	7.36293	9.78805	8.59278	12.8485	OG0015434	GO:0005768	0
TraesCS3D02G206500	0	0	0	0	0	0	OG0029308
TraesCS2A02G362600	0.920648	0.937426	0.742596	1.47598	0.78394	1.75834	OG0003337		6738
TraesCS1D02G214300	5.07633	6.9914	5.90359	10.2516	6.90836	6.35181	OG0002657		5739
TraesCS3B02G424900	1.348	1.32361	1.556	3.05153	0.784606	4.78715	OG0004994	GO:0000003,GO:0005488	10383
TraesCSU02G034500	0	0	0	0	0	0	OG0028637	GO:0005618
TraesCS2D02G324000	0.849677	1.48583	0.310264	0.283801	0.173358	0	OG0003832	GO:0005773	147
TraesCS3D02G116100	0	0	0	0	0	0	OG0006911	GO:0005576,GO:0005737
TraesCS1A02G092300	0.0218931	0	0	0	0	0	OG0002121	GO:0005634
TraesCS3A02G415600	0	0	0	0	0	0	OG0000258	GO:0003676,GO:0005654,GO:0005737
TraesCS5A02G394200	0	0	0	0	0	0.0170263	OG0021030
TraesCS7B02G105500	0	0	0	0	0	0	OG0027941
TraesCS1B02G387700	2.05909	1.68385	2.70754	2.77517	2.51089	3.46374	OG0019332	GO:0003676	5248
TraesCS6B02G432200	7.23719	8.51939	5.74277	3.84303	11.6637	1.765	OG0048484		1
TraesCS4B02G313800	0	0.0236675	0.0455002	0.0657773	0.299751	0.239838	OG0028044	GO:0005634	369
TraesCS1B02G474700	0	0	0	0	0	0	OG0001281	GO:0005488
TraesCS2D02G290200	0.0326251	0.0782461	0.137967	0.0223218	0.355136	0.214329	OG0018264	GO:0000166,GO:0003774	1134
TraesCS2A02G121200	22.9828	22.5726	22.6021	51.7067	26.4981	59.6965	OG0010434	GO:0005576,GO:0005634,GO:0005739	0
TraesCS2D02G590800	0	0.00300525	0	0.00477474	0.00670672	0	OG0047746
TraesCS5B02G177100	0	0	0	0	0	0	OG0023303	GO:0003676
TraesCS4A02G135300	0.734812	0.545879	0.846983	0.7681	0.707703	1.0976	OG0045737		488
TraesCS3A02G023700	0.666374	0.8603	0.895751	0.581296	0.863579	0.647173	OG0019354	GO:0005488	8945
TraesCS2A02G183800	0	0	0	0	0	0	OG0001318	GO:0003676,GO:0005622
TraesCS2D02G285400	0.798443	0.731382	0.642025	0.690476	0.818427	0.77382	OG0006656	GO:0003723,GO:0005739	3013
TraesCS7A02G419700	0.0474512	0.132442	0.0359051	0	0.120878	0.219212	OG0007045
TraesCS2D02G224300	0.300314	0.13267	0.110304	0.120334	0.159956	0.203903	OG0014543	GO:0005618	75
TraesCS3A02G042400	0	0.130971	0	0.568701	0	1.02092	OG0005713	GO:0005634
TraesCS5D02G168300	0	0	0	0	0	0	OG0056613	GO:0005739
TraesCS7A02G323200	0.0545906	0.0559134	0.0495219	0.201158	0.0428425	0.213499	OG0006250	GO:0005654
TraesCS5A02G442800	0.0864854	0.165182	0.0956421	0.519024	0.222727	3.01203	OG0058915		2
TraesCS4D02G012300	0.627777	0.624464	0.991693	1.45901	1.19223	1.97314	OG0003511	GO:0005515,GO:0005794	48
TraesCSU02G072200	0	0	0	0	0	0	OG0022740	GO:0005768
TraesCS1B02G316700	0	0	0	0	0	0.0382451	OG0002924	GO:0005576,GO:0005783
TraesCS1A02G418300	4.17025	3.90207	3.14443	9.13297	7.10939	9.01647	OG0001234	GO:0005794	195
TraesCS7A02G257400	0.222487	0.193656	0.267329	0.368452	0.245876	0.687377	OG0001486	GO:0003723,GO:0005634	2
TraesCS5B02G090800	5.08776	3.93123	4.5922	6.34257	5.99666	7.81434	OG0008764	GO:0003676	39
TraesCS5B02G193800	0.200127	0.165282	0.236155	0.37648	0.222703	0.296331	OG0002467
TraesCS2D02G567600	2.14643	1.8607	2.07955	3.06998	2.48236	2.46946	OG0046332	GO:0003824,GO:0005768	8877
TraesCS2D02G408800	0	0	0	0	0	0	OG0001134	GO:0005730,GO:0005773
TraesCS5A02G095800	1.53113	1.04841	1.33401	1.22355	1.3748	1.43738	OG0017957	GO:0003824,GO:0005634	46
TraesCS1B02G269600	5.16493	5.16406	6.38352	7.52388	6.83526	9.59692	OG0007692	GO:0003677	2532
TraesCS6B02G282800	0	0	0	0	0	0	OG0059182	GO:0000003,GO:0005576,GO:0005618
TraesCS1B02G042100	0.0660593	0.0721635	0.0499972	0.0330979	0.0576104	0.0204316	OG0051941	GO:0000003,GO:0005634
TraesCS6B02G372100	2.30138	1.80836	2.14666	2.87878	2.87843	3.6824	OG0016529		17656
TraesCS7A02G066500	0.846853	1.21049	1.25088	2.10098	1.2046	2.17032	OG0055879	GO:0005488,GO:0005737	18570
TraesCS3B02G130500	0.132615	0	0	0.654546	0	0.670607	OG0000230	GO:0005634
TraesCS7A02G120300	12.1719	13.6594	14.0573	7.60725	21.7635	2.9729	OG0046249	GO:0005739	5
TraesCS2D02G300400	0.75978	1.00291	1.09051	1.84126	1.29315	1.89428	OG0055981	GO:0005488,GO:0005737	8481
TraesCS1B02G209100	3.22896	3.28807	3.76243	3.26564	3.30977	2.63778	OG0012544	GO:0005622	2507
TraesCS6B02G113700	1.20957	1.07154	1.27162	1.59509	1.984	2.40312	OG0005003	GO:0003676,GO:0005634,GO:0005634,GO:0005737	17145
TraesCS7B02G452300	0	0	0	0	0	0	OG0000056	GO:0003677,GO:0003700,GO:0005634
TraesCS4A02G024900	0	0	0	0	0	0	OG0001907
TraesCS3B02G010300	0	0	0	0.0310947	0	0	OG0003677	GO:0005737
TraesCS3A02G241200	0	0	0	0	0	0	OG0057115	GO:0005488
TraesCS7B02G234300	0.660156	0.716809	0.517339	0.311401	0.046724	0.0690084	OG0012906	GO:0005739	381
TraesCS2D02G316700	80.2001	82.8248	83.4559	98.7926	101.445	99.0315	OG0053010	GO:0003677,GO:0005634	0
TraesCS5A02G184800	0.94772	0.652259	0.716845	1.01798	0.704477	1.37546	OG0045142	GO:0003723,GO:0004518	13871
TraesCS5D02G016000	4.09219	3.52422	4.0603	5.6191	4.09106	5.36312	OG0006863	GO:0005634,GO:0005783	15360
TraesCS5B02G458900	0	0	0	0	0	0	OG0014578	GO:0000003,GO:0005576,GO:0005618
TraesCS4B02G394400	0.0287772	0.0125756	0	0	0	0.0625469	OG0000512
TraesCS4A02G059600	4.82444	5.85861	5.78683	5.80764	8.52825	6.27208	OG0007448	GO:0003676,GO:0003700,GO:0005634	7
TraesCS6D02G050600	0.00216925	0	0	0.0123662	0.0148949	0.039045	OG0000067
TraesCS3D02G163700	0	0	0	0	0	0	OG0002204	GO:0003677,GO:0005634
TraesCS4D02G044500	0.0842147	0.316892	0.922047	0.736437	0	1.31967	OG0015304	GO:0000166,GO:0005739	86
TraesCS7B02G171600	0.205073	0.0858312	0.125213	0.222262	0.0561331	0.511891	OG0000008		3881
TraesCS7A02G194800	0.0338943	0.0120648	0	0	0.0133082	0.030709	OG0010449
TraesCS2D02G211800	0.629728	0.727654	0.940037	0.151645	2.28769	0.257932	OG0010038	GO:0005488	3
TraesCS2A02G442200	0.0547953	0.047891	0.0613795	0.0339085	0.376947	0.0989258	OG0000332
TraesCS5A02G390700	14.4341	12.529	18.8919	15.4994	22.3036	14.6207	OG0018574	GO:0005739	107
TraesCS1D02G438200	0	0	0	0	0	0	OG0013369
TraesCS7A02G347000	0	0	0	0	0	0	OG0000447
TraesCS7D02G200500	0	0	0	0	0	0	OG0000388	GO:0005634
TraesCS2A02G295900	3.26434	2.93841	2.97782	4.33446	3.51524	5.36737	OG0009693	GO:0000003	6623
TraesCS7D02G043100	0	0	0	0	0	0	OG0015194
TraesCS3D02G494100	0.858807	0.82283	0.785721	1.21325	0.837132	1.76029	OG0045450	GO:0005634,GO:0005773,GO:0005794	98
TraesCS1A02G435600	0.386666	0.496828	0.21992	0.66198	0.219952	0.790775	OG0003600		714
TraesCS1B02G119300	0.705536	0.560231	0.489498	0.348378	0.754312	0.186349	OG0052065		42
TraesCS2A02G047900	0	0	0	0	1.05912	0	OG0009448
TraesCS5A02G041000	0	0	0	0	0	0	OG0000201	GO:0005634
TraesCS2A02G313200	1.40541	1.27115	1.26821	2.49433	1.75549	3.22581	OG0006538		186
TraesCS3D02G067000	0.237888	0.329473	0.40858	0.37046	0.366931	0.875555	OG0002757	GO:0003676,GO:0004518	260
TraesCSU02G037300	0	0	0	0	0	0	OG0002415	GO:0000166,GO:0005737
TraesCS3B02G356300	1.74287	1.78108	0.769756	2.90813	2.87776	16.0244	OG0015544	GO:0005634,GO:0005783,GO:0005794	2
TraesCS5A02G412000	0	0	0	0	0	0	OG0004376
TraesCS3B02G530400	0	0	0	0	0	0	OG0047283	GO:0003677,GO:0005634
TraesCS2D02G391400	0	0.0273941	0	0	0.0509287	0.166327	OG0000787	GO:0003677,GO:0003700,GO:0005634
TraesCS6D02G163800	0.142162	0.226482	0.0985813	0.203203	0.153561	0.202577	OG0019785
TraesCS3D02G307800	0	0	0.018333	0.0107582	0	0.0338628	OG0002922	GO:0005739
TraesCS7D02G456900	0.00309376	0.0209819	0.0135315	0.00916962	0.00911055	0.0133253	OG0010852
TraesCS4A02G178400	1.29683	0.912256	1.2993	1.72739	1.34745	1.76576	OG0009160	GO:0003723,GO:0005730,GO:0004518	11776
TraesCS7D02G161500	0.35588	0.334792	0.408912	0.919251	0.417871	2.79635	OG0004168		0
TraesCS4A02G021700	0.107625	0.00867712	0.0354463	0	0	0.0572003	OG0015108	GO:0005634
TraesCS1A02G433000	2.473	3.06942	2.33947	4.84758	2.85991	4.97827	OG0000909	GO:0003723,GO:0005634,GO:0005777	725
TraesCS6A02G402300	0	0	0	0	0	0	OG0008567
TraesCS2A02G182600	41.3216	34.3264	47.0948	57.7788	48.7046	43.9521	OG0044346	GO:0005634	6392
TraesCS2A02G567500	0	0	0	0	0	0	OG0000395	GO:0003676
TraesCS7B02G060800	1.03798	0.726997	0.76733	1.00619	1.055	1.04213	OG0055002	GO:0005654,GO:0005730	3546
TraesCS5B02G265300	0	0	0	0	0	0	OG0014041	GO:0003700,GO:0005634
TraesCS7B02G344700	0	0	0	0	0	0	OG0008736
TraesCS2A02G346300	0	0	0	0	0	0	OG0005173	GO:0003677,GO:0005730
TraesCS6A02G158000	0.247581	0.277749	0.253696	0.258751	0.261156	0.202664	OG0020834
TraesCS7B02G028100	1.25702	0.993978	2.36181	0.973655	1.12925	1.04957	OG0004329	GO:0005739	46
TraesCS2B02G584100	0.150372	0.303219	0.154033	0.277401	0.83283	0.212061	OG0027695	GO:0005739	71
TraesCS7B02G483700	0.284982	0.422547	0.333934	0.769554	0.340648	0.603937	OG0000408		20050
TraesCS6A02G414300	0	0	0	0	0	0	OG0000578	GO:0005622,GO:0005634,GO:0005737
TraesCS3D02G100200	0.725538	0.776094	0.581838	1.55138	0.734841	1.51648	OG0006278		10715
TraesCS1B02G234500	0	0	0	0	0	0	OG0016402
TraesCS2B02G138600	0.558663	0.646094	0.380106	0.899754	0.578098	1.51766	OG0010080	GO:0003723,GO:0004518,GO:0005739	297
TraesCS7A02G206200	8.04325	12.8907	5.79315	10.4629	0.25311	3.12603	OG0001786	GO:0005634	100
TraesCS5D02G514600	0	0	0	0	0	0	OG0053197
TraesCS1D02G401000	0	0	0	0	0	0	OG0055483	GO:0005783
TraesCS3D02G331700	0	0	0.0237542	0	0	0	OG0047622
TraesCS2B02G078100	0	0	0	0	0	0	OG0000069	GO:0005634,GO:0005739
TraesCS2B02G155000	0.136043	0.0428416	0.134726	0.158834	0.0652622	0.133591	OG0014697	GO:0005634
TraesCS7A02G160900	0	0	0	0.0490345	0	0.0343734	OG0024470	GO:0005768,GO:0005794
TraesCS1A02G211100	0	0	0	0.0166819	0.0239039	0.0821084	OG0022110	GO:0005773
TraesCS5D02G027200	0.297598	0.153985	0.121526	0.392695	0.216481	0.588453	OG0045939		15378
TraesCS1D02G157400	0.28163	0.407514	0.508048	0.246929	0.327398	0.877427	OG0016830		498
TraesCS6D02G215100	0.763184	0.880699	1.0166	1.77749	1.2365	2.08276	OG0044593	GO:0005783	48
TraesCS5B02G540800	0	0	0	0	0	0	OG0023556	GO:0005622,GO:0005634,GO:0005737
TraesCS7B02G405000	0.50895	0.390182	0.183502	0.761239	0	0.769009	OG0000618	GO:0005488	1533
TraesCS5A02G039000	0.00667981	0	0	0	0	0	OG0003674	GO:0005488
TraesCS2D02G245700	0.00302411	0.00432099	0.0037108	0.00611451	0.00125861	0.0185652	OG0002780	GO:0005634
TraesCS3B02G265300	0	0	0	0	0	0	OG0002479	GO:0003677,GO:0005634
TraesCS3A02G389600	0.803037	0.864835	0.798664	0.581462	0.818953	0.407049	OG0015846	GO:0000166,GO:0003676	1475
TraesCS1D02G023900	0	0	0	0	0	0	OG0003675	GO:0003676
TraesCS3A02G323400	0	0	0	0	0	0	OG0020675	GO:0005634,GO:0005773
TraesCS6B02G442700	0	0	0	0	0	0	OG0000184
TraesCS3D02G347100	7.40278	10.6586	6.98066	17.1748	7.35568	20.4898	OG0001063	GO:0003723,GO:0005198,GO:0005730,GO:0005739	6
TraesCS1B02G377700	2.834	2.65924	2.71863	5.22468	3.7375	9.05744	OG0011961		0
TraesCS2B02G265300	0	0	0	0	0	0	OG0001293
TraesCS7D02G425800	0	0	0	0	0	0	OG0028018
TraesCS1A02G134000	4.08147	2.87653	2.71612	7.28606	2.36655	13.3009	OG0013091	GO:0005773,GO:0005794	0
TraesCS2A02G288200	28.1129	26.2115	24.5963	31.3119	26.4202	28.8345	OG0002098		6614
TraesCS1D02G088400	0	0	0	0	0	0	OG0002321	GO:0004518
TraesCS2D02G583800	0	0	0	0	0	0	OG0001355	GO:0005576
TraesCS2A02G517400	0.0353333	0.0628082	0	0.0483495	0.10405	0.0740784	OG0001005	GO:0005634,GO:0005739
TraesCS5A02G017400	3.48388	2.83765	3.54632	3.13195	3.24942	3.48733	OG0022873	GO:0005488	220
TraesCS2A02G238800	4.36577	3.50396	3.65682	3.8883	2.64561	4.3497	OG0015492	GO:0003676,GO:0005634,GO:0005737	6507
TraesCS6B02G381700	2.30694	5.14008	2.01484	2.91193	2.23116	1.56535	OG0002917		11
TraesCS1A02G344500	0	0	0	0	0	0	OG0028851	GO:0005737
TraesCS5A02G073800	32.6502	36.0326	43.6226	52.9915	61.9982	98.1783	OG0058058	GO:0005198,GO:0005730	2
TraesCS2A02G432400	0	0	0	0.363357	0	0.500512	OG0001378	GO:0003677,GO:0005634,GO:0005737
TraesCS6D02G380200	1.22244	1.12427	1.1306	1.76289	1.18496	2.21385	OG0005837		18437
TraesCS1B02G262500	0	0.0103088	0	0.0388717	0	0.108977	OG0000326
TraesCS7A02G145900	0.301634	0.301394	0.347293	0.354615	0.642599	0.200662	OG0003736		7
TraesCS2D02G506200	1.79576	3.78	3.33394	12.2995	18.561	21.4489	OG0001784	GO:0005739	0
TraesCS5D02G562300	1.55733	1.72073	2.09644	2.62078	2.08758	2.42455	OG0006802	GO:0003723	16297
TraesCS5B02G167400	1.5878	1.49683	1.52896	2.2659	1.61544	3.67299	OG0006157	GO:0003723,GO:0005634	2
TraesCS2D02G037700	1.27935	1.26013	1.28644	1.90971	1.21841	2.33366	OG0006605	GO:0000166,GO:0003676,GO:0005634	1417
TraesCS3A02G518600	2.75743	2.97318	2.16258	2.20948	2.28026	2.05508	OG0011487	GO:0005576,GO:0005654,GO:0005773	1
TraesCS7B02G124300	0	0	0.0381445	0	0.0171003	0	OG0006869
TraesCS7D02G100300	0.646201	0.769994	0.345582	0.799385	0.695322	0.708645	OG0000214	GO:0005488	20189
TraesCS2A02G549400	0	0	0	0	0	0	OG0010935	GO:0003677
TraesCS1D02G430100	0	0	0	0	0	0	OG0028893	GO:0000003,GO:0005618
TraesCS5A02G485100	6.84197	6.0228	7.3204	10.3027	10.5938	12.4022	OG0001201	GO:0005634,GO:0005773,GO:0005794	1081
TraesCS7A02G133300	48.9338	34.1393	49.9224	33.5996	24.0778	21.6549	OG0006924	GO:0004518	59
TraesCS3B02G550100	0	0	0	0	0	0	OG0028758
TraesCS7D02G045600	0	0	0	0	0	0	OG0024559
TraesCS5A02G007300	0	0.00735099	0	0	0	0.0169229	OG0008578
TraesCS7D02G098600	2.87245	2.61268	3.98351	7.32301	6.64805	14.7789	OG0005522	GO:0005783	0
TraesCS5D02G095600	8.17968	5.67255	13.4564	4.74409	12.039	4.63434	OG0001143	GO:0003682,GO:0003700,GO:0005634	496
TraesCS3B02G005300	0	0	0	0	0	0	OG0000641	GO:0003676
TraesCS7A02G322900	0	0.0708084	0	0.0789281	0.0344452	0	OG0003781	GO:0005737
TraesCS1A02G049200	0	0	0	0	0	0	OG0048057	GO:0005739
TraesCS3B02G469000	6.8091	6.04951	7.34104	14.1249	8.65165	17.5412	OG0011248	GO:0005622	4
TraesCS6A02G410100	0	0	0	0	0	0	OG0006489
TraesCS3B02G233700	0	0	0	0	0	0.105251	OG0016287	GO:0005634
TraesCS7A02G426700	2.1571	1.04761	0	0.530498	0	2.40914	OG0004361	GO:0005794
TraesCS2A02G021200	0.0189599	0.0368485	0	0.128202	0	0.431092	OG0020901	GO:0005634
TraesCS5B02G175500	9.28424	7.86702	11.1039	12.1378	12.8361	11.7926	OG0002531	GO:0004518,GO:0005622,GO:0005634	14725
TraesCS4A02G062400	0.00594114	0	0	0.00812974	0.0174956	0	OG0007324	GO:0005622,GO:0005737
TraesCS7D02G408200	6.00196	5.8572	7.1719	12.0543	9.47843	14.4243	OG0013529	GO:0003677	2998
TraesCS7B02G422100	0	0	0	0	0	0.0120396	OG0000721	GO:0003677,GO:0003682,GO:0003700,GO:0005634
TraesCS6D02G042400	1.12571	1.17304	1.13079	0.747145	0.799819	1.84692	OG0001932		17879
TraesCS6B02G449500	0	0	0	0.0111879	0	0.0442065	OG0020856
TraesCS5B02G370200	0.268515	0.32996	0.148677	0.373231	0.200921	0.487887	OG0006343	GO:0005739	2876
TraesCS7A02G562700	0.8009	0.576823	0.817061	0.888817	0.871867	1.0281	OG0006874	GO:0005634,GO:0005737	19325
TraesCS1D02G188700	0	0	0	0.0624045	0	0.332189	OG0003737	GO:0003677,GO:0003700,GO:0005634
TraesCS7D02G054400	0	0	0	0	0	0	OG0020839	GO:0005488
TraesCS5D02G152000	0	0	0	0	0	0	OG0000527	GO:0005654,GO:0005737
TraesCS7D02G494800	1.17619	0.875638	1.36963	0.932848	4.99332	2.07902	OG0000891	GO:0005739	1092
TraesCS5D02G089700	1.60762	1.7107	1.72876	2.49046	2.71141	3.12242	OG0004017	GO:0005737	15484
TraesCS6D02G068600	0	0	0	0	0	0.0364592	OG0004753	GO:0005488
TraesCS2B02G360600	0	0	0	0	0	0.122777	OG0000686
TraesCS4D02G208900	0.165191	0.642368	0.041145	0.0934869	0.0395095	0.280187	OG0058561		274
TraesCS2B02G091000	0	0.0228526	0.0154563	0.0224349	0	0	OG0013409	GO:0005783
TraesCS6B02G067400	0	0	0	0.0201759	0	0	OG0027801
TraesCS1D02G003800	0.0310944	0.0855482	0	0.0396812	0.0351574	0.0280684	OG0007878	GO:0003676
TraesCS1D02G302600	0	0	0	0	0	0.00473502	OG0011308
TraesCS3D02G234100	6.72468	5.6972	6.9412	8.68717	6.78082	9.13767	OG0005674	GO:0005488,GO:0005773	10963
TraesCS2B02G539200	0	0.0144556	0	0	0.0318908	0.0700527	OG0000146
TraesCSU02G125900	0	0	0	0	0	0	OG0047825	GO:0005618,GO:0005622,GO:0005730,GO:0005773
TraesCS3B02G405900	0	0	0	0	0	0	OG0001829	GO:0005576,GO:0005618
TraesCS2D02G113300	0.524414	0.465987	0.583924	0.650947	0.416294	0.554039	OG0011045		8134
TraesCS5D02G040600	2.40362	2.39806	2.34047	3.61349	2.40968	4.61928	OG0000673	GO:0005198	15400
TraesCS6A02G072600	0.177145	0.309396	0.197278	0.555441	0.333199	0.751886	OG0016641	GO:0003723,GO:0004518,GO:0005634,GO:0005739	115
TraesCS5A02G184900	0.755547	0.634561	0.628688	1.16445	0.552147	1.29658	OG0049484		13872
TraesCS3D02G011400	0.405792	0.421442	0.328951	0.508957	0.335914	0.606089	OG0024106		10614
TraesCS3D02G305100	0	0	0	0	0	0	OG0028746	GO:0005576
TraesCS1A02G424500	0	0	0	0	0	0	OG0024297
TraesCS7D02G080200	0.597381	0.877297	0.943593	1.68822	1.90146	2.59373	OG0001654	GO:0003824,GO:0005488,GO:0005634,GO:0005773	0
TraesCS5A02G357700	1.56621	1.80443	1.60378	2.72289	1.61689	3.96657	OG0006758	GO:0005198,GO:0005488,GO:0005739	133
TraesCS2D02G561900	0.726712	0.454225	0.572341	0.68025	0.544892	0.531503	OG0009636	GO:0000166	8866
TraesCS3D02G189000	0	0	0	0	0	0	OG0052911
TraesCS3D02G088700	0	0	0	0	0	0	OG0000134	GO:0005488
TraesCS3D02G096900	0	0	0	0	0	0	OG0003860	GO:0005739
TraesCS2A02G520700	3.8471	3.42599	4.21611	5.04797	4.89971	4.9435	OG0002616	GO:0005634,GO:0005794	6990
TraesCS1D02G454500	0.410667	0.402488	0.29355	0.591726	0.352568	0.687104	OG0028554	GO:0005737	6126
TraesCS7D02G467700	0	0.0143618	0	0.0216029	0	0.0296664	OG0001019	GO:0005634
TraesCS1A02G275100	0	0	0	0	0	0	OG0017719
TraesCS7D02G244200	2.13088	1.65668	1.79795	2.07451	2.0491	2.77161	OG0008086		20404
TraesCS5A02G016100	0	0	0	0	0	0	OG0000562	GO:0003676,GO:0005622
TraesCS6A02G105600	0	0	0	0	0	0	OG0008548	GO:0005634
TraesCS2A02G118300	0.284401	0.841067	0.326611	0.345384	0.33433	0.294308	OG0016643		257
TraesCS2B02G206000	0	0	0	0.0656272	0	0.147189	OG0000773	GO:0003723,GO:0005198
TraesCS6A02G027500	0	0	0	0	0	0	OG0000312	GO:0003723
TraesCS2B02G115000	0	0	0	0	0	0	OG0002043
TraesCS7D02G545500	0	0	0	0	0	0	OG0017781	GO:0005737
TraesCSU02G010300	0	0	0	0	0	0.0245549	OG0000397
TraesCSU02G101200	0	0	0	0	0	0	OG0028639	GO:0005515,GO:0005739,GO:0005783
TraesCS1A02G062200	0	0	0.0866461	0	0	0	OG0015791	GO:0005634,GO:0005739
TraesCS7D02G476400	0	0	0	0	0	0	OG0005822	GO:0005488
TraesCS6A02G207000	0.00814901	0.0449791	0.0190023	0.0922563	0.0559544	0.099895	OG0004131	GO:0003723,GO:0005634,GO:0005730,GO:0005773
TraesCS7B02G333200	0.0275695	0.0260158	0	0.0170606	0.025968	0.0891983	OG0015092	GO:0005634
TraesCS5A02G239700	0	0	0	0	0	0	OG0001998	GO:0005488,GO:0005576
TraesCS3A02G393000	1.04517	1.06131	0.957845	1.60895	1.13026	2.42509	OG0004994	GO:0000003,GO:0005488,GO:0005576	706
TraesCS1D02G043300	32.2205	34.734	45.6871	46.971	56.6843	31.2824	OG0001143	GO:0003682,GO:0003700,GO:0005634	5402
TraesCS5D02G401400	2.19748	1.62962	1.82732	2.61306	3.76348	2.92432	OG0009812	GO:0005773	1011
TraesCS2D02G184000	0	0.0462549	0	0	0	0	OG0017935
TraesCS1A02G326900	8.20189	7.1879	6.32519	9.51885	5.89842	10.1858	OG0011579		1630
TraesCS3D02G062900	0	0	0	0	0	0	OG0057835	GO:0005773
TraesCS2B02G559500	0.0853967	0.0834513	0	0.111377	0.0279645	0.099157	OG0009337	GO:0003723,GO:0004518,GO:0005739
TraesCS7A02G309900	12.9693	19.6263	13.8141	28.5586	16.3361	36.7031	OG0046014	GO:0003824,GO:0005198,GO:0005730	6
TraesCS6A02G358200	2.08653	2.2042	2.99894	3.01175	2.29554	3.33304	OG0002364	GO:0003676	16889
TraesCS3D02G049800	0	0	0	0	0	0	OG0021869
TraesCS4B02G280100	0	0.0662618	0	0.0943737	0.0431083	0.0889382	OG0002839
TraesCS5A02G147900	0	0	0	0	0	0	OG0021419	GO:0003723,GO:0004518
TraesCS1A02G304800	0	0	0	0	0	0	OG0000334	GO:0005618,GO:0005739
TraesCS2B02G084400	0	0	0	0	0	0	OG0017596
TraesCS3D02G544300	0	0	0	0	0	0	OG0017717
TraesCS5D02G232700	0	0	0	0.107584	0.0478079	0.61079	OG0013574	GO:0003700,GO:0005634
TraesCS1B02G092300	0.793822	0.643735	0.672046	0.538609	0.96071	0.44053	OG0054785		3
TraesCS2D02G047700	0	0	0	0	0	0	OG0005142
TraesCS2B02G079400	262.697	318.294	106.331	126.545	74.3677	21.3822	OG0000123	GO:0005618	1
TraesCS3D02G297400	0	0	0	0	0	0	OG0016101	GO:0003824,GO:0005488,GO:0005773
TraesCS4A02G173300	8.12596	5.69631	9.4522	14.4632	14.8783	18.3404	OG0001143	GO:0003682,GO:0003700,GO:0005634	1708
TraesCS1A02G034500	0	0	0	0	0	0	OG0007298	GO:0003700,GO:0005634,GO:0005777
TraesCS4A02G297000	0	0	0	0	0	0.644279	OG0004286	GO:0005215,GO:0005488,GO:0005634,GO:0005737
TraesCS5D02G322600	0.0204652	0	0	0	0	0	OG0013746
TraesCS5D02G269400	0	0.0687352	0	0.288327	0.0758192	0.913808	OG0001887	GO:0005739
TraesCS3B02G352000	0	0	0	0.0197412	0	0	OG0013320
TraesCS5D02G075000	0.634235	1.1236	0.230583	0.43494	0.614924	0.105342	OG0015084		12
TraesCS6B02G094400	0.0466213	0.0455519	0.0529539	0.0712827	0.0604987	0.0378695	OG0006194	GO:0003677,GO:0005730
TraesCS4B02G228400	10.0672	8.89539	8.25019	14.9634	11.6188	16.0354	OG0005252	GO:0003723	1046
TraesCS7A02G231400	1.47127	1.26118	0.942477	1.2414	1.45247	1.27015	OG0010464		1041
TraesCS5B02G411700	3.7757	3.48651	3.70279	4.85665	3.03542	4.91901	OG0007144		15102
TraesCS2D02G224600	5.84049	5.39755	6.07295	7.54629	5.48873	6.68608	OG0003406		8328
TraesCS1D02G108600	0	0	0	0	0	0	OG0007624
TraesCS1B02G470300	0	0	0.0460238	0	0	0	OG0000903
TraesCS5B02G334200	0.0671918	0.0324713	0.0148503	0.00995166	0.0171177	0.0457422	OG0001289
TraesCS6B02G386900	0	0	0	0	0	0	OG0022098	GO:0004518
TraesCS6B02G139900	0	0	0	0	0	0	OG0051222
TraesCS3B02G548000	0.875207	0.676903	0.635658	0.955279	0.823438	1.18482	OG0004420	GO:0005634,GO:0005773,GO:0005794	10537
TraesCS4D02G295400	0	0	0	0.067934	0	0.232854	OG0052389	GO:0005488,GO:0005576
TraesCS3A02G037000	0	0	0	0	0	0	OG0003682
TraesCS4D02G020800	0	0	0	0	0	0	OG0018563	GO:0003677,GO:0005730,GO:0005737
TraesCS3B02G057947	0.00422156	0.0134169	0.0124228	0.017273	0.0099482	0.0414251	OG0000092
TraesCS3B02G078900	0.869176	0.524314	0.715204	1.21581	1.31623	1.13224	OG0007906	GO:0005622	9827
TraesCS5D02G153600	5.46774	3.38708	7.30569	3.27102	12.3967	4.90796	OG0018171	GO:0005215	3
TraesCS4A02G060900	0.183765	0.617952	0.529425	1.13201	0.958579	1.0304	OG0018748	GO:0005739,GO:0005764	11535
TraesCS7A02G395600	0	0	0	0	0	0	OG0008530	GO:0005576
TraesCS6D02G078100	0	0.0870215	0.195331	0	0.412721	0	OG0004991	GO:0003676
TraesCS5B02G083000	0.689112	0.472783	0.349258	1.28295	0.593794	1.43592	OG0049948	GO:0005618,GO:0005622	207
TraesCS1B02G172100	0	0	0	0	0	0.0453337	OG0000163	GO:0003677,GO:0005634
TraesCS2D02G452200	0	0	0	0.0227544	0	0.0752381	OG0009736
TraesCS1D02G235400	1.62104	1.81427	2.4555	2.52835	2.208	2.95038	OG0007702	GO:0005737	5776
TraesCS5B02G436100	0	0.0582363	0.133795	0.373523	0.128476	0.716052	OG0000335
TraesCS3A02G059600	0.843819	2.91586	1.92043	1.89795	2.76849	2.07408	OG0019346	GO:0005739	9
TraesCS7A02G366700	0.354873	0.352943	0.326238	0.769693	1.08482	1.03795	OG0004784		1099
TraesCS5A02G455000	2.49047	2.15339	2.81369	4.28126	3.54613	5.12583	OG0000433	GO:0005622,GO:0005730,GO:0005739	14271
TraesCS1A02G436500	0.324333	0.305234	0.113252	0.204218	0.0510253	0.695138	OG0000746		1651
TraesCS2B02G112900	0	0	0	0	0	0	OG0004789
TraesCS6B02G384000	0	0	0	0.00304937	0	0	OG0052162
TraesCS2A02G463900	9.14357	10.885	8.73813	14.1949	12.9441	18.8431	OG0004148	GO:0005515,GO:0005773	142
TraesCS5A02G474200	0	0	0.0292457	0.0161565	0	0	OG0002797
TraesCS5D02G318700	0	0	0	0	0	0	OG0020164	GO:0003677,GO:0003700,GO:0005634
TraesCS7D02G140300	1.94239	2.15025	2.29976	3.05975	2.94658	3.93042	OG0003147	GO:0005794	20242
TraesCS5A02G551400	0	0.00746664	0	0	0	0	OG0000586
TraesCS3D02G303800	0	0	0	0	0	0	OG0000190
TraesCS1B02G263500	0.0125132	0.0375169	0.0255515	0	0	0	OG0005702	GO:0000166
TraesCS7A02G344600	7.15537	8.40353	4.32646	5.24415	6.42697	8.62767	OG0010615	GO:0005488,GO:0005634	1320
TraesCS1A02G155300	0	0	0	0	0	0	OG0019675	GO:0003677,GO:0003682,GO:0005634
TraesCS6A02G303800	234.495	254.939	140	119.553	98.8711	37.6311	OG0019566	GO:0005488	1
TraesCS6A02G346500	0	0	0	0	0	0	OG0057549	GO:0005488,GO:0005576,GO:0005764
TraesCS5B02G460300	0	0	0	0	0	0	OG0000932	GO:0005634
TraesCS4A02G283900	0.515527	1.00231	0.31733	5.37503	0.746839	10.8188	OG0005493		0
TraesCS5B02G266300	3.24601	3.43648	2.46124	4.24305	3.61772	2.76484	OG0002565	GO:0003677,GO:0005576	3361
TraesCS2B02G413400	0	0	0.0207476	0.0301152	0	0.0190932	OG0021538	GO:0005730,GO:0005737
TraesCS2B02G060600	0	0	0	0	0	0	OG0002614
TraesCS3D02G396800	0	0.00924663	0	0.671503	0	4.37949	OG0000955	GO:0005488,GO:0005634,GO:0005739
TraesCS3B02G175300	0.235958	0.259376	0.305748	0.297487	0.183582	0.560561	OG0005555		9964
TraesCS3A02G490300	3.30266	3.72781	4.46835	5.78439	3.7105	6.21888	OG0001246		9702
TraesCS2B02G366700	0.470265	0.3504	0.418516	1.04884	0.608671	2.04247	OG0001660	GO:0005794	21
TraesCS2A02G408500	0	0.0742481	0.113819	0.120735	0.377816	0.499928	OG0057316	GO:0005576,GO:0005618,GO:0005654,GO:0005730,GO:0005773	655
TraesCS4D02G006600	3.75063	5.09902	3.23687	1.13567	6.08419	0.193402	OG0003245		390
TraesCS3A02G040200	0	0	0	0	0	0	OG0010012	GO:0000166,GO:0005576
TraesCS6A02G005000	0.0127039	0.019212	0.00961734	0	0	0	OG0002731
TraesCS3D02G408200	3.02286	2.19696	2.996	2.68293	2.43557	3.84617	OG0015593		11258
TraesCS7B02G269000	3.69146	3.15532	3.29456	4.48829	4.1156	5.61442	OG0004357		19769
TraesCS6D02G073300	0	0	0	0	0	0	OG0003739	GO:0005576,GO:0005618,GO:0005737
TraesCS1A02G222700	0.439366	0.573372	0.198296	0.281715	0.133748	0.116339	OG0020633		11
TraesCS6B02G233400	0.293444	0.218627	0.37355	0.243256	0.302077	0.424871	OG0012994	GO:0003723,GO:0004518,GO:0005739	17393
TraesCS5A02G281700	0	0	0	0.566688	0	0.603	OG0023358
TraesCS4A02G328100	0	0	0	0	0	0	OG0010254	GO:0005488,GO:0005768,GO:0005783,GO:0005794
TraesCS6A02G212900	0	0	0	0	0	0	OG0000011	GO:0005488
TraesCS5D02G196200	1.34713	1.84342	1.30419	0.597162	0.890973	0.435167	OG0006417		1747
TraesCS2A02G038100	0	0	0	0	0	0	OG0029122	GO:0005618
TraesCS3B02G559000	0	0	0	0	0	0	OG0024767	GO:0005783
TraesCS2B02G291600	1.94428	2.13618	1.75608	4.99557	2.20296	4.18993	OG0003804	GO:0005198,GO:0005739	401
TraesCS3D02G398500	0.0415963	0.0123487	0.0283704	0.0559219	0.122743	0.251662	OG0045650
TraesCS2D02G275300	0.677038	0.483876	0.300684	0.944272	0.543631	0.962953	OG0009651	GO:0003723,GO:0005634	8432
TraesCS1B02G011700	0	0	0	0	0	0	OG0003905	GO:0005488
TraesCS1A02G342000	0	0.0368485	0.0442119	0.223516	0.0446266	0.422848	OG0045139	GO:0005576
TraesCS6A02G407700	2.70495	1.66895	3.2278	4.60698	3.92779	4.65763	OG0029379	GO:0005488	3405
TraesCS2B02G610500	0.101641	0.102037	0.180746	0.164921	0.0399131	0.0767252	OG0020684
TraesCS2A02G530200	0	0	0	0	0	0	OG0013352
TraesCS5B02G440000	0	0	0	0	0	0	OG0001254
TraesCS1B02G437100	2.4166	2.36066	3.50497	1.87231	5.01565	1.0873	OG0000496	GO:0005488	5
TraesCS3D02G405100	0	0	0	0	0	0	OG0000345	GO:0003676
TraesCS6B02G247800	6.44418	3.96254	6.09862	5.94369	4.51045	5.38368	OG0005791	GO:0005737	1006
TraesCS6A02G411100	2.37173	1.64851	2.33962	4.29424	2.74997	4.37229	OG0005295		16979
TraesCS4A02G033700	0	0	0	0	0	0	OG0001428
TraesCS6B02G231700	1.78954	1.35836	1.90116	1.98027	2.17381	2.02912	OG0016749	GO:0005576,GO:0005634,GO:0005737	455
TraesCS3A02G333700	1.73921	1.74357	1.34254	2.97324	2.32047	3.61212	OG0015909	GO:0005634	2074
TraesCS7B02G396900	0	0	0	0	0	0	OG0004271
TraesCS3D02G407500	0.28325	0.215066	0.204105	0.843575	0.429445	1.10385	OG0004332		4
TraesCS3A02G080400	0	0	0	0	0	0	OG0013319
TraesCS6D02G109000	20.9803	18.2457	25.5658	32.6262	38.6972	46.9523	OG0002333	GO:0005634	0
TraesCS1D02G111600	0.554371	1.31348	0.230699	2.67221	0.370155	0.594008	OG0015723	GO:0005794	5517
TraesCS5D02G263100	0	0	0	0	0	0	OG0047357	GO:0005737
TraesCS5A02G430900	0	0	0	0	0	0	OG0014560	GO:0003824,GO:0005737
TraesCS4B02G272400	3.21078	2.63216	3.07048	3.44257	5.69245	2.06239	OG0014708		1310
TraesCS6B02G064700	0	0	0	0	0	0.103159	OG0023523	GO:0005488
TraesCS5D02G535300	0	0.0199681	0	0.0289415	0	0	OG0017109
TraesCS4A02G002500	0	0	0	0	0	0	OG0055411	GO:0005737
TraesCS7D02G001100	2.09606	1.56813	2.28937	1.76168	1.96777	1.55643	OG0047082		392
TraesCS2B02G581400	0.0480595	0.163431	0.156082	0.116852	0.0471174	0.144673	OG0006075
TraesCS6B02G206800	4.09918	6.55243	4.82366	8.70465	8.13794	15.5931	OG0002970		3800
TraesCS5D02G215900	0	0	0	0	0	0	OG0000000
TraesCS5B02G316800	6.00176	6.27454	3.54499	2.31274	4.65647	1.47851	OG0013647		1
TraesCS3A02G311600	4.07279	2.72946	3.56045	5.10888	4.56151	6.69467	OG0000217	GO:0005634,GO:0005737	9418
TraesCS7B02G391200	1.17678	1.56579	1.93344	2.31147	2.42362	2.98204	OG0010734	GO:0005730,GO:0005737	19950
TraesCS6A02G378200	0.175718	0.161515	0.176811	0.610226	0.288676	0.650821	OG0050928	GO:0005622	757
TraesCS3D02G424000	0	0.00779633	0.0150942	0.0900077	0.0725249	0.422735	OG0005549	GO:0005794
TraesCS7B02G439000	0.0138307	0	0.0322513	0.0189257	0	0	OG0024518
TraesCS3D02G544700	0.0692547	0.144829	0.0606918	0.319136	0.260641	0.230983	OG0019126	GO:0005737
TraesCS7A02G226400	7.05127	6.19731	7.53716	9.1018	8.26727	11.2342	OG0058598		1023
TraesCS2D02G402300	0	0	0	0	0	0	OG0002054	GO:0005576,GO:0005737
TraesCS6B02G470100	0.902173	0.605259	0.729769	0.684024	0.894205	0.452235	OG0029363		2524
TraesCS3D02G535500	0	0	0	0	0	0	OG0021158	GO:0003677,GO:0005634
TraesCS2B02G282500	13.4971	13.0458	12.9806	14.9775	14.8235	13.7939	OG0011077	GO:0005634,GO:0005737,GO:0005773	1935
TraesCS7A02G321700	0.75115	0.725845	0.710461	1.00604	0.931898	1.3828	OG0012352	GO:0003677,GO:0005654,GO:0005737	18977
TraesCS5D02G079900	0	0	0	0	0	0	OG0000409	GO:0005198,GO:0005739
TraesCS7D02G402300	2.98214	4.46921	4.23663	4.61608	3.63459	3.65473	OG0004326		744
TraesCS5A02G480400	0.123015	0.0782293	0.142312	0.179245	0.112738	0.250956	OG0009828	GO:0003723,GO:0004518
TraesCS4D02G052200	0.463253	0.344684	0.351727	0.547055	0.30588	0.33973	OG0009770	GO:0005739	13012
TraesCS3D02G374900	0.308192	0.475886	0.214412	0.711153	0.773689	1.37221	OG0002894		2
TraesCS6D02G108400	1.48898	2.07684	1.46021	3.47949	1.09901	2.76541	OG0049143	GO:0005618,GO:0005739	17973
TraesCS3D02G540200	1.23916	1.19329	0.810236	0.311013	0.547055	0.373406	OG0001448	GO:0005634	11423
TraesCS6B02G082900	0.870932	0.450108	0.556214	0.784336	0.610812	0.829348	OG0054637		17098
TraesCS7B02G373500	0	0.0521722	0.101009	0.214304	0.242664	0.486283	OG0050512
TraesCS4B02G233400	5.05838	3.99878	4.38762	5.57353	4.70189	6.86193	OG0005529		12676
TraesCS3A02G128100	0	0	0	0	0	0	OG0004578
TraesCS7B02G208900	0.390483	0.398596	0.281628	0.850868	0.47659	4.76335	OG0056117		2
TraesCS6B02G014900	0.587197	0.542251	0.579371	0.450437	0.240518	0.526357	OG0058086	GO:0003676	17007
TraesCS6D02G186900	1.17774	1.06746	1.35861	1.40317	1.7047	3.28538	OG0051855	GO:0005739	875
TraesCS1D02G247300	1.41591	1.00198	1.11542	1.52557	1.44772	1.45741	OG0011337	GO:0000166,GO:0005739	5802
TraesCS6D02G330300	0	0	0	0	0	0	OG0004773	GO:0005198,GO:0005576
TraesCS7A02G277000	2.57332	2.30349	1.85799	3.11199	2.52143	3.04212	OG0002022	GO:0005783,GO:0005794	18868
TraesCS5B02G541800	0	0	0	0	0	0	OG0023492
TraesCS1A02G172800	1.79891	3.287	2.51264	1.98388	2.04799	0.899232	OG0004697		1
TraesCS6B02G277900	0.0117677	0	0	0.0197191	0	0.0792577	OG0019543	GO:0005618,GO:0005783
TraesCS3B02G306300	0	0	0	0	0	0	OG0007586	GO:0005215
TraesCS7A02G179700	0	0	0	0	0	0	OG0002194	GO:0005488
TraesCS3D02G409500	0	0	0.0319099	0.0770616	0.027606	0.0295174	OG0052429
TraesCS3B02G504600	0.0518207	0.091832	0.0238077	0.15144	0.0200192	0.15555	OG0000475
TraesCS1A02G445300	0	0	0	0	0	0	OG0000197	GO:0005622
TraesCS1B02G437500	0.522195	0.932349	0.700437	1.74659	0.323935	7.4195	OG0027324	GO:0005634	2
TraesCS4D02G331100	2.68796	2.15813	2.06089	4.44364	2.26443	3.76188	OG0001732		13491
TraesCS1B02G259700	0.0145722	0.0942984	0.0977164	0.081903	0.0858249	0.754592	OG0000166		938
TraesCS7A02G477400	0	0	0	0	0	0	OG0004733
TraesCS5B02G222300	0	0	0	0	0	0	OG0022987
TraesCS6D02G164400	0	0	0	0	0	0	OG0001868	GO:0005634
TraesCS3B02G005800	4.69945	5.83805	5.68335	7.34278	6.24148	7.68616	OG0019051	GO:0005488,GO:0005654	9768
TraesCS7A02G231000	0.615178	0.462389	0.469986	0.648551	0.824049	0.828754	OG0020481	GO:0005654	18784
TraesCS7B02G281200	0.432672	0.524729	0.352139	0.437017	0.436505	0.362383	OG0011478		629
TraesCS6D02G358200	1.16371	0.802195	1.03787	2.51822	1.05049	5.00049	OG0008015	GO:0000166,GO:0005739	0
TraesCS7A02G121300	0	0	0	0	0	0	OG0003532
TraesCS7A02G462900	0.755255	0.943577	1.06065	2.64318	1.01311	2.64874	OG0014629	GO:0005739	3411
TraesCS7A02G344200	0.435766	0.496686	0.497555	0.552093	0.118254	0.526263	OG0005253	GO:0003824	2928
TraesCSU02G089705	0.401859	0.263613	0.385234	0.298928	0.268242	0.503677	OG0000511	GO:0003723,GO:0004518,GO:0005739	20970
TraesCS5B02G200000	0	0.0676865	0.0777531	0.220121	0	0.840528	OG0006428	GO:0005634,GO:0005783
TraesCS4D02G168000	0.575512	0.520839	0.600917	0.632725	0.427491	0.767307	OG0000007		13209
TraesCS7D02G233900	13.284	11.4453	7.68419	7.43877	5.277	4.71156	OG0003513	GO:0005737	1
TraesCS3D02G246900	2.98696	2.35897	3.00148	2.46145	2.57582	2.61707	OG0002279		1634
TraesCS1D02G215800	3.88082	6.31448	4.9364	6.64293	7.16817	7.74493	OG0044469		2646
TraesCS2D02G272500	1.10312	0.896509	1.22166	1.64878	1.76733	1.81875	OG0014441		214
TraesCS2A02G558400	0	0	0	0	0	0	OG0028563	GO:0005618,GO:0005783
TraesCS4A02G175400	0	0	0	0	0	0.0203893	OG0003120	GO:0003723,GO:0005737
TraesCS7D02G204500	0	0	0.160712	0.0480524	0	0	OG0000339	GO:0005634
TraesCS3B02G566300	0	0	0	0	0	0	OG0001043	GO:0005634
TraesCS2D02G227400	0	0	0	0	0	0	OG0018546	GO:0005739,GO:0005783
TraesCS5D02G481200	4.49409	6.10466	9.72181	11.098	9.04947	12.0888	OG0015160	GO:0003677,GO:0005634	16170
TraesCS5A02G118800	5.01663	4.77326	6.73929	3.32523	11.9049	3.12586	OG0004005	GO:0005488,GO:0005622	3
TraesCS7A02G106700	0.100651	0.0850769	0.0403784	0.0881408	0.101667	0.172284	OG0006819	GO:0003677,GO:0005739
TraesCS1A02G081400	22.4284	18.2415	23.5439	22.0418	26.2027	16.2994	OG0011953	GO:0000166	881
TraesCS5A02G473500	0	0	0	0	0	0	OG0001973	GO:0005634
TraesCS6B02G142900	0	0	0	0	0	0	OG0015303	GO:0000166,GO:0003723,GO:0005634
TraesCS4A02G211600	3.46062	2.76033	4.95446	6.18755	7.11973	9.72963	OG0009263	GO:0005737	356
TraesCS3B02G247600	1.62343	1.30653	1.37781	2.7893	1.91762	3.4835	OG0011511	GO:0005634	4
TraesCS2B02G363000	6.62214	7.02296	5.27642	5.2877	7.89155	4.87423	OG0006683	GO:0005634	5
TraesCS5D02G352900	0	0	0	0	0	0	OG0027836
TraesCS3D02G278600	1.0293	1.015	1.02496	1.61592	1.48269	1.80361	OG0005563	GO:0005488	11047
TraesCS5B02G275300	1.68434	2.2177	1.56025	3.61377	2.23985	3.81724	OG0004916	GO:0005198,GO:0005488,GO:0005739	747
TraesCS2B02G289500	1.55663	1.12818	1.44211	1.87564	1.6151	2.28871	OG0009405	GO:0005794	7506
TraesCS7A02G424900	0	0	0	0	0	0	OG0003912	GO:0005488
TraesCS3B02G072600	0	0	0	0	0	0.600177	OG0047628
TraesCS2B02G295200	0.0273977	0	0	0.0180094	0	0	OG0009531	GO:0005773
TraesCS4A02G462000	0	0	0	0	0	0	OG0028307
TraesCS2A02G445100	0.17575	0.160981	0.069819	0.63351	0.329662	1.16681	OG0055624	GO:0000166,GO:0003676	0
TraesCS4A02G407000	10.2555	9.8891	15.7931	13.8574	20.5995	10.2801	OG0004775		396
TraesCS3B02G429900	0.294451	0.222331	0.138933	0.375882	0.203453	0.709454	OG0007573		740
TraesCS5B02G111000	0.979013	0.860176	0.996371	1.52391	1.24249	1.74489	OG0053618		3663
TraesCS6D02G208400	0	0	0	0	0	0	OG0004350	GO:0005654,GO:0005730
TraesCS2D02G456200	1.52683	1.41529	1.31965	2.4502	1.52396	3.12747	OG0014239	GO:0005622	13
TraesCS2A02G364100	1.35824	1.0285	1.2079	2.31549	1.02289	3.14551	OG0057863	GO:0005622,GO:0005634	1026
TraesCS7A02G411800	0.494227	0.352556	0.403846	0.527316	0.539273	0.521317	OG0014765		19140
TraesCS1B02G043200	0.277031	0.285875	0.427811	0.948968	0.15092	1.44818	OG0052798	GO:0005737	0
TraesCS1A02G056100	0.198534	0.22501	0.105936	0.239282	0.350974	0.546729	OG0002964	GO:0003677,GO:0005737	1136
TraesCS6D02G060900	0.314519	1.53815	0.654791	7.78746	1.30113	24.0631	OG0004115		0
TraesCS5D02G509100	1.48966	2.05167	1.79402	2.4079	1.62126	2.79193	OG0047504	GO:0005739	16212
TraesCS4A02G020400	3.46539	2.89269	3.67963	5.20228	4.0416	4.70595	OG0050588	GO:0005622,GO:0005730	11463
TraesCSU02G216900	0	0	0	0	0	0	OG0023247
TraesCS2A02G324600	0	0	0	0	0	0	OG0046788	GO:0005488
TraesCS2B02G460300	1.15335	0.633004	0.977562	2.01881	0.977584	1.52172	OG0012336		7787
TraesCS6B02G011300	0.164395	0.79437	0.0839222	1.46748	0	1.01638	OG0003729
TraesCS1A02G304000	0	0	0	0	0	0	OG0011448	GO:0003700,GO:0005634
TraesCS5D02G382100	0	0	0	0.179463	0	1.44774	OG0004334
TraesCS6A02G289700	1.0903	1.24727	0.983608	1.69982	1.02934	1.64749	OG0013022	GO:0000166,GO:0003676,GO:0003824,GO:0005654,GO:0005737	16777
TraesCS6A02G217800	0	0	0	0	0	0	OG0000384	GO:0003677,GO:0005634
TraesCS1D02G384300	0.604337	1.38886	0.485895	1.6943	0.198183	1.47874	OG0000232		6033
TraesCS6B02G176700	2.49549	2.33334	2.89569	3.52725	2.83954	3.13996	OG0002985	GO:0000166,GO:0003723	56
TraesCS2A02G229300	0.0473606	0.0591356	0.0282552	0.0680894	0.0540415	0.0954384	OG0010944	GO:0005768,GO:0005773
TraesCS1B02G238200	2.47612	1.93346	2.31796	2.46854	1.29453	3.55551	OG0005244	GO:0005634,GO:0005783	2519
TraesCS1A02G266100	0	0	0	0.0144118	0	0.133434	OG0004649	GO:0005576
TraesCS7B02G085100	0	0	0	0	0	0.0747594	OG0001203	GO:0003677,GO:0003682,GO:0003824,GO:0005654,GO:0005737
TraesCS4A02G140200	11.2877	10.2029	11.2957	6.23685	16.8472	4.78731	OG0010759		5
TraesCS6D02G390200	4.11615	4.4112	4.84142	6.00154	6.06301	7.18512	OG0016955	GO:0003677,GO:0005634,GO:0005737	18460
TraesCS5A02G344300	0	0	0	0	0	0	OG0023298	GO:0003824,GO:0005634
TraesCS3A02G090800	0.014611	0.0308202	0.0629506	0.0689605	0.0430266	0.0903878	OG0045460	GO:0003677,GO:0005634,GO:0005737
TraesCS4A02G057000	0	0	0	0	0	0	OG0001369	GO:0003677
TraesCS7D02G204600	0	0	0	0.048249	0	0	OG0000339	GO:0005634
TraesCS7B02G225700	1.15586	0.733557	0.76742	1.06639	0.560707	1.82415	OG0010018	GO:0003676	3848
TraesCS1B02G440800	8.87657	9.54651	6.99186	5.47917	7.12979	3.13531	OG0011401		1
TraesCS7A02G080200	0.0140215	0.0127554	0	0	0	0	OG0001164
TraesCS7A02G244400	4.33987	5.70656	5.23384	6.76491	6.56361	5.1188	OG0000971	GO:0005773	540
TraesCS3A02G002000	0	0.0178394	0	0	0.0461566	0	OG0004498	GO:0005634,GO:0005783,GO:0005794
TraesCS1D02G163300	0.29055	0.151873	0.26107	0.288186	0.213547	0.375267	OG0012466	GO:0005737
TraesCS3A02G057400	0.963905	1.21568	0.921192	1.66512	1.69357	1.77488	OG0020814	GO:0000166	8975
TraesCS6D02G359600	0.0440674	0	0	0	0	0	OG0051490
TraesCS3A02G228600	0	0	0	0.136076	0	0.901616	OG0019412	GO:0003700,GO:0005634
TraesCS2A02G256000	0.333334	0.333764	0.220386	0.310439	0.306009	0.469712	OG0010915	GO:0005739	6543
TraesCS4A02G358800	8.36372	7.0192	8.34265	12.67	8.39375	18.2329	OG0007061		4
TraesCS2D02G491900	0.385244	0.200708	0.322129	0.476706	0.332205	1.04549	OG0017787	GO:0005488	8780
TraesCS2B02G344000	0.588791	0.511942	0.655355	0.489307	0.417974	0.376968	OG0005076	GO:0003676,GO:0003700,GO:0005634	46
TraesCS1B02G370900	0.772102	0.780544	0.871949	0.883482	2.20934	1.06871	OG0002944	GO:0005773	3
TraesCS3B02G605200	0	0	0	0	0	0	OG0019291
TraesCS1D02G243100	0.730949	0.750972	0.758425	1.09849	0.810323	1.09823	OG0012107	GO:0005634	5795
TraesCS3B02G252600	7.23507	10.4043	5.29048	5.06343	5.66882	4.42918	OG0053347	GO:0003676,GO:0005739	11
TraesCS3D02G350900	0.242619	0.274898	0.150952	1.46303	0.163394	3.71784	OG0010143	GO:0005739,GO:0005783	0
TraesCS7D02G340800	0.394383	0.369576	0.277918	0.294523	0.339721	0.650847	OG0012983		1561
TraesCS4D02G366000	0.671893	0.746704	0.711132	1.09588	0.93397	1.0151	OG0020218	GO:0005634,GO:0005737	42
TraesCSU02G261600	0	0	0	0	0	0	OG0000314	GO:0000166,GO:0005576,GO:0005739,GO:0005783
TraesCS5D02G024400	0	0	0	0	0	0	OG0049902
TraesCS2D02G286300	0.00619589	0.0298493	0.0253035	0.350675	0.0121489	1.30983	OG0006732	GO:0003677,GO:0003700,GO:0005634	2
TraesCS3B02G194400	0	0	0	0	0	0	OG0056082
TraesCS3A02G071400	0	0	0	0	0	0	OG0003329	GO:0003677,GO:0005634,GO:0005768
TraesCS3B02G204800	0	0.00769747	0	0	0	0.0344318	OG0022653	GO:0003723,GO:0005634
TraesCS7D02G541200	0	0.0214645	0	0.0983654	0	0.038243	OG0048887
TraesCS2A02G310600	0	0	0	0	0	0	OG0000260	GO:0005634,GO:0005737
TraesCS5A02G341500	0	0	0	0	0	0	OG0004942
TraesCS2B02G346100	0	0	0	0	0	0	OG0024458
TraesCS6D02G278600	0.228279	0.152799	0.276509	0.449936	0.385286	0.92251	OG0002363	GO:0003723,GO:0005730	432
TraesCS1A02G247300	0	0	0.00910656	0	0.010497	0.0187001	OG0000704	GO:0003824,GO:0005576
TraesCS1D02G169400	0	0	0	0	0	0	OG0051889	GO:0005198,GO:0005488
TraesCS2D02G372300	4.24642	3.89483	3.99499	4.32642	4.34924	4.38331	OG0044951	GO:0005215,GO:0005764	381
TraesCS1A02G440100	0.732352	0.455858	0.462135	1.13445	0.337055	0.439708	OG0000034	GO:0003677,GO:0005794	4589
TraesCS6A02G299300	2.4518	2.53228	2.46578	3.70681	2.30594	4.26408	OG0012668	GO:0005488,GO:0005773,GO:0005783	2111
TraesCS7A02G435900	1.21763	1.14705	0.925799	2.10539	1.16859	1.98802	OG0005962	GO:0003677,GO:0005634	19168
TraesCS7D02G145200	0	0	0	0	0	0	OG0002186
TraesCS1D02G305700	0.0571165	0.16177	0.0431513	0.3829	0.0373312	0.929046	OG0002924	GO:0005576	126
TraesCS3B02G072300	0	0	0	0	0	0	OG0054274
TraesCS1D02G357200	1.84778	2.59384	1.71716	4.04381	1.87421	4.78118	OG0001811		5983
TraesCS2B02G517100	0	0	0	0	0	0	OG0001371	GO:0005634
TraesCS3D02G038300	0.103195	0.0987809	0.0453513	0.145501	0.0715118	0.2113	OG0011569	GO:0005764
TraesCS6B02G139100	0	0	0	0.0148694	0	0	OG0045597	GO:0005576
TraesCS4D02G190700	1.15286	1.1657	0.827743	1.29278	1.53003	1.20436	OG0019039		13256
TraesCS5D02G449400	1.06059	1.22568	0.778358	0.948555	0.719871	1.08935	OG0018528	GO:0005634	16137
TraesCS2A02G375800	1.6719	2.13253	1.08393	3.45519	0.809333	1.04279	OG0001918		1863
TraesCS6A02G235000	0.505168	0.305966	0.328934	0.824397	0.537194	0.75827	OG0050453	GO:0003677,GO:0003700,GO:0005634,GO:0005768	16686
TraesCS2D02G500100	0.030097	0.0431428	0.033916	0.0430645	0.0454399	0.0507651	OG0010588	GO:0005634,GO:0005794
TraesCS2B02G089500	0	0	0	0	0	0	OG0008487
TraesCS5D02G207300	0	0	0	0	0	0	OG0023980	GO:0003677,GO:0005634
TraesCS5D02G080000	0	0	0	0	0	0	OG0001222	GO:0005198,GO:0005739
TraesCS6D02G345300	0.0888656	0	0	0	0	0	OG0000094
TraesCS2B02G243600	0.969479	0.959124	0.988896	1.38411	1.1589	1.86605	OG0003457	GO:0003723,GO:0005730	7411
TraesCS7B02G274100	1.4633	1.02158	1.73504	3.1431	2.25214	4.86945	OG0002813	GO:0005739	0
TraesCS5B02G385400	0	0	0	0	0	0	OG0010307	GO:0005737
TraesCS2A02G489700	6.49617	6.83661	7.12469	10.4849	6.44113	13.2961	OG0002725	GO:0005488,GO:0005576,GO:0005773,GO:0005777	2832
TraesCS2B02G624100	2.01074	1.89961	1.72522	2.49689	2.26392	2.67836	OG0009328	GO:0003824,GO:0005576	8006
TraesCS3D02G424600	0	0	0	0	0	0	OG0024380	GO:0005634,GO:0005737
TraesCS5D02G350500	0	0	0	0	0	0	OG0006295	GO:0005515,GO:0005739
TraesCS2B02G566400	0	0	0	0.149671	0	1.52093	OG0002871
TraesCS6A02G147000	5.55627	6.51305	6.10674	8.88044	8.32458	9.11032	OG0013560		16515
TraesCS1D02G065600	0.0104168	0.00957369	0.00788215	0.00435441	0	0.0291182	OG0024351
TraesCS1D02G076600	2.86403	3.14428	3.4331	9.89875	5.42422	12.942	OG0000970		0
TraesCS7D02G208500	0	0	0	0.0816305	0	0.034764	OG0056983	GO:0005783
TraesCSU02G207400	0	0	0	0	0	0	OG0057341
TraesCS3A02G325400	5.02125	5.1508	5.68889	3.57844	5.3982	2.37573	OG0011859		898
TraesCS4A02G037800	0	0	0	0	0	0	OG0023616	GO:0005622
TraesCS5D02G297500	0	0	0	0	0	0	OG0017540
TraesCS5D02G069600	49.7971	39.8262	49.0154	48.4377	52.6885	53.1591	OG0003935		3586
TraesCS3B02G099500	0.0659665	0.0200443	0	0.184609	0	0	OG0004568	GO:0003723,GO:0004518,GO:0005739
TraesCS6A02G092000	0.34066	0.673176	0.592482	0.862368	0.298451	1.22669	OG0020954	GO:0003677,GO:0005634	16420
TraesCS7A02G098200	0	0	0	0	0	0	OG0001293
TraesCS2A02G430500	0.068335	0.105564	0.0756416	0.133535	0.0998822	0.398989	OG0009739		347
TraesCS7D02G264200	0.0271822	0.0483188	0	0	0	0	OG0022221	GO:0000166,GO:0005737
TraesCS2A02G549000	0.230785	0.234442	0.160207	0.230237	0.111638	0.356687	OG0003307	GO:0005739
TraesCS3B02G491100	0	0	0	0	0	0	OG0015750
TraesCS6B02G192800	0.437567	0.502653	0.591611	1.00589	0.755375	1.11532	OG0000860		17302
TraesCS3B02G504700	0	0	0	0	0	0	OG0000809	GO:0005488,GO:0005634,GO:0005737
TraesCS1A02G373200	0.126967	0.165493	0.489298	0.281736	0.278349	0.407516	OG0002294		687
TraesCS3B02G598000	0	0	0	0	0	0	OG0017349
TraesCS7D02G131700	0	0	0.05092	0.037647	0.110212	0.228304	OG0017134	GO:0005634
TraesCS1A02G012900	0.053033	0.0401374	0.183632	0.0281089	0.0644529	0.104372	OG0020706	GO:0005634,GO:0005777
TraesCS1A02G181900	2.00578	1.3951	2.00731	2.44532	2.15124	3.00963	OG0002168	GO:0005737	4192
TraesCS2D02G069400	0.850112	0.803637	1.06462	1.45955	1.18481	1.63994	OG0003971	GO:0005634	8083
TraesCS7D02G127000	0	0	0	0	0	0	OG0016717	GO:0003676,GO:0005634
TraesCS4B02G130800	2.02588	1.25481	1.6756	2.35893	2.21638	2.87759	OG0046910		12457
TraesCS3A02G046900	0.676738	0.938516	0.645877	0.356241	0.886945	0.276832	OG0057834	GO:0003677	1
TraesCS2D02G437400	0	0	0	0	0	0	OG0001550	GO:0005488,GO:0005576
TraesCS1B02G050800	0	0	0	0	0	0	OG0021063	GO:0005634
TraesCS7D02G254400	0.686194	0.631927	0.576834	1.25539	0.601916	2.36785	OG0049411	GO:0005634,GO:0005768,GO:0005773,GO:0005794	54
TraesCS2D02G525800	0.316414	0.700986	0.216435	0.631984	0.305927	1.15061	OG0003860		3073
TraesCS6B02G256900	7.44135	8.51745	6.51102	14.9544	8.20606	18.2578	OG0049231	GO:0003723,GO:0005198,GO:0005730,GO:0005773,GO:0005783	2710
TraesCS5A02G036600	0.0182328	0.0177176	0	0.029725	0.00893768	0.0196329	OG0017265
TraesCS2D02G514000	0.0810504	0.0305069	0.0366031	0.0417004	0.0462247	0.0676095	OG0003902
TraesCS4A02G405100	0	0	0	0.0293153	0	0.262458	OG0050098
TraesCS2D02G550300	0.125857	0.17932	0.106326	0.241732	0.239793	0.211116	OG0003307	GO:0005739
TraesCS5A02G116400	0	0	0	0	0	0	OG0051979	GO:0005198
TraesCS5B02G390700	0	0	0	0	0	0	OG0000069	GO:0005634,GO:0005739
TraesCS2B02G179700	0.772954	0.828987	0.568159	1.75786	0.756952	1.91054	OG0009977		7295
TraesCS1B02G444700	0	0.0544755	0	0.185289	0.136039	1.76652	OG0011935
TraesCS7B02G271151	0.0489375	0.0576803	0.051292	0.213007	0.130848	0.0388354	OG0018666
TraesCS4D02G265100	0	0.0438787	0	0.375861	0.0974103	2.80619	OG0018577
TraesCS5A02G532600	3.07709	3.33858	2.65949	2.26571	3.89758	1.05356	OG0007375		1
TraesCS4D02G126300	0	0	0	0	0	0	OG0006501	GO:0003824,GO:0005773
TraesCS7D02G444200	0	0	0.0197743	0	0	0	OG0011050
TraesCS3B02G149000	1.84098	1.62541	0.99762	1.0132	0.633805	0.371226	OG0007804	GO:0005576	47
TraesCS3B02G203500	0	0	0	0	0	0	OG0011183	GO:0003677
TraesCS1D02G064700	2.62329	3.39303	2.11571	3.94678	2.959	4.37471	OG0007802	GO:0005634	5435
TraesCS1D02G218500	0.987069	1.14821	1.18528	1.51872	1.59166	1.61471	OG0005884	GO:0003677,GO:0005737	918
TraesCS6D02G334800	0	0	0	0	0	0	OG0000757	GO:0004518,GO:0005634,GO:0005737
TraesCS7D02G297200	0.861992	0.582815	0.903736	1.07454	1.17891	1.32498	OG0012536	GO:0005634	3825
TraesCS4A02G390400	0.780508	0.735107	0.677322	1.63714	0.827282	2.16394	OG0010480	GO:0005634	62
TraesCS6D02G268100	0	0	0	0	0	0	OG0008471	GO:0003824,GO:0005634,GO:0005737
TraesCS2B02G402000	0.110439	0.438112	0.167311	0.294018	0.11087	0.298939	OG0014320	GO:0005198	242
TraesCS3B02G019500	6.04761	7.35814	6.21466	10.0978	6.84125	12.924	OG0004419		6
TraesCS7A02G158300	5.1342	7.84117	5.8977	13.8638	4.4592	11.289	OG0000012	GO:0003677,GO:0005634	3385
TraesCS4B02G389900	0	0	0	0	0	0	OG0003884	GO:0005488,GO:0005576,GO:0005764
TraesCS1B02G430900	0.349983	0.486337	0.5497	0.649369	0.227566	1.08463	OG0002673	GO:0003677,GO:0005634	5294
TraesCS5B02G132700	2.07752	1.49992	1.676	2.70314	1.6167	3.35472	OG0021156	GO:0005739	14630
TraesCS3D02G024100	1.26965	1.30391	1.60742	1.56025	1.60936	1.45971	OG0016755	GO:0004518	375
TraesCS3A02G263200	0.0173211	0.0336634	0	0.0750402	0	0.535324	OG0006562
TraesCS5A02G214500	0.42883	0.481451	0.42123	0.702729	0.263409	1.041	OG0012801	GO:0003723	13919
TraesCSU02G039100	0	0	0	0	0	0	OG0000641	GO:0003676
TraesCS1B02G421100	0	0	0	0	0	0	OG0055561	GO:0005783
TraesCS5A02G364200	0.0500255	0.08232	0.0233305	0.255391	0.0726305	1.22485	OG0023997		2
TraesCS3A02G469100	0	0	0	0	0	0	OG0001937
TraesCS1B02G166800	0.0332753	0.0185114	0.030406	0.0349232	0.0253171	0.0320706	OG0028565	GO:0005622,GO:0005634,GO:0005654,GO:0005737
TraesCS5A02G465800	0	0	0	0	0	0	OG0002930	GO:0000166
TraesCS4D02G071600	0	0	0	0	0	0	OG0003523	GO:0003677,GO:0005654,GO:0005773
TraesCS6A02G339600	0.732549	0.716457	0.825657	1.89725	1.01192	3.32629	OG0001268	GO:0003723,GO:0005576,GO:0005618,GO:0005737	402
TraesCS7B02G371200	0.0417869	0.01857	0.0913842	0.254405	0.233608	0.33919	OG0013069	GO:0005634
TraesCS7D02G432100	0	0	0	0	0	0	OG0001052
TraesCS1A02G301500	0.02989	0.0537574	0.0348497	0.040901	0.0586082	0.0875005	OG0019372	GO:0005634
TraesCS4A02G154600	0	0	0	0	0	0	OG0050787
TraesCS2B02G085700	0	0	0	0	0	0	OG0056458
TraesCS4B02G113000	0.282622	0.172531	0.0807299	0.297196	0.543319	0.27528	OG0013293		600
TraesCSU02G172400	0	0	0	0	0.103126	0.441064	OG0055263
TraesCS2D02G299800	1.02007	1.22887	1.31202	2.3235	1.46254	4.14142	OG0002609	GO:0005739	0
TraesCS1A02G123700	0	0	0	0	0	0	OG0007741	GO:0005488
TraesCS5B02G221000	1.56513	2.06994	1.47554	3.07294	1.7788	3.17017	OG0013298		14810
TraesCS1D02G000524	0	0	0	0	0	0	OG0050843
TraesCS2A02G546100	0	0	0	0	0	0	OG0001164
TraesCS1A02G112500	36.7061	44.9368	41.0687	77.1884	50.5115	128.904	OG0001351	GO:0003723,GO:0005198,GO:0005730,GO:0005739,GO:0005773	0
TraesCS2A02G488600	0	0	0	0	0.024844	0.0256283	OG0020501
TraesCS2B02G487100	0	0	0	0	0	0	OG0003915	GO:0003676
TraesCS6D02G090200	21.7458	20.9032	26.4022	66.1384	47.8952	125.492	OG0003665	GO:0005739,GO:0005773,GO:0005783	0
TraesCS2B02G574800	0.00964558	0.00726797	0	0.0108559	0.00568785	0.00831919	OG0045598	GO:0005737
TraesCS2B02G579400	0.0285901	0.0061033	0	0.0115069	0	0	OG0020521
TraesCS6B02G173700	0.182011	0	0	0.266153	0	1.6987	OG0016695
TraesCS3B02G014200	0	0	0	0	0	0	OG0022001
TraesCS1B02G471200	0.440929	0.18467	0.15948	0.562947	0.086876	0.721016	OG0003600		62
TraesCS2B02G010200	3.47967	3.17075	3.73308	3.59266	3.86009	3.00301	OG0005074	GO:0003723	5
TraesCS4A02G369400	0	0	0	0	0	0	OG0001185	GO:0003676,GO:0003824
TraesCS5A02G132100	3.7929	4.71579	4.19658	3.68688	3.26055	3.62453	OG0020761		13764
TraesCSU02G189700	0	0	0	0	0	0	OG0001125	GO:0005783
TraesCS3B02G449000	0.0901445	0.0808444	0.0482045	0.105263	0.0552271	0.070156	OG0020614	GO:0003677,GO:0005654,GO:0005737
TraesCS6A02G220200	4.13402	6.49318	7.70948	18.7537	5.47666	46.0704	OG0012850	GO:0005576,GO:0005773	0
TraesCS5D02G387000	14.0435	11.6661	20.2259	17.9791	34.492	17.132	OG0006868		93
TraesCS4B02G199800	0.0497963	0.052698	0.0908145	0.0654472	0.0721137	0	OG0001651	GO:0005737
TraesCS6A02G184800	0	0.0337502	0	0.0253835	0.0909991	0.034858	OG0000245
TraesCS7A02G181400	0.560801	0.594146	0.674819	0.801011	0.781082	1.0763	OG0018433	GO:0005794	18719
TraesCS7A02G438200	0.099246	0.184687	0.271509	0.191881	0.178254	0.219474	OG0006795	GO:0003723,GO:0004518,GO:0005739	19173
TraesCS7A02G439400	0	0	0	0	0	0	OG0004755	GO:0005618
TraesCS5D02G075800	1.46066	1.51999	1.03222	3.82742	3.76749	3.83393	OG0017939	GO:0005739	15455
TraesCS4B02G096100	0	0	0	0	0	0	OG0018089	GO:0005739,GO:0005794
TraesCS3A02G325100	0.16874	0.0406232	0.256716	0.824747	0.266062	1.3423	OG0050984	GO:0005576	53
TraesCS3A02G481600	0.266534	0.511968	0.120891	0.819599	0	1.70609	OG0003649	GO:0005576,GO:0005618,GO:0005773	73
TraesCS7B02G385600	0	0	0	0	0	0	OG0000082	GO:0005576,GO:0005618,GO:0005783
TraesCS4A02G183100	4.74194	5.44398	8.24818	9.4556	7.99065	13.2465	OG0002458	GO:0005794	53
TraesCS2D02G261100	0.128415	0.163987	0.215857	0.572676	0.245753	2.49091	OG0053504	GO:0005634,GO:0005739	2
TraesCS7A02G349400	1.41556	2.50107	6.11225	10.7795	5.7481	15.0217	OG0015323	GO:0003676,GO:0003824	0
TraesCS3D02G312400	0.184668	0.731664	0.125695	1.05685	0.265585	0.496477	OG0019184	GO:0005515,GO:0005737	2161
TraesCS2B02G477000	2.63213	2.76043	2.21811	6.18356	3.9448	5.51726	OG0009523	GO:0003774	927
TraesCS3D02G323900	0	0	0	0	0	0	OG0002904	GO:0005618,GO:0005773
TraesCS3A02G167400	0.853229	0.875896	0.625724	1.39122	0.568415	1.60179	OG0009847	GO:0004518,GO:0005730	124
TraesCS2B02G403600	0	0	0	0	0	0	OG0021384	GO:0005488,GO:0005576
TraesCS4B02G114600	5.70605	4.41901	7.31958	9.53417	8.07408	8.58299	OG0004896	GO:0003700,GO:0005634,GO:0005737	1448
TraesCS7D02G375700	2.31536	7.58711	5.29476	32.8962	2.10237	114.508	OG0000631		0
TraesCS7A02G512700	0	0	0	0	0	0	OG0001202	GO:0003723,GO:0005634,GO:0005737
TraesCS3A02G441500	0.220115	0.231599	0.183732	0.46171	0.237288	1.57844	OG0019475	GO:0005737	2
TraesCS4D02G277400	14.136	18.3252	9.2256	8.1652	9.94763	5.07771	OG0010854	GO:0005739,GO:0005777	1
TraesCS7D02G507300	1.2225	1.20984	1.04859	2.58132	1.60994	5.04536	OG0010652	GO:0005773	0
TraesCS2B02G482200	0	0	0	0	0	0	OG0000309
TraesCS7B02G200000	3.79846	3.50325	3.49988	3.73901	3.58922	3.61599	OG0019607	GO:0003676,GO:0005634	1
TraesCS2D02G497400	3.71094	3.52822	3.68288	5.27031	3.66091	6.11178	OG0047197		2775
TraesCS6D02G048900	0.00631562	0.00666105	0	0.00864217	0	0.0118679	OG0017775	GO:0005618
TraesCS6D02G112800	0.41086	1.02639	0.42932	2.22498	1.20645	8.13255	OG0021062	GO:0005737	0
TraesCS3A02G307500	1.22872	0.521554	1.05815	1.61301	1.24894	4.16061	OG0006050		0
TraesCS2D02G248100	0.379014	0.428154	0.564634	0.564925	0.231236	0.723813	OG0028808	GO:0005488	8378
TraesCS2B02G045400	3.04503	2.68887	2.35967	3.00369	3.08503	3.53509	OG0020863		7125
TraesCSU02G038100	0	0.023008	0.0286615	0.177028	0.0297647	0.0950526	OG0014156	GO:0000166,GO:0005773
TraesCS2B02G422000	3.93114	3.1715	2.99907	5.28848	3.66423	4.58017	OG0018258	GO:0003677,GO:0005634	7736
TraesCS3B02G501100	0	0	0	0	0	0	OG0025354
TraesCSU02G096600	0	0	0	0	0	0	OG0044382	GO:0005576,GO:0005739
TraesCS1D02G353200	0.0221403	0.0295173	0.0226048	0.0185503	0.0325996	0	OG0002972	GO:0000166,GO:0005737
TraesCS6B02G471100	0	0	0	0.0200147	0	0.159843	OG0058733
TraesCS2A02G272300	0	0	0	0	0	0.068441	OG0000211
TraesCS5D02G006800	0	0	0	0	0	0	OG0027828
TraesCS6B02G290700	0	0	0	0	0	0	OG0016802	GO:0005488,GO:0005622
TraesCS2D02G064800	0.00974237	0	0	0	0	0	OG0014949	GO:0005622
TraesCS4D02G187300	0	0	0	0	0	0.061053	OG0003380	GO:0000166,GO:0005783,GO:0005794
TraesCS2B02G597500	0.294284	0.36701	0.314798	0.396658	0.37196	0.702655	OG0007866	GO:0000166,GO:0005737	7970
TraesCS2D02G368400	1.86421	2.43566	2.01427	2.4456	1.40251	1.46015	OG0006635	GO:0005794	313
TraesCS2A02G112100	0	0	0	0	0	0	OG0047610
TraesCS4A02G454200	0	0	0	0	0	0	OG0020888	GO:0005488,GO:0005634
TraesCS1B02G160800	0.571514	0.769866	0.663361	1.15711	1.0984	2.24461	OG0012475	GO:0000003,GO:0005634	26
TraesCS2A02G100900	3.08788	3.18004	1.35789	3.11602	0.27074	1.87124	OG0015416		2731
TraesCS5D02G103500	0.824605	0.985015	1.1091	0.525684	1.98835	0.361602	OG0003984	GO:0005768	7
TraesCS2D02G486900	0	0.0564129	0	0.110983	0	0	OG0009551	GO:0005739,GO:0005783
TraesCS3D02G514400	0	0	0.0846222	0.495674	0.216322	2.42252	OG0002751		448
TraesCS6D02G180800	0.153992	0.403747	0.0863736	0.522563	0.204852	0.625291	OG0008068	GO:0003677,GO:0005634	18092
TraesCSU02G213600	0	0	0	0	0	0	OG0004812
TraesCS5A02G485000	0.0348724	0	0.0263998	0.0309436	0	0	OG0001444
TraesCS2B02G073100	3.41861	4.67534	3.94126	10.3111	3.43333	12.9364	OG0017522	GO:0005634	103
TraesCS1A02G260000	0.0137752	0.0643663	0.0461861	0.00887269	0	0.0334467	OG0004514	GO:0005654
TraesCS5B02G104000	0	0	0	0	0	0	OG0004808	GO:0005794
TraesCS2B02G549700	0	0	0	0	0	0	OG0001653
TraesCSU02G017700	0	0	0	0	0	0	OG0000175	GO:0004518,GO:0005576
TraesCS4D02G143500	0.0419462	0.163223	0.0432187	0.163954	0.12015	0.273574	OG0012907
TraesCS4D02G146700	0.81518	0.568478	0.397419	0.605944	0.431725	0.794338	OG0002020	GO:0005576,GO:0005773	13160
TraesCS7D02G459400	0.128142	0.0649228	0	0.163529	0.53117	0.14946	OG0004783	GO:0005634
TraesCS5D02G118000	9.33561	9.25725	9.49327	11.8585	11.154	17.7403	OG0006239	GO:0005634,GO:0005739	598
TraesCS3A02G197100	0	0	0	0	0	0	OG0046502	GO:0005488
TraesCS1A02G054500	0	0	0	0	0	0	OG0000009	GO:0003723,GO:0004518,GO:0005739
TraesCS7B02G156800	0.596648	0.475984	0.310075	1.2512	0.496947	1.61621	OG0053800		3816
TraesCS4B02G383200	0	0	0	0	0	0	OG0000367	GO:0003700,GO:0005634
TraesCS1B02G432400	3.25663	3.55988	2.11343	3.21702	1.33713	1.88731	OG0024549	GO:0003723,GO:0005737	16
TraesCS1A02G315900	0.936838	0.724198	0.754142	0.720068	0.85037	0.640484	OG0057753	GO:0003677	1627
TraesCS5A02G540400	0.507322	0.684747	0.148838	0.219857	0.28126	0.344466	OG0007052	GO:0005739	239
TraesCS3A02G060500	0.0369806	0.18631	0.0510308	0.524848	0.189605	0.80478	OG0013444	GO:0005634	958
TraesCS5D02G359500	0	0.0189221	0.014378	0.0235982	0.0165733	0	OG0000106
TraesCS4B02G231300	10.0321	8.19072	9.71867	7.93876	8.1807	5.18739	OG0004274	GO:0003677,GO:0003682	59
TraesCS4D02G040800	0.4399	0.307898	0.348477	0.149391	0	0.0599881	OG0011142	GO:0005737	3526
TraesCS5D02G166000	2.10064	2.22029	2.18653	2.93366	2.33122	2.90605	OG0002482	GO:0003824,GO:0005768,GO:0005773	15675
TraesCS3B02G084000	0	0.0443164	0.0608026	0	0.0194619	0	OG0000072
TraesCS1B02G410500	0	0	0	0	0	0	OG0023617
TraesCS4A02G499300	0	0.0236903	0	0	0	0.170687	OG0005284	GO:0005634,GO:0005737
TraesCS6B02G264800	0	0.0623371	0	0	0	0	OG0023888	GO:0003676
TraesCS3A02G296400	0	0.0353117	0.0780717	0	0.210101	1.31587	OG0003714	GO:0005773
TraesCS7A02G481300	0	0	0	0	0	0	OG0058140	GO:0005488
TraesCS5B02G174300	0.959245	1.34277	0.587301	2.10456	0.788061	1.56606	OG0000172	GO:0005634,GO:0005737	1526
TraesCS2B02G182000	0.0859773	0.247012	0.241009	3.15668	1.25041	11.7408	OG0003356	GO:0003824	0
TraesCS7A02G558700	0	0	0	0	0	0	OG0023165	GO:0005634
TraesCS6B02G000500	0	0	0	0	0	0	OG0001098	GO:0005730
TraesCS5A02G000400	0.160406	0.0880502	0.13729	0.0751096	0.131833	0	OG0000110	GO:0005198,GO:0005618,GO:0005634,GO:0005739
TraesCS6A02G075500	0	0	0	0	0	0	OG0000530
TraesCS6D02G402400	0	0	0	0	0	0	OG0024127	GO:0005622,GO:0005737
TraesCS5B02G315300	0	0	0	0.114317	0	0.655603	OG0006332	GO:0003723
TraesCS4A02G094400	4.48884	4.33094	4.05764	4.23079	2.04383	3.47609	OG0005263		1409
TraesCS7D02G198000	0	0.0100302	0	0	0	0.0267708	OG0028418
TraesCS2B02G573100	2.00819	1.00026	2.00981	1.02486	1.14617	1.28971	OG0000007	GO:0003676,GO:0003824,GO:0005737	46
TraesCS3B02G562500	0.0393449	0.0619861	0.0472381	0.115475	0.0487399	0.195065	OG0048886
TraesCS1D02G074900	0	0	0	0	0	0	OG0001462	GO:0005576
TraesCS4A02G300400	0.00760078	0.0581451	0.0332444	0.0495664	0.129724	0	OG0015519	GO:0005618,GO:0005783
TraesCS7A02G344800	0	0	0	0	0	0	OG0020892	GO:0005576
TraesCS2B02G562400	0	0	0	0	0	0	OG0023027	GO:0003677,GO:0003700,GO:0005634
TraesCS5D02G181100	1.26977	1.70161	1.1138	1.65101	1.40623	1.41183	OG0009116		109
TraesCS1B02G154800	1.61441	1.40099	1.51219	1.66094	1.93602	1.64215	OG0001254	GO:0003700	1675
TraesCS6B02G102500	0.01235	0	0	0.0159094	0	0.0258924	OG0004761
TraesCS5B02G349200	0.0866329	0.210425	0.0222442	0.463563	0.0280914	0	OG0045807
TraesCS3A02G366700	0	0	0	0	0	0	OG0021938	GO:0005634
TraesCS5A02G362600	0	0.0178738	0	0	0.0398884	0	OG0017722
TraesCS5A02G518200	0.857564	0.482686	0.2392	0.75733	0.136177	0.484292	OG0003119		14351
TraesCS5B02G034700	0	0	0	0.0244262	0	0.206909	OG0000380	GO:0005488
TraesCS1A02G152900	0.880204	0.754475	0.831886	1.02935	0.586698	1.04992	OG0052921	GO:0005739	4122
TraesCS7A02G487400	0.0991273	0.108888	0.170562	0.245351	0.224716	0.141613	OG0046375	GO:0005576,GO:0005739
TraesCS7A02G178300	7.65848	12.3986	0.468327	14.629	0	0.242585	OG0002339	GO:0005634	209
TraesCS1D02G192100	1.0284	0.816432	0.785585	1.15124	0.917825	1.25277	OG0011029	GO:0005634	5694
TraesCS7B02G348000	0.33549	0.436203	0.412406	0.104255	0.597944	0.200597	OG0024108		1885
TraesCS6A02G000100	0	0	0	0	0	0	OG0017828
TraesCS5D02G299500	1.00005	0.807605	0.995494	2.31979	2.15489	3.7886	OG0013013		0
TraesCS5A02G260800	0.0928578	0.0989628	0.140044	0.245241	0.188135	0.246783	OG0001459	GO:0003676,GO:0005622
TraesCS2B02G557300	0	0	0	0	0	0	OG0018297	GO:0003677,GO:0005634
TraesCS6D02G082600	1.72709	2.51406	2.37932	10.4601	4.40382	15.5423	OG0005483		0
TraesCS2A02G394500	0	0	0	0	0	0	OG0009669	GO:0005737
TraesCS5A02G063800	4.6506	3.33449	3.76165	2.44171	4.87502	1.69018	OG0002519		5
TraesCS5D02G251100	0	0	0	0	0	0	OG0020826	GO:0005576,GO:0005773
TraesCS3D02G165400	0.229984	0.199125	0	0.433521	0.303827	0.468556	OG0005623		10819
TraesCS4B02G263400	0.0500985	0	0.102299	0.0839501	0	0	OG0010436	GO:0005634
TraesCS2B02G562100	0.147054	0.159243	0.215367	0.427901	0.197458	0.43221	OG0009642	GO:0005515	165
TraesCS6D02G303100	0	0	0	0	0	0	OG0017185	GO:0005634
TraesCS4B02G182000	0	0	0	0	0	0	OG0053164	GO:0005783
TraesCS2D02G016300	0	0	0	0	0	0	OG0020592
TraesCS1A02G401000	0	0	0	0	0	0.00302278	OG0002512	GO:0005488
TraesCS7A02G067300	0	0	0	0	0	0	OG0029040	GO:0005488
TraesCS3B02G284600	2.23164	1.873	2.17513	3.77202	2.56891	8.3275	OG0005589		0
TraesCS1B02G318400	2.71873	2.15807	1.90521	3.37464	2.66413	6.36818	OG0011693	GO:0005773,GO:0005794	26
TraesCS4B02G210200	0	0.0698384	0	0	0	0	OG0024000	GO:0000166,GO:0003676,GO:0005634,GO:0005777
TraesCS4A02G010200	0	0	0	0	0	0	OG0017246	GO:0005634
TraesCS7D02G078400	0.0186087	0.0697633	0.0918534	0.0683178	0.030429	0.0280655	OG0017598	GO:0003676
TraesCS4D02G355500	0	0	0	0	0	0	OG0001904	GO:0005576
TraesCS6B02G197500	0.389238	0.293527	0.371659	0.500852	0.421653	0.648379	OG0002367	GO:0003677	140
TraesCS7A02G398500	1.07349	0.693255	0.705243	0.651189	1.05255	1.51516	OG0048747		19116
TraesCS3B02G322600	2.09328	1.65821	2.30973	2.6226	2.37932	3.08733	OG0016247	GO:0005634	10223
TraesCS5D02G289200	0	0	0	0	0	0	OG0023583
TraesCS7B02G097200	0	0	0	0	0	0	OG0023502
TraesCS2B02G392000	0	0	0	0.333647	0	0	OG0025524	GO:0005634,GO:0005737
TraesCS7A02G529000	13.6745	10.7388	36.0697	16.7885	15.8363	5.11842	OG0000271	GO:0005739,GO:0005783	386
TraesCS4A02G483400	0	0	0.0623489	0.0752856	0.0539395	0	OG0001614	GO:0000166
TraesCS4B02G093700	0.0162066	0	0	0.0208775	0	0	OG0001955	GO:0005634
TraesCS3B02G260500	0	0	0	0	0	0	OG0003683
TraesCS5A02G317200	0	0	0	0	0	0	OG0013475	GO:0005634
TraesCS5A02G485300	0.0474681	0	0	0.0302882	0	0.205164	OG0001444
TraesCS3A02G281300	4.66552	7.26067	5.2183	5.04118	4.45604	6.55566	OG0007584	GO:0005488	9364
TraesCS2A02G333300	0	0	0	0	0	0	OG0000345
TraesCS2D02G337700	0	0	0	0	0	0.0152048	OG0028227	GO:0003677,GO:0003824,GO:0005737
TraesCS2A02G186800	0.201186	0.225732	0.181674	0.218436	0.289683	0.370711	OG0000214	GO:0005739,GO:0005783,GO:0005794
TraesCS7B02G484400	0.0308126	0.176473	0.206619	0.185122	0.0604171	0.255216	OG0005792	GO:0005215,GO:0005576
TraesCS7B02G082300	0.560587	0.703559	0.519916	0.858533	0.807444	1.11522	OG0000948		19437
TraesCS7A02G116500	0	0	0	0	0	0	OG0000114
TraesCS7A02G035300	0	0	0	0	0	0	OG0020390	GO:0005576,GO:0005783,GO:0005794
TraesCS2A02G229800	2.12896	2.53797	1.6868	1.29962	1.56041	1.58224	OG0047647		43
TraesCS1A02G366400	8.99523	6.90347	8.50393	7.81078	9.09355	8.47367	OG0052216	GO:0003677,GO:0005634	4478
TraesCS3B02G146900	0.0159196	0.0801609	0.0681134	0.0761125	0.17859	0.111441	OG0015972	GO:0005783
TraesCS1D02G250700	1.45401	1.21686	1.46696	2.5951	2.0096	4.08604	OG0011943		890
TraesCS5D02G202700	10.8452	11.4698	9.60114	9.65372	4.26481	4.93079	OG0013743	GO:0005773,GO:0005783	1
TraesCS3B02G349100	2.7414	2.84206	2.65273	6.96812	3.99127	16.1407	OG0019302	GO:0005768	0
TraesCS1A02G296100	2.81772	2.35341	2.79333	3.31156	2.93105	2.85901	OG0015960		4383
TraesCS3A02G178600	0.0112263	0.0158981	0	0.0153619	0.0165298	0.0645078	OG0054962	GO:0005576
TraesCS6B02G238400	1.94929	2.99309	2.693	4.17978	1.58628	4.06167	OG0016772	GO:0003676,GO:0003824,GO:0005198,GO:0005730	2123
TraesCS6B02G398900	0	0	0	0	0	0	OG0000939	GO:0005488
TraesCS5A02G087300	1.13711	1.12013	1.05227	1.55323	0.977404	2.06125	OG0008626	GO:0003676,GO:0005634	13666
TraesCS5D02G475500	0	0	0	0	0	0	OG0000630
TraesCS2A02G398300	0	0.0212923	0.0558629	0.0308609	0	0	OG0000760	GO:0005634
TraesCS4D02G095700	0	0	0	0	0	0.0429224	OG0018149	GO:0003700,GO:0005634
TraesCS3B02G265700	23.8186	20.3685	27.7781	24.235	11.2752	39.3064	OG0058863	GO:0005739,GO:0005777	117
TraesCS1A02G233100	0.0914221	0.187375	0.0548115	0.101721	0.140907	0.112167	OG0002387	GO:0000003,GO:0005618
TraesCS3A02G417400	0	0	0	0.0126445	0	0	OG0001852	GO:0005634
TraesCS5B02G515800	1.23207	0.903723	1.16049	2.34391	1.44706	3.78906	OG0009922	GO:0005634	0
TraesCS1B02G108600	0	0	0	0	0	0.045574	OG0023659
TraesCS3B02G181200	0.026837	0.0195598	0.0663708	0.0249444	0.0104517	0.0785487	OG0016045	GO:0005622
TraesCS1A02G323000	0.0465426	0.0887109	0.142971	0.832127	0.487716	2.0527	OG0001565	GO:0005634	2410
TraesCS2A02G579200	0	0.0164744	0	0	0	0	OG0013198
TraesCS2D02G462100	0	0.0300505	0	0.0680429	0.0331476	0.339651	OG0004150	GO:0005768
TraesCS1A02G351800	0.290925	0.223769	0.0856025	0.292541	0.188088	0.464061	OG0019136	GO:0003723,GO:0004518,GO:0005739	4460
TraesCS4B02G054200	23.7518	22.7996	14.5535	38.4165	17.7994	38.0667	OG0000115	GO:0003677,GO:0005730	1569
TraesCS2B02G046900	0.854918	0.721926	0.47029	2.19555	2.17644	2.47673	OG0022027		2855
TraesCS7A02G229100	0	0	0	0	0	0	OG0003882
TraesCS2D02G175100	0.175017	0.118219	0.202938	0.186333	0.51579	0.164692	OG0002724	GO:0005634	8238
TraesCS5B02G073200	0.273186	0.179111	0.191078	0.34734	0.33779	0.475622	OG0049173	GO:0003824	14500
TraesCS2D02G083200	0	0	0	0	0	0	OG0002650	GO:0003676
TraesCS4B02G377300	0	0	0	0.599973	0	11.6758	OG0055273	GO:0005618
TraesCS3A02G470700	0	0	0	0	0	0	OG0006016	GO:0005634,GO:0005737
TraesCS7D02G286300	0	0	0	0	0	0	OG0000235
TraesCS1A02G109000	0.00508601	0.0321788	0.0110749	0.0105846	0.0613623	0	OG0004364	GO:0005576,GO:0005618,GO:0005773
TraesCS7A02G308300	0.770866	0.726867	0.512392	0.93339	1.06724	0.975015	OG0005672	GO:0000003,GO:0005634,GO:0005730	832
TraesCS1D02G283600	0.025231	0.0246265	0.00728147	0.00947319	0.010501	0.00747615	OG0023414	GO:0005622
TraesCS6D02G198600	1.50053	1.17714	1.67275	2.00377	1.92904	2.39727	OG0056518	GO:0005622,GO:0005737	1424
TraesCS2B02G415300	1.48682	1.33222	2.18122	1.47946	4.77086	1.35036	OG0014322	GO:0005622	3
TraesCS5B02G364800	0	0	0	0.0125149	0	0	OG0003151
TraesCS7D02G374000	0	0.00295949	0.00776456	0.018982	0	0	OG0001510	GO:0003723
TraesCS4A02G229900	0	0.0106045	0	0.0282559	0.0552135	0.586568	OG0028534
TraesCS3B02G593600	0	0	0	0	0	0	OG0020712	GO:0003676,GO:0005634
TraesCS7A02G240400	0.0225402	0.0438067	0.0460263	0.912837	0.110574	0.301055	OG0012341	GO:0005634	18800
TraesCS2B02G053300	0.0380001	0.0477609	0.1102	0.249331	0.0846372	0.966695	OG0029222		2
TraesCS2A02G551100	10.2304	9.10796	12.3212	6.00747	7.35453	6.09665	OG0000437	GO:0005634,GO:0005739	222
TraesCS7A02G557400	0	0	0	0.00547392	0	0.00751709	OG0000442	GO:0004518,GO:0005576,GO:0005634
TraesCS6A02G141700	0	0	0	0.0344368	0	0	OG0000018
TraesCS7D02G152300	0	0	0	5.4868	0.0408724	52.9114	OG0027612	GO:0005739
TraesCS3A02G527400	0	0	0	0	0	0	OG0002423	GO:0003676,GO:0005634
TraesCS1A02G092000	0	0	0	0.0659824	0	0	OG0023936	GO:0005737
TraesCS5B02G240700	1.56991	1.83547	0.993285	2.37854	0.428842	1.85077	OG0009178	GO:0000003,GO:0005488	14842
TraesCS1B02G245200	0	0.120164	0	0.176846	0	1.73455	OG0055946	GO:0003677,GO:0005634
TraesCS3A02G172800	0	0	0	0	0	0	OG0023948
TraesCS6A02G152900	0	0	0	0	0	0	OG0000011	GO:0005654,GO:0005737
TraesCS5B02G152200	0	0	0	0	0	0	OG0008141	GO:0003676,GO:0005783
TraesCS7B02G458400	0	0	0	0	0	0	OG0051119
TraesCS5D02G051200	1.26427	1.12756	1.17155	1.77533	1.5193	2.35051	OG0018115	GO:0005634	15411
TraesCS6D02G275600	0	0	0	0.056182	0	0	OG0009059	GO:0003824
TraesCS7A02G032700	0	0	0	0	0	0	OG0023842
TraesCS1A02G093500	0	0	0	0.07371	0.0528758	0.422284	OG0002332	GO:0005634
TraesCS6D02G258300	0	0	0	0	0	0.0904846	OG0016767
TraesCS3A02G065000	0.148575	0.218453	0.0843147	0.161164	0.0729426	0.0903241	OG0004793
TraesCS5D02G307800	1.09489	0.866713	0.978046	0.819522	1.1913	0.489013	OG0018397	GO:0005634	5
TraesCS6A02G202900	0.39215	0.570121	0.474634	0.776006	0.629328	0.815522	OG0002098		16624
TraesCS3D02G041800	0.0607389	0.331265	0.324594	2.69522	0.948046	7.67203	OG0012079	GO:0003700,GO:0005515,GO:0005634	0
TraesCS5D02G277800	0	0.0600364	0	0	0	0	OG0023424	GO:0004518,GO:0005576
TraesCS1B02G345100	0.715102	0.972883	0.956445	1.26397	1.05642	1.44011	OG0007727	GO:0005737	5172
TraesCS1A02G170300	0.587576	0.528327	0.456576	0.97321	0.544432	1.09028	OG0012410	GO:0003723	4166
TraesCS3D02G097600	4.62003	3.87947	3.30509	6.27016	5.30134	9.08413	OG0002942	GO:0005794	414
TraesCS3B02G323800	1.55784	1.42673	2.06321	1.54132	2.00258	2.15943	OG0007556	GO:0003700,GO:0005634,GO:0005737	10224
TraesCS2A02G179000	0.184564	0.500655	0.57588	1.64134	0.6923	3.17227	OG0000773	GO:0003723,GO:0005198	0
TraesCS6D02G397900	0.859533	0.717122	0.717305	1.16765	0.714687	1.0514	OG0003778		18479
TraesCS5B02G142200	0	0	0	0.03068	0.019762	0.134613	OG0016850	GO:0003700,GO:0005634
TraesCS7A02G218900	0	0	0	0	0	0	OG0000944
TraesCS1D02G014100	0	0	0	0	0	0	OG0046859	GO:0005773
TraesCS7B02G013000	1.94551	2.75217	2.37349	4.28077	1.97284	4.53776	OG0010285	GO:0005739	19349
TraesCS6B02G154300	0.119384	0.089799	0.145571	0.199092	0	0.545058	OG0000016		2289
TraesCS3B02G180700	0	0	0	0.208166	0	0	OG0013374
TraesCS7D02G374900	4.01143	3.83041	2.86557	5.34323	4.20726	7.9801	OG0010955	GO:0005576,GO:0005618,GO:0005634,GO:0005737	14
TraesCS5A02G364700	0	0	0	0.0144001	0	0.10243	OG0055401
TraesCS6D02G182300	3.2885	2.6974	3.85831	2.77801	4.56696	2.54866	OG0016946	GO:0005739	3
TraesCS5A02G053900	0.0160926	0.0914943	0.218385	0.566432	0.0378776	1.97376	OG0019570	GO:0005634	2
TraesCS2D02G405700	0.202426	0.156857	0.214755	0.228516	0.15892	0.422086	OG0009692	GO:0004518,GO:0005488,GO:0005634	8664
TraesCS5A02G121000	2.20171	1.94944	2.19435	3.21451	2.77329	4.01794	OG0002535	GO:0005739,GO:0005773	95
TraesCS4A02G323300	1.05334	0.731113	0.951731	0.915111	1.03629	0.99455	OG0017529		12018
TraesCS1A02G038600	0	0	0	0	0	0.00992302	OG0000825	GO:0005622
TraesCS3B02G226300	4.51967	4.01312	4.48083	6.08314	5.2534	8.82255	OG0052569	GO:0005515,GO:0005654	157
TraesCS5B02G238400	2.90584	3.06091	2.88747	4.07063	3.04587	4.78409	OG0004038	GO:0005739,GO:0005777	14839
TraesCS3B02G465200	0	0	0.0405938	0.288766	0	2.2383	OG0057810	GO:0005794
TraesCS2D02G196400	0	0	0	0	0	0.257447	OG0013426
TraesCS1D02G266500	29.1911	21.3779	26.8006	51.2503	32.966	88.619	OG0001485	GO:0003677,GO:0005634	0
TraesCS2A02G124600	0.542039	0.489232	0.479046	0.486771	0.711315	0.348313	OG0003014	GO:0000166,GO:0003723,GO:0005794	1824
TraesCS5D02G047400	0	0	0	0	0	0	OG0015483	GO:0003676,GO:0005654
TraesCS1B02G420000	0.256231	0.634911	0.235047	0.971147	0.795319	1.72783	OG0016700	GO:0005634,GO:0005737	133
TraesCS2A02G192000	0.959857	0.798511	0.758165	1.16137	0.943408	1.05077	OG0009747	GO:0000166,GO:0003676	617
TraesCS2A02G482000	0	0.0469296	0	0.0608874	0	0.186577	OG0001907
TraesCS1B02G344300	5.7941	5.1087	5.30018	5.03332	4.82511	3.32856	OG0028594	GO:0005634	1
TraesCS5A02G451300	0	0	0	0	0	0	OG0000827
TraesCS1B02G302800	0.210133	0.49715	0.335725	0.511975	0.291512	0.784974	OG0024511	GO:0000166	5099
TraesCS5A02G431300	0.42123	0.377999	0.154748	0.539232	0.102617	0.709681	OG0020925		14234
TraesCS7A02G181100	0.032223	0.0293136	0	0	0	0.0782385	OG0009026	GO:0003700
TraesCSU02G125100	0	0	0	0.122679	0	0.177758	OG0052416	GO:0005622
TraesCS6B02G375500	0	0.00456384	0	0.00347237	0.00747269	0.0700575	OG0012358	GO:0005634,GO:0005737
TraesCSU02G051900	0	0.0402995	0	0.0283743	0	0.0938203	OG0054995	GO:0005576,GO:0005618,GO:0005773
TraesCS5D02G011900	0	0.0100144	0	0.513218	0.153578	4.64088	OG0028153
TraesCS2D02G263600	0.164224	0.661186	0.294129	0.495952	0.0645547	1.80803	OG0018998	GO:0005618	2717
TraesCS5B02G094800	0	0	0	0	0	0	OG0013721	GO:0005634
TraesCS2B02G501000	0	0.0711399	0	0.219053	0	2.22718	OG0002014	GO:0005576,GO:0005783,GO:0005794
TraesCS3A02G487400	0	0	0	0	0	0	OG0000048	GO:0005768
TraesCS4B02G154700	15.1885	18.0909	13.9157	33.1279	15.5373	37.3846	OG0052587	GO:0005198	6
TraesCS5D02G158600	2.17512	2.8428	2.38778	5.13682	3.90291	6.10295	OG0008951	GO:0005730	1391
TraesCS7A02G329500	0.0116528	0.0876968	0.107167	0.325229	0.0800129	0.0901224	OG0000322	GO:0003676,GO:0005634,GO:0005737
TraesCS3D02G029800	0	0	0	0	0	0	OG0050201
TraesCS5B02G543400	0.184912	0.223718	0.120776	0.0924254	0.213361	0.153384	OG0003536	GO:0003676,GO:0003824,GO:0005634
TraesCS7B02G298900	0	0	0	0	0	0	OG0020097	GO:0005634
TraesCS2B02G212900	0	0	0	0	0.0752262	0.137659	OG0023773	GO:0003677,GO:0005634
TraesCSU02G257300	0	0	0	0	0	0	OG0008515
TraesCS3D02G409900	0.533763	0.349307	0.603875	0.729116	0.680981	0.463722	OG0007552	GO:0003676,GO:0004518,GO:0005737	11261
TraesCS5B02G247100	0	0	0	0	0	0	OG0000403
TraesCS4A02G166700	1.63952	1.85472	2.47946	6.9675	3.02418	14.6023	OG0005759		0
TraesCS2B02G464900	1.55583	1.61157	3.1797	5.18143	3.60196	4.16855	OG0009403	GO:0005773,GO:0005794	535
TraesCS7A02G008700	0.615833	0.596165	0.325666	1.04725	0.617434	0.630719	OG0010472	GO:0005634	18510
TraesCS3B02G210600	0	0	0	0	0	0	OG0000210	GO:0003676
TraesCS7A02G253100	0	0	0	0	0.045314	0.0220195	OG0045578	GO:0005488
TraesCS5D02G383600	0.126109	0.172542	0.105763	0.358694	0.0820885	0.411331	OG0007049	GO:0003723,GO:0005739
TraesCS5B02G068500	0.852192	1.41497	0.150381	0.59246	0.212476	0.104388	OG0015084		313
TraesCS4A02G329400	0.0106764	0.0148713	0.0112695	0.0486968	0.0431048	0.110291	OG0024211	GO:0000166,GO:0005576
TraesCS1A02G421100	0	0	0	0	0	0.275451	OG0012102
TraesCS5B02G220500	3.92165	3.08009	3.25649	3.6226	3.89966	4.16465	OG0009087	GO:0005576	14809
TraesCS1D02G252600	0	0	0	0	0	0	OG0000068	GO:0005618
TraesCS7A02G061500	0	0	0	0	0	0	OG0016841
TraesCS4A02G042200	0	0	0	0	0	0	OG0000182	GO:0005515,GO:0005739
TraesCS6B02G009700	0	0.087244	0	0.0137812	0.0197475	0	OG0023553
TraesCS3D02G396600	0.128865	0.060154	0	0.0942189	0	0	OG0017647	GO:0000003
TraesCS7D02G167100	0	0	0	0	0	0	OG0045292	GO:0000003,GO:0005634,GO:0005783,GO:0005794
TraesCS2D02G313000	0.864876	1.13842	0.774831	2.16398	1.32686	2.86974	OG0006601	GO:0005730	1078
TraesCS7A02G180200	0	0	0.0495022	0.0298867	0	0	OG0028090	GO:0005488,GO:0005634,GO:0005737
TraesCS6B02G000900	0	0	0	0	0	0	OG0012591	GO:0005576,GO:0005622
TraesCS7B02G493200	0	0	0	0	0	0	OG0051534	GO:0005737
TraesCS2B02G274200	14.8285	12.8329	16.8114	26.6774	19.1346	34.4249	OG0001173	GO:0005739,GO:0005773	4
TraesCS7D02G220600	0.0520949	0.0349986	0	0.0167773	0.0255368	0	OG0000943	GO:0003676
TraesCS3D02G462100	6.15288	4.67211	5.67727	8.03727	7.43972	8.82553	OG0052765		11324
TraesCS3B02G316100	0	0	0	0	0	0.0617787	OG0016351	GO:0005576,GO:0005768,GO:0005773
TraesCS2D02G295800	2.9258	1.83631	3.02786	1.56592	3.43186	1.40084	OG0028978	GO:0005739,GO:0005783	5
TraesCS2A02G569100	0	0	0	0	0	0	OG0000213
TraesCS7D02G131000	3.23833	3.36672	4.15524	4.70829	3.63738	5.26781	OG0007241	GO:0000166,GO:0005737	20228
TraesCS7D02G421500	11.3844	13.0613	11.269	8.13785	12.8263	4.41856	OG0014743		1
TraesCS4B02G266000	0.574681	0.691075	0.635213	0.988541	0.243097	0.662967	OG0009801		12750
TraesCS5D02G509300	0.201823	0.24551	0.275574	0.26453	0.0865478	0.21962	OG0003353	GO:0003676,GO:0005634,GO:0005739
TraesCS2B02G312700	0.0126722	0.0173685	0.0262271	0.0161716	0.0119361	0.0356405	OG0009517	GO:0003723,GO:0004518,GO:0005739
TraesCS3D02G153300	0	0	0	0	0	0	OG0000227	GO:0005618,GO:0005730,GO:0005794
TraesCS7B02G283700	0	0	0	0	0	0	OG0001299	GO:0003676
TraesCS7B02G023300	0	0	0	0	0	0	OG0058466	GO:0005576
TraesCS5A02G131700	0.0637223	0.089869	0.0914505	0.148652	0.116496	0.219827	OG0001960	GO:0003677,GO:0005730
TraesCS6A02G187800	3.20951	3.10461	2.68387	4.7478	3.57487	5.28603	OG0001195	GO:0005488,GO:0005622	1485
TraesCS2A02G371000	0.0248054	0.0320213	0	0.0786609	0	0.178952	OG0000247	GO:0005634,GO:0005739
TraesCS4A02G202100	0.0567092	0.0427499	0.0341369	0.0733532	0.0372983	0.3822	OG0001989		1139
TraesCS6A02G034600	0	0	0	0.0434478	0	0	OG0054456	GO:0003677,GO:0005730
TraesCS4A02G241000	0	0	0	0	0	0	OG0000149
TraesCS5D02G198400	0	0	0	0.204628	0	1.17252	OG0001876
TraesCS7A02G414400	0	0	0	0.0123213	0	0.0814812	OG0015328	GO:0005737
TraesCS5D02G146000	0	0.00801871	0.0327566	0.0433415	0.0551919	0.0369201	OG0004862	GO:0005634,GO:0005768
TraesCS4B02G035800	0.39809	0.239777	0.210857	0.322973	0.356638	0.664326	OG0018972	GO:0005215,GO:0005576,GO:0005634,GO:0005739	12285
TraesCS6B02G314200	0	0.0684184	0.198457	0.406507	0.737883	0.687349	OG0012238		140
TraesCS3D02G394900	0	0	0	0	0	0.00940219	OG0023933
TraesCS7A02G542400	0	0	0	0	0.227098	0	OG0000494	GO:0003676
TraesCS5A02G301000	1.79542	1.13973	1.65603	1.77166	1.93466	1.95009	OG0003730	GO:0003723,GO:0004518,GO:0005739	14042
TraesCS3B02G483000	0	0	0	0	0	0	OG0021003
TraesCS2A02G564000	4.22474	4.11373	4.05411	4.56888	2.05281	2.48575	OG0014265		649
TraesCS1B02G479500	0	0	0	0	0	0	OG0016251	GO:0005488
TraesCS6D02G323600	0	0	0	0	0	0	OG0028073	GO:0005737
TraesCS1A02G109300	0.681947	0.865605	0.662943	1.16652	0.880473	1.53432	OG0011497	GO:0003723,GO:0004518,GO:0005739	4046
TraesCS6B02G383600	0	0.0264567	0	0.15219	0.057025	0	OG0005981	GO:0005488,GO:0005783
TraesCS3A02G359700	0	0.0209523	0	0.077189	0	0.0559221	OG0001479	GO:0003824,GO:0005737
TraesCS5B02G056300	0	0.0189917	0	0.00488632	0	0.0131936	OG0008870
TraesCS6A02G071800	0	0	0	0	0	0	OG0054249	GO:0005488
TraesCS6D02G286800	0	0	0	0	0	0	OG0012236	GO:0003677,GO:0005634
TraesCS1A02G007000	1.90827	2.07936	1.0337	1.54735	0.617879	1.13145	OG0000087		3910
TraesCS2D02G159200	0	0	0	0	0	0	OG0047030
TraesCS1D02G037500	0.651766	0.531137	0.566735	0.543249	0.892424	0.609099	OG0057222	GO:0005622,GO:0005634,GO:0005737	619
TraesCS4D02G189900	2.90825	3.24546	3.00373	6.27883	2.76561	5.07684	OG0001307	GO:0003676	3551
TraesCS6B02G232500	0	0	0	0	0	0	OG0000278	GO:0005739
TraesCS6B02G425600	17.9345	14.3067	14.5872	9.59423	6.82337	3.76024	OG0012823		17
TraesCS2A02G125400	1.17409	0.880266	1.31467	0.820681	1.9081	0.645315	OG0001697	GO:0003824,GO:0005618,GO:0005737	3
TraesCS7D02G269400	0.0301207	0.0249445	0.0164519	0.670032	0.0131275	0.807567	OG0050925		2230
TraesCS7A02G116900	0	0	0	0	0	0	OG0000114
TraesCS4A02G108100	1.15109	1.47379	1.18776	2.13151	1.40674	2.1054	OG0010013		11631
TraesCS6A02G239400	11.0849	10.0972	12.7247	13.65	13.387	13.6667	OG0012356	GO:0005739,GO:0005794	16693
TraesCS1B02G345000	0	0	0	0	0	0	OG0001199	GO:0005488
TraesCS5A02G535400	0	0	0	0	0	0	OG0000486	GO:0005576,GO:0005618,GO:0005783
TraesCS3A02G040500	1.10165	1.2816	1.35598	1.38953	1.48124	1.04519	OG0017065	GO:0005739,GO:0005773	8962
TraesCS4A02G304300	0.442817	0.590766	0.475847	0.403281	0.772327	0.169495	OG0001348	GO:0005576,GO:0005618,GO:0005773	1532
TraesCS2D02G356800	0.788625	0.624715	0.861492	2.35019	1.66201	2.7648	OG0008085	GO:0005634,GO:0005783,GO:0005794	4
TraesCS3A02G206800	0	0	0	0	0	0	OG0046415
TraesCS7D02G356700	0	0	0	0	0	0	OG0001438
TraesCS7B02G175500	8.86946	8.00024	7.44474	10.1295	7.01601	11.5944	OG0045560	GO:0005773	1640
TraesCS2B02G187500	0.337817	0.204589	0.0844284	1.29863	0.315232	1.59046	OG0016942	GO:0003700,GO:0005634	341
TraesCS5B02G312100	0	0	0	0	0	0	OG0006032	GO:0003677,GO:0003700,GO:0005634
TraesCS3D02G077800	0	0	0	0	0	0	OG0019740	GO:0005730,GO:0005737
TraesCS3A02G078000	0	0	0	0	0	0	OG0006109
TraesCS1B02G164800	0.0826719	0.202651	0.15154	0.0953617	0.105208	0.497666	OG0019667	GO:0005622,GO:0005634	482
TraesCS6D02G041800	0.469528	0.258494	0.545033	0.578952	0.673212	0.409822	OG0000346	GO:0003677,GO:0005737	17878
TraesCS5B02G466300	0	0	0	0	0	0	OG0023536
TraesCS7D02G459000	0	0.00134797	0	0	0	0	OG0003007	GO:0005622
TraesCS2D02G262200	0.352063	0.396372	0.363349	0.622543	0.430858	0.571242	OG0010591		8409
TraesCS1D02G221200	0	0	0	0	0	0	OG0019594	GO:0000166,GO:0003676
TraesCS4A02G048900	0.317975	0.393989	0.611853	0.529471	0.734225	0.56708	OG0010884	GO:0005634,GO:0005739	11514
TraesCS3A02G019700	0	0	0	0	0	0	OG0006120	GO:0005634
TraesCS5B02G290400	0.596422	0.887661	0.576044	1.32873	0.845494	1.21651	OG0002618	GO:0003723,GO:0005730,GO:0005739	14916
TraesCS2B02G525400	0	0	0	0.00183399	0	0.00503708	OG0020912
TraesCS7B02G019000	0	0	0	0	0	0	OG0053346	GO:0003677,GO:0005634
TraesCS3A02G070000	0	0	0	0	0	0	OG0003217	GO:0005488,GO:0005576,GO:0005764
TraesCS5D02G464700	287.189	285.007	342.416	73.2529	39.6143	9.07869	OG0000062	GO:0005794	17
TraesCS5B02G213200	0.00607414	0.0056708	0	0.0166337	0.017185	0.00611743	OG0028408
TraesCS7A02G130500	2.96821	3.7282	4.38044	7.50414	4.44675	7.88242	OG0005309	GO:0005634,GO:0005773	10
TraesCS6B02G423800	0	0	0	0	0	0	OG0000237	GO:0005654,GO:0005737
TraesCS1D02G339100	0	0	0	0	0	0	OG0021087	GO:0003677,GO:0005215,GO:0005634
TraesCS3B02G601300	0	0	0	0	0	0	OG0057734	GO:0005794
TraesCS5A02G039400	0	0	0	0	0	0	OG0020944	GO:0005576
TraesCS3B02G574300	29.1336	25.7662	46.7505	14.5299	27.3875	7.37647	OG0044661		15
TraesCS6A02G335500	0	0	0	0	0	0	OG0016400	GO:0005634,GO:0005739
TraesCS2D02G215300	9.05558	9.42421	8.31091	11.4097	10.8057	13.4192	OG0007423	GO:0003677	1015
TraesCS7B02G392100	0	0	0	0	0	0.0355521	OG0004805
TraesCS1D02G324800	0	0	0	0	0	0	OG0002273
TraesCS6B02G105100	2.09542	1.87353	2.00116	2.65341	2.38316	2.46376	OG0004275	GO:0005622,GO:0005634	47
TraesCS7A02G103900	0	0.0595146	0.288498	0.17252	0.157608	0	OG0000012	GO:0003677,GO:0005634
TraesCS5B02G280500	0.130348	0.0665717	0.0691923	0.645698	0.0740362	0.149855	OG0013242	GO:0003676,GO:0005622	18
TraesCS3D02G172600	0.294539	0.324675	0.289237	1.49078	0.899548	3.73298	OG0007533	GO:0003676,GO:0004518	0
TraesCS5B02G016400	0.0105613	0.0206361	0.0123137	0.0566494	0.0103542	0.00992302	OG0015283
TraesCS4A02G028400	1.48111	1.64832	1.6709	2.24343	1.21594	2.7515	OG0010886		11476
TraesCS6D02G219100	0	0	0	0	0	0	OG0013801	GO:0005654,GO:0005783
TraesCS2D02G040500	0	0	0	0	0	0	OG0008588	GO:0005488
TraesCS1B02G434400	1.36633	2.69937	1.24841	0.895961	1.94306	0.712946	OG0016009		9
TraesCS1D02G119200	5.32829	6.2508	6.16354	6.76913	3.70148	6.87858	OG0001542	GO:0005622	5530
TraesCS2A02G336600	2.68358	2.53133	2.53526	2.46403	3.01912	1.51873	OG0001974	GO:0005773	1
TraesCS3B02G183300	40.6357	35.7209	59.04	85.5009	96.1106	97.4273	OG0005682	GO:0005515,GO:0005773	55
TraesCS2A02G303400	4.52495	5.97579	2.69671	5.5494	4.43955	6.90036	OG0014134	GO:0005739	2790
TraesCS6D02G185800	2.82617	3.12126	2.29678	5.99847	3.04347	9.01812	OG0008079	GO:0005634,GO:0005737	6
TraesCS7B02G106800	0.0637984	0.0224751	0.01729	0.031505	0.113204	0.0589164	OG0045341	GO:0005634
TraesCS2A02G245500	0.428732	0.417739	0.398367	0.538767	0.460314	0.639411	OG0010248	GO:0005198,GO:0005618,GO:0005634	6525
TraesCS7B02G042800	0.985934	0.87233	1.53512	0.881502	1.74105	0.66486	OG0004184	GO:0005488,GO:0005634,GO:0005773	1053
TraesCS3D02G139100	0	0.656842	0	10.1179	0	28.6997	OG0025425
TraesCS2D02G439100	0	0	0	0	0	0.0271967	OG0000286
TraesCS3B02G029300	0	0	0	0	0	0	OG0013285	GO:0005783,GO:0005794
TraesCS5B02G074400	6.04042	4.46966	4.44322	6.87971	3.33586	8.71901	OG0000669	GO:0005794	76
TraesCSU02G022000	0	0	0	0.0171595	0	0	OG0014339	GO:0005198
TraesCS4D02G029500	2.35826	2.04847	1.18665	1.9519	0.94085	1.88887	OG0001568		16
TraesCS2A02G413900	0.00514602	0.00468138	0.0116634	0.0172464	0.0121123	0	OG0009316	GO:0003677,GO:0005634
TraesCS6B02G266900	0.315321	0.452332	0.260037	0.246013	0.188189	0.264909	OG0049532	GO:0003723,GO:0004518,GO:0005739	3022
TraesCS5A02G355000	8.0003	12.5046	7.85657	8.92541	11.1703	3.20309	OG0003970	GO:0005739	1
TraesCS5D02G036000	0.66139	0.518426	0.961132	0.955499	0.260644	0.553915	OG0013257	GO:0003676	2099
TraesCS2B02G152700	0.862654	0.581452	0.780741	1.09508	0.740972	0.960627	OG0021766		7253
TraesCS3A02G412200	0.213373	0.0750144	0	0.399755	0	0.149116	OG0004718	GO:0005634,GO:0005737
TraesCS2D02G477278	0	0	0	0	0	0	OG0000009	GO:0005488
TraesCS2A02G547600	0	0	0	0	0	0	OG0014408
TraesCS5D02G349100	0	0	0	0	0	0	OG0027909
TraesCS3B02G215000	0.210339	0.271996	0.270396	0.196392	0.267854	0.273946	OG0015836	GO:0003676
TraesCS3A02G292300	0	0	0	0.0272031	0	0.588043	OG0000064
TraesCS2A02G128300	0.366041	0.372233	0.359731	0.565072	0.517394	0.661983	OG0015029	GO:0005768	1004
TraesCS7B02G488000	0	0	0	0	0	0	OG0001545	GO:0005739
TraesCS2B02G167000	2.41248	2.50348	2.69677	3.60726	3.62079	4.63971	OG0006905	GO:0005654	7271
TraesCS7B02G465800	0	0	0	0	0.0492964	0	OG0008499	GO:0003677,GO:0003824,GO:0005634,GO:0005737
TraesCS7D02G268200	0	0	0	0	0	0	OG0028752
TraesCS6D02G390700	0	0.386826	0	0	0	0.110759	OG0029379
TraesCS5A02G450100	0	0	0	0	0	0.0441741	OG0000240	GO:0000003,GO:0005488
TraesCS3B02G254200	0.474662	0.388768	0.26429	0.653102	0.243182	0.95939	OG0011715	GO:0005768,GO:0005783	338
TraesCS4B02G302400	2.93602	3.28175	2.56623	2.33684	3.78938	1.24582	OG0010152		1
TraesCS3B02G468500	0.792765	0.922244	1.39894	5.45031	1.86724	11.7396	OG0001463		0
TraesCS5B02G088700	6.67453	5.88005	6.89259	7.75081	7.88275	8.05801	OG0005247	GO:0005576	14529
TraesCS4D02G308500	2.05165	2.21087	2.06428	3.04775	1.73837	3.7834	OG0009805	GO:0005634	1083
TraesCS1D02G034700	3.87586	6.62848	2.23036	1.8841	0.568062	0.395239	OG0005602	GO:0005773	16
TraesCS3A02G154700	0.644533	0.79213	0.785048	1.43071	0.759284	1.80935	OG0004563	GO:0005634,GO:0005739,GO:0005777	9135
TraesCS6A02G180700	0.201459	0.0729575	0.140876	0.110975	0.0358001	0.0604702	OG0023451
TraesCS5B02G057900	0	0	0	0	0	0	OG0005018
TraesCS1D02G379300	0	0	0	0	0	0	OG0013023	GO:0005576,GO:0005737
TraesCS7D02G422700	0.744681	0.644111	0.796962	1.17515	0.74379	0.845045	OG0023441	GO:0005730	20713
TraesCS3D02G545800	0	0	0	0	0	0	OG0000846	GO:0005576
TraesCS2B02G134600	0	0	0.0314105	0	0	0	OG0017826	GO:0005488
TraesCS7A02G419900	2.0537	2.13902	1.78087	3.37645	2.53548	4.82698	OG0018473	GO:0005488,GO:0005794	289
TraesCS2A02G480700	0.339504	0.124537	0.0746471	0.304772	0.126179	0.112147	OG0000158	GO:0003676	1889
TraesCS6A02G119800	0.296853	0.391617	0.369077	0.639433	0.354601	0.916204	OG0002713	GO:0005634	16471
TraesCS2A02G220800	11.2361	9.55777	11.2032	12.7189	11.3205	11.3919	OG0027479	GO:0005488	6465
TraesCS1B02G384100	7.54111	6.85532	7.05714	7.17699	6.85651	7.14368	OG0003596	GO:0003677,GO:0005634	5239
TraesCS2D02G416900	0	0	0	0	0	0	OG0003955	GO:0005634,GO:0005737
TraesCS5D02G387400	1.7705	2.42175	1.32167	0.810382	1.26577	0.5041	OG0006264	GO:0003723,GO:0004518,GO:0005739	1
TraesCS2B02G238500	2.03273	2.80527	1.4758	1.97155	2.70647	1.25752	OG0011018	GO:0005739	1
TraesCS5A02G466700	1.95053	1.95769	2.27402	3.01931	2.87245	3.03907	OG0010141	GO:0005488,GO:0005634	14284
TraesCS5D02G469600	0.0289294	0.0520297	0	0.0791729	0.0567246	0.30656	OG0054002	GO:0003676
TraesCS5A02G478300	0	0	0	0	0	0	OG0000701	GO:0003676,GO:0005634,GO:0005739
TraesCS4D02G287800	0	0	0	0	0	0	OG0020554
TraesCS5D02G545800	0.642315	0.52906	0.375887	0.760167	0.388647	1.18111	OG0020275		2037
TraesCS4A02G335800	0	0	0	0.00455086	0	0.00569383	OG0006084	GO:0005622
TraesCS3A02G462400	0.781005	0.764361	0.538078	0.85151	0.624643	1.08144	OG0024492		9678
TraesCS6D02G128000	0.497194	0.459241	0.426023	0.557109	0.290187	0.560598	OG0003742		18002
TraesCS3A02G433700	0.108087	0	0	0.139238	0	0.524875	OG0002967	GO:0005488
TraesCS5A02G121600	9.52617	9.14246	9.92212	12.2211	11.6963	18.8077	OG0006239	GO:0005634,GO:0005739	113
TraesCS2B02G420600	0	0	0	0.0188308	0	0	OG0001690
TraesCS2A02G544900	0.153652	0.12613	0.0848277	0.16464	0.163778	0.175067	OG0003844	GO:0005737
TraesCSU02G143600	0	0	0	0	0	0	OG0004763	GO:0003676
TraesCS1D02G018400	1.38969	1.26186	1.5453	1.6723	1.45076	1.71962	OG0012302	GO:0003723,GO:0005634,GO:0005737	5381
TraesCS7B02G071500	1.40913	1.19494	0.979155	2.51332	1.71604	2.49618	OG0010489	GO:0005634	19422
TraesCS5B02G423900	0.015751	0.0902109	0.0356995	0.124269	0.0463838	0.0591966	OG0005499
TraesCS7D02G005500	0	0	0	0	0	0	OG0045245
TraesCS7A02G546600	0	0	0	0	0	0	OG0000782	GO:0003676
TraesCS7A02G165500	0	0.0235603	0	0.0611351	0	0.0542385	OG0006113	GO:0005622
TraesCS3B02G575900	0	0	0	0	0	0	OG0000936	GO:0005198,GO:0005576,GO:0005618
TraesCS2A02G033900	0	0	0	0	0	0	OG0000969
TraesCS1D02G420900	0	0.0316658	0.0272653	0.132373	0.0344323	0.276322	OG0000540
TraesCS4A02G209900	2.05814	1.91273	1.66463	3.90471	1.96798	5.47352	OG0001980	GO:0003700	176
TraesCS4A02G052800	0	0	0	0	0	0	OG0000323	GO:0003824,GO:0005634,GO:0005783
TraesCS6A02G400400	0.0160926	0	0	0.209495	0.0315543	0	OG0001695
TraesCS6A02G070300	0	0	0	0	0	0	OG0000213
TraesCS3B02G556200	0	0	0.0868877	0	0	0.0482338	OG0001291	GO:0005488
TraesCS4A02G018900	0.370265	0.350262	0.136158	0.538982	0	0	OG0027932	GO:0005737
TraesCS2A02G410200	0.117169	0.111663	0	0.29585	0.103682	0.216078	OG0054293		6820
TraesCS3D02G095800	0	0	0	0	0	0	OG0000347	GO:0005488
TraesCS3D02G529000	0	0	0	0	0	0	OG0005974
TraesCS4A02G066200	0.233188	0.441	0.423176	0.971149	1.20805	4.38559	OG0004888	GO:0005634,GO:0005773	2
TraesCS1B02G317200	0.279012	0.150049	0.237808	0.256161	0.327705	0.311473	OG0011618	GO:0005634	488
TraesCS6D02G384400	0	0	0	0	0	0	OG0003003
TraesCS7A02G026600	0	0	0	0	0	0	OG0008515
TraesCS1D02G214800	1.87159	1.48066	1.53159	1.17209	1.22149	0.635407	OG0012880	GO:0003676	732
TraesCS1D02G244000	0.226102	0.172577	0.191477	0.310272	0.179447	0.484119	OG0001171		426
TraesCSU02G205700	0	0.0427343	0	0.0364538	0	0	OG0001631	GO:0000166,GO:0003676,GO:0005730
TraesCS4A02G102600	0	0	0	0.417499	0	2.71916	OG0055600	GO:0005783
TraesCSU02G192500	0	0.0500523	0.0380326	0.161382	0.0365208	0.0349999	OG0001414
TraesCS5D02G537600	0	0.00314153	0	0.00444862	0.00812821	0	OG0018499	GO:0003677,GO:0005634
TraesCS1A02G372900	0	0.0454921	0.0340376	0	0	0	OG0016518	GO:0003700,GO:0005634
TraesCS3B02G303200	0.165942	0.60956	0.445929	1.76263	0.520021	2.42577	OG0003100	GO:0003676	4
TraesCS2A02G020500	0	0	0	0	0	0	OG0028731
TraesCS5D02G053500	0.720454	0.57395	1.21576	0.235325	1.07599	0.0640072	OG0008579		1136
TraesCS6D02G308300	0.0121317	0.0110363	0.0557857	0	0	0.084347	OG0017095
TraesCS3D02G327000	0.0893173	0.102845	0.156548	0.445149	0.0586012	0.484243	OG0058900		11127
TraesCS5A02G542500	0.0915147	0.0594266	0.0885351	0.197075	0.0551191	0.534578	OG0005356	GO:0005488	2
TraesCS3A02G539100	0	0	0	0	0	0	OG0003361
TraesCS5B02G428800	0	0	0	0	0	0	OG0021807
TraesCS1B02G196400	1.71941	1.83371	2.35965	4.23317	2.03663	7.35656	OG0007931	GO:0005634	33
TraesCS3A02G076200	3.32043	4.01479	3.01023	2.7066	2.85704	1.66859	OG0010857		1
TraesCS3A02G351200	3.46977	2.52817	3.60155	3.93318	3.32295	4.30935	OG0002940	GO:0003824	9494
TraesCS1D02G012500	0.0106783	0.0209766	0	0.0275119	0	0.020066	OG0056206
TraesCS1B02G170400	0.739661	0.603275	0.627622	0.493334	0.77889	0.434895	OG0016426		719
TraesCS4D02G244900	3.29407	3.73912	2.94968	7.14926	3.62597	8.87976	OG0051069	GO:0005783,GO:0005794	4
TraesCS5D02G087300	0.778151	0.767054	0.181119	0.338761	0.320735	0.300864	OG0024853	GO:0003676,GO:0003824,GO:0005654	234
TraesCS7D02G488800	0	0	0	0.0175154	0.0155186	0.0400354	OG0001600
TraesCS6A02G337600	0.0403439	0	0	0	0	0	OG0019739	GO:0005618
TraesCS2B02G504200	0	0	0	0	0	0.197019	OG0000173	GO:0000003,GO:0005576
TraesCS2B02G085800	0	0	0	0	0	0	OG0056348
TraesCS7A02G465200	0	0	0	0	0	0	OG0057803	GO:0005634
TraesCS2B02G009200	0	0	0	0.154192	0	0.245975	OG0052592
TraesCS1B02G201300	0	0	0	0	0	0	OG0005769
TraesCS1A02G220000	0.13228	0.123659	0.102924	0.0568594	0.116934	0.136526	OG0053801	GO:0003677,GO:0003700,GO:0005634
TraesCS2B02G063200	0	0	0	0	0	0	OG0020891	GO:0000003
TraesCS7D02G130605	0	0	0	0	0	0	OG0050621	GO:0005198,GO:0005618
TraesCS2A02G228600	1.15946	0.991297	1.12218	1.73435	1.50673	1.82784	OG0014506	GO:0000166	6483
TraesCS1A02G009500	0	0	0	0	0	0	OG0045773	GO:0005634,GO:0005794,GO:0003676
TraesCS3D02G306100	0	0	0	0	0	0	OG0015983
TraesCS1B02G091200	0	0	0	0	0	0	OG0007456	GO:0005634
TraesCS7D02G330300	0	0	0	0	0	0	OG0010133
TraesCS1D02G440900	11.1208	8.62028	11.7046	9.11394	4.16648	6.14653	OG0011187	GO:0003677,GO:0003700	343
TraesCS5A02G342300	0	0	0	0	0	0	OG0045944	GO:0005515,GO:0005739
TraesCS2D02G189600	0.520974	0.508312	0.54944	0.8187	0.550909	0.760626	OG0010694	GO:0003677,GO:0004518	8260
TraesCS2A02G512900	0	0	0	0	0	0	OG0003077	GO:0005634
TraesCS5A02G264700	0.220484	0.63679	0.493885	0.600227	0	0.302021	OG0045053		949
TraesCS7A02G478900	1.97997	1.21168	1.73305	1.32399	1.93346	1.74783	OG0027769		422
TraesCS1B02G139400	0.0205407	0.0195606	0.0161432	0.0193335	0	0.0336069	OG0001828	GO:0005739
TraesCS4B02G027800	3.88999	3.35642	3.89851	2.45402	4.82469	1.68352	OG0047480		5
TraesCS7A02G057700	0	0	0	0	0	0	OG0007166	GO:0003677,GO:0003700,GO:0005634
TraesCS1B02G320600	0.483694	0.284418	0.737692	0.434538	2.42015	2.00856	OG0001053		1712
TraesCS3B02G118700	0	0	0	0	0	0	OG0017765
TraesCS4A02G142300	0.388345	0.390335	0.451151	0.767257	0.418517	0.879881	OG0050522		11700
TraesCS3B02G530900	0.572493	0.569285	0.54798	0.872952	0.727254	1.06137	OG0005570	GO:0003677,GO:0003677,GO:0005739,GO:0004518	10517
TraesCS3B02G046900	0	0	0	0	0	0	OG0003682	GO:0005794
TraesCS1A02G100100	0.0528935	0.013968	0	0.0351829	0	0.190113	OG0048951	GO:0005634,GO:0005737
TraesCS2D02G010100	0.0163904	0.0149105	0	0.0947506	0.0321383	0.0995269	OG0057372
TraesCS3D02G238800	0.65886	0.618814	0.628977	1.05607	0.727634	1.4257	OG0058003	GO:0005198,GO:0005654,GO:0005739	298
TraesCS6A02G246400	26.5407	24.3092	24.0989	21.7108	30.3523	21.1464	OG0022152	GO:0005739	5
TraesCS7B02G141700	0.192075	0.157227	0	0.183477	0.0208569	0.204349	OG0016483	GO:0003723,GO:0004518,GO:0005739
TraesCS5A02G343000	0.166716	0.0882108	0.121306	0.137654	0.174915	0.421049	OG0020573	GO:0003824	2875
TraesCS3D02G304200	0	0	0	0	0	0.122466	OG0000190	GO:0005634,GO:0005737
TraesCS7B02G030900	0.650405	0.551496	0.617185	0.67824	0.605564	1.15455	OG0010659		19370
TraesCS2D02G012200	0.603118	0.568339	0.556495	0.74055	0.674394	0.778461	OG0005074	GO:0003723	8028
TraesCS4A02G413200	0	0	0	0.142307	0.0124813	0.217157	OG0028846	GO:0005634
TraesCS3B02G192400	180.236	156.485	98.3597	89.613	62.3214	42.1739	OG0005721	GO:0005773	16
TraesCS6A02G230100	0.0768475	0.0480093	0.0325279	0.26733	0.0785986	1.18804	OG0056663	GO:0005794	2
TraesCS3B02G015100	0	0	0	0	0	0	OG0002159	GO:0003723,GO:0004518,GO:0005739
TraesCS5A02G332800	1.11884	1.88173	1.84045	2.46372	2.468	2.16339	OG0001362	GO:0003677	14084
TraesCS2A02G289600	0.859762	0.859777	0.699946	0.94272	1.02051	1.20757	OG0009512	GO:0003677,GO:0005730	6615
TraesCS1A02G034900	0	0	0	0	0	0	OG0056361	GO:0005783,GO:0005794
TraesCS5A02G272900	3.24334	2.49022	2.84618	4.37797	2.74554	4.61931	OG0005295		14001
TraesCS5D02G087800	0.115508	0.115226	0.106004	0.251171	0.19339	0.350005	OG0001398	GO:0003676,GO:0005654	15476
TraesCS4A02G379200	0	0	0	0	0	0	OG0000466	GO:0003676,GO:0004518
TraesCS3B02G002400	0	0	0	0	0	0.0308179	OG0000229	GO:0003677
TraesCS5B02G135900	0	0	0	0	0	0	OG0000237	GO:0005654,GO:0005737
TraesCS7D02G170900	0.0369502	0.0664551	0	0	0	0.0897163	OG0014622	GO:0005634
TraesCS1D02G239400	0	0	0	0	0	0.0297262	OG0004420	GO:0005634,GO:0005773,GO:0005794
TraesCS6D02G277000	1.07247	1.21565	1.22584	1.99999	1.30235	1.82539	OG0012443	GO:0005488	18273
TraesCS2B02G530100	45.022	37.5284	73.03	13.0028	90.3746	4.4412	OG0018379		5
TraesCS7D02G524000	0.0549482	0.0798083	0.0686665	0.0747034	0.0784947	0.069243	OG0013806	GO:0005576,GO:0005764
TraesCS3D02G347700	1.46283	1.45699	1.04586	1.88196	1.48944	1.75534	OG0003702	GO:0005634	3349
TraesCS5B02G350800	0.0466289	0.103391	0.0588699	0.133897	0	0.0364802	OG0013711	GO:0005739
TraesCS1B02G055300	0	0.02172	0.0112888	0.00926393	0	0.0134231	OG0023410	GO:0003677
TraesCS3B02G568200	0	0	0	0	0	0	OG0000367	GO:0003700,GO:0005634
TraesCS6D02G277300	1.70974	1.75454	1.3199	3.4707	1.79217	5.99759	OG0008110	GO:0005488,GO:0005783	0
TraesCS1B02G138000	3.62437	3.79954	2.75398	2.94602	2.46359	1.87279	OG0057264	GO:0005488,GO:0005622,GO:0005730,GO:0005777	1
TraesCS6B02G278300	0	0	0	0	0	0	OG0016923	GO:0003677,GO:0005618,GO:0005634
TraesCS1B02G066300	0.0468077	0.0164895	0	0.0261986	0	0	OG0004579	GO:0005737
TraesCS2D02G305900	1.35227	1.12148	1.01735	2.12263	1.21284	3.967	OG0009356	GO:0005737	0
TraesCSU02G151200	0	0	0	0	0	0	OG0044966
TraesCS1D02G454300	0	0	0	0	0	0	OG0006631
TraesCS2B02G231300	1.21479	0.677393	1.12454	0.875885	0.939412	1.25549	OG0005583	GO:0003677,GO:0005730,GO:0005737	7387
TraesCS2D02G591100	0.174219	0.281011	0.169029	0.271188	0.32376	0.217459	OG0017639	GO:0003676	8903
TraesCS7A02G149600	0	0	0	0	0	0	OG0014564	GO:0003723,GO:0004518
TraesCS4D02G106000	0.387985	0.473532	0.393247	0.856903	0.476801	1.41659	OG0013848		0
TraesCS2D02G588200	0.194851	0.15273	0.0723278	1.19913	1.27182	1.59133	OG0014184		55
TraesCS2B02G375300	0.303739	0.366919	0.186731	0.416261	0.198346	0.504848	OG0009536		2925
TraesCS4B02G334400	0.250583	0.275178	0.123322	0.242881	0.156441	0.253728	OG0023480	GO:0003677,GO:0003824,GO:0005634	859
TraesCS1A02G112000	0.735513	0.70062	0.514724	1.26653	0.634807	1.65489	OG0012064		886
TraesCS6B02G380200	0	0	0	0	0	0	OG0000037	GO:0005488,GO:0005576,GO:0005764
TraesCS5A02G524300	5.39623	6.16715	4.63388	5.4561	3.8936	4.03773	OG0006763		1
TraesCS1A02G018000	1.20288	1.09932	1.19282	1.62697	0.888844	1.85919	OG0055910		3923
TraesCS6B02G266500	0.193558	0.222728	0.256582	0.776753	0.25846	1.15564	OG0044380		0
TraesCS4D02G016900	1.24233	1.13309	1.25428	2.21823	1.46299	2.5574	OG0001699	GO:0005768	0
TraesCS1A02G198700	0.879391	0.837199	0.936652	1.13043	1.01675	1.23225	OG0016903	GO:0003677,GO:0003824,GO:0005634	4235
TraesCS6D02G281600	0.117279	0.0593941	0.130833	0.356993	0.152835	0.82758	OG0016569	GO:0005773	2
TraesCS7B02G437700	0	0	0	0	0	0	OG0001794	GO:0005737
TraesCS1D02G399300	0	0.00695355	0	0	0	0	OG0049778
TraesCS2B02G508400	1.50182	2.02301	1.30324	1.51947	1.83535	0.779065	OG0000218		1
TraesCS3D02G001800	0	0	0	0	0	0	OG0001354	GO:0005634
TraesCS3D02G313800	1.90833	2.06811	1.56375	2.207	2.84154	2.76145	OG0021916		3345
TraesCS3B02G396400	0.508141	0.381783	0.168348	1.48973	0.194052	2.68501	OG0015574		99
TraesCS3A02G160400	0	0	0	0	0	0	OG0048896
TraesCS2D02G378900	0	0	0	0	0	0	OG0000163	GO:0003677,GO:0005634
TraesCS7A02G472200	0.627751	1.07764	0.77069	1.83115	0.654203	1.72377	OG0018735	GO:0005634	19227
TraesCS3A02G110100	0.0659665	0.0200443	0	0.0738438	0.0432036	0.0828087	OG0002127
TraesCS3A02G311100	0	0	0	0	0	0.18987	OG0017761	GO:0005576,GO:0005773,GO:0005783
TraesCS5A02G424000	0	0	0	0.136361	0.117276	0.533678	OG0004291
TraesCS4B02G283800	0.692686	0.442835	1.74024	19.4835	4.87559	27.3809	OG0014941	GO:0000166,GO:0003676	8
TraesCS2A02G242200	0	0	0	0	0	0	OG0001546	GO:0005739
TraesCS3A02G264400	0	0	0	0	0	0	OG0057164	GO:0003824
TraesCS7A02G089800	0.0233652	0.0317534	0.0211427	0.0587138	0.0306599	0.0334915	OG0002626
TraesCS4D02G246200	0	0	0	0	0	0	OG0000094
TraesCS3B02G008600	0.778428	0.9068	0.741468	2.60392	1.06897	3.86694	OG0016162	GO:0005198,GO:0005618	4
TraesCS3A02G174200	1.70348	1.90498	0.967011	2.24443	1.38817	2.75697	OG0001940		9173
TraesCS5A02G459300	0.614631	0.637364	0.429964	0.527459	0.31967	0.201093	OG0046445		2145
TraesCS7A02G537500	0	0	0	0.0962445	0	0.264691	OG0002406	GO:0005576
TraesCS3D02G328100	5.27651	6.03506	5.10968	4.5103	3.61181	3.0772	OG0016266	GO:0003723,GO:0005634	1
TraesCS3D02G262200	0.116727	0.177598	0.150211	1.45258	0.442333	4.15231	OG0016084		0
TraesCS6D02G355400	0	0	0	0	0	0	OG0005016	GO:0005634
TraesCS2A02G226200	0.635574	0.50237	0.447253	0.679534	0.647838	1.07295	OG0011103	GO:0003723	6476
TraesCS6D02G209500	9.52462	7.39058	9.30065	12.2736	10.2637	15.5903	OG0051032		720
TraesCS7B02G329600	0.0752562	0.172965	0.206306	0.120509	0.0369469	0.256051	OG0005242	GO:0003723,GO:0004518,GO:0005739	78
TraesCS1A02G198600	0	0	0	0	0	0	OG0046666	GO:0005768,GO:0005773,GO:0005794
TraesCS5D02G558100	0	0	0	0	0	0	OG0055541	GO:0005634,GO:0005773
TraesCS1D02G125500	1.39462	1.2008	0.931604	2.22656	1.43314	3.84532	OG0012515		0
TraesCS5B02G484600	0	0	0	0	0	0	OG0001491	GO:0005634
TraesCS7D02G288100	4.60218	4.27864	4.48391	5.7732	5.31092	9.04136	OG0058063	GO:0005739,GO:0005773	2
TraesCS3D02G298600	0.420498	0.786555	0.414075	4.83471	0.779299	18.1482	OG0001433	GO:0005618,GO:0005773	0
TraesCS7B02G289700	1.45906	1.22029	2.04434	2.38075	1.80952	2.44264	OG0011015	GO:0005622,GO:0005634,GO:0005737	19805
TraesCS1A02G365400	0.0380249	0.0570029	0	0.260313	0.0372795	0.44084	OG0013902	GO:0005794
TraesCS7B02G010300	0.536711	0.942042	0.454223	1.8406	0.867979	2.4529	OG0024097	GO:0005794	6
TraesCS5D02G336900	0	0	0	0	0	0	OG0001475
TraesCS2A02G043300	0.780693	0.49496	0.572633	0.643644	0.38602	0.480643	OG0045629	GO:0005488	6184
TraesCS7A02G090900	2.18389	2.47959	1.19885	2.64998	1.59672	3.02052	OG0001212		18604
TraesCS7A02G406600	0	0	0	0	0	0	OG0022621
TraesCS7B02G437500	0	0	0	0	0	0	OG0000141
TraesCS1D02G261300	0.064757	0.107771	0.0147023	0.247659	0.128516	0.1939	OG0012605	GO:0005618,GO:0005634,GO:0005773
TraesCS7A02G187400	0	0.162528	0	0	0	0	OG0008610	GO:0005488
TraesCS5B02G402600	0.242347	0	0.0803561	0.438101	0.182852	0.471557	OG0004788		1236
TraesCS6D02G388700	0.629958	1.16833	0.821561	0.944759	0.521794	1.37159	OG0008189	GO:0005634	18456
TraesCS7A02G240600	0	0.00736783	0.0158331	0.0185583	0	0.0292921	OG0003279	GO:0005622
TraesCS3D02G187500	0.00727644	0	0	0.0685319	0	0.502018	OG0000497	GO:0003824
TraesCS5D02G358400	0	0	0	0	0	0	OG0003085
TraesCS7B02G405600	0	0	0	0	0	0	OG0027877	GO:0005737
TraesCS1A02G413200	0.0258077	0.03494	0.0184492	0.0207483	0.0394754	0.0203838	OG0020968
TraesCS5D02G328300	9.17936	8.57136	8.19035	10.8461	6.67968	11.191	OG0013514	GO:0005634,GO:0005777	3250
TraesCS3A02G437800	0.273038	0.317963	0.345914	0.721377	0.37771	1.32773	OG0015882	GO:0005622	0
TraesCS4D02G240000	0.338046	0.199102	0.237214	0.462701	0.208552	0.414018	OG0003435	GO:0005635,GO:0005739	13367
TraesCS6D02G187400	1.11959	1.27124	1.22068	1.5722	1.38937	1.81822	OG0002098		18112
TraesCS6B02G400100	0	0	0	0	0	0	OG0001922
TraesCS3B02G177400	0.465538	0.466279	0.365325	0.564017	0.32125	0.974636	OG0050707	GO:0005739	3216
TraesCS7D02G547100	0	0	0	0	0	0	OG0005437
TraesCS5D02G164900	0	0	0	0	0	0	OG0000052	GO:0005634
TraesCS1D02G131100	0.268163	0.277354	0.235194	0.371987	0.309758	0.465369	OG0000393	GO:0005773,GO:0005783,GO:0005794
TraesCS7A02G452800	0	0	0	0	0.0127842	0.00910166	OG0008975	GO:0003677,GO:0005739
TraesCS3B02G278500	0.0363636	0.0108895	0	0.0159002	0.0258232	0.0224939	OG0003092
TraesCS1B02G381100	0	0	0	0	0	0	OG0021989	GO:0003677,GO:0003700,GO:0003824,GO:0005576,GO:0005634
TraesCS6A02G075100	0	0	0	0	0	0	OG0020868
TraesCS6B02G357900	0.0960321	0.0209445	0.0494868	0.0808532	0	0.0593121	OG0001152	GO:0003723,GO:0005634
TraesCS6A02G125600	0	0.0147216	0	0.0217454	0.0481499	0.124709	OG0000016
TraesCS1B02G319900	0	0	0	0	0	0	OG0013225
TraesCS5B02G490300	0	0	0	0.0745387	0	0.243504	OG0008447	GO:0003676,GO:0005634,GO:0005739
TraesCS7D02G389800	2.19242	1.52188	2.27338	2.47589	2.36114	2.62676	OG0019142		2735
TraesCS2B02G427600	0.73913	0.439596	0.561351	0.597031	0.362085	0.360327	OG0009692		7745
TraesCS1B02G081700	0	0	0.127409	0.0853807	0	0.11725	OG0023964
TraesCS1B02G023900	0	0	0	0	0	0	OG0002472
TraesCS7A02G279200	5.42477	4.67534	5.28108	7.67065	4.62591	8.43359	OG0020709	GO:0005102,GO:0005576,GO:0005739	18874
TraesCS2D02G189900	1.84111	1.35582	1.73781	1.45535	0.581471	1.64275	OG0001844	GO:0003677	468
TraesCS1B02G116800	0.0216942	0.0289226	0.0221493	0.0181765	0.0212689	0	OG0001465	GO:0003676
TraesCS7D02G093200	0.049556	0.0240779	0	0.0377131	0.0364833	0.119097	OG0011025	GO:0005488
TraesCS6D02G241600	0.104519	0.184597	0.0791494	0.233543	0.188878	0.294662	OG0008064	GO:0000166,GO:0003676
TraesCS2D02G557400	1.31943	1.28257	1.15005	1.95674	1.44544	2.59299	OG0006713	GO:0003824,GO:0005634,GO:0005739	901
TraesCS5B02G534900	0.264268	0.128278	0.174533	0.259314	0.273998	0.317293	OG0021146		1701
TraesCS2B02G096000	0.08765	0.114816	0.22811	0.364824	0.148591	0.658178	OG0050820		266
TraesCS2D02G522700	0	0	0	0	0	0	OG0000768
TraesCS3D02G043800	0	0.0065333	0	0.00797982	0	0.0246274	OG0016164
TraesCS7D02G291100	3.4868	3.18651	4.06396	5.05036	4.6068	5.25283	OG0008080		20502
TraesCS4D02G027400	0.426777	0.382698	0.462451	0.478377	0.419566	0.489259	OG0028712		12965
TraesCS7A02G114500	0	0.00885644	0	0	0	0	OG0000114	GO:0003824,GO:0005488
TraesCS3B02G224800	15.7527	13.5069	15.2534	20.0659	15.4568	22.337	OG0007672	GO:0005488,GO:0005773,GO:0005794	2751
TraesCS7B02G212900	0.00763192	0.00419088	0.0124139	0.0164732	0.00580858	0.0585111	OG0006212
TraesCS4B02G149900	0.739215	0.737894	0.608961	0.553616	0.622554	0.578109	OG0054143		12496
TraesCS7B02G107800	0	0	0	0.30936	0.093787	0.0748763	OG0000339	GO:0005634
TraesCS3B02G445300	0.272454	0.195047	0.276425	0.217133	0.0406123	0.204637	OG0000524
TraesCS1D02G230100	1.41799	1.12411	1.26674	1.71473	1.94144	3.0618	OG0007868	GO:0005773	2
TraesCS6A02G084400	1.1364	1.17929	1.45288	1.74242	1.54933	1.614	OG0008122	GO:0005576,GO:0005634	16397
TraesCS4A02G257700	2.44024	2.32518	1.98128	3.61953	1.57448	5.60867	OG0003566	GO:0005622	13
TraesCS3B02G412300	4.82019	4.21683	5.04633	5.90026	5.72671	8.0949	OG0005581	GO:0000166,GO:0003723,GO:0005634	10362
TraesCS5D02G561100	0	0	0	0	0	0	OG0023374
TraesCS2D02G339000	0	0.00682592	0	0	0	0	OG0014198
TraesCS2D02G595300	0	0	0	0	0	0	OG0017738
TraesCS7B02G030700	0.743818	0.600443	0.459303	1.09566	0.503662	1.35154	OG0028794		338
TraesCS4A02G212400	1.5438	1.39052	0.775356	1.47745	0.746931	1.32035	OG0057292	GO:0005737	41
TraesCS1A02G103500	0	0	0	0	0	0	OG0051120	GO:0005773,GO:0005783
TraesCS2B02G393200	0	0	0	0.0380833	0.0669264	0.10283	OG0021692	GO:0005737
TraesCS3A02G172400	0.0600575	0.113378	0.0241326	0.0755839	0.0278172	0.0495557	OG0002328	GO:0003677,GO:0005634
TraesCS2A02G175800	0.0157782	0.0140236	0.035761	0.0886812	0	0.0766197	OG0003886
TraesCS4D02G319800	0	0	0	0	0	0	OG0008422	GO:0003677,GO:0003682,GO:0005634
TraesCS6A02G142500	0	0	0	0	0	0	OG0029123
TraesCS3D02G531700	0.978555	0.810351	0.757653	0.97225	0.835956	1.02162	OG0028484		11412
TraesCS3B02G405200	0	0	0	0	0	0	OG0046483	GO:0005576,GO:0005618,GO:0005794
TraesCS2D02G453300	0.469105	0.212253	0.894073	0.740809	1.87653	1.65315	OG0000102		952
TraesCS7B02G286800	0.88664	0.622119	0.680413	0.973308	0.884669	1.3852	OG0009817		19800
TraesCS6B02G362800	7.03698	8.46941	7.11507	13.4588	5.25937	12.6969	OG0004402	GO:0005488,GO:0005634,GO:0005783	1591
TraesCS5A02G302600	0	0	0	0	0	0.135706	OG0000599	GO:0000166,GO:0005634
TraesCS4A02G285500	0	0	0	0	0	0	OG0000175	GO:0004518,GO:0005576
TraesCS6A02G204600	0.127435	0.224666	0.150111	0.143941	0.0447664	0.249673	OG0000522	GO:0005515
TraesCS3B02G223900	0.321362	0.254471	0.189583	0.325115	0.25069	0.347267	OG0003658	GO:0003774	41
TraesCS5A02G104600	0	0	0	0	0	0	OG0013865	GO:0005515
TraesCS4A02G299200	0.319302	0.349209	0.273408	0.313441	0.34077	0.548111	OG0009827	GO:0005634	11981
TraesCS1A02G069000	0	0	0	0	0	0	OG0000077	GO:0003824
TraesCS7A02G152800	4.02109	3.17914	3.8408	4.1753	4.619	3.21602	OG0002221	GO:0000166,GO:0003676,GO:0005730	46
TraesCS6D02G078500	0.795079	0.773502	0.525426	0.583326	0.557351	0.495477	OG0057865	GO:0005576,GO:0005777,GO:0005783	17921
TraesCS5D02G427300	0.109739	0	0	0.223157	0	0.303602	OG0001288
TraesCS1B02G013300	0	0	0	0	0	0	OG0007451
TraesCS5D02G492100	0.386677	0.595637	0.496414	1.05699	0.509744	0.853503	OG0005778	GO:0005622	16181
TraesCS5B02G534700	0	0	0	0	0	0.126488	OG0005527
TraesCS4D02G317900	1.65215	1.656	1.28075	4.17531	1.40237	4.10804	OG0058806		13
TraesCSU02G150900	0	0	0	0	0	0	OG0045497	GO:0005739,GO:0005783
TraesCS4D02G259200	0.147103	0.190017	0.166479	0.277175	0.0867804	0.281765	OG0005442	GO:0005634,GO:0005737
TraesCS3B02G117700	0.0474162	0.0566123	0.0484111	0.17583	0.137197	0.0719808	OG0005880
TraesCS5A02G335300	0	0	0	0	0	0	OG0004748
TraesCS5B02G013600	0.0436126	0.0905534	0.039746	0.117505	0.0393991	0.141363	OG0006313	GO:0005739
TraesCS5D02G459800	1.09723	0.717067	1.11291	1.42026	1.6714	0.980254	OG0004226	GO:0003677,GO:0003700,GO:0005634	16146
TraesCS2D02G579100	0	0.00665649	0.0298827	0.00942605	0	0	OG0027835
TraesCS1B02G285300	1.40089	1.16577	1.3042	2.31295	1.73056	3.7665	OG0055041		39
TraesCS2D02G252600	1.30255	1.32711	1.56203	6.53563	3.40977	39.45	OG0015439	GO:0005634	0
TraesCS5B02G337600	0	0.0160677	0.0182428	0.0631545	0.0350352	0.167612	OG0000750
TraesCS5D02G547500	0	0	0	0	0.0153192	0	OG0000065
TraesCS5D02G239400	1.16352	0.96141	1.00208	1.51933	1.25729	2.11582	OG0014011	GO:0005634	15802
TraesCS6D02G347000	0	0	0	0	0	0	OG0017656	GO:0005488
TraesCS2D02G432500	0	0	0	0.0296613	0	0	OG0018313
TraesCS4B02G256200	0	0.0736357	0.0427071	0.0831432	0.0554887	0.091502	OG0001528	GO:0003676,GO:0003824
TraesCS7D02G381000	7.38724	9.0417	10.8919	14.175	10.5663	13.6216	OG0005348	GO:0005634,GO:0005737	3602
TraesCS7D02G470300	3.93089	4.89964	4.26883	4.02924	4.84451	3.77024	OG0002049	GO:0003676,GO:0005634	69
TraesCS6D02G008600	1.76902	2.97596	1.53514	5.9267	0.0808752	1.33567	OG0027159		3773
TraesCS6D02G109800	24.3447	25.4345	29.9418	37.6157	34.0823	42.3422	OG0057011		4
TraesCS5A02G145300	0.200036	0.113963	0.177251	0.40261	0.214604	0.803141	OG0009115	GO:0003723,GO:0004518	664
TraesCS5B02G252500	1.34685	1.57043	1.30969	2.45049	2.01078	2.57506	OG0000975	GO:0005730,GO:0005737	14859
TraesCS1B02G117700	0	0	0	0	0	0	OG0006129	GO:0003677
TraesCS2B02G529400	3.62652	2.84932	3.02032	3.609	4.92244	5.10189	OG0002233	GO:0005634	7878
TraesCS1A02G199500	4.42971	3.61758	4.25222	4.95521	4.31153	5.61627	OG0005289	GO:0005730,GO:0005737	4236
TraesCSU02G180800	0	0	0	0	0	0	OG0018390
TraesCS2A02G260200	0.0249129	0	0	0	0	0	OG0058549	GO:0005783
TraesCS5D02G219300	0.0679971	0.0752882	0	9.14927	0.192141	24.4759	OG0013578	GO:0005634
TraesCS3B02G434500	0.00489202	0.00515958	0	0.0144995	0	0	OG0002622	GO:0005576,GO:0005764
TraesCS2D02G195700	0	0	0	0	0	0	OG0006112
TraesCS1A02G282600	0.0309341	0.0415646	0.0350559	0.769373	0	2.61799	OG0000411	GO:0005634
TraesCS7A02G158000	6.97482	6.40504	6.48742	8.3106	9.50002	10.6268	OG0000139	GO:0003677,GO:0003700,GO:0005634	1868
TraesCS2B02G447100	0	0	0	0	0.123319	0	OG0004854	GO:0003824
TraesCS4A02G108600	0	0	0	0	0	0.0144267	OG0014770
TraesCS6B02G105700	0.920659	0.844552	0.6641	1.21346	0.881286	1.34441	OG0008904	GO:0003723,GO:0005730	17130
TraesCS2A02G262700	3.6879	4.19763	2.76659	2.69772	3.36632	1.66174	OG0048374	GO:0005739	1
TraesCS7B02G314200	0	0	0	0	0	0	OG0001129	GO:0003677
TraesCS3B02G308800	2.4739	2.16395	3.08637	4.38566	3.65474	5.72967	OG0054904	GO:0005634,GO:0005737	4
TraesCS3D02G120500	6.31706	6.53291	5.87749	5.11333	6.99947	3.97444	OG0011297	GO:0003677	1
TraesCS7D02G414000	0.039133	0.0112863	0	0	0	0.0616644	OG0024347	GO:0000166,GO:0003676,GO:0005622
TraesCS4A02G126100	0.0896461	0.177688	0.142139	0.0846891	0.342324	0.253501	OG0006922	GO:0003723,GO:0004518,GO:0005739
TraesCS1B02G064400	0	0	0	0	0	0	OG0019179	GO:0005488
TraesCS1D02G332000	0	0	0	0	0	0	OG0017564
TraesCS7D02G214800	0.585542	0.46988	0.620233	0.681215	0.53144	0.731278	OG0015072		3895
TraesCS6D02G132400	5.61384	5.30255	4.90128	5.50387	6.2867	4.56493	OG0012160		1
TraesCS5A02G263600	0	0	0	0	0	0	OG0002017	GO:0005730
TraesCS6A02G064400	0	0	0	0	0	0	OG0000008	GO:0003824,GO:0005634
TraesCS4B02G065700	0.0435351	0.0129243	0	0.0573626	0.0627388	0.313004	OG0058674	GO:0000166,GO:0003824
TraesCS1B02G308700	0.0461458	0.124424	0.164127	0.153294	0.154367	0.175114	OG0004538	GO:0003723,GO:0004518,GO:0005739
TraesCS3A02G136500	8.80035	7.95131	8.15437	13.7371	8.95042	17.301	OG0000206	GO:0000003	4
TraesCS2B02G279900	0.140639	0.317011	0.35331	0.229072	0.445202	0.522503	OG0000007	GO:0003824,GO:0005737	222
TraesCS5B02G340700	0	0	0	0	0	0	OG0001842
TraesCS4A02G326700	0	0	0.032688	0	0	0	OG0000872
TraesCS4D02G055700	0.324583	0.397892	1.43555	2.05455	3.385	12.3987	OG0000332	GO:0005737	84
TraesCSU02G035300	0	0	0	0.16003	0	0	OG0046457
TraesCS7A02G082800	0	0	0	0	0	0	OG0023624
TraesCS4B02G250900	0.111108	0.3166	0.106365	0.698675	0.25717	2.85241	OG0002816	GO:0005488,GO:0005737	2
TraesCS4A02G363900	5.89572	6.26353	3.7612	5.05939	3.52238	4.13414	OG0000622	GO:0005730,GO:0005773	28
TraesCS7A02G271700	0	0	0	0	0	0	OG0001962	GO:0005634,GO:0005737
TraesCS6B02G356000	0.0268977	0.0449762	0.0246522	0.0679266	0.00873824	0.0692839	OG0048706	GO:0005618
TraesCS7A02G428500	0.0819671	0.170143	0.180135	0.237352	2.49853	0.227078	OG0051084		71
TraesCS1B02G358000	0	0	0	0	0	0	OG0021004	GO:0005634
TraesCS2B02G071200	0	0	0	0.0329912	0	0.031091	OG0057584
TraesCS1D02G009443	0	0	0	0	0	0	OG0020756	GO:0005576,GO:0005737
TraesCS6A02G047700	2.25623	1.75192	2.37897	5.98744	3.05565	7.89558	OG0012790	GO:0005783	4
TraesCS3A02G528700	1.14082	0.751323	1.06673	0.659109	1.6914	1.37331	OG0012059	GO:0005488	3
TraesCS2A02G376500	0.0869748	0.164999	0	0.379511	0	0.131309	OG0027899	GO:0003824
TraesCS2D02G147700	0	0	0	0	0	0	OG0028884	GO:0004518,GO:0005634
TraesCS2A02G022400	0	0	0	0	0	0	OG0000596
TraesCSU02G152671	0	0	0	0	0	0	OG0000314	GO:0005488
TraesCS4B02G150300	0.374276	0.345367	0.247994	0.364908	0.334273	0.402868	OG0007256	GO:0003677	12499
TraesCS5B02G384900	0	0	0	0	0	0	OG0005429	GO:0005634,GO:0005739
TraesCS6D02G328400	0	0	0	0	0	0	OG0003901
TraesCS6D02G077000	2.90723	3.51936	2.93344	9.18948	3.5111	37.3038	OG0005821	GO:0005635	0
TraesCS4A02G188000	0	0.0155073	0	0.00661675	0.0100714	0.0340088	OG0008689
TraesCS7D02G359000	1.21165	1.11522	1.51704	1.95337	3.0674	3.56876	OG0002207	GO:0005622	22
TraesCS2A02G587600	0	0	0	0	0	0	OG0023619
TraesCS5B02G355000	0.767507	0.695334	0.835048	0.91033	0.798061	0.989464	OG0006312	GO:0003677	15009
TraesCS7B02G071800	0.614847	0.531989	0.864029	0.882564	0.970129	0.429814	OG0018875		19423
TraesCS6B02G385800	0	0	0	0	0	0	OG0012116	GO:0005634
TraesCS6D02G299100	0	0	0.0436265	0.0275226	0	0.148543	OG0019844	GO:0003677,GO:0003700,GO:0005634
TraesCS3D02G347900	3.5887	3.12671	4.03164	2.21489	2.62176	1.54768	OG0002250	GO:0005622	467
TraesCS3B02G403800	0.153272	0.313562	0.307684	0.59413	0.425731	0.969236	OG0011974		19
TraesCS1A02G066200	0.0399642	0.0848171	0.132229	0.352946	0	0.294084	OG0011814		879
TraesCS2B02G044800	0.321003	0.223661	0.27786	0.536616	0.346259	0.731581	OG0013292	GO:0005488	7124
TraesCS1D02G139200	0	0	0	0	0	0	OG0005092	GO:0005576,GO:0005618
TraesCS5D02G068100	0	0	0	0.0881911	0	0	OG0004011	GO:0005634,GO:0005773
TraesCS6D02G329200	0	0	0	0	0	0	OG0016826	GO:0005488,GO:0005576
TraesCS3B02G297700	0.0713091	0.235149	0.236757	0.157324	0.0699112	0.161322	OG0001059	GO:0005634,GO:0005783,GO:0005794
TraesCS2D02G270300	0.0445034	0.0193812	0	1.2077	0.106894	0.429929	OG0005164	GO:0005634
TraesCS7D02G403400	2.77537	2.58495	3.04932	4.34785	4.42661	9.22201	OG0045252	GO:0005783,GO:0005794	0
TraesCS5D02G052300	0.118497	0.152698	0.0324787	0.119727	0.147792	0.170178	OG0048526	GO:0003700,GO:0005634
TraesCS4B02G128200	0.407346	0.350467	0.381675	0.461675	0.497116	0.631938	OG0013797	GO:0005515,GO:0005737	12451
TraesCS3D02G295800	0	0	0	0	0	0	OG0005457
TraesCS1A02G131200	2.40734	2.07489	2.24067	2.71533	2.71029	2.77359	OG0001254		1592
TraesCSU02G253200	0	0	0	0	0	0	OG0000149
TraesCS7D02G152700	0	0	0	0	0	0	OG0000369	GO:0003723,GO:0005634
TraesCS2A02G337300	15.6853	11.846	22.0652	27.6255	10.1984	47.9864	OG0000320	GO:0005618,GO:0005634,GO:0005739,GO:0005773,GO:0005794	33
TraesCS2D02G218000	11.3354	10.2295	10.4094	12.5505	9.67997	14.0733	OG0014813	GO:0005488,GO:0005773,GO:0005794	1734
TraesCS3D02G061700	0	0	0	0.954185	0.493274	4.74727	OG0045526
TraesCS4A02G150700	0	0	0	0	0	0	OG0049971
TraesCS7B02G114400	0.575298	0.607438	0.65389	0.544342	0.645143	0.712027	OG0010885	GO:0005739	3821
TraesCS7D02G260600	0.360497	0.532584	0.387897	1.0797	0.71758	1.80397	OG0016484		2801
TraesCS2B02G331100	0	0	0	0	0	0	OG0052713	GO:0000166,GO:0005198
TraesCS7A02G429300	3.30102	2.66128	4.77529	2.58694	1.57327	2.51709	OG0010470	GO:0005488	2980
TraesCS5A02G346900	0	0.0219654	0.0158362	0	0.0456763	0.0993265	OG0020445
TraesCS7D02G519200	0.28031	0.816189	0.877743	0.934601	1.87452	3.38081	OG0008428	GO:0003700,GO:0005634,GO:0005737	2
TraesCS5A02G010300	0.122953	0.207583	0.163574	0.252865	0.210102	0.20502	OG0003637	GO:0005488
TraesCS5B02G453400	0	0	0	0	0	0	OG0003891
TraesCS2A02G374500	0.886071	0.605654	0.575048	0.956221	0.830588	0.992391	OG0003302		6756
TraesCSU02G097800	0	0.0114404	0	0.0139733	0.0319427	0	OG0000793	GO:0003677,GO:0003682,GO:0005634
TraesCS6B02G258300	0	0.00217695	0	0	0	0	OG0016951	GO:0005488
TraesCS7A02G538800	0	0.00616366	0	0.0179995	0.0159475	0	OG0006040
TraesCS5A02G205900	0	0	0	0	0	0	OG0047787	GO:0005634,GO:0005794
TraesCS3B02G025800	0	0	0	0	0	0	OG0023661	GO:0005634
TraesCS6B02G425900	0.394604	0.419429	0.389693	0.515369	0.444785	0.714793	OG0012949		17729
TraesCS6B02G078100	1.8348	2.00417	1.50176	1.8468	1.99076	1.39882	OG0001305	GO:0003677,GO:0005794	393
TraesCS2A02G571300	0.214739	0.562812	0.260576	2.64991	0.0570954	1.77264	OG0008614	GO:0005576,GO:0005773	119
TraesCS7A02G125800	0	0.0344565	0.0868447	0.0321037	0.0901874	0.167017	OG0017554
TraesCS6A02G038900	0	0	0	0	0	0	OG0000490	GO:0003676
TraesCSU02G205300	0	0	0	0	0	0	OG0003841
TraesCS5D02G446200	0.210461	0.207654	0.178952	0.268986	0.379445	0.283568	OG0018865	GO:0005198	16132
TraesCS2B02G007800	1.42379	1.04983	1.39834	1.69042	1.60408	1.7697	OG0014469		7097
TraesCS7D02G404000	0.0641924	0.133406	0.0816426	0.148014	0.0500602	0.175335	OG0004198	GO:0003677,GO:0005634
TraesCS5D02G265900	0.0864999	0.0802105	0.111129	0.351499	0.234436	0.22184	OG0021221	GO:0005634
TraesCS1B02G092600	0.176285	0.202655	0.0504272	0.175879	0.316933	0.234564	OG0000009	GO:0003723,GO:0004518,GO:0005739
TraesCS3A02G134900	0.0530334	0.0118198	0.0294483	0.056289	0.0611635	0.29542	OG0001970	GO:0005773	9103
TraesCS4D02G010600	0	0	0	0	0	0	OG0005965	GO:0005576
TraesCS6B02G230200	2.40676	2.11053	2.21775	2.39451	2.13883	2.18857	OG0019717	GO:0000166	17385
TraesCS2D02G327900	0.0292923	0.017392	0.0656086	0	0.023029	0	OG0009621	GO:0005794
TraesCS5D02G237600	0	0	0	0.041557	0.0238272	0.0458031	OG0048610
TraesCS2D02G112700	5.08132	4.86037	5.21424	8.46049	7.5086	12.1307	OG0016456		54
TraesCS4A02G298700	2.98941	5.54347	2.81315	7.0398	5.58872	15.3826	OG0003927	GO:0005773,GO:0005777,GO:0005794	134
TraesCS7D02G229200	0	0	0	0.0369556	0	0.29776	OG0014890
TraesCS2B02G017100	0	0	0	0	0	0	OG0008510
TraesCS2B02G065300	0.155339	0.123008	0.0822564	0.178788	0.0701176	0.341588	OG0014391	GO:0003723,GO:0005634
TraesCS4D02G226300	0	0	0	0	0	0	OG0007314	GO:0003824
TraesCS1A02G107200	0	0	0	0	0	0.0103467	OG0050878	GO:0005739,GO:0005794
TraesCS3B02G240600	0.0470525	0.0647456	0.0408917	0.0612517	0.0560855	0.0528699	OG0046009	GO:0003677,GO:0005634
TraesCS5D02G356200	0	0	0	0	0	0.15641	OG0006438	GO:0005198
TraesCS5B02G289200	0.0353353	0.0798394	0.0773538	0.0814567	0.0959818	0.0286275	OG0006059
TraesCS5A02G074300	0.376757	0.699921	0.490005	0.585184	0.555148	0.358933	OG0047096		326
TraesCS6A02G225400	0.370151	0.427595	0.631878	0.796832	0.60013	1.00841	OG0000530		16670
TraesCS2B02G579600	0	0	0	0	0	0	OG0010935	GO:0003677
TraesCS4D02G308000	1.0792	0.665278	1.11241	1.42168	1.16479	1.77728	OG0005413	GO:0005634	13466
TraesCS5A02G105800	14.5193	18.7449	14.0749	28.3526	13.2417	40.0085	OG0001608	GO:0003677,GO:0005198,GO:0005634,GO:0005739	6
TraesCS1A02G245400	0.0887446	0.159969	0.231982	0.14071	0.154734	0.148197	OG0019708
TraesCS2A02G587800	0.0396989	0.0869384	0.0637722	0.267461	0.16574	0.606741	OG0010150	GO:0005488,GO:0005634	2
TraesCS1B02G223900	0	0	0	0	0	0	OG0004934	GO:0003676
TraesCS6A02G098400	0.535374	0.416958	0.356897	0.769877	0.757087	1.08736	OG0012283	GO:0003824,GO:0005488	16429
TraesCS6A02G398000	0.214797	0.448613	0.315818	0.637328	0.475959	0.539549	OG0012968	GO:0003774,GO:0005737	3515
TraesCS7A02G027900	1.58356	2.14117	1.40945	2.74194	1.05832	2.4978	OG0000751	GO:0003824,GO:0005198,GO:0005488,GO:0005739	714
TraesCS5D02G145300	4.88043	5.09848	6.26027	25.3495	8.4949	10.9652	OG0002014		15625
TraesCS2D02G047100	0	0	0	0	0	0	OG0009448
TraesCS5A02G167900	0.0539282	0.0477059	0	0	0.0174043	0.243029	OG0001629	GO:0005773
TraesCS6B02G157200	0	0	0.0689847	0	0	0	OG0017606
TraesCS4D02G163200	0.654577	0.556823	0.536053	0.818478	0.737	1.04154	OG0009000	GO:0003677,GO:0003824	13194
TraesCS5B02G424500	2.50604	2.20039	2.47643	2.86491	1.73343	3.17443	OG0006271	GO:0005794	68
TraesCS5B02G129900	0.15219	0.124833	0.224746	0	0.0589592	0.160409	OG0003168
TraesCS6D02G017800	0.465012	0.382177	0.374931	0.600362	0.621036	0.482945	OG0008391	GO:0003723,GO:0004518,GO:0005739	17835
TraesCS3D02G472300	0	0	0	0	0	0.0444394	OG0020497	GO:0000166
TraesCS5A02G185800	1.41336	1.39144	0.955327	1.42038	1.13326	1.80489	OG0006368	GO:0005739	13875
TraesCS3A02G165400	0	0.0251039	0	2.45025	0	13.4223	OG0001834	GO:0005737
TraesCS3D02G533400	0	0	0	0	0	0	OG0000937
TraesCS2A02G101100	0.087419	0.0940094	0.184707	0.374463	0.53718	0.90144	OG0003909	GO:0003677,GO:0003824,GO:0005634,GO:0005737	1307
TraesCS7D02G165500	1.07659	0.730327	0.973288	1.2822	1.20362	1.34951	OG0004415		20285
TraesCS1A02G392100	0	0	0	0	0	0	OG0016197	GO:0005634
TraesCS3D02G143800	0.0283909	0.0275887	0	0.074285	0	0	OG0017249	GO:0003723,GO:0004518,GO:0005739
TraesCS4D02G081200	0.678142	0.531177	0.594279	0.40462	0.645352	0.337244	OG0004954	GO:0003677,GO:0005634	292
TraesCS3B02G515800	0.72908	0.836551	0.820055	0.42094	0.675666	0.318528	OG0006024	GO:0003677,GO:0005634	1
TraesCS2B02G597400	0.259007	0.30575	0.158729	0.717048	0.284273	0.644937	OG0057446		7969
TraesCS5D02G120000	0	0	0	0	0	0	OG0000304
TraesCS6D02G315400	1.121	0.887753	0.799277	1.49339	0.88712	1.77531	OG0006913	GO:0003677,GO:0003682,GO:0005737	18341
TraesCS2B02G306600	1.04246	0.874929	1.49512	2.20652	0.979709	4.06033	OG0001352	GO:0005634	346
TraesCS3A02G523800	0	0.124676	0	0.0819219	0.128539	0.222037	OG0046840	GO:0003723,GO:0004518,GO:0005739
TraesCS7D02G279900	4.07402	4.1272	5.79689	9.35618	5.41167	23.2984	OG0005886	GO:0005488	0
TraesCS3D02G436700	0	0	0	0	0	0	OG0015586
TraesCS6D02G251200	0	0.0375978	0	0.127075	0	0.572011	OG0016802	GO:0005488,GO:0005622
TraesCS3A02G264200	0.530054	0.517966	0.370112	0.886909	1.17997	0.671565	OG0015659	GO:0005737	652
TraesCS7A02G403600	0	0	0	0	0	0	OG0004281
TraesCS4A02G407900	0	0	0	0	0	0	OG0007154
TraesCS3B02G393900	0	0.0186695	0	0.0287433	0	0.287518	OG0007823	GO:0005576,GO:0005783,GO:0005794
TraesCS6A02G376100	0	0	0	0	0	0	OG0021117
TraesCS7B02G267900	0.0120412	0.010954	0	0.0155116	0	0	OG0004708
TraesCS3A02G304700	0.0258918	0.0519264	0	0.0559795	0.012438	0.0252192	OG0012071	GO:0003723,GO:0004518,GO:0005739,GO:0005739
TraesCS5B02G445500	0	0.0128691	0	0.0166967	0	0.146923	OG0001184	GO:0005618
TraesCS4A02G142500	0.758801	0.613164	0.620702	0.870269	0.51954	0.837587	OG0013556	GO:0005634,GO:0005737	11701
TraesCS1D02G373900	0.247946	0.509751	0	0.334719	0.315545	0.585439	OG0001917	GO:0003677,GO:0005730	1289
TraesCS4B02G179800	1.52531	1.70863	1.35518	2.7017	1.99002	2.65912	OG0005300		1540
TraesCS5D02G316300	0.0609298	0.0824816	0.0876829	0.30187	0.0798097	0.0809108	OG0008741	GO:0003677,GO:0005634
TraesCS2D02G266000	2.92981	2.9062	3.26025	4.9627	3.4875	5.03105	OG0018685	GO:0005488,GO:0005634	1073
TraesCS3A02G380000	0.00688761	0	0	0.0534744	0.0135052	0	OG0056698	GO:0000166,GO:0003677
TraesCS2D02G442800	0.015694	0.0195756	0	0.0246907	0.0410302	0.0127018	OG0021830	GO:0003676,GO:0003700,GO:0005634
TraesCS1A02G335400	0	0.0166169	0.042594	0	0	0	OG0020325
TraesCS6D02G175300	0	0	0	0	0	0	OG0048814
TraesCS4D02G015800	5.39987	9.05192	6.5875	23.3944	1.78082	59.7777	OG0004356	GO:0005773	170
TraesCS3D02G502500	0.773773	0.858243	0.911516	1.32748	0.612691	1.23773	OG0005547	GO:0005737	11368
TraesCS2B02G156400	6.73668	6.23788	6.36406	10.3217	7.86944	14.2612	OG0006860	GO:0005634,GO:0005768	4
TraesCS2A02G405100	0	0	0	0	0	0	OG0002054	GO:0005576,GO:0005737
TraesCS7B02G271000	0	0	0	0	0	0	OG0000828
TraesCS5A02G108400	37.4648	27.2847	26.5926	21.0129	23.7531	12.2203	OG0009294		1
TraesCS6B02G084600	0.238646	0.184371	0.266982	0.470455	0.212356	0.385032	OG0024576	GO:0005488
TraesCS7D02G501200	0	0	0	0	0	0.00726822	OG0049604	GO:0005634
TraesCS7D02G242100	0.0353991	0.048202	0.0673205	0.0784266	0.022168	0.22709	OG0012779	GO:0005634
TraesCS3D02G351200	0.0569362	0.0407716	0.0997333	0.0640803	0.0491906	0.0944342	OG0007928	GO:0003723,GO:0004518,GO:0005739
TraesCS5B02G003300	1.90687	1.9038	1.95815	1.90278	1.4605	1.67044	OG0021076	GO:0000166	17
TraesCS3B02G050000	0.189699	0.342339	0	0.350911	0.30197	0.265132	OG0023706		279
TraesCS1A02G373000	3.06011	3.29242	3.38347	5.13857	2.91389	5.06745	OG0020301		4492
TraesCS4B02G256100	0.0922429	0.0967002	0.0651891	0.119364	0.0914366	0.261801	OG0006846	GO:0000003,GO:0005634,GO:0005777
TraesCS5B02G116100	2.82514	4.1492	2.32219	6.84023	2.25337	6.46456	OG0055536		215
TraesCS3D02G108700	0	0.0129862	0	0.515027	0	0.0354759	OG0011747
TraesCS2A02G456000	0.0822272	0.0771973	0	0.180589	0.0847933	0.322532	OG0018352	GO:0003723,GO:0004518,GO:0005739
TraesCS1A02G089500	12.4492	8.87578	23.3241	51.073	12.2582	167.987	OG0002317	GO:0005618	0
TraesCS7B02G199800	0.0164983	0.00979566	0	0.0368197	0.0108052	0.0693791	OG0019700	GO:0003677,GO:0003700,GO:0005634
TraesCS7D02G048000	0.0500266	0.0608227	0.0277787	0.148976	0	1.23137	OG0010305		20112
TraesCS5B02G066100	0	0	0	0	0	0	OG0015440
TraesCS5D02G470700	0	0	0	0	0	0	OG0028623
TraesCS2D02G519700	5.81305	1.10333	0	3.45933	0	0	OG0014305	GO:0005198,GO:0005618,GO:0005783
TraesCS2A02G511200	1.27207	1.6005	0.602431	0.827185	0.766515	0.604848	OG0028631		1237
TraesCS5D02G003000	0.277581	0.190351	0.413849	0.194934	1.02281	0.0442624	OG0001591	GO:0003677,GO:0003723,GO:0004518,GO:0005634	1838
TraesCS3A02G181700	0	0	0	0	0	0	OG0013442
TraesCS5B02G454900	0	0	0	0	0	0	OG0024444	GO:0005634
TraesCS2B02G333300	2.04247	2.66455	1.62327	4.25136	2.53257	5.25308	OG0006601	GO:0005730	290
TraesCS3A02G076400	1.56023	1.29574	1.51351	1.68548	2.07531	1.76258	OG0010369	GO:0005634	3
TraesCS3B02G327000	0.863201	1.00472	0.940303	1.18766	1.2178	0.862494	OG0015841	GO:0003677,GO:0005634	1098
TraesCS5B02G436600	0.119405	0.0214012	0	0	0	0.20777	OG0001174
TraesCS2D02G189500	0.64204	0.610843	0.535217	0.930036	0.573081	0.934288	OG0015047	GO:0003676,GO:0005634,GO:0005737	8259
TraesCS3D02G337100	0	0	0	0	0	0	OG0015789	GO:0003700,GO:0005730
TraesCS4B02G306500	0.208757	0.296753	0.47161	0.208388	0.487411	0.372019	OG0015284	GO:0005634	169
TraesCS2D02G139900	0	0	0	0	0	0	OG0004806	GO:0003723,GO:0005576,GO:0005634
TraesCS4D02G037900	0	0	0	0.0201327	0	0	OG0025229
TraesCS7D02G117200	0	0	0	0	0	0	OG0048773
TraesCS4A02G327600	0	0	0	0	0	0	OG0023492
TraesCS1D02G205200	0	0	0	0	0	0	OG0000450	GO:0005198
TraesCS4D02G020100	1.76302	1.41493	1.79266	0.775096	2.33506	1.70384	OG0001967		662
TraesCS1A02G142500	2.53548	2.29086	1.7214	2.75154	2.84646	3.45008	OG0012494		4105
TraesCS6B02G116000	0	0.0711439	0	0.0923035	0	0.163782	OG0044481	GO:0003677,GO:0005730
TraesCS7A02G116100	0.930124	0.980213	1.09891	1.47301	1.30323	1.33643	OG0012741	GO:0003676,GO:0005730,GO:0005622	18638
TraesCS4B02G258200	17.3087	20.1123	31.6563	24.0677	16.0632	13.8484	OG0018746	GO:0005488,GO:0005634,GO:0005737	277
TraesCS6A02G022300	1.41433	1.1351	1.60938	2.33379	1.93195	2.84178	OG0006737	GO:0003723,GO:0003824,GO:0005654,GO:0005794	16330
TraesCS6A02G232300	10.8208	10.127	11.5637	9.12241	12.0014	6.60229	OG0002340	GO:0005634	5
TraesCS2D02G079500	0.0515808	0.0671041	0	0.0957578	0	0	OG0018540
TraesCS5A02G179900	0.608238	0.452305	0.462741	0.552081	0.413652	0.617138	OG0001975	GO:0005634,GO:0005783	13862
TraesCS1B02G062200	0	0.0390545	0	0	0	0.330499	OG0000138	GO:0005739
TraesCS5B02G376700	0	0	0	0	0	0	OG0021848
TraesCS3D02G159300	0.59044	0.564226	0.430842	0.842788	0.717578	1.0461	OG0012068	GO:0005634,GO:0005737	10810
TraesCS2D02G381900	0.0807838	0.122508	0.139909	0.245135	0.101309	0.135954	OG0055371
TraesCS7D02G208000	0.0547984	0.0487046	0	0.035296	0.0644903	0.0514868	OG0015504	GO:0003682,GO:0003700,GO:0005634
TraesCS4D02G150600	5.94637	5.20779	5.97694	7.2047	5.45925	6.46247	OG0002540	GO:0000166,GO:0003723,GO:0005634	721
TraesCS6B02G296400	10.8562	14.0124	21.9375	4.48446	35.3904	8.74611	OG0002111		3
TraesCS4D02G321400	0	0	0	0	0	0	OG0027166
TraesCS6D02G122400	0	0	0	0	0	0	OG0008021
TraesCS6A02G374500	4.87846	3.78435	4.13524	4.31238	5.60309	3.49645	OG0012316	GO:0005634	5
TraesCS2D02G451700	0	0	0	0	0	0.0198326	OG0009358	GO:0003677,GO:0005739
TraesCS3B02G106100	0.684965	0.881392	0.705655	2.18528	0.88713	2.94585	OG0003715	GO:0005576,GO:0005739	4
TraesCS7A02G466100	3.06692	2.36237	2.09422	3.87433	2.42782	3.87613	OG0002476		19222
TraesCS2A02G027100	0	0	0	0	0	0	OG0056219	GO:0005739
TraesCS2B02G457000	0.045711	0	0	0	0	0.0857597	OG0009575	GO:0005576
TraesCS7B02G478900	0	0	0	0	0	0	OG0003190
TraesCS5A02G493000	0	0	0	0.00624046	0	0	OG0002726
TraesCS3D02G410800	0	0	0	0	0	0	OG0000235
TraesCS4B02G028500	0.0819009	0.101733	0.0866163	0.331307	0.257683	0.34281	OG0015053	GO:0005634	3465
TraesCS3D02G037300	0.00991835	0.0180456	0.0433811	0.0770047	0.0233451	0.215756	OG0022304
TraesCS2D02G384400	0	0	0	0.0598209	0	0	OG0017626
TraesCS1D02G292500	60.5416	75.8966	55.132	30.9347	92.0614	18.2867	OG0008118	GO:0005488	1
TraesCS5D02G297700	0	0.0286733	0	0	0.0950024	0	OG0025520	GO:0005488
TraesCS2B02G443900	4.08202	3.21107	3.43018	4.64201	3.62383	3.86275	OG0003324	GO:0005488	7765
TraesCS2A02G299700	0.0199482	0	0	0.0131126	0	0.0380973	OG0000529
TraesCS6A02G227900	23.3045	23.3707	13.6424	33.3652	8.83268	34.239	OG0012977	GO:0003677,GO:0003700,GO:0005634	76
TraesCS5A02G153900	0.797151	0.938782	1.362	0.93645	1.27259	11.0634	OG0046430	GO:0005488	2
TraesCS7A02G315600	2.88399	2.89375	3.12516	3.70517	3.77098	4.08005	OG0012532	GO:0005622	18968
TraesCS3A02G498500	0	0	0	0	0	0.0263064	OG0051914
TraesCS3D02G413900	193.591	144.117	241.766	92.4041	261.009	46.2982	OG0011713		3
TraesCS6B02G457800	0	0	0.0062802	0.00464318	0	0	OG0001534
TraesCS5A02G096600	0.606284	0.376513	0.368187	0.54653	0.445403	0.560344	OG0027735		13686
TraesCS3A02G528500	12.6576	11.9132	8.23837	10.6175	7.49674	7.66063	OG0003733	GO:0003677,GO:0003682,GO:0005634,GO:0005737	2092
TraesCS1D02G241400	0	0	0	0	0	0.0467578	OG0001052	GO:0003682
TraesCSU02G164500	0	0	0	0	0	0	OG0023589
TraesCS7A02G157100	0	0	0	0	0	0	OG0045979	GO:0003677,GO:0005634
TraesCS2B02G313900	0.0722499	0.11637	0.0825517	0.147931	0.23262	0.656485	OG0018342		7553
TraesCS2D02G471900	5.05715	3.28345	5.13847	5.20935	4.49294	5.0868	OG0017000		8756
TraesCS5D02G243500	0	0.0298916	0	0.0876786	0.0301578	0.12405	OG0002010	GO:0005634
TraesCS5B02G025900	0	0	0	0	0	0	OG0008749	GO:0005488
TraesCS3D02G107000	0.24071	0.203953	0.140993	0.143161	0.136669	0.0805907	OG0015719
TraesCS6D02G121200	0.0190983	0.0468989	0.108018	0.0587821	0.0267384	0.298303	OG0049403	GO:0005768
TraesCS6D02G354900	0	0	0	0	0	0	OG0004799	GO:0005488
TraesCS3D02G086000	0	0	0	0	0	0	OG0001337	GO:0005515
TraesCS5B02G390100	0	0	0	0	0	0	OG0000605
TraesCS4B02G105600	0	0	0	0.00610189	0	0	OG0049566
TraesCS2D02G360700	0	0	0	0	0	0	OG0028230	GO:0005622
TraesCS7A02G126000	0	0	0	0	0	0	OG0003067
TraesCS3A02G278200	0.174151	0.166014	0.150287	0.131033	0.0985698	0.255253	OG0016293	GO:0005488,GO:0005737
TraesCS1B02G014000	2.72931	3.77812	2.36154	3.2724	3.76935	2.26055	OG0002323	GO:0003824	1
TraesCS2A02G164800	0.598837	0.571467	0.443462	0.712324	0.25438	1.3131	OG0005286	GO:0005622,GO:0005737	6363
TraesCS4B02G355800	1.79049	2.07972	2.18645	2.81645	2.07013	1.85174	OG0020490	GO:0005737	12878
TraesCS1D02G275800	10.38	9.81429	14.9806	11.084	11.4898	18.4866	OG0019467		5854
TraesCS1D02G375300	1.36416	1.38708	1.46759	2.30796	2.36072	3.03998	OG0047081	GO:0005634,GO:0005739	1796
TraesCS3D02G420800	0	0	0	0	0	0	OG0008452	GO:0005634
TraesCS5D02G300800	0	0	0	0	0	0	OG0003437	GO:0005634,GO:0005773
TraesCS4B02G338600	0.127898	0.188377	0.14686	0.193233	0.553378	0.173351	OG0001447		3
TraesCS7D02G263600	1.20598	1.02995	0.761465	2.08767	1.19479	3.18292	OG0012275		0
TraesCS7A02G407900	0	0.0243592	0.0553133	0.0639254	0.146114	0.0283961	OG0015067
TraesCS6D02G268700	22.5885	22.714	22.1087	17.5798	27.7417	11.513	OG0009616		1
TraesCS5A02G433700	0	0	0	0	0	0	OG0002028	GO:0005622
TraesCS5B02G419500	0	0	0	0	0	0	OG0013250
TraesCS2A02G269100	0.622375	0.46764	0.65102	0.859143	0.737488	1.18109	OG0050243		6566
TraesCSU02G127800	0.0622636	0.0347442	0.0564089	0.123337	0.0481069	0.174829	OG0005530	GO:0005622
TraesCS7D02G466000	1.54205	1.30515	1.9391	1.81285	1.76101	1.66097	OG0020644	GO:0000166,GO:0005739	2108
TraesCS6A02G077000	0.0202314	0.0606574	0	0.585424	0.0595778	1.80499	OG0009109	GO:0005576
TraesCS7A02G148400	0	0	0	0	0	0.186199	OG0050217
TraesCS5A02G298800	0.32126	0.336204	0.346537	0.481403	0.629754	0.539416	OG0008840		14038
TraesCS6B02G263000	1.44244	1.62531	2.55474	4.39619	4.08726	7.85407	OG0001153		791
TraesCS2B02G569900	0.147136	0.370126	0.230316	0.388257	0.487044	0.427277	OG0000022	GO:0003677,GO:0003824	7921
TraesCS7A02G138700	0	0	0	0	0	0	OG0018628	GO:0005783
TraesCS4B02G394700	0	0.190419	0.0594971	1.51665	0.185221	0.45914	OG0008437	GO:0005737	522
TraesCS3A02G193700	2.06251	1.9245	2.06684	2.20091	3.06436	2.42707	OG0007491	GO:0005576	1459
TraesCS3A02G442500	0	0	0	0	0	0	OG0017709
TraesCS4D02G102400	0	0	0	0.0399838	0.00710461	0.0263927	OG0050313
TraesCS3A02G298700	0.115064	0.0406681	0.0570329	0.417941	0.0806829	1.8514	OG0019059	GO:0005488,GO:0005730	2
TraesCS6A02G214400	0.300695	0.192676	0.144218	0.0353244	0	0	OG0006678	GO:0005634,GO:0005783
TraesCS2A02G502700	0	0	0	0	0	0	OG0000052	GO:0005488
TraesCS7A02G303200	0	0.00376472	0.00937959	0.0113258	0.00974062	0	OG0052048	GO:0005739
TraesCS6D02G306700	1.78549	1.66164	2.77288	2.75447	2.19424	5.87416	OG0002969	GO:0005488	2
TraesCS3A02G458000	0.11665	0.126222	0.113289	0.219784	0.197	0.200771	OG0058360
TraesCS7B02G348600	3.22479	2.71479	2.17068	2.78191	1.48215	2.15603	OG0000874	GO:0005777	1502
TraesCS4B02G086600	0	0	0	0.120668	0	0.0338294	OG0011095	GO:0003824
TraesCS2A02G245300	0	0	0	0	0	0	OG0017590
TraesCS6B02G338000	1.24814	1.17688	1.26275	1.64806	1.91423	1.61957	OG0047074	GO:0005730	17594
TraesCS3A02G364200	12.3495	13.1313	11.1584	16.7304	9.40851	15.6109	OG0015863	GO:0005488	9517
TraesCS3A02G212000	42.4508	47.5371	32.086	22.6775	33.9178	8.33386	OG0011381		1
TraesCS2D02G236500	12.1155	12.058	10.9319	10.8914	14.8294	8.71875	OG0014898	GO:0005739	91
TraesCS6B02G238800	0.0950463	0.0703022	0.0475488	0.284597	0.0548085	0.205655	OG0001874
TraesCS6A02G002300	0	0	0	0	0	0	OG0000400	GO:0003676
TraesCS1A02G439900	0.038101	0.0684885	0	0.0707331	0.053898	0.203997	OG0000096	GO:0003677,GO:0003700,GO:0005654,GO:0005737
TraesCS7B02G421000	0	0	0	0	0	0	OG0004714	GO:0003677,GO:0003700,GO:0005634
TraesCS6D02G079300	0.187396	0.0897503	0.06287	0.262001	0.110396	0.313971	OG0000459	GO:0005488,GO:0005739	17923
TraesCS4A02G177500	2699.56	3396.07	3763.04	1503.86	4114.27	408.035	OG0004877	GO:0005618,GO:0005634	5
TraesCS1D02G403600	0.0167635	0.0387918	0.012329	0.0367816	0.0341356	0.0690479	OG0021198	GO:0003723,GO:0004518,GO:0005739
TraesCS2D02G369900	0	0.015238	0.0342038	0.194783	0	0.258843	OG0014135	GO:0003677,GO:0003700,GO:0005634
TraesCS1B02G044600	0	0	0	0	0	0	OG0021927
TraesCS2B02G064800	0	0	0	0	0	0	OG0002638	GO:0005488
TraesCS5B02G460100	0.18893	0.0496429	0.0598022	0.135359	0.0258682	0.218547	OG0000827
TraesCS6D02G244700	0	0	0	0	0	0	OG0016855
TraesCS6A02G053800	0	0	0	0	0	0	OG0001941	GO:0003677,GO:0003700,GO:0005634
TraesCS4B02G089200	0.107964	0.196685	0	0	0.0615743	0.20555	OG0013565	GO:0005794
TraesCS1A02G172100	0.521258	0.677808	0.39775	0.777886	0.549093	1.35172	OG0054679	GO:0003677,GO:0005654,GO:0005730,GO:0005739,GO:0005794	698
TraesCS3D02G448700	0	0	0	0.0781036	0	0.227853	OG0000302	GO:0005634
TraesCS1A02G067900	0.756177	0.820835	1.21087	1.06799	1.98875	0.947329	OG0011658		3988
TraesCS7A02G185100	0.0624984	0.0734458	0.031266	0.066335	0	0.0896478	OG0007389	GO:0003723,GO:0004518,GO:0005739
TraesCS7B02G301700	0	0	0	0	0	0	OG0028910	GO:0003677,GO:0005737
TraesCS2D02G058900	0.432693	0.366245	0.0873453	0.447372	0.418615	0.463553	OG0008987	GO:0005783	8065
TraesCS2D02G210000	39.4416	34.5763	29.6382	28.9729	25.5204	20.9561	OG0009997		943
TraesCS2A02G308300	3.01379	2.64625	2.62765	2.51187	3.94182	2.82872	OG0002868		25
TraesCS2A02G217200	0.0325188	0.132957	0.0184259	0.3738	0.0350758	1.84323	OG0005201		2
TraesCS3D02G517600	0	0.0698169	0.0915863	2.19754	0	5.51445	OG0049372
TraesCS7D02G396400	0	0	0	0	0	0	OG0003293	GO:0005622,GO:0005634
TraesCS1A02G430100	0	0.0484839	0.0254702	0.0369701	0	0.14606	OG0044327	GO:0005739,GO:0005783
TraesCS7B02G211400	0	0	0	0	0	0	OG0001791
TraesCS7B02G074200	0	0	0	0	0	0	OG0003092	GO:0005576
TraesCS3D02G183800	3.07788	2.82366	3.48791	3.64018	4.09287	4.3081	OG0002264		888
TraesCS1B02G129100	0	0	0	0	0	0	OG0001532	GO:0005488
TraesCS2D02G045100	0	0	0	0.088216	0	0	OG0021000	GO:0005737
TraesCS3D02G465800	0	0	0	0	0	0	OG0023640	GO:0003676
TraesCS3D02G545400	0	0	0	0	0	0	OG0016040	GO:0000166,GO:0003676,GO:0005634
TraesCS5B02G210500	0.0100971	0.00918542	0	0	0	0	OG0018057	GO:0000166
TraesCS5A02G539300	0	0	0	0	0	0	OG0000313
TraesCS1A02G048800	0	0	0	0	0	0	OG0021026
TraesCS5B02G343000	0	0	0	0.141169	0	0	OG0000079	GO:0005515,GO:0005739
TraesCS5B02G461000	0.538351	0.653445	0.780738	0.776682	1.14765	0.899953	OG0022999	GO:0003723,GO:0004518	868
TraesCS6A02G357700	0	0	0	0	0	0	OG0023641
TraesCS1B02G346100	0.743341	0.408891	0.618308	0.761501	0.545773	1.01861	OG0015946		5176
TraesCS4A02G434300	0	0	0	0	0	0	OG0002203
TraesCS7B02G409600	0.0162132	0.0152995	0	0.013051	0.0366634	0	OG0012682	GO:0005634,GO:0005777
TraesCS4A02G188900	1.162	0.976217	1.25411	1.7882	0.91651	2.31788	OG0013567	GO:0005737	2188
TraesCS7A02G237700	0	0	0	0	0	0	OG0055476	GO:0005488,GO:0005739
TraesCS5A02G018100	0	0.067078	0	0.0572197	0	0.271514	OG0027584	GO:0005576,GO:0005773
TraesCS4A02G443000	0	0	0	0	0	0	OG0011817	GO:0005576
TraesCS2A02G292400	0	0	0	0	0	0	OG0004135
TraesCS2A02G091600	0	0	0.0106896	0.0158064	0	0.0088627	OG0002158
TraesCS2B02G426200	0.638968	0.544549	0.44522	0.708686	0.44562	0.845077	OG0014161		7744
TraesCS3D02G462900	1.76812	1.825	1.72202	2.28919	2.70061	2.88862	OG0004626	GO:0005515	137
TraesCS6D02G021300	0	0	0	0.0742441	0.106387	0.101956	OG0020958	GO:0003677
TraesCS5D02G529800	0	0	0	0	0	0	OG0021057
TraesCS5D02G370300	0	0	0	0	0	0	OG0004990	GO:0005622,GO:0005737
TraesCS3A02G026000	0.66849	0.767037	0.671544	1.71886	1.0347	1.79854	OG0004500		130
TraesCS1D02G262600	3.08059	2.62811	2.61011	3.2901	2.94338	3.32899	OG0003686	GO:0003723,GO:0005634	2661
TraesCS1A02G262200	1.15327	1.23245	1.38632	1.41464	1.66393	1.66207	OG0046893	GO:0005634	4344
TraesCS7D02G343700	0.134854	0.263409	0.108363	0.109554	0.124751	0.269615	OG0001402
TraesCS6D02G352500	0.508757	0.541895	0.591928	0.84838	0.717578	1.22323	OG0012879	GO:0005634	355
TraesCS3B02G529300	0	0	0	0.806578	0	3.4679	OG0017674	GO:0005576,GO:0005618,GO:0005773
TraesCS5A02G056600	0.520426	0.440654	0.251054	0.562265	0.35925	0.226512	OG0023061		320
TraesCS3B02G445200	0	0	0	0	0	0	OG0004536	GO:0005488,GO:0005768,GO:0005783,GO:0005794
TraesCS3B02G313700	0.0775465	0.187472	0.106599	0.755943	0.0608955	2.43938	OG0005694		2
TraesCS3B02G029500	0.0145746	0.0176973	0.0110282	0.0384503	0.0185466	0.0641954	OG0015568	GO:0005198,GO:0005488
TraesCS7A02G292300	2.89777	1.38906	2.73253	1.97716	2.90764	2.17931	OG0023505		18908
TraesCS7D02G250600	0.0326767	0	0	0.305956	0	1.19498	OG0045387	GO:0005739
TraesCS2A02G533800	1.49437	2.70804	1.55169	4.65689	0.163606	3.71841	OG0022295		7005
TraesCS5A02G137600	1.06653	1.036	1.22792	1.47656	1.51885	2.25375	OG0055027	GO:0005622,GO:0005634,GO:0005737,GO:0005768,GO:0005783	101
TraesCS7D02G397600	0.0414286	0.232785	0.402902	0.25512	2.0113	0.354451	OG0002737	GO:0005773	71
TraesCS6B02G054600	0	0	0	0	0	0	OG0008516
TraesCS5B02G565000	0.371555	0.531732	0.628051	0.575788	0.845536	0.543852	OG0000164	GO:0005730,GO:0005737	345
TraesCS7D02G100100	0	0.000770553	0	0	0	0	OG0055585	GO:0005618,GO:0005622,GO:0005730,GO:0005773
TraesCS1B02G297200	0	0	0	0	0	0	OG0051740	GO:0003677,GO:0003824,GO:0005654,GO:0005730,GO:0005773
TraesCS4B02G307600	0.133574	0.0826455	0.144407	0.0368037	0.0947607	0	OG0046591	GO:0005634,GO:0005773
TraesCS1D02G175100	0.324498	0.358928	0.124021	0.442474	0.102949	0.379705	OG0016998		5666
TraesCS1B02G179500	6.30492	7.90342	12.2761	3.06316	23.7592	3.26303	OG0049786	GO:0003774	3
TraesCS1D02G056000	0	0	0	0	0	0	OG0010270
TraesCS7D02G090400	0	0	0	0	0	0	OG0001549
TraesCS7D02G147600	0.0637971	0.102005	0.0434237	0.0564942	0.0416976	0.0445847	OG0015123	GO:0005737
TraesCS5A02G101300	1.27865	1.47855	1.36871	1.83141	1.61279	1.73691	OG0013881		13693
TraesCS6B02G357800	1.60643	2.05971	1.51456	3.92237	3.42707	5.89673	OG0014693		128
TraesCS3A02G493700	0.621774	0.213351	0.164262	0.331713	0.447178	0.0890122	OG0028923		9706
TraesCS3B02G454800	0.287951	0.161412	0.177313	0.322038	0	0.110334	OG0019364	GO:0000166,GO:0003677,GO:0003723,GO:0003824,GO:0005634
TraesCS1D02G317800	0	0	0	0	0	0	OG0044441	GO:0005576
TraesCS3A02G025600	0	0	0	0.0857706	0	0	OG0011507	GO:0005634,GO:0005783,GO:0005794
TraesCS5D02G447300	0.505741	0.356805	0.544149	0.987285	0	0.401492	OG0002745		3392
TraesCS5A02G451800	0.221005	0.218669	0.32114	0.285222	0.286674	0.621057	OG0028075	GO:0005576	1688
TraesCS2A02G543600	0	0	0	0	0	0	OG0002998	GO:0005634
TraesCS7A02G431200	0.271052	0.160057	0.19104	0.27543	0.116771	0.280542	OG0000529		19161
TraesCS6D02G015000	3.27494	4.34832	0.98075	3.91197	2.48303	3.14468	OG0044493	GO:0005783	96
TraesCS1D02G277400	6.66267	7.72998	8.64351	12.0015	6.29608	11.5631	OG0047413		5860
TraesCS7A02G237000	7.10998	8.06346	6.18825	4.80197	6.96109	3.03768	OG0055163	GO:0003723,GO:0005739	1
TraesCS3D02G095500	1.50415	1.5702	2.06538	2.91221	1.90471	3.29566	OG0007678	GO:0005634	10706
TraesCS5B02G367300	9.9773	10.2937	13.0638	12.0692	10.1246	5.90605	OG0023524		2283
TraesCS7D02G342000	1.7558	2.23253	1.92852	1.29889	2.51457	0.912979	OG0022589		1
TraesCSU02G071200	0	0	0	0	0	0	OG0020957
TraesCS5B02G286500	6.02764	6.74467	6.71552	9.63526	4.43153	9.64127	OG0018143	GO:0005739	14911
TraesCS7A02G239700	2.17065	2.32932	2.02758	2.5671	1.77555	2.14533	OG0012290	GO:0000166	16
TraesCS7D02G273600	0.0461447	0.0642065	0.0403819	0.151823	0.0917157	0.309056	OG0002444	GO:0003723,GO:0005622	20466
TraesCS6A02G390600	2.77218	2.80759	2.85294	7.39886	4.01173	14.1294	OG0053122	GO:0005654	0
TraesCS2D02G361900	1.86834	1.66529	1.46482	2.66806	1.25498	4.56152	OG0059000	GO:0005622,GO:0005634	14
TraesCS3D02G441200	3.68943	3.20437	4.1151	6.8524	6.62418	8.99669	OG0052404		2174
TraesCS6B02G058900	0.0334397	0.0967931	0.0480245	0.156934	0.113661	0.156267	OG0021024
TraesCS5D02G048100	0.0068058	0.0112742	0.0143011	0.0152886	0.0140348	0.0427138	OG0000603	GO:0005737
TraesCS4B02G277200	0.40354	0.900069	0.382605	1.02889	1.1152	2.98738	OG0012930		2223
TraesCS3D02G407900	0	0	0	0	0	0	OG0007909	GO:0000166,GO:0003676
TraesCS3A02G127700	0.0204922	0.0679207	0.0605167	0.0296531	0.0483315	0.0309694	OG0015972	GO:0005783
TraesCS7B02G075800	0	0	0	0	0	0	OG0006880
TraesCS3A02G523700	8.09461	10.2277	7.98918	5.4221	9.39197	3.56961	OG0012846	GO:0003723,GO:0004518,GO:0005739	1
TraesCS7B02G174800	1.78439	1.30934	2.12873	2.36954	1.50475	2.28592	OG0012696	GO:0005777	1084
TraesCS7D02G300200	1.82389	1.59207	1.71496	2.46458	2.14946	3.06013	OG0045417	GO:0005737	20527
TraesCS4D02G147200	0.0236426	0.0382547	0.0263557	0.0946769	0.040015	0.102279	OG0002509	GO:0005634
TraesCSU02G164900	0	0	0	0	0	0	OG0013240
TraesCS6B02G435500	0	0	0	0	0	0	OG0027671	GO:0005488,GO:0005618
TraesCS2D02G058400	0.226965	0.400219	0.172727	0.468371	0.171668	0.937814	OG0002067	GO:0005739	8064
TraesCS4B02G087400	8.84333	11.7343	6.49117	14.9144	7.89532	10.5509	OG0006290	GO:0005634	32
TraesCS3B02G411900	1.89929	1.70263	1.34583	3.5509	2.13845	5.63576	OG0002913	GO:0005783	792
TraesCS3A02G417600	2.93832	2.61895	3.27258	3.68938	3.13626	4.0891	OG0011811	GO:0005634,GO:0005794	9623
TraesCS6A02G416200	0	0	0	0	0	0	OG0020618
TraesCS2D02G312300	0	0	0	0	0	0	OG0024287
TraesCS6A02G144900	1.63642	1.33984	1.51242	2.36337	1.857	3.48514	OG0055785	GO:0005488,GO:0005768	0
TraesCS4B02G326200	0	0	0	0	0	0	OG0003514
TraesCS6A02G320600	0	0	0	0	0	0	OG0055174
TraesCS2B02G204000	0	0.0202162	0.0515528	0.155624	0.0891991	0.128227	OG0006059
TraesCS1D02G269400	0.0311967	0.057555	0.0465498	0.124751	0.0476543	0.301751	OG0001818	GO:0005618
TraesCS4B02G076400	0.0569119	0.215348	0.456157	1.64384	0.0273396	2.3659	OG0008618		1966
TraesCS5D02G388800	0	0	0	0	0	0	OG0053670
TraesCS5A02G254300	0.451842	0.362702	0.22144	0.145782	0.278423	0.485356	OG0000120	GO:0005488,GO:0005737	46
TraesCS3A02G163000	1.95108	3.13187	2.28335	4.59707	2.22671	3.25491	OG0015867	GO:0003676	9153
TraesCS1D02G113600	1.39741	1.4279	1.22236	2.44642	1.15775	2.53466	OG0012064		1257
TraesCS6D02G379900	0.0629352	0.0523024	0.0461363	0.397888	0.0443719	0.418392	OG0000791		53
TraesCS3B02G033800	0	0	0	0	0	0	OG0017320	GO:0005634
TraesCS4A02G467300	0	0	0	0	0	0	OG0006111
TraesCS5D02G057900	0.076191	0.0347235	0.0131247	0.125436	0.0113545	0.0940087	OG0024119	GO:0005634
TraesCS1A02G305300	5.4195	7.08763	7.80908	9.00025	8.57747	6.71496	OG0015986		2407
TraesCS5A02G429900	0	0	0	0	0	0	OG0005869	GO:0005198,GO:0005576,GO:0005618
TraesCS3B02G609800	0.399272	0.223624	0.169462	0.337645	0.347195	0.707957	OG0004488		2
TraesCS1D02G446700	0	0	0	0	0	0	OG0029042	GO:0003824
TraesCS5A02G405400	0	0	0	0	0	0	OG0014768	GO:0003677,GO:0003700,GO:0005634
TraesCS1A02G201000	0.554206	0.35741	0.541557	0.74585	0.649192	0.890555	OG0020623		4239
TraesCS2A02G188100	0.624294	0.887185	0.534371	2.17265	0.936025	1.94458	OG0057684	GO:0005654,GO:0005730	133
TraesCS2D02G118000	3.31714	4.06392	3.10738	5.13319	2.78544	4.28438	OG0010057	GO:0005739	8145
TraesCS5D02G326200	32.3187	19.3217	52.8207	24.9682	24.0904	19.9183	OG0004056	GO:0005634,GO:0005737	256
TraesCS3A02G218200	0.921287	0.697429	0.736837	1.15801	0.907195	1.92638	OG0016171		2375
TraesCS2B02G464700	0	0	0	0.0350889	0	0.490115	OG0000589	GO:0005773,GO:0005794
TraesCS5A02G197700	0.197884	0.217383	0.140652	0.257698	0.137656	0.654578	OG0009001	GO:0005654	485
TraesCS2B02G343100	0.0286412	0.0500345	0.0334487	0.0672772	0	0.130655	OG0046333	GO:0000003,GO:0005783
TraesCS6A02G136600	12.2907	11.2906	13.6154	16.0542	17.2577	25.8961	OG0050646	GO:0005215,GO:0005488	2
TraesCS5D02G534800	0	0	0	0.0274491	0	0	OG0003709
TraesCS7B02G085800	0	0	0	0	0	0	OG0015188	GO:0005634
TraesCS5B02G049600	1.00864	0.863876	0.922482	1.22224	1.49658	1.92318	OG0006271	GO:0003677,GO:0005739,GO:0005794	2662
TraesCS2B02G465200	0.026247	0.0363516	0.0495217	0.106383	0.0457488	0.0991833	OG0003239
TraesCS1A02G272700	0.125644	0.130023	0.127881	0.170228	0.0761658	0.385777	OG0023282		2397
TraesCS2D02G097200	2.92205	3.55133	2.66789	5.63029	3.393	6.78411	OG0006745	GO:0005730	77
TraesCS6B02G028900	1.63658	2.14547	1.50179	2.42063	2.05302	2.23346	OG0008666		17028
TraesCS2A02G200400	0	0	0	0	0.0162116	0	OG0002402
TraesCS2D02G053100	1.15158	1.24423	0.649171	0.700766	1.09103	0.377417	OG0005108		1
TraesCS4A02G313600	8.624	7.29965	11.0444	9.59204	11.9358	9.71992	OG0047749		435
TraesCS3D02G354400	0.120199	0.246472	0	0.109729	0	0.108306	OG0000187
TraesCS2B02G547400	0	0	0	0	0	0	OG0014378	GO:0003723,GO:0005737
TraesCS2A02G297200	0	0	0	0	0	0	OG0056992
TraesCS7A02G433800	0	0	0	0	0	0	OG0002414
TraesCS5A02G294400	0	0	0	0.256305	0	0.965931	OG0008603	GO:0000166
TraesCS5A02G152300	1.39801	0.922349	1.92748	1.40831	0.909094	1.60685	OG0008968	GO:0005488,GO:0005739	220
TraesCS5D02G150000	62.6711	58.792	65.4476	61.8873	64.0284	58.6131	OG0055186	GO:0005773
TraesCS5B02G362800	0.122355	0.23557	0.199237	0.618371	0.104034	0.0652588	OG0008926	GO:0000166,GO:0003824,GO:0005634	902
TraesCS7A02G554800	0	0	0	0	0	0	OG0003404	GO:0005634,GO:0005783
TraesCS3A02G319300	0	0	0	0	0	0	OG0005065	GO:0005576,GO:0005764
TraesCS3B02G397300	0.0647095	0.0921828	0.0465137	0.241271	0.0931584	1.18815	OG0047346		2
TraesCS7D02G113900	0	0	0	0	0	0	OG0000124	GO:0000003,GO:0005576,GO:0005618
TraesCS6B02G403100	0	0	0	0	0	0	OG0001789	GO:0003676,GO:0005634
TraesCS6B02G266100	0.563063	0.557929	0.690059	1.58442	1.25262	2.10445	OG0016879	GO:0005198,GO:0005634,GO:0005773	8
TraesCS4A02G366600	0.0913173	0.074116	0.10599	0.164348	0.121266	0.236993	OG0000356
TraesCS4B02G008100	0	0	0	0	0	0	OG0024200
TraesCS7D02G359300	0	0.061534	0	0.0525116	0.179912	0.0810309	OG0010949	GO:0005618
TraesCS7A02G546100	0	0.0101172	0	0	0.0225784	0.0201114	OG0023715	GO:0005488,GO:0005773
TraesCS7A02G066600	0.198291	0.214812	0.354436	0.0269301	0.362843	0.384605	OG0004801	GO:0003723,GO:0005634	493
TraesCS7B02G126900	1.3343	1.31583	1.40506	1.92834	1.40953	1.90387	OG0011107		19486
TraesCS1B02G028800	0.139129	0.101536	0.185852	0.336112	0.0992593	0.212444	OG0007747	GO:0003723,GO:0004518,GO:0005739	4632
TraesCS3D02G453200	0.0511419	0	0	0.0350443	0	0	OG0024138
TraesCS4A02G077900	0	0	0	0.00857976	0	0	OG0054722
TraesCS5A02G402000	2.54602	2.10853	2.35928	3.33005	2.53192	4.47115	OG0009998	GO:0005783	513
TraesCS5A02G306800	2.36026	1.1212	1.70238	2.47058	1.82493	3.52532	OG0009193		14049
TraesCS4B02G192500	0.782101	0.618152	0.687125	1.30795	0.537675	1.12765	OG0053897	GO:0005576	12592
TraesCS3A02G304400	0	0	0	0.0418869	0	0.0753562	OG0005646
TraesCS7B02G422400	0	0	0	0	0	0	OG0001298	GO:0005634
TraesCS5B02G018200	0	0	0	0	0	0	OG0017266
TraesCS2A02G294500	0.242607	0.366748	0.117983	0.320531	0.229722	0.336649	OG0056427		137
TraesCS6D02G398100	0	0	0	0.251907	0	1.9151	OG0004620	GO:0003677,GO:0005634
TraesCS6B02G050500	0	0	0	0	0	0	OG0000000
TraesCS4B02G085000	0	0	0	0	0	0.849048	OG0023269
TraesCS2A02G477000	0.289172	0.527835	0	1.18842	0	0.535935	OG0056074	GO:0005730,GO:0005737
TraesCS7D02G398300	3.15659	2.59107	2.33354	1.54932	4.87972	0.57157	OG0001424	GO:0005488,GO:0005634	5
TraesCS2D02G556000	0	0.0233502	0	0	0	0	OG0055451	GO:0005777
TraesCS6B02G223800	1.51697	2.07185	1.47685	2.70159	1.53699	1.9309	OG0044398	GO:0003677	17368
TraesCS2B02G337400	0.756081	0.53759	0.563273	0.801985	0.599735	0.935553	OG0014244	GO:0000166,GO:0003676	7586
TraesCS4A02G457100	5.77704	4.79143	5.6062	6.88183	5.93315	10.4496	OG0053366	GO:0005634	12185
TraesCS4D02G165800	0.66117	0.582886	0.553192	0.639841	0.640784	0.514481	OG0000848	GO:0005654	956
TraesCS3B02G290300	0.0485092	0.0551853	0.077291	0.515217	0.0555871	4.62892	OG0000066		2
TraesCS3B02G366600	0.0082173	0.00433337	0	0.00529281	0	0.0263107	OG0000798
TraesCS2D02G172300	0	0	0	0	0	0	OG0054809	GO:0005576,GO:0005618,GO:0005773
TraesCS4A02G451500	0	0	0	0	0	0	OG0001407	GO:0005488
TraesCS3D02G353700	0.175519	0.0914004	0	0.137484	0	0.269036	OG0001479	GO:0003824,GO:0005737
TraesCS6A02G342600	0	0	0	0	0	0	OG0026969
TraesCS5B02G427000	4.25337	5.24364	3.68091	3.1649	4.37487	1.26718	OG0015038	GO:0003676,GO:0005622	1
TraesCS3B02G168900	0.453051	0.497149	0.0611158	0.224114	0.0308445	0.483226	OG0001970	GO:0005773	383
TraesCS1D02G215200	0	0	0	0	0	0	OG0000499	GO:0005576
TraesCS6A02G122000	0.0100297	0.00701682	0.0126627	0.0315916	0.00773999	0.0897897	OG0051235
TraesCS7D02G058700	0	0	0	0	0	0	OG0056479
TraesCS4D02G231500	1.81243	1.67224	3.30696	1.79529	3.67949	1.98361	OG0010416	GO:0004518,GO:0005634	867
TraesCS1B02G390200	0	0	0	0	0	0	OG0017610
TraesCS1D02G056800	0	0.0333002	0	0.0166967	0	0.0458576	OG0002964	GO:0003677,GO:0005737
TraesCS5D02G420700	0.77014	0.853449	0.682517	0.99714	0.893537	4.04865	OG0018509		2
TraesCS7A02G131300	1.78705	1.50569	1.62839	2.24278	2.17576	2.99442	OG0045797		18648
TraesCS3D02G164400	0.941797	0.822285	0.71517	1.67164	0.944652	2.75814	OG0050359	GO:0005488,GO:0005618,GO:0005794	4
TraesCS5D02G322200	0.054711	0.0513576	0.0446871	0	0.0322228	0	OG0028200	GO:0005773
TraesCS6B02G394100	0	0	0	0	0	0	OG0013364	GO:0005488
TraesCS6D02G087000	0	0	0	0	0	0	OG0029019
TraesCS5D02G304500	0.0166691	0.0175808	0.03887	0.0657563	0.0784691	0.0717966	OG0003019	GO:0005739,GO:0005794
TraesCS7A02G569300	0	0	0	0	0	0	OG0044789	GO:0003677,GO:0005634,GO:0005737
TraesCS6D02G158220	0.00970964	0.035528	0.0429235	0.0229137	0.0352428	0.101334	OG0054024	GO:0003723,GO:0004518,GO:0005739
TraesCS3A02G180800	0.0991941	0.0536721	0.0647907	0.112004	0.073906	0.107649	OG0023539	GO:0005622
TraesCS6A02G395100	3.00379	2.32734	2.53132	3.34703	2.49374	2.85537	OG0012955	GO:0005739	16944
TraesCS1A02G387600	0	0	0	0	0	0	OG0016019	GO:0005215
TraesCS3D02G514600	0	0	0	0	0	0	OG0017653
TraesCS3A02G011400	0	0	0	0.0388094	0	0.191021	OG0020898
TraesCS4D02G041100	5.57845	5.3464	7.44152	5.81207	11.8392	7.91847	OG0006764	GO:0005773,GO:0005783,GO:0005794	3
TraesCS2D02G386400	0	0	0	0	0	0	OG0009714
TraesCS3B02G452400	0	0	0	0	0	0	OG0001852	GO:0005634
TraesCS7D02G005200	0.0546868	0.104807	0	0.0749851	0	0.347217	OG0023292
TraesCS3B02G416800	0	0	0.0319774	0	0	0	OG0000642	GO:0005634
TraesCS2A02G453800	10.4209	11.2004	11.6244	30.5842	7.95474	20.409	OG0000102	GO:0000166	724
TraesCS2B02G148900	42.8949	41.8455	73.0072	67.5632	40.0415	62.7879	OG0003498	GO:0005488,GO:0005737	7247
TraesCS3B02G394200	6.29349	6.26919	4.33374	6.60833	1.0932	4.27005	OG0016201	GO:0003677,GO:0003682,GO:0005634	100
TraesCS1D02G147800	0.0144999	0	0.00741338	0.0517367	0.0106912	0.127466	OG0001873
TraesCS1B02G251700	0.020691	0.0832868	0.0426374	0.522714	0.02633	1.70718	OG0023343	GO:0005634,GO:0005773	2
TraesCS1B02G033300	0	0	0	0.0211613	0	0	OG0000412	GO:0003676
TraesCS4B02G364700	0	0	0	0	0	0	OG0013229	GO:0005634
TraesCS6A02G044500	0	0	0	0	0	0	OG0013315
TraesCS3B02G180500	3.45977	3.86744	3.16766	5.1392	4.16094	6.91583	OG0007829		2103
TraesCS7D02G043200	0	0	0	0	0	0	OG0002203	GO:0003676
TraesCS6A02G146900	0.273877	0.648745	0.78631	3.32105	0.885599	8.78805	OG0000454	GO:0003700,GO:0005634	0
TraesCS3B02G525900	0	0	0	0	0	0	OG0056776	GO:0005739
TraesCS7D02G361300	0.0906826	0.210469	0.02602	1.86493	0.0587444	15.7405	OG0005208	GO:0005737	0
TraesCS7A02G021400	0.0854973	0.159827	0.077024	0.225944	0.0857605	0.0564437	OG0000514	GO:0005622	78
TraesCS7B02G417900	0	0.00374103	0.0153981	0.0102524	0.00695499	0.55336	OG0000165
TraesCS6B02G101300	0.120749	0.189201	0.108456	0.218766	0.0971281	0.261663	OG0003073	GO:0003676
TraesCS3A02G165800	1.46233	1.72923	1.68521	2.70532	1.73872	1.97411	OG0029079		9160
TraesCS2A02G476200	0.351197	0.159875	0.0883679	0.262944	0.315912	0.414382	OG0009465	GO:0003723,GO:0004518,GO:0005739	6921
TraesCS7B02G326500	0.361439	0.397859	0.407029	0.750941	0.430803	0.532179	OG0021112		19864
TraesCS5A02G058100	3.04814	2.7155	2.69968	3.78943	2.87391	4.38564	OG0013597	GO:0005634	152
TraesCS7B02G195600	0	0	0	0.00695437	0	0	OG0017457
TraesCS6D02G044200	0	0	0	0	0	0	OG0013314	GO:0005488
TraesCS2B02G500200	0	0.0544058	0	0.721556	0	0.280454	OG0053731	GO:0005730,GO:0005737
TraesCS2D02G209000	1.42322	1.3052	1.32829	2.1284	1.49901	2.45902	OG0014999	GO:0000003,GO:0003677,GO:0005634	8300
TraesCS3A02G361800	2.66814	3.21215	2.3117	2.79322	0.78927	1.01127	OG0016201	GO:0003677,GO:0003682,GO:0005634	226
TraesCS3B02G074300	0	0	0	0	0	0	OG0020787
TraesCS7D02G333100	0.921052	1.16647	1.15403	2.94577	1.98737	2.28788	OG0022163		20587
TraesCS2B02G221100	0	0	0	0	0	0.0326921	OG0009957	GO:0005739
TraesCS6B02G112600	0.500732	0.254419	0.414518	0.808244	0.724137	0.392856	OG0023939	GO:0003676	2030
TraesCS4B02G391500	0	0	0	0	0	0	OG0001721	GO:0005634
TraesCS4A02G111500	0.171069	0.206321	0.171972	0.23759	0.163775	0.276647	OG0007340
TraesCS5D02G568700	0.87436	0.683794	1.10162	1.31505	2.03673	2.46604	OG0000067	GO:0005618	16304
TraesCS6D02G012100	0.0350328	0.0719604	0	0.203547	0.16487	0.28884	OG0000582
TraesCS7D02G391700	0.055842	0.018037	0	0.192709	0	0.703351	OG0001413	GO:0005634
TraesCS3A02G332300	1.37134	3.39246	1.39987	1.28158	1.08418	0.483121	OG0007846	GO:0005198,GO:0005488	1
TraesCS5D02G309000	5.24872	6.01516	4.054	14.7759	5.2524	54.0831	OG0045651	GO:0005794	0
TraesCS7B02G372700	1.92486	1.78585	2.02604	3.11445	2.27411	3.4404	OG0048080		19923
TraesCS3A02G191500	0.0343425	0.0565341	0	0.033865	0.0527988	0.0158105	OG0015757	GO:0000003,GO:0005618,GO:0005634,GO:0005737
TraesCS5B02G069900	0.0896647	0.131148	0.168098	0.397848	0.0587853	0.527176	OG0009203		0
TraesCS3B02G195600	4.52104	4.41327	5.38208	4.40396	7.57402	5.64416	OG0028644	GO:0005576	22
TraesCS6B02G086300	0	0	0	0	0	0	OG0000008	GO:0003676,GO:0003824,GO:0005634
TraesCS2D02G289400	0	0	0	0	0.0485407	0.112009	OG0005146	GO:0005634
TraesCS7A02G242300	0.627697	0.454834	0.444404	1.16094	0.485996	1.31825	OG0001105		18805
TraesCSU02G165800	0	0	0	0	0	0	OG0000048	GO:0003677
TraesCS6B02G061800	0.315989	0.284589	0.161556	0.240842	0.186223	0	OG0000943
TraesCS3B02G234800	0	0	0	0	0	0	OG0000778	GO:0005576,GO:0005622
TraesCS5D02G359000	0	0	0	0.00860062	0	0.0152608	OG0000106	GO:0005515
TraesCS3D02G400200	2.46301	2.52187	2.35525	3.71541	2.12336	4.0088	OG0016188		11246
TraesCS2A02G506100	0	0	0	0	0	0.0645279	OG0009409	GO:0003700,GO:0005488,GO:0005634
TraesCS7B02G149200	8.23057	6.65636	8.55302	27.6619	15.8067	52.5268	OG0055902	GO:0005618,GO:0005730,GO:0005739,GO:0005773,GO:0005794	0
TraesCS5A02G354400	3.67549	2.87829	2.21855	1.46818	1.69747	1.12701	OG0005977		1219
[truncated: 105,893 more rows]

## Sheet: Bd21-3
Table S6. Average gene expression (FPKM), orthogroup, GO terms, and coexpression cluster numbers associated with all genes in Bd21-3.
GeneID	FPKM2dpi_mock	FPKM2dpi_inoc	FPKM4dpi_mock	FPKM4dpi_inoc	FPKM6dpi_mock	FPKM6dpi_inoc	Orthogroup	Goterms	Cluster
BdiBd21-3.4G0090300	1.70244	2.66293	1.24798	3.57668	1.99352	2.69889	OG0008624		5
BdiBd21-3.1G0113500	4.20878	5.63927	6.69676	5.9	7.0313	6.72229	OG0010708		145
BdiBd21-3.4G0419400	21.3382	17.7592	28.8619	16.9783	35.672	17.632	OG0009170		1
BdiBd21-3.4G0493100	11.4181	9.276	11.5064	10.8175	10.207	6.6796	OG0014042		100
BdiBd21-3.2G0484300	12.4448	11.1834	12.3391	12.1612	12.1957	11.5726	OG0019323		143
BdiBd21-3.4G0262200	0.920692	1.24026	0.572844	1.13732	0.824815	1.12253	OG0030385		7252
BdiBd21-3.2G0534600	0	0	0	0	0	0	OG0000033
BdiBd21-3.5G0204300	12.1621	7.59845	14.8045	7.42798	30.207	5.98159	OG0001156	GO:0003824	18
BdiBd21-3.3G0205500	0.212553	0.206273	0.161033	0.180386	0.0632352	0.150854
BdiBd21-3.2G0326400	0.0519841	0	0	0	0	0	OG0000413	GO:0005576
BdiBd21-3.1G0716000	0	0	0	0	0	0	OG0000135	GO:0005515
BdiBd21-3.1G1004900	0	0	0	0	0	0	OG0002154
BdiBd21-3.2G0056000	0	0	0	0	0	0	OG0034868
BdiBd21-3.4G0054900	0	0	0	0	0	0	OG0017933
BdiBd21-3.2G0357300	3.0019	3.33965	3.07083	3.58647	3.45122	4.64222	OG0002292		4830
BdiBd21-3.4G0626100	13.7911	7.48796	15.2071	7.38152	9.4099	7.20589	OG0008835		11
BdiBd21-3.1G0580500	13.7867	21.2867	14.2071	16.5531	14.0166	17.3017	OG0005271		365
BdiBd21-3.2G0264000	0.415646	0.591991	0.377687	0.673054	0.521693	0.580324	OG0003593		4663
BdiBd21-3.3G0024100	0	0	0	0	0	0	OG0000489	GO:0005515
BdiBd21-3.3G0776200	0.0215449	0.043538	0	0	0	0	OG0001951
BdiBd21-3.2G0182050	25.0621	19.4115	22.13	23.8152	27.0112	29.4646	OG0035265		4542
BdiBd21-3.1G0692400	0.158809	0.182259	0.0543722	0.214468	0.0403859	0.244854	OG0011095
BdiBd21-3.2G0737100	24.0189	32.653	23.8615	25.9133	37.2584	22.2912	OG0007529	GO:0003723	5414
BdiBd21-3.1G0703150	0.385768	0	0	0	0	0.308902	OG0033276
BdiBd21-3.3G0299800	0	0	0	0	0	0	OG0000031
BdiBd21-3.1G1009900	0.257014	0.183049	0.502726	0.257235	0.534414	0.427076	OG0003568	GO:0005515	35
BdiBd21-3.1G0579800	0.943461	0.710437	0.410051	0.658428	0.974595	0.722983	OG0013983		3447
BdiBd21-3.4G0544800	7.03996	7.01873	6.54468	9.88952	8.22007	10.8991	OG0002434		87
BdiBd21-3.1G0417200	0.127689	0.0342834	0	0.174907	0.0962109	0.130813	OG0000028
BdiBd21-3.4G0017101	0.0909165	0	0	0.144348	0.0351068	0.0735912	OG0000120
BdiBd21-3.2G0771700	0.0402318	0.131061	0.0596772	0.0338082	0	0.0785592	OG0033900
BdiBd21-3.3G0728800	32.4887	37.4617	39.3403	37.6705	47.6873	43.5923	OG0012688		6729
BdiBd21-3.4G0001400	7.28822	8.27879	8.10769	9.91078	10.3583	10.2405	OG0002481		1996
BdiBd21-3.3G0098200	0	0	0	0	0	0	OG0000006
BdiBd21-3.4G0536800	39.5064	61.1175	44.5607	43.8873	48.8865	48.9136	OG0000353	GO:0005198,GO:0005515,GO:0005198,GO:0005515	1494
BdiBd21-3.4G0283900	0	0	0	0	0	0	OG0024767
BdiBd21-3.2G0460500	0	0	0	0	0	0	OG0034394
BdiBd21-3.4G0490500	0.0818643	0.0159504	0.102141	0	0.206249	0	OG0030312
BdiBd21-3.1G0978200	0.802334	1.27121	0.800101	1.63596	1.38224	1.64625	OG0021672		129
BdiBd21-3.1G1022600	1.51089	2.86513	1.30016	2.23871	1.7469	2.45414	OG0010008	GO:0003700,GO:0005515,GO:0003700,GO:0005515	2000
BdiBd21-3.5G0025000	1.46075	2.34661	1.69575	2.47407	1.75903	2.76542	OG0000588		1498
BdiBd21-3.3G0341275	0	0.0137317	0.0903345	0	0.0138355	0.0375258	OG0035514
BdiBd21-3.3G0528650	0.0953922	0.19836	0.0955847	0.110449	0.0900961	0.0977475	OG0035513
BdiBd21-3.2G0166300	0	0	0	0	0	0	OG0011252
BdiBd21-3.3G0385050	0.0349614	0.00871499	0	0.0146897	0	0.0118774	OG0035699
BdiBd21-3.3G0091600	0.218048	0.289239	0.108528	0.419663	0.35008	0.515604	OG0035979		5679
BdiBd21-3.2G0230150	0	0	0	0.0549947	0	0	OG0000243
BdiBd21-3.1G0633000	12.1087	12.2534	10.8345	12.3062	11.5142	11.1564	OG0007377		3529
BdiBd21-3.1G0928900	0	0	0.0142968	0	0	0	OG0004212
BdiBd21-3.3G0510300	113.174	112.409	135.807	116.696	115.774	120.753	OG0000320
BdiBd21-3.5G0022400	0.882911	1.46469	1.01401	1.00818	1.14277	1.47725	OG0002603		2278
BdiBd21-3.3G0003700	0	0	0	0	0	0	OG0035457
BdiBd21-3.1G0698900	161.37	141.756	128.286	154.795	128.545	134.34	OG0011086		1871
BdiBd21-3.2G0334150	2.05341	1.89025	2.60271	2.23814	1.28621	2.41018	OG0034794		4791
BdiBd21-3.4G0579700	0.167048	0.145537	0.251592	0.265672	0.221579	0.170612	OG0018013
BdiBd21-3.1G0984301	0	0.0332443	0	0.0496572	0	0	OG0008722	GO:0003676,GO:0004518,GO:0003676,GO:0004518
BdiBd21-3.2G0139300	0.0388321	0	0.0619233	0	0.0288354	0.0559454	OG0001368
BdiBd21-3.4G0269600	0.419107	0.0922205	1.1192	0.0761037	1.02498	0.345886	OG0004818		1876
BdiBd21-3.3G0659600	0	0	0	0	0	0	OG0003302
BdiBd21-3.2G0753500	0.113987	0.285939	0.08539	0.223469	0.142906	0.124513	OG0001473	GO:0003677
BdiBd21-3.3G0166600	0	0	0	0.0265209	0.019462	0	OG0001255	GO:0003677,GO:0003700,GO:0003677,GO:0003700
BdiBd21-3.3G0703900	6.61286	6.37163	7.67372	6.93596	8.515	6.65096	OG0003370	GO:0005737	556
BdiBd21-3.1G0531500	10.659	7.53412	7.46281	6.02631	5.76717	5.84416	OG0015520		1810
BdiBd21-3.2G0535400	0	0	0	0	0	0	OG0021311
BdiBd21-3.4G0452900	0.0174348	0	0.0211592	0	0.010268	0	OG0006304
BdiBd21-3.2G0142250	1.08455	1.33223	1.25364	1.62543	0.54785	2.16138	OG0009561		496
BdiBd21-3.4G0216450	0.133394	0.0908001	0.106508	0.200116	0.0637302	0.0268482	OG0030106
BdiBd21-3.5G0018000	0.135946	0.139565	0.102782	0.120431	0.125837	0.187276	OG0005066
BdiBd21-3.2G0129900	0.956975	0.802192	0.78785	0.778643	0.691793	0.389786	OG0015672	GO:0005515	4452
BdiBd21-3.1G0694600	4.89502	6.3922	3.7552	6.09539	5.39776	4.4867	OG0010711		3638
BdiBd21-3.3G0244400	0.100359	0.14736	0.111744	0.0392026	0.0467402	0.118006	OG0016640	GO:0003677
BdiBd21-3.4G0378432	0	0.193453	0	0	0.0938405	0	OG0030077
BdiBd21-3.4G0594500	4.20788	5.23223	4.94285	6.16547	3.53885	5.46593	OG0008690		7825
BdiBd21-3.2G0702100	1.66755	2.79796	2.04051	2.49789	2.38442	2.70867	OG0002861		5363
BdiBd21-3.3G0498633	8.89007	9.57013	7.86674	11.9507	9.4685	9.7508	OG0036611		6341
BdiBd21-3.4G0124100	3.81779	4.72135	2.82934	4.12116	2.9644	3.26008	OG0021330		2370
BdiBd21-3.4G0120200	57.1856	41.1893	76.1114	50.4263	87.3498	51.6641	OG0009033		75
BdiBd21-3.4G0287500	0.608336	1.29086	0.528834	0.718856	0.604347	0.692196	OG0008797	GO:0005515	7297
BdiBd21-3.3G0371300	0	0	0	0	0	0	OG0000088
BdiBd21-3.3G0141001	0.275148	0.417264	0.228337	0.569073	0.0642519	0.692826	OG0037012		5
BdiBd21-3.1G0782900	0	0	0	0	0	0	OG0006890
BdiBd21-3.2G0348000	0.391475	0.18196	0.501682	0.161169	0.632485	0.261309	OG0034950		43
BdiBd21-3.1G1015100	1.40133	2.23097	1.34239	2.14189	1.31512	1.35666	OG0007088	GO:0005515	7
BdiBd21-3.5G0259500	0	0.0521903	0	0	0.0825344	0	OG0031264
BdiBd21-3.3G0430600	0	0	0	0	0	0	OG0000486
BdiBd21-3.2G0723900	0.29636	0.356599	0.159277	0.287416	0.241513	0.294648	OG0034563		5391
BdiBd21-3.2G0133900	10.0177	12.8334	9.64314	18.8343	9.28174	16.9062	OG0018222		5
BdiBd21-3.3G0004800	0	0	0	0	0	0	OG0002469
BdiBd21-3.3G0673100	0.0497309	0.0711535	0.0372088	0.0454895	0.10419	0.0226433	OG0001150	GO:0003676
BdiBd21-3.3G0441900	9.70008	11.6705	9.41123	15.8519	8.42256	16.8065	OG0008175	GO:0005515	3
BdiBd21-3.5G0199700	4.11342	6.29658	3.98221	6.24189	4.99146	5.87374	OG0031335		8193
BdiBd21-3.4G0564600	1.15772	0.433764	2.98729	0.461425	3.71143	0.367468	OG0000247		1
BdiBd21-3.1G0197000	36.3226	28.4622	32.8913	18.9447	20.7114	19.0121	OG0006935		2
BdiBd21-3.2G0356000	0.244551	0.389105	0.368756	0.386636	0.384336	0.304692	OG0019448		4828
BdiBd21-3.1G0067600	0.0757271	0.11143	0.0683598	0.207388	0.0375809	0.139826	OG0002786	GO:0005515
BdiBd21-3.1G0045300	0.0907783	0.104316	0.0249164	0	0.052138	0.0130379	OG0000584	GO:0005215
BdiBd21-3.4G0318000	0	0	0	0	0	0	OG0000095
BdiBd21-3.2G0058600	30.4888	37.172	27.3268	42.7035	38.6529	45.6945	OG0001220	GO:0003824,GO:0005515,GO:0003824,GO:0005515	1316
BdiBd21-3.3G0006000	3.16343	4.06026	2.92908	4.12427	2.82353	4.19619	OG0005885	GO:0005515	0
BdiBd21-3.1G0708900	3.19806	3.76994	2.8521	3.81248	2.29509	3.80722	OG0006405		8
BdiBd21-3.2G0412700	1.81663	8.99463	3.85585	5.96716	5.73976	4.40422	OG0005567		820
BdiBd21-3.3G0125500	6.94886	1.82005	14.5678	0.799656	12.1689	0.830618	OG0003604		1
BdiBd21-3.1G0002400	0	0	0	0	0	0	OG0018586
BdiBd21-3.4G0020900	0.959003	1.16835	0.923009	1.00252	1.15385	0.8903	OG0030602		6877
BdiBd21-3.1G0336200	9.61124	11.6252	9.76884	15.9658	10.4716	14.4844	OG0018722		523
BdiBd21-3.5G0321400	0	0.00981161	0	0	0.0310324	0	OG0021488
BdiBd21-3.3G0296100	0.0936598	0.0217873	0	0.202808	0.0388127	0.11884	OG0000319
BdiBd21-3.3G0492200	2.60994	3.15728	2.66766	3.33552	3.0442	3.71335	OG0012867	GO:0005794	6330
BdiBd21-3.1G0636100	0	0	0	0	0	0	OG0001572
BdiBd21-3.2G0470200	0.58107	0.47159	0.559692	0.366074	0.594707	0.5557	OG0001178		5025
BdiBd21-3.1G0519350	0	0	0	0	0	0	OG0033408
BdiBd21-3.3G0174450	0.263792	0.622015	0.575595	0.156794	0.437263	0.923958	OG0035741		5815
BdiBd21-3.1G0184050	0.50187	0.44337	0.2544	0.596205	0.20724	0.734201	OG0033174		196
BdiBd21-3.4G0147200	0.0329206	0.193019	0.0157026	0.116315	0.160302	0.112929	OG0024759
BdiBd21-3.3G0622900	1.83752	2.00059	2.29927	2.00587	2.78399	2.76153	OG0012327		40
BdiBd21-3.4G0626900	0	0	0	0	0	0	OG0030192
BdiBd21-3.4G0252500	0.726657	0.810126	0.624656	1.57935	1.06273	1.40628	OG0002481		12
BdiBd21-3.2G0309700	20.2883	22.9063	17.2575	15.1727	11.2202	12.9389	OG0007634		2
BdiBd21-3.4G0445000	0	0.0451298	0	0	0.0789152	0	OG0003167
BdiBd21-3.3G0116400	0	0.131736	0	0	0	0	OG0036059
BdiBd21-3.3G0365366	0.329674	0.223279	0.492819	0.319419	0.446849	0.548513	OG0036188	GO:0000166	6126
BdiBd21-3.5G0127600	0	0	0	0	0	0	OG0002077	GO:0005515
BdiBd21-3.3G0519100	0	0	0	0	0	0	OG0017151	GO:0003700
BdiBd21-3.2G0803100	1.93091	2.42866	2.06309	2.60364	2.62317	2.68719	OG0019353		5514
BdiBd21-3.3G0291350	1.70289	2.0219	1.66273	0.736334	2.14556	0.167525	OG0016030		1185
BdiBd21-3.1G0506400	9.5021	10.2027	9.36886	4.72751	9.78839	4.39928	OG0007185		2
BdiBd21-3.1G0033400	0.753065	1.61401	0.597524	2.16547	0.917409	1.74306	OG0010122		0
BdiBd21-3.3G0237300	0	0	0	0.0269255	0	0	OG0001566	GO:0005515
BdiBd21-3.2G0024400	0	0	0	0	0	0	OG0007602	GO:0003676
BdiBd21-3.1G0894200	0	0	0	0	0	0	OG0005036	GO:0000166,GO:0003676,GO:0000166,GO:0003676
BdiBd21-3.1G0286000	1.33126	1.86221	1.18192	2.01611	1.39588	2.14994	OG0005195	GO:0003676	0
BdiBd21-3.1G0219350	0	0.101642	0	0	0	0	OG0032254
BdiBd21-3.2G0650600	0.0376252	0.0469125	0.0166454	0.0247925	0.0214692	0.0218726	OG0019049	GO:0003824
BdiBd21-3.4G0273500	0	0	0	0	0	0	OG0013600
BdiBd21-3.4G0116500	0.0354894	0.0140859	0.0294399	0.0220434	0.0790597	0.0714778	OG0024844
BdiBd21-3.4G0446800	0	0	0	0	0	0	OG0021286
BdiBd21-3.1G0968500	0.0508195	0.0543623	0.0637665	0.0851082	0.0484416	0.0332778	OG0014699	GO:0005515
BdiBd21-3.3G0057500	2.04368	2.75739	1.98346	2.99887	3.10873	3.04804	OG0012674	GO:0005515	1934
BdiBd21-3.3G0096900	1.09036	1.76324	1.26763	1.43322	2.15954	1.43017	OG0019697		44
BdiBd21-3.2G0450900	20.4856	19.5865	21.0786	20.5276	22.2526	21.653	OG0012028	GO:0000166,GO:0003676,GO:0005737,GO:0000166,GO:0003676,GO:0005737,GO:0000166,GO:0003676,GO:0005737
BdiBd21-3.3G0356700	3.74688	3.8814	5.93438	5.08713	7.76774	6.00114	OG0019686		4
BdiBd21-3.1G0825700	0.195189	0.209244	0.439774	0.189663	0.486896	0.132958	OG0004242		1917
BdiBd21-3.4G0174400	0	0	0	0	0	0	OG0030324
BdiBd21-3.2G0268800	0.0178989	0.0160966	0	0.0143647	0.053945	0.0280861	OG0003709
BdiBd21-3.4G0172400	3.42184	5.93808	2.72913	7.40326	0.936677	8.92217	OG0024650		25
BdiBd21-3.1G0174501	0	0	0	0	0	0	OG0005438
BdiBd21-3.3G0620900	10.2336	5.52936	9.5921	9.53287	30.4162	14.4566	OG0002107		110
BdiBd21-3.1G0013800	0.0100017	0.0766749	0.0880561	0.280876	0.228819	0.0898568	OG0002770	GO:0003824	80
BdiBd21-3.2G0596600	0	0	0	0.01775	0	0	OG0009571	GO:0005515
BdiBd21-3.4G0317300	0	0	0	0	0	0	OG0030608	GO:0003677
BdiBd21-3.5G0332300	0	0	0	0.0112861	0	0.0112029	OG0001371	GO:0005515
BdiBd21-3.1G0659500	0.180798	0.286864	0.242689	0.291592	0.114811	0.326965	OG0032520
BdiBd21-3.5G0274000	0.479892	0.601855	0.47829	0.557658	0.41285	0.612134	OG0005112		8317
BdiBd21-3.4G0046800	4.70975	5.68621	4.26681	5.78187	5.70388	3.77736	OG0013626	GO:0005515	230
BdiBd21-3.1G1052000	0.0175171	0.0869749	0.076754	0.144384	0.124382	0.174712	OG0021561
BdiBd21-3.2G0039600	0.536886	0.614931	0.248408	0.746273	0.665517	0.44394	OG0007524		4304
BdiBd21-3.2G0625500	0.645069	0.808606	0.909251	0.742697	1.44401	1.0827	OG0015968	GO:0003700	5240
BdiBd21-3.3G0642000	7.89828	13.2615	7.33818	7.48336	7.03152	7.18703	OG0006987		19
BdiBd21-3.3G0112700	1.28763	2.5645	1.92212	1.94206	3.2282	1.88898	OG0016902		5715
BdiBd21-3.3G0214900	0.548256	0.470677	1.28865	0.412565	1.58634	0.461124	OG0022104	GO:0003824	4
BdiBd21-3.3G0563900	5.79633	9.15432	5.46077	8.81694	9.93685	9.40713	OG0002592		1545
BdiBd21-3.5G0324800	0.0646626	0.0513297	0	0.065432	0.0541678	0	OG0021503	GO:0003677,GO:0003700,GO:0003677,GO:0003700
BdiBd21-3.4G0407800	0.470545	0.605973	0.536342	0.357556	1.35856	0.272587	OG0013983		579
BdiBd21-3.3G0653100	0.500475	0.960749	0.304512	0.511647	0.125396	0.638576	OG0019598	GO:0005515	21
BdiBd21-3.5G0328900	0	0	0	0	0	0	OG0002571
BdiBd21-3.3G0684350	0	0	0	0	0	0.119162	OG0035666
BdiBd21-3.1G0133400	3.78404	2.40282	4.95653	2.0187	8.44192	1.25407	OG0009885		1
BdiBd21-3.1G0806300	0.0590935	0.130333	0	0.215469	0.104569	0.0964831	OG0009789
BdiBd21-3.3G0308300	0.391521	0.557692	0.372234	0.404117	0.480899	0.429808	OG0008885	GO:0003677	6047
BdiBd21-3.4G0226100	0	0	0	0	0	0	OG0005028
BdiBd21-3.1G0032200	13.5172	9.63914	14.6649	11.3723	15.8951	11.3253	OG0014610		1
BdiBd21-3.1G0971800	0.56077	0.626107	0.548541	0.661661	0.449202	0.528652	OG0018492	GO:0003677	4108
BdiBd21-3.2G0497901	0.369792	0.556287	0.496159	0.640461	0.471724	0.766939	OG0021448		210
BdiBd21-3.3G0202400	3.17444	3.7064	3.08996	3.74784	2.94234	4.36908	OG0021713	GO:0005515	5867
BdiBd21-3.3G0334000	8.96398	10.8718	9.01769	13.2752	10.1683	13.0295	OG0012460		3
BdiBd21-3.2G0130801	24.0324	39.6733	19.0477	54.7058	14.7277	37.4574	OG0034357		0
BdiBd21-3.3G0134900	0	0	0	0	0	0	OG0035869
BdiBd21-3.1G0437400	4.66268	6.00317	5.05977	6.9162	5.44139	7.34483	OG0006865	GO:0005515	1120
BdiBd21-3.1G0015500	0	0.0521903	0	0	0	0	OG0033045
BdiBd21-3.4G0436200	2.19066	2.73199	2.99841	4.82449	9.03323	1.93255	OG0008703		1380
BdiBd21-3.1G0369600	0	0	0	0	0	0	OG0025020
BdiBd21-3.4G0562600	4.66482	5.81408	4.51019	3.32169	2.55791	2.54884	OG0002437		2
BdiBd21-3.1G0931900	2.19951	2.30236	2.38619	3.45736	2.01933	3.17067	OG0032289	GO:0003677	1187
BdiBd21-3.5G0248100	0	0	0	0.0124293	0	0	OG0014376
BdiBd21-3.1G0948800	11.9389	15.9035	12.6725	16.5582	14.3469	17.0055	OG0018545		436
BdiBd21-3.1G0275600	2.11932	3.48805	1.16526	3.63863	2.17423	2.52838	OG0000292		1062
BdiBd21-3.1G0257600	0	0	0	0	0	0	OG0006830
BdiBd21-3.1G0190200	7.50577	8.0643	7.14137	8.04572	7.13052	7.51406	OG0010282	GO:0005515	197
BdiBd21-3.1G0439900	0	0.0900307	0	0.0595378	0.0395129	0	OG0004193
BdiBd21-3.3G0443050	1.11226	1.49891	0.931064	1.65363	0.964616	1.71618	OG0012895		2117
BdiBd21-3.3G0296400	0.652146	0.717112	0.901332	0.724807	1.37913	0.790221	OG0035437		6028
BdiBd21-3.3G0418850	0	0.509001	0	0.480592	0.317395	0.443482	OG0035908
BdiBd21-3.3G0402800	0.176454	0.144683	0.201343	0.103396	0.0994971	0.0674261	OG0036690
BdiBd21-3.3G0690032	0.801387	0.291212	0.68267	0.399905	0.501252	0.510672	OG0036904		322
BdiBd21-3.3G0408600	0	0	0	0	0	0	OG0000020
BdiBd21-3.3G0303300	1.05977	1.18146	1.04756	1.27638	1.16189	1.39555	OG0012792	GO:0003723	1170
BdiBd21-3.3G0179600	20.0246	28.8488	19.8814	25.6866	26.6967	22.7026	OG0012248		5827
BdiBd21-3.2G0674900	138.048	164.976	134.784	159.685	162.394	130.958	OG0012016		2244
BdiBd21-3.1G0311900	0	0	0	0	0	0	OG0021566	GO:0005515
BdiBd21-3.3G0646600	0.0479158	0	0.104552	0.0348861	0.0794255	0	OG0001121
BdiBd21-3.1G0944250	1.54261	1.78312	1.69105	1.94317	2.08581	1.71734	OG0032281		4054
BdiBd21-3.3G0685300	6.19359	7.96728	7.30461	7.69676	7.80675	9.1773	OG0019812		1036
BdiBd21-3.2G0037500	8.77018	10.2106	9.6397	13.016	10.0003	11.8906	OG0019201		709
BdiBd21-3.5G0255066	0.52847	1.07775	0	0.924468	0	1.55758	OG0031500
BdiBd21-3.5G0009750	4.99026	7.16447	5.32346	7.70189	3.91393	7.14123	OG0031041		38
BdiBd21-3.4G0059500	0	0	0	0	0	0	OG0021383	GO:0005515,GO:0005634,GO:0005515,GO:0005634
BdiBd21-3.2G0805900	7.09297	7.72779	6.59072	9.79269	7.50134	9.93099	OG0011181	GO:0005515,GO:0005634,GO:0005515,GO:0005634	3
BdiBd21-3.2G0155900	20.587	19.7817	22.7595	21.4897	24.282	26.1414	OG0003382		4496
BdiBd21-3.5G0307100	0	0	0	0	0	0	OG0031492
BdiBd21-3.2G0212300	0.133581	0.15258	0.136565	0.249115	0.135298	0.11512	OG0013653	GO:0003824
BdiBd21-3.4G0350300	0	0	0	0	0	0	OG0000002
BdiBd21-3.5G0234900	0	0	0	0	0	0	OG0030895
BdiBd21-3.1G0245000	10.3471	14.6506	13.0306	13.4098	11.4819	16.5363	OG0001697		1048
BdiBd21-3.2G0783800	9.54577	6.17384	18.5374	6.15311	27.2926	9.87657	OG0016315		4
BdiBd21-3.1G0351500	7.50524	7.6052	6.91343	8.38017	6.96835	8.92593	OG0032135		743
BdiBd21-3.4G0352100	12.6155	13.6997	10.6848	11.4467	13.2259	11.4598	OG0030333		2264
BdiBd21-3.5G0151800	0	0	0	0	0	0	OG0031445
BdiBd21-3.3G0282000	7.46105	8.20423	9.54417	9.11382	14.9325	8.98593	OG0012662		6012
BdiBd21-3.1G0828200	0	0.0135403	0	0.0172988	0.0768205	0.0514877	OG0000600	GO:0005576
BdiBd21-3.5G0057500	43.9729	100.209	38.435	83.2092	35.7976	72.2441	OG0003301		0
BdiBd21-3.3G0121100	0.412737	0.815498	1.05343	1.03626	0.0726711	0.847487	OG0002857		1236
BdiBd21-3.1G0762000	6.33825	6.65454	6.00164	6.65291	7.55217	7.30418	OG0007071	GO:0005515	3763
BdiBd21-3.2G0243900	8.21066	10.6624	21.351	12.4793	13.1499	21.3362	OG0004566	GO:0003700	91
BdiBd21-3.3G0557900	4.74685	7.68956	1.38935	2.98074	0.521876	1.76671	OG0001347		8
BdiBd21-3.2G0129500	3.41842	6.29636	4.23071	5.95259	3.05263	5.14926	OG0001248	GO:0003723	2070
BdiBd21-3.2G0245000	0	0	0	0	0	0	OG0022002
BdiBd21-3.5G0036400	0.768642	1.0888	2.01833	2.12074	0.723855	1.14079	OG0000159		7942
BdiBd21-3.2G0040200	0.0184252	0.0409595	0	0.0252806	0.0185106	0.0233943	OG0001812
BdiBd21-3.5G0070800	3.44979	5.08144	4.45328	4.85252	2.9103	3.80011	OG0024866		7983
BdiBd21-3.1G0261500	0	0	0	0	0	0	OG0025248	GO:0005198,GO:0005618,GO:0005198,GO:0005618
BdiBd21-3.4G0033200	0	0	0	0	0	0	OG0003983
BdiBd21-3.4G0141200	0	0	0.0225884	0	0	0	OG0017985
BdiBd21-3.1G0109700	0	0	0	0	0	0	OG0018537	GO:0003700
BdiBd21-3.5G0214200	0.945625	1.25156	1.78085	0.768348	2.02743	1.28677	OG0014398		4
BdiBd21-3.2G0433500	6.21204	11.0991	7.35765	10.1556	10.2368	12.2256	OG0022016		151
BdiBd21-3.5G0211500	0.0566347	0.0183846	0.124649	0.0234356	0.160305	0.136521	OG0014406
BdiBd21-3.4G0510700	34.1012	72.2631	27.4915	90.7181	17.8749	74.9586	OG0002514		0
BdiBd21-3.3G0268300	1.07023	1.04576	0.659275	0.992934	0.513141	0.974612	OG0036597		5984
BdiBd21-3.2G0491400	2.39139	2.31065	2.23098	2.46547	2.65352	2.49751	OG0003708		5063
BdiBd21-3.1G0461400	0	0	0	0	0	0	OG0033109
BdiBd21-3.2G0015900	0.52328	0.547283	0.577002	0.591431	0.675841	0.701582	OG0015568		4269
BdiBd21-3.1G0624900	0	0	0	0	0	0	OG0000426
BdiBd21-3.2G0314800	0.453729	0.120366	0.492169	0.0570262	0.444093	0.086522	OG0005624		1
BdiBd21-3.2G0098500	35.9395	35.9697	33.7796	49.8583	43.9838	50.5361	OG0016231		1588
BdiBd21-3.4G0177000	0	0	0	0	0	0	OG0009011
BdiBd21-3.2G0552300	0.0160878	0.0289357	0.0982949	0.109283	0.069366	0.289406	OG0000757
BdiBd21-3.4G0035300	8.01679	10.1718	7.9978	9.85127	7.52804	10.1391	OG0013613		1189
BdiBd21-3.5G0188100	1.44834	1.66631	1.50352	1.85805	1.78361	1.84333	OG0009452		8174
BdiBd21-3.1G0709900	0	0	0	0	0.083385	0	OG0032503
BdiBd21-3.2G0131000	2.73966	3.53583	6.02214	2.68724	5.97149	3.32782	OG0007530	GO:0005515	28
BdiBd21-3.4G0494900	0.281763	0.340049	0.0295618	0.214156	0.0462249	0.18637	OG0004858		1969
BdiBd21-3.1G0541500	0	0	0	0	0	0	OG0006396
BdiBd21-3.1G0687100	41.5495	34.6985	47.5757	36.1465	53.4514	24.0081	OG0033685		1
BdiBd21-3.1G0960200	0	0.0490387	0.118978	0.0312558	0.0746867	0.215299	OG0033047
BdiBd21-3.3G0020600	0.52396	0.647171	0.449559	0.477771	0.568	0.530381	OG0016752	GO:0003824	5562
BdiBd21-3.4G0349700	0	0	0	0.0180626	0	0	OG0003153	GO:0003824
BdiBd21-3.3G0050300	71.1618	76.3278	69.7897	94.8305	106.161	97.4674	OG0000270	GO:0005515	2295
BdiBd21-3.2G0221300	0.146366	0.185369	0.169182	0.110606	0.066335	0.0763431	OG0034513
BdiBd21-3.1G0858800	19.9405	29.0711	27.2141	35.282	31.6703	34.8673	OG0010677		429
BdiBd21-3.5G0225000	0	0	0	0	0	0	OG0031523
BdiBd21-3.5G0231600	0	0	0	0	0	0	OG0002463
BdiBd21-3.3G0438400	9.89481	12.3659	11.1125	16.5829	15.3116	14.544	OG0003421		1386
BdiBd21-3.1G0163800	0.0249354	0.00577086	0.038973	0.0432598	0.0610009	0.0693166	OG0021660
BdiBd21-3.4G0009600	0	0	0	0	0	0	OG0014051
BdiBd21-3.3G0223500	7.96333	9.00116	9.44927	10.361	11.0427	12.602	OG0007982		931
BdiBd21-3.4G0529300	0	0	0	0.00514885	0.00754002	0	OG0008832	GO:0005488
BdiBd21-3.3G0412050	0.334444	0.502464	0.232654	0.780362	0.377559	0.643502	OG0025639		15
BdiBd21-3.2G0771199	1.14083	0.885391	1.48487	0.937077	0.53462	0.820495	OG0001481		5467
BdiBd21-3.1G0948600	6.28007	6.17163	6.74891	7.10711	6.87086	7.52635	OG0011089		49
BdiBd21-3.2G0599600	0	0	0	0	0	0	OG0006163	GO:0003677
BdiBd21-3.4G0183700	0	0	0	0	0	0	OG0000107
BdiBd21-3.3G0744100	0.0163873	0	0	0	0.0148889	0.0111921	OG0019673
BdiBd21-3.2G0701200	0.522217	0.597097	0.39394	0.542723	0.52329	0.521364	OG0025466		5362
BdiBd21-3.1G0898800	0	0	0	0	0	0	OG0013587
BdiBd21-3.2G0599800	6.759	7.81765	10.7034	7.84274	12.2778	13.4722	OG0016084		2218
BdiBd21-3.1G0962400	0	0	0	0.0194312	0	0	OG0000020
BdiBd21-3.3G0146600	0.227612	0.258455	0.0413328	0.442391	0.0708942	0.367863	OG0037096		5782
BdiBd21-3.1G0912300	9.48701	9.77466	10.3127	9.04649	8.91508	8.80572	OG0015271		43
BdiBd21-3.3G0764700	0	0	0	0	0	0	OG0021918
BdiBd21-3.1G0927600	6.53261	7.33555	3.8718	10.5995	4.00027	11.2792	OG0018699	GO:0005215	0
BdiBd21-3.1G0733600	0	0	0	0	0	0	OG0007035
BdiBd21-3.1G0243500	0.301057	0.331122	0.409435	0.345851	0.30334	0.554381	OG0033456		2913
BdiBd21-3.4G0416500	3.84801	4.71266	3.36766	5.083	3.71393	4.73305	OG0003173		632
BdiBd21-3.1G0177000	1.7827	1.44983	1.98695	0.925116	4.64533	0.712814	OG0032536		1628
BdiBd21-3.3G0181800	0.121784	0.0176127	0.150508	0.067355	0.302927	0	OG0001196
BdiBd21-3.2G0094200	0	0	0	0	0	0	OG0015803
BdiBd21-3.1G0185900	0.0820977	0.118061	0.102598	0.11369	0.138753	0.155136	OG0010968
BdiBd21-3.3G0590900	0	0	0	0	0	0.00718026	OG0025655	GO:0003676
BdiBd21-3.5G0012000	0.693921	0.362533	0.625968	0.650517	0.466994	0.887531	OG0001662		2358
BdiBd21-3.5G0190100	8.72175	10.5423	8.05079	10.9645	8.9317	12.9136	OG0001005	GO:0005488	1441
BdiBd21-3.2G0293200	0.0335267	0.0202089	0	0	0	0.0137711	OG0012103
BdiBd21-3.4G0054600	0.46161	0.589901	0.462038	0.438826	0.55976	0.452745	OG0002452	GO:0005515	6942
BdiBd21-3.2G0094100	0.144657	0.1707	0.130717	0.206651	0.122833	0.144554	OG0034178
BdiBd21-3.4G0141900	0.176788	0.191656	0.0661344	0.301431	0.104883	0.180044	OG0000648
BdiBd21-3.2G0646500	0.164189	0.236904	0.268299	0.222698	0.262794	0.138906	OG0011431	GO:0003677
BdiBd21-3.1G0729300	0	0	0	0	0	0	OG0000665
BdiBd21-3.2G0557000	0.757742	1.41082	0.728485	1.43353	0.556428	1.23805	OG0033819		7
BdiBd21-3.2G0786000	1.4897	0.973839	1.48973	1.14858	2.61634	1.14884	OG0005547		18
BdiBd21-3.5G0173900	0.868079	1.39968	0.752796	1.30849	0.854669	1.33112	OG0005088		7
BdiBd21-3.2G0695100	0.122227	0.0668501	0.260607	0.0918132	0.129628	0.0923483	OG0007499
BdiBd21-3.1G0166000	2.27646	3.68385	2.7488	3.99324	2.38593	4.61274	OG0018475	GO:0000166,GO:0003676,GO:0000166,GO:0003676	483
BdiBd21-3.1G0555900	4.41992	6.35141	3.7134	5.78393	7.34404	3.95881	OG0001734	GO:0003824	76
BdiBd21-3.3G0752200	9.99911	10.2906	10.6296	12.1003	10.791	13.5233	OG0016521		3
BdiBd21-3.4G0259800	0	0	0	0	0	0	OG0024710
BdiBd21-3.4G0412900	0	0	0	0	0	0	OG0013912
BdiBd21-3.5G0218800	0.125997	0.111651	0.144088	0.198319	0.120653	0.205896	OG0025013
BdiBd21-3.4G0012300	40.9152	29.1237	65.3651	30.2334	97.6349	12.6453	OG0004935		1
BdiBd21-3.1G1017700	0.045229	0.679558	0.101521	0.323692	0	0.291488	OG0011012
BdiBd21-3.2G0445400	0.0182685	0.0209915	0	0	0	0	OG0011975
BdiBd21-3.5G0113100	0	0	0	0	0	0	OG0000006
BdiBd21-3.2G0458900	0.644942	0.471748	0.493474	0.895124	0.651425	0.642476	OG0035344		4999
BdiBd21-3.3G0545500	18.2748	19.6057	14.4613	15.8577	10.1293	11.4222	OG0025440		16
BdiBd21-3.2G0546400	0.572193	0.345996	0.457401	0.698695	0.500664	0.733249	OG0002016		210
BdiBd21-3.3G0638500	0	0	0	0	0	0	OG0036679
BdiBd21-3.3G0792800	0	0	0	0	0.0310324	0	OG0012519
BdiBd21-3.2G0400900	0.00777098	0	0	0.0139068	0	0.00622258	OG0035229
BdiBd21-3.1G0823600	1.29019	2.10055	1.76127	1.79337	1.59499	1.82042	OG0009848	GO:0000166,GO:0005198,GO:0005622,GO:0000166,GO:0005198,GO:0005622,GO:0000166,GO:0005198,GO:0005622	1076
BdiBd21-3.1G0468500	0.160047	0.338768	0	0.172954	0.0149988	0.0961125	OG0005242
BdiBd21-3.4G0203800	0	0	0	0	0	0	OG0000046
BdiBd21-3.3G0614100	0	0	0	0	0	0	OG0012958
BdiBd21-3.3G0208700	5.15801	5.71618	4.74922	8.94579	6.91001	8.30094	OG0002840		5881
BdiBd21-3.3G0576000	0	0	0	0	0	0	OG0000006
BdiBd21-3.2G0518450	0	0	0	0	0	0	OG0007821
BdiBd21-3.1G0428701	2.71416	2.98397	2.13216	3.29272	3.51052	3.49859	OG0018703	GO:0005515	3183
BdiBd21-3.2G0099700	0.02157	0	0	0	0	0.0566992	OG0011190
BdiBd21-3.5G0159500	8.30185	17.5778	9.21061	17.0129	10.0143	15.6567	OG0005103		1200
BdiBd21-3.3G0505300	0	0	0	0	0	0	OG0008247
BdiBd21-3.5G0186700	1.10779	1.33647	1.3408	2.33853	1.86857	2.72361	OG0002623		1424
BdiBd21-3.1G0697200	0	0.0438515	0	0	0	0	OG0004227
BdiBd21-3.2G0062100	0.182736	0.338195	0.171121	0.175639	0.0947713	0.194936	OG0003606	GO:0005515
BdiBd21-3.3G0337200	0	0.0126465	0	0.015101	0	0	OG0001590	GO:0003676
BdiBd21-3.3G0726000	1.26259	1.1839	1.12548	1.35859	1.72888	1.25807	OG0022155		6724
BdiBd21-3.1G0378700	1.12342	1.58927	1.03019	1.89229	0.744385	2.04324	OG0031931		9
BdiBd21-3.1G0052000	0.988356	1.10603	0.880128	1.18669	0.979796	1.15234	OG0032643		2631
BdiBd21-3.1G0256400	5.05169	6.31557	4.81412	5.26409	4.47274	5.32567	OG0015399		679
BdiBd21-3.5G0280700	0.178324	0.232745	0.0599816	0.254319	0.0982445	0.253724	OG0000587
BdiBd21-3.4G0265500	3.48335	3.62453	3.13769	4.78055	3.54279	4.65389	OG0013658		7254
BdiBd21-3.3G0308500	0.403843	0.494253	0.462392	0.661761	0.586087	0.71412	OG0035786	GO:0003676,GO:0003723,GO:0003676,GO:0003723	1464
BdiBd21-3.4G0091400	1.64499	3.9318	1.94015	4.19867	3.84226	3.60746	OG0029730		7002
BdiBd21-3.1G0334200	0.112007	0.178787	0.0818693	0.17452	0.0728624	0.168009	OG0000283
BdiBd21-3.3G0640600	3.76059	4.36195	3.64985	4.69192	3.8118	5.29705	OG0016412		2345
BdiBd21-3.1G0018600	4.72311	7.77138	7.32049	7.37644	9.12478	7.80122	OG0003118		2566
BdiBd21-3.1G0489500	0.0613822	0.597691	0	0.290547	0.111539	0.161781	OG0032435
BdiBd21-3.2G0201700	0	0	0	0	0	0.014996	OG0025398
BdiBd21-3.1G0367300	1.81586	1.85307	1.69231	1.43882	1.35244	1.37004	OG0025153		3105
BdiBd21-3.5G0090100	19.4426	21.0122	19.0518	28.1515	27.2651	29.6574	OG0001003		1424
BdiBd21-3.1G0505100	2.94004	3.58551	5.68634	3.78617	10.8843	6.31594	OG0032291	GO:0005515	200
BdiBd21-3.2G0718600	1.34634	1.50447	2.65819	2.26697	3.59687	2.60434	OG0007701		5384
BdiBd21-3.1G0011100	1.09847	2.88513	1.1892	3.41182	1.2159	3.75759	OG0005506		226
BdiBd21-3.1G0218000	4.44704	4.6596	4.91874	5.17737	5.56401	5.5622	OG0014533		49
BdiBd21-3.2G0462700	3.1523	3.99768	2.88366	4.54719	3.98127	4.6779	OG0007825	GO:0000166,GO:0003676,GO:0003723,GO:0005634,GO:0005737,GO:0000166,GO:0003676,GO:0003723,GO:0005634,GO:0005737,GO:0000166,GO:0003676,GO:0003723,GO:0005634,GO:0005737,GO:0000166,GO:0003676,GO:0003723,GO:0005634,GO:0005737,GO:0000166,GO:0003676,GO:0003723,GO:0005634,GO:0005737	5008
BdiBd21-3.1G0307000	11.7241	17.5169	9.92581	5.46348	8.20311	5.25907	OG0000884		2
BdiBd21-3.3G0509500	15.9577	12.5609	18.0334	6.14541	12.1551	5.46869	OG0003263	GO:0005215	2
BdiBd21-3.1G0795200	5.90458	6.09073	6.38389	7.59959	6.99657	11.5671	OG0006780		1074
BdiBd21-3.1G0001600	0	0	0	0	0	0	OG0008736
BdiBd21-3.5G0174800	0.582814	1.03616	0.524296	1.06889	0.811198	0.897149	OG0006415	GO:0005515	8147
BdiBd21-3.1G0382900	0	0	0	0	0	0	OG0006191
BdiBd21-3.1G0603400	0	0	0	0	0	0	OG0000352
BdiBd21-3.3G0764100	4.55803	5.2258	3.66975	5.80722	2.90482	4.994	OG0016776		8
BdiBd21-3.2G0272200	4.62546	4.14505	5.78877	2.24393	5.07417	2.59191	OG0005632		131
BdiBd21-3.2G0728700	0.430672	0.550449	0.144709	0.314261	0.145989	0.299864	OG0016167		82
BdiBd21-3.3G0398100	0	0	0	0	0	0	OG0037144
BdiBd21-3.2G0529400	4.55964	6.03041	11.0941	5.39972	11.0476	10.7397	OG0015813		4
BdiBd21-3.1G0091400	24.2048	31.4132	22.6263	29.7577	27.6845	34.0858	OG0000113	GO:0005198	1572
BdiBd21-3.1G0415000	0	0	0	0	0	0	OG0004923
BdiBd21-3.1G0253100	2.18081	3.39941	2.03989	3.20333	2.77928	3.2103	OG0007355		1675
BdiBd21-3.2G0557100	12.9655	25.067	8.24437	28.6566	10.5668	26.7634	OG0022049		0
BdiBd21-3.1G0555850	0.214577	0.197882	0.159601	0.390726	0.266718	0.392837	OG0003517
BdiBd21-3.3G0755000	1.07677	1.08706	0.955293	1.49157	1.12317	1.60726	OG0036186		6770
BdiBd21-3.1G0372800	3.76533	4.62755	3.4709	5.34102	4.36133	5.16042	OG0007107		528
BdiBd21-3.3G0771500	20.9718	23.3207	20.7369	24.8965	19.0439	26.5956	OG0012119	GO:0005634	218
BdiBd21-3.4G0129601	0.604506	0.766987	0.719115	0.88035	0.792307	1.19349	OG0000053		7063
BdiBd21-3.4G0296050	0.0121771	0.00393336	0.00426296	0.00260583	0.001908	0.00482281	OG0001123	GO:0005515
BdiBd21-3.1G0327900	0	0	0	0	0	0	OG0006759
BdiBd21-3.4G0434900	0.567145	0.503204	0.441575	0.474958	0.449549	0.412796	OG0000036	GO:0003677,GO:0005634,GO:0003677,GO:0005634	7557
BdiBd21-3.5G0029501	0	0.00957597	0	0	0	0	OG0030982
BdiBd21-3.2G0294600	0.235757	0.172309	0.173828	0.234204	0.32556	0.184831	OG0016202
BdiBd21-3.3G0555450	0.398448	0.254829	0.388474	0.359186	0.223766	0.736451	OG0036929		932
BdiBd21-3.4G0340600	0	0	0	0	0	0	OG0002012
BdiBd21-3.3G0459900	0.0108394	0.0116411	0	0	0.0305863	0	OG0001166
BdiBd21-3.1G0633600	0	0.0962272	0.0930441	0.158134	0.191098	0.0824415	OG0033452
BdiBd21-3.1G0933350	0.268957	0.222697	0.535146	0.378186	0.416617	0.455982	OG0032373		4029
BdiBd21-3.2G0000700	0.683475	0.734956	0.880499	0.887905	0.759387	0.789007	OG0005189		4240
BdiBd21-3.2G0075100	17.8225	15.2488	17.8903	10.6428	31.4271	9.34008	OG0012010	GO:0003676,GO:0003677,GO:0003676,GO:0003677	6
BdiBd21-3.3G0259400	0.623423	0.727811	0.641162	0.711455	0.671402	1.01833	OG0019599	GO:0005618	2342
BdiBd21-3.4G0371900	8.87736	10.6482	8.98508	12.7137	10.4349	12.8441	OG0003176	GO:0003824	436
BdiBd21-3.3G0522400	0	0	0	0	0	0	OG0036042
BdiBd21-3.4G0560500	0.0665946	0.143565	0.154613	0.104852	0.0603305	0.141833	OG0001125
BdiBd21-3.3G0750900	0	0.0375786	0.0368794	0.0488027	0.103017	0.0486035	OG0016798
BdiBd21-3.3G0447100	0.0152923	0.0192395	0.0100611	0.0362833	0.00450309	0	OG0001432	GO:0000166,GO:0003676,GO:0000166,GO:0003676
BdiBd21-3.5G0013200	0.211078	0.134883	0.233768	0.152959	0.392958	0.336258	OG0031443		41
BdiBd21-3.4G0374800	3.96083	3.90183	3.73542	4.94631	5.03205	5.8638	OG0001135		88
BdiBd21-3.5G0184000	0.00292177	0.00335727	0.00655822	0	0.0106185	0.00796142	OG0021451	GO:0005215
BdiBd21-3.1G0807500	0.987602	1.62863	1.00979	1.38609	0.84572	1.65726	OG0018730		264
BdiBd21-3.2G0366100	0.5172	0.63236	0.285479	0.519275	0.401823	0.557564	OG0002283	GO:0000166,GO:0003676,GO:0003723,GO:0000166,GO:0003676,GO:0003723,GO:0000166,GO:0003676,GO:0003723	400
BdiBd21-3.4G0404600	0.219975	0.352768	0.164371	0.338337	0.200528	0.283803	OG0009236
BdiBd21-3.4G0583700	1.5972	2.10134	1.84487	2.51631	2.16333	2.57181	OG0002484	GO:0003700	1478
BdiBd21-3.1G1015000	2.31366	1.74898	2.79766	2.19558	3.1096	2.33474	OG0010389	GO:0005515	489
BdiBd21-3.3G0207900	0.206942	0.33165	0.358638	0.317008	0.493778	0.515552	OG0025590	GO:0003677,GO:0003700,GO:0003677,GO:0003700	1875
BdiBd21-3.5G0257100	3.55782	7.23376	2.25702	4.83358	3.15503	3.59882	OG0000102		115
BdiBd21-3.3G0757100	3.40806	4.46861	4.06397	5.34866	4.00833	5.64309	OG0006913	GO:0003676,GO:0003677,GO:0005634,GO:0003676,GO:0003677,GO:0005634,GO:0003676,GO:0003677,GO:0005634	189
BdiBd21-3.4G0195400	0.139374	0.157447	0.173803	0.309181	0.107807	0.152271	OG0000169
BdiBd21-3.1G0148300	0	0	0	0	0	0	OG0000521
BdiBd21-3.1G0987100	0	0	0	0	0	0	OG0010240	GO:0005515
BdiBd21-3.1G0462800	0.120286	0.269733	0.284781	0.233894	0.0928054	0.259841	OG0032451
BdiBd21-3.3G0187200	18.5542	26.7818	34.9476	37.1079	35.2824	56.392	OG0000357		69
BdiBd21-3.2G0350600	0.775024	0.695965	0.885481	1.06597	0.61892	1.02704	OG0017879		299
BdiBd21-3.5G0022600	1.11419	1.21625	1.28322	1.2707	1.09167	1.69456	OG0005049	GO:0003677	1493
BdiBd21-3.4G0507800	10.7864	15.2203	10.0319	20.9186	10.7279	32.5837	OG0002024	GO:0003677	291
BdiBd21-3.1G0599100	3.83947	4.182	3.60726	4.95255	3.41148	4.75454	OG0018756		1828
BdiBd21-3.3G0102200	0.184946	0.307104	0.14521	0.246412	0.15849	0.139376	OG0005456
BdiBd21-3.4G0239600	0.00633552	0.0276922	0.0330162	0.0173662	0.0350861	0.00804417	OG0000194	GO:0003676
BdiBd21-3.1G0490200	0.767218	0.601442	0.585762	0.413737	0.66206	0.383027	OG0002147		138
BdiBd21-3.4G0034900	0.647033	0.923675	0.49687	0.721685	0.542613	0.509316	OG0021229	GO:0005515	265
BdiBd21-3.2G0131800	3.55415	4.06169	3.22124	4.59781	4.4099	5.09313	OG0015977		2073
BdiBd21-3.1G0863100	2.26869	3.82537	2.64714	3.5022	3.05381	3.29859	OG0021643		3914
BdiBd21-3.1G0074100	0.176337	0.304338	0.126811	0.402797	1.42265	0.234796	OG0015083		106
BdiBd21-3.1G0605000	0.457774	0.562307	0.586658	0.728962	0.572098	0.674596	OG0004348		53
BdiBd21-3.4G0148700	5.41219	6.65746	12.5765	8.65773	13.3521	12.4045	OG0024845		4
BdiBd21-3.3G0372900	0.0162756	0	0	0	0	0	OG0013842
BdiBd21-3.2G0710600	0.0210935	0	0	0	0.0105956	0	OG0001064	GO:0003700
BdiBd21-3.1G0444700	0	0	0	0	0	0.0076537	OG0000096	GO:0003676
BdiBd21-3.2G0515300	6.23194	5.45657	12.5989	6.31987	16.6486	8.4933	OG0016238	GO:0003700	4
BdiBd21-3.3G0372000	0	0	0	0	0	0	OG0008281	GO:0003824
BdiBd21-3.3G0425000	8.27378	9.24406	9.43952	10.2249	11.9198	11.6152	OG0001732	GO:0003824	6224
BdiBd21-3.3G0249900	2.6539	2.76986	3.17212	4.3598	2.85555	5.21971	OG0022198	GO:0003824	3
BdiBd21-3.3G0765100	0.0196079	0	0	0	0.0237534	0.00829869	OG0000711
BdiBd21-3.2G0450100	4.46652	9.22831	6.97878	9.90584	6.01396	11.2492	OG0000359	GO:0003824	1897
BdiBd21-3.4G0267200	6.75651	4.66124	7.49018	5.01331	6.72015	4.40837	OG0003981		1
BdiBd21-3.1G0365200	0	0	0	0	0	0	OG0000151
BdiBd21-3.2G0216400	40.547	54.5715	38.9747	57.7616	37.8267	58.0335	OG0001997	GO:0000166,GO:0003676,GO:0003723,GO:0005634,GO:0000166,GO:0003676,GO:0003723,GO:0005634,GO:0000166,GO:0003676,GO:0003723,GO:0005634,GO:0000166,GO:0003676,GO:0003723,GO:0005634	0
BdiBd21-3.1G0235000	0.225211	0.346455	0.145226	0.210203	0.225789	0.484204	OG0015268	GO:0003677,GO:0003700,GO:0003677,GO:0003700	2892
BdiBd21-3.3G0169500	0.0634907	0.0074266	0.127186	0.0305931	0.0612062	0.0434746	OG0019799
BdiBd21-3.2G0435800	0	0	0	0	0	0	OG0013686
BdiBd21-3.4G0142250	0.163979	0.202251	0	0	0.0675411	0.250016	OG0030626
BdiBd21-3.4G0545600	9.06106	8.85592	8.28443	9.96998	10.764	8.37686	OG0000526	GO:0003824	122
BdiBd21-3.1G0031800	0.0185278	0.0108299	0	0	0.0109117	0.0147597	OG0018637	GO:0003676
BdiBd21-3.5G0265100	1.01581	1.25546	1.31957	1.50592	1.56365	1.57411	OG0025014		419
BdiBd21-3.1G0902000	14.263	15.2446	11.5126	17.2257	21.1395	17.5869	OG0004390		766
BdiBd21-3.3G0224900	0	0	0	0	0	0	OG0001172
BdiBd21-3.2G0529700	0	0	0	0	0	0	OG0034400
BdiBd21-3.2G0114000	1.14488	1.54496	0.906189	2.29091	1.23853	1.7083	OG0011301		5
BdiBd21-3.4G0223500	0	0	0	0	0	0	OG0024607
BdiBd21-3.3G0337500	0.181669	0.103538	0.191986	0.171825	0.020247	0.192418	OG0035575
BdiBd21-3.4G0153500	10.1927	11.5718	10.6706	12.9959	12.7934	15.4911	OG0013539		862
BdiBd21-3.3G0793400	0.0068792	0.0147638	0.0488916	0	0.0138222	0.0181311	OG0025551	GO:0005515
BdiBd21-3.1G0356000	11.8833	11.6912	13.3058	10.0973	17.8026	10.8241	OG0000677	GO:0005622	1
BdiBd21-3.2G0768350	3.46935	3.26681	4.86955	2.88038	3.92076	3.23167	OG0034661		51
BdiBd21-3.2G0113500	0	0	0	0	0	0	OG0025375	GO:0003676
BdiBd21-3.2G0756500	0	0.0112037	0	0	0	0	OG0019078	GO:0003824
BdiBd21-3.1G0049350	0.0155679	0	0.0322294	0	0.0156401	0	OG0032020
BdiBd21-3.1G0741401	0	0	0	0	0	0	OG0021664	GO:0005515
BdiBd21-3.5G0174700	0.00680727	0.00365537	0.0171438	0.00467002	0.00960426	0.00925052	OG0009324	GO:0003677
BdiBd21-3.2G0755000	7.93345	20.1292	3.17947	19.8268	2.30552	15.4554	OG0019299		0
BdiBd21-3.5G0141800	136.39	26.039	221.958	25.6666	306.579	32.202	OG0006634		1
BdiBd21-3.2G0023300	0	0	0	0	0	0	OG0002248	GO:0005576
BdiBd21-3.3G0482400	0	0	0	0	0	0	OG0004105
BdiBd21-3.3G0573800	0	0	0	0	0	0	OG0025389
BdiBd21-3.3G0133200	4.47735	4.9007	3.00939	4.39394	2.97234	5.71019	OG0007782		5761
BdiBd21-3.2G0381300	0	0	0	0.0415981	0	0	OG0004505
BdiBd21-3.2G0269400	0.00459708	0	0	0.00368937	0.00270739	0.0034217	OG0025437	GO:0000166
BdiBd21-3.3G0728201	0	0	0	0	0	0	OG0036509
BdiBd21-3.1G0295400	3.74212	4.26921	4.23066	4.52309	4.86142	4.38773	OG0010060		2983
BdiBd21-3.1G0661000	0.0859003	0.0140009	0.102245	0	0.0396223	0.0370088	OG0001417
BdiBd21-3.2G0465300	2.62845	2.84176	2.48829	3.20381	2.5129	3.86166	OG0015738		5013
BdiBd21-3.3G0558300	9.95206	1.50997	23.6305	0.679997	51.6256	1.79357	OG0001258		1
BdiBd21-3.1G0552300	0	0	0	0	0	0	OG0000046
BdiBd21-3.4G0593300	0	0	0	0	0	0	OG0000736	GO:0005515
BdiBd21-3.5G0028600	0.95247	2.04887	0.552422	0.664138	0.783636	0.426688	OG0009726		7936
BdiBd21-3.4G0252600	1.21656	1.46915	0.789274	2.55358	1.1136	2.25554	OG0002481		512
BdiBd21-3.3G0790132	0	0	0	0	0	0	OG0035478
BdiBd21-3.5G0335750	0.365567	0.38701	0.141196	0.244366	0.111556	0.414983	OG0031618		8414
BdiBd21-3.5G0074900	0	0	0	0	0	0	OG0014337
BdiBd21-3.3G0639800	0.0030534	0.00632378	0.0205611	0.00837896	0.00998865	0.0160739		GO:0005515
BdiBd21-3.2G0187200	1.88755	1.56707	1.53253	1.10986	0.802271	1.16851	OG0001794	GO:0003676,GO:0005515,GO:0003676,GO:0005515	4551
BdiBd21-3.3G0691600	0	0.0610285	0	0	0	0.14254	OG0036830
BdiBd21-3.2G0223200	0.0168562	0.00949828	0	0.00755276	0.028332	0.0144857	OG0003199
BdiBd21-3.4G0603250	0	0	0	0	0	0	OG0030560
BdiBd21-3.4G0210500	0.0142724	0.00525938	0.0455189	0.0144744	0.020183	0.0138651	OG0000667
BdiBd21-3.5G0144000	0	0	0	0	0	0	OG0001120	GO:0003677,GO:0003700,GO:0003677,GO:0003700
BdiBd21-3.3G0084801	0.0572005	0.0284729	0.102599	0.0679226	0.187017	0.0676947	OG0022188
BdiBd21-3.1G0136300	30.7125	43.4177	32.9926	53.849	49.5135	62.5194	OG0010255		477
BdiBd21-3.4G0565700	0	0	0	0	0	0	OG0000037
BdiBd21-3.2G0419200	10.9439	12.1721	11.1838	14.0096	13.3398	14.1841	OG0004484	GO:0003677,GO:0005634,GO:0003677,GO:0005634	4931
BdiBd21-3.4G0573900	0	0	0	0	0	0	OG0021250
BdiBd21-3.3G0631900	11.5824	4.58729	19.9116	4.89076	21.8805	4.11772	OG0016577		1
BdiBd21-3.1G0920500	48.4535	54.6367	52.3458	58.7748	62.6581	60.4955	OG0010456		12
BdiBd21-3.1G0901700	0	0	0	0	0	0	OG0032002
BdiBd21-3.3G0588400	0	0	0	0	0	0	OG0035621
BdiBd21-3.1G0374600	2.54892	3.38977	2.45554	3.80757	3.52068	3.57203	OG0010815		689
BdiBd21-3.3G0541900	0.757146	0.875359	0.338528	1.05757	0.660909	1.05177	OG0036317	GO:0005515	6409
BdiBd21-3.1G0707200	2.59309	3.15026	3.59957	2.73856	3.34049	3.01568	OG0010508		1876
BdiBd21-3.1G0431300	0.129727	0.453284	0.279214	0.266031	0.0608655	0.172174	OG0004321		1117
BdiBd21-3.1G0084300	0.0688401	0.046965	0.0289187	0.0449325	0.0377288	0.0207914	OG0006339
BdiBd21-3.5G0126600	2.42863	3.41157	1.95208	3.83329	2.87623	3.71197	OG0009728		149
BdiBd21-3.2G0350200	0	0	0	0	0	0	OG0010133
BdiBd21-3.1G0563000	0.170523	0.210261	0.0462927	0.181041	0.12758	0.349844	OG0001755
BdiBd21-3.5G0201000	13.2127	17.6379	9.88103	14.3307	7.7109	11.7172	OG0006697		8
BdiBd21-3.3G0618500	0.274544	0.663216	0.178967	0.264043	0.12027	0.0414298	OG0000652		879
BdiBd21-3.1G0576000	2.1611	2.91328	2.43058	3.61633	2.6536	3.54226	OG0015333	GO:0000166,GO:0003676,GO:0000166,GO:0003676	1824
BdiBd21-3.1G0825200	22.8611	7.45378	41.5253	7.66749	53.6258	11.2278	OG0007211	GO:0005515	1
BdiBd21-3.4G0025000	0.249344	0.357727	0.202191	0.381412	0.15274	0.276861	OG0001319		7
BdiBd21-3.2G0342800	5.25601	9.02681	5.78935	7.19588	7.19164	7.15671	OG0011943		4802
BdiBd21-3.3G0289800	2.96394	3.17551	3.13808	3.6222	2.80671	3.58506	OG0025388		6022
BdiBd21-3.4G0225833	0.150236	0.299601	0.445701	0	0.272998	0.204158	OG0030545
BdiBd21-3.3G0358800	2.81602	6.10108	3.23116	6.996	4.76508	7.49713	OG0036457		6119
BdiBd21-3.4G0617800	2.1752	2.34674	1.63656	2.86788	2.49075	2.5291	OG0000651		1059
BdiBd21-3.1G0314200	4.75222	5.93942	5.15193	6.68998	6.30398	7.22241	OG0006903	GO:0005634	3014
BdiBd21-3.3G0238500	0.663001	1.40487	0.691866	1.04231	1.03842	1.30412	OG0022300	GO:0005515	5934
BdiBd21-3.3G0535100	0	0.0158913	0	0	0	0	OG0016591
BdiBd21-3.2G0229600	0.0588002	0.0839544	0	0.0968266	0.0359652	0.0649084	OG0015694
BdiBd21-3.2G0512600	0.00840523	0.0180463	0	0.0128167	0.0221922	0.0171626	OG0002953
BdiBd21-3.3G0153250	0	0	0	0	0	0	OG0036684
BdiBd21-3.5G0366050	5.13637	5.15515	3.9305	7.85585	4.92943	9.68682	OG0031569		349
BdiBd21-3.1G0831000	0	0	0	0	0	0	OG0000107
BdiBd21-3.2G0725800	0	0	0	0	0	0	OG0007771
BdiBd21-3.4G0261400	0	0	0	0	0	0	OG0004861
BdiBd21-3.5G0244900	16.7363	10.8747	16.782	15.3687	19.8327	12.7506	OG0009576		8263
BdiBd21-3.1G0993600	0.57706	0.642434	0.297618	0.245488	0.53995	0.280976	OG0010295		1283
BdiBd21-3.5G0113000	0	0	0	0	0	0	OG0000002
BdiBd21-3.2G0190300	3.43274	7.01926	3.74607	6.74631	4.67714	6.45661	OG0002902		1130
BdiBd21-3.4G0048000	0.619675	0.713845	0.553556	0.618528	0.63538	0.849368	OG0024853		6928
BdiBd21-3.2G0397100	1.57839	2.02255	1.09543	2.11071	2.03942	1.43926	OG0035193		4888
BdiBd21-3.2G0086750	2.44365	4.01507	2.81769	5.52491	3.62935	4.62927	OG0025484		715
BdiBd21-3.F0001000	0.210843	0.222894	0.247664	0.31053	0.326617	0.207371	OG0004817		8473
BdiBd21-3.3G0076000	1.29523	1.43664	1.32315	1.35921	2.5512	1.06753	OG0000296		72
BdiBd21-3.1G0413100	0	0	0	0	0	0	OG0000264
BdiBd21-3.2G0423900	0.385813	0.40133	0.251434	0.240577	0.225667	0.222516	OG0000706
BdiBd21-3.4G0122200	10.0025	10.2955	10.1904	12.7188	11.0227	14.5316	OG0013538	GO:0003824	3
BdiBd21-3.1G0477500	0	0	0	0	0	0	OG0006966
BdiBd21-3.5G0313400	37.2367	33.0631	34.9166	25.8361	33.5597	18.9642	OG0009505	GO:0005515	111
BdiBd21-3.4G0053100	0	0.079276	0	0	0.223205	0	OG0029760
BdiBd21-3.5G0215400	0.0598433	0	0.12389	0.0819267	0.289105	0.0813221	OG0030969
BdiBd21-3.2G0442201	0.269243	0.475547	0.156671	0.320933	0.130865	0.234629	OG0015528	GO:0005515	722
BdiBd21-3.4G0373500	0	0.00814426	0	0	0	0	OG0003202	GO:0003676
BdiBd21-3.1G0111800	2.94431	6.54738	2.73125	4.62281	2.13638	3.22986	OG0018787		236
BdiBd21-3.5G0002566	5.5249	6.63304	7.75602	5.63006	12.0421	7.39336	OG0031647		156
BdiBd21-3.3G0446300	0.960477	1.55856	1.18837	0.769327	1.42368	1.24398	OG0022213		6263
BdiBd21-3.1G0755200	0.024248	0	0.0544273	0	0	0	OG0025078
BdiBd21-3.1G0762900	0.857494	0.86312	0.916938	1.00026	0.700691	0.835594	OG0014834		427
BdiBd21-3.1G0069100	1.75902	2.19428	2.31778	2.62803	1.93204	3.20741	OG0032901	GO:0003682,GO:0005515,GO:0003682,GO:0005515	354
BdiBd21-3.5G0323000	3.59346	3.82563	3.0504	4.26485	3.84436	4.88493	OG0005137		8389
BdiBd21-3.4G0570800	45.3707	53.7896	55.1055	44.9389	49.9454	50.2087	OG0004920	GO:0005198	7790
BdiBd21-3.1G0941400	0	0.0531629	0	0.0677689	0	0	OG0033127
BdiBd21-3.4G0572900	0	0.0140773	0	0	0	0.0178125	OG0030469
BdiBd21-3.5G0156100	1.63053	2.50333	2.10324	2.85908	1.91788	2.77966	OG0014240		1178
BdiBd21-3.2G0565350	0	0	0	0	0	0	OG0034930
BdiBd21-3.2G0264500	2.68372	3.38945	1.8593	3.92805	1.85683	2.84714	OG0016111		443
BdiBd21-3.2G0037666	0.27652	0.572177	0.455599	0.320941	0.274141	0.265752	OG0034900	GO:0005515	4300
BdiBd21-3.2G0542850	0.411065	0.322563	0.43194	0.473973	0.177831	0.100919	OG0034266		5125
BdiBd21-3.2G0471400	0.459542	0.609273	0.400342	0.62078	0.420149	0.645668	OG0001650	GO:0005515	5029
BdiBd21-3.2G0199700	0	0	0	0	0	0	OG0034136
BdiBd21-3.2G0340600	6.88351	9.29692	6.13962	10.4587	7.75763	10.7888	OG0004530	GO:0003677,GO:0005634,GO:0003677,GO:0005634	753
BdiBd21-3.5G0078250	0	0	0	0	0	0.0104044	OG0021528
BdiBd21-3.2G0065500	0.23371	0.33801	0.0698451	0.288773	0.261686	0.216295	OG0000331		4344
BdiBd21-3.5G0085200	0.653326	0.689127	0.564568	0.645348	0.728148	0.680877	OG0021553		277
BdiBd21-3.1G0528566	0	0	0	0.0277961	0.0300529	0.0224747	OG0010994
BdiBd21-3.2G0482433	0	0.0416885	0.0576268	0	0	0	OG0034158
BdiBd21-3.3G0782700	0.368709	0.412957	0.178956	0.10929	0.558258	0.154026	OG0000445		974
BdiBd21-3.3G0273200	0.144645	0.140574	0.205479	0.345258	0.147545	0.370417	OG0036601		5994
BdiBd21-3.2G0193950	0.295249	0.414947	0.989421	0.505589	0.188254	0.501357	OG0034241		1351
BdiBd21-3.2G0269700	18.3155	23.1523	29.2978	20.5645	38.0377	22.7935	OG0015531	GO:0005515,GO:0005783,GO:0005515,GO:0005783	738
BdiBd21-3.2G0305640	0.481653	0.363128	0.460788	0.51732	0.457002	0.518983	OG0034290		4741
BdiBd21-3.2G0341750	0	0	0	0	0	0.0115625	OG0033853
BdiBd21-3.1G0471001	0	0.0148554	0	0	0	0	OG0031946
BdiBd21-3.4G0326200	0	0	0	0	0	0	OG0000389
BdiBd21-3.3G0521550	0.523206	2.6136	1.02409	1.01292	0.494048	0.972165	OG0035725		2063
BdiBd21-3.2G0709600	1.20947	1.29313	1.25802	1.61394	1.61085	1.69326	OG0003224	GO:0005634	1222
BdiBd21-3.1G0071600	0.0115245	0	0.0491932	0.00926955	0.146034	0.0538787	OG0032589	GO:0003824
BdiBd21-3.1G0391400	11.0045	11.2626	10.2236	14.259	12.4954	15.3163	OG0008824	GO:0003677,GO:0005515,GO:0005634,GO:0003677,GO:0005515,GO:0005634,GO:0003677,GO:0005515,GO:0005634	3
BdiBd21-3.4G0170501	0	0	0	0	0	0	OG0013684	GO:0005515
BdiBd21-3.2G0806400	1.41604	1.49904	1.17759	1.71332	1.02363	1.7744	OG0005611	GO:0005515	314
BdiBd21-3.2G0442400	0	0	0	0	0	0	OG0034490
BdiBd21-3.3G0421400	2.72104	2.73695	2.55441	2.63198	2.17089	3.29409	OG0012750	GO:0005515	1484
BdiBd21-3.1G0864500	2.68246	5.4764	2.85864	4.81096	4.34704	4.18437	OG0010721		1257
BdiBd21-3.2G0619300	0.908233	0.280013	0.43132	0.750031	1.21376	0.912898	OG0001458		2208
BdiBd21-3.4G0084700	1.74422	2.76511	1.4507	2.7259	1.9059	3.21635	OG0003933		0
BdiBd21-3.1G0889000	6.4489	5.40264	21.6413	3.14289	16.8897	3.88141	OG0033528		1775
BdiBd21-3.1G0519500	1.15927	1.76169	1.61625	1.56788	1.46143	2.05626	OG0010763	GO:0003676,GO:0003723,GO:0005198,GO:0005515,GO:0005622,GO:0005634,GO:0003676,GO:0003723,GO:0005198,GO:0005515,GO:0005622,GO:0005634,GO:0003676,GO:0003723,GO:0005198,GO:0005515,GO:0005622,GO:0005634,GO:0003676,GO:0003723,GO:0005198,GO:0005515,GO:0005622,GO:0005634,GO:0003676,GO:0003723,GO:0005198,GO:0005515,GO:0005622,GO:0005634,GO:0003676,GO:0003723,GO:0005198,GO:0005515,GO:0005622,GO:0005634	3349
BdiBd21-3.3G0374300	16.9135	17.1995	19.1905	19.5812	25.3982	19.8368	OG0013001	GO:0003677,GO:0004518,GO:0003677,GO:0004518	83
BdiBd21-3.1G0414600	12.3329	11.0507	15.7084	11.0051	15.0543	10.7112	OG0006800		1
BdiBd21-3.1G0710500	0	0	0	0	0	0	OG0025140
BdiBd21-3.1G0856600	25.7869	36.6445	25.7098	11.6352	20.4282	10.286	OG0010629		2
BdiBd21-3.5G0083700	0	0	0	0	0	0	OG0021389
BdiBd21-3.4G0130632	0.102766	0.0801211	0.134816	0.0433909	0.0855375	0.0689797	OG0024614
BdiBd21-3.4G0281500	0.446847	0.554198	0.636158	0.846644	1.00481	0.739716	OG0009282		1483
BdiBd21-3.4G0318600	0.259063	0.161009	0.133396	0.147395	0.292206	0.199615	OG0030011		256
BdiBd21-3.1G0422250	0	0	0	0.0196908	0	0	OG0001563
BdiBd21-3.1G0689550	0.200783	0.23071	0.415669	0	0	0.274259	OG0032966
BdiBd21-3.2G0444500	0	0	0	0	0	0	OG0000189
BdiBd21-3.3G0674900	0	0	0	0	0	0	OG0000082
BdiBd21-3.2G0762900	0.37633	0.665938	0.374986	0.83034	0.491747	0.753865	OG0005487		108
BdiBd21-3.4G0292200	0.377774	0.831895	0.20038	0.787543	0.164471	0.699621	OG0008789	GO:0005215	2490
BdiBd21-3.1G0866700	0	0	0	0	0	0	OG0014527
BdiBd21-3.2G0244300	0.139366	0.222854	0.109763	0.0288992	0.0594334	0.0802288	OG0034567
BdiBd21-3.4G0430150	1.56359	2.36606	1.85979	1.79497	2.08295	1.37794	OG0029770		7546
BdiBd21-3.1G0914300	0	0	0	0	0	0	OG0018863	GO:0003677
BdiBd21-3.3G0719800	0	0	0	0	0	0	OG0000432
BdiBd21-3.2G0301100	75.1769	73.1942	18.0252	134.864	17.5371	118.81	OG0004423		0
BdiBd21-3.2G0418500	2.59934	3.2496	2.6526	3.80543	3.09822	4.00986	OG0003726		3
BdiBd21-3.3G0478900	5.52877	6.21507	5.74527	6.52427	6.29712	7.2732	OG0002356		6311
BdiBd21-3.2G0197000	1.50716	1.51606	1.17577	1.16752	1.12708	1.34826	OG0004430		4571
BdiBd21-3.1G0404200	6.86294	7.95168	6.73744	8.9192	6.97564	9.44811	OG0003487	GO:0005515	484
BdiBd21-3.1G0942600	0.0458561	0.0655595	0.0387797	0.114565	0.0965907	0.0776085	OG0003363	GO:0005794
BdiBd21-3.2G0555900	0.0308052	0.012098	0.0323696	0.00679728	0.0389143	0	OG0019331	GO:0005515
BdiBd21-3.2G0379000	0.810044	0.840757	0.438377	1.06566	0.645875	1.08173	OG0034892		79
BdiBd21-3.5G0088900	0	0.0149435	0.0288061	0	0.0559153	0	OG0004850
BdiBd21-3.3G0297300	1.9993	1.2636	1.87436	1.51989	1.72531	1.3481	OG0036498		30
BdiBd21-3.1G0871500	0.00568504	0.0239851	0.0235388	0.00780026	0	0.0149837	OG0010026
BdiBd21-3.3G0650432	0.0474412	0.021259	0.0615803	0.024392	0.0694589	0.0488529	OG0004350	GO:0005515,GO:0005634,GO:0005515,GO:0005634
BdiBd21-3.2G0003975	1.40318	1.69701	1.5633	1.71648	1.3426	2.1064	OG0000146	GO:0005515	4244
BdiBd21-3.1G0859600	5.98341	5.50897	5.11354	5.95336	7.24294	5.09454	OG0010804	GO:0003677	1933
BdiBd21-3.1G0504200	1.16798	1.94545	1.0709	1.17787	0.778047	1.24949	OG0021581	GO:0005215	168
BdiBd21-3.1G0058300	0	0	0	0	0	0	OG0003452
BdiBd21-3.4G0233800	0	0	0	0	0	0	OG0030362
BdiBd21-3.2G0373301	0	0	0.0377881	0	0.0183376	0	OG0034137
BdiBd21-3.3G0365600	0	0	0	0	0	0	OG0012311
BdiBd21-3.4G0543500	24.6012	16.7494	25.6822	18.01	28.8622	17.8624	OG0006153	GO:0005515	1
BdiBd21-3.3G0068900	0.955658	1.02697	1.11296	1.72458	0.790265	0.850884	OG0035904		5642
BdiBd21-3.5G0032232	0.451858	0.166823	0.16763	0.278391	0.078059	0.359973	OG0031512		2518
BdiBd21-3.2G0671600	0.881575	1.10455	0.767766	0.628734	0.679993	1.08836	OG0025349	GO:0005515	5317
BdiBd21-3.2G0618300	4.74044	4.15689	3.58961	4.14483	7.42551	3.86912	OG0011862		72
BdiBd21-3.3G0078300	3.05305	3.52252	2.75395	4.0092	3.55281	4.10132	OG0009676		5659
BdiBd21-3.3G0585300	0.00438444	0	0.0287596	0.00736881	0.0198763	0	OG0014043
BdiBd21-3.2G0154000	2.04642	2.35785	2.03988	2.71382	1.92089	3.27298	OG0003692		3
BdiBd21-3.1G0017300	0.623654	0.426665	0.606359	0.620375	0.605599	0.67819	OG0004378	GO:0003677	2563
BdiBd21-3.4G0037300	0	0.0497256	0	0	0	0.0587883	OG0029620
BdiBd21-3.4G0280100	0	0	0	0	0	0	OG0000046
BdiBd21-3.1G0159700	3.21362	4.01209	2.91256	4.34582	4.09309	4.11481	OG0001716		2788
BdiBd21-3.2G0522400	4.27469	5.27369	4.19319	5.26169	4.61604	6.2897	OG0007619		3
BdiBd21-3.1G0628600	0.0410492	0.0256969	0	0.00851204	0.0175057	0.032702	OG0006299
BdiBd21-3.1G0373300	0	0	0	0	0	0	OG0000151
BdiBd21-3.3G0375800	0.0148013	0.0458951	0.0374391	0.0437486	0.081253	0.0796237	OG0019675	GO:0003677
BdiBd21-3.1G1036600	0.129855	0.311444	0.245768	0.945053	1.03969	0.647567	OG0005388		10
BdiBd21-3.1G0066700	3.11255	4.07436	3.17883	3.16968	2.89505	3.31834	OG0005319		2658
BdiBd21-3.4G0543200	2.40561	3.01717	2.53749	3.17277	2.80653	3.59234	OG0008937		7747
BdiBd21-3.4G0365000	0	0	0	0	0	0	OG0024622
BdiBd21-3.4G0321350	0	0	0	0	0	0	OG0030603
BdiBd21-3.5G0053250	0.128899	0.168054	0.0507073	0.451611	0.0739013	0.453056	OG0031135		552
BdiBd21-3.3G0527000	0	0	0	0	0	0	OG0001323
BdiBd21-3.5G0189200	0.294383	0.43846	0.459281	0.446972	0.316715	0.656584	OG0006580	GO:0003824	70
BdiBd21-3.5G0095300	0	0	0	0	0	0	OG0031300
BdiBd21-3.2G0109400	193.71	145.548	134.198	136.859	81.3057	95.2706	OG0005721	GO:0005215	237
BdiBd21-3.3G0683900	0.013887	0.0262145	0.100283	0.011145	0.0414244	0.0110628	OG0000990	GO:0003677,GO:0003700,GO:0003677,GO:0003700
BdiBd21-3.4G0301200	0	0	0	0	0	0	OG0018141
BdiBd21-3.4G0104101	1.22246	0.256302	1.69468	0.25438	1.19401	0.211649	OG0021217		1
BdiBd21-3.2G0310800	5.8528	4.35859	7.02811	9.12806	16.9435	9.64641	OG0002263		4753
BdiBd21-3.1G0490700	1.95382	1.81216	1.30051	2.79563	1.57377	4.7247	OG0032959		311
BdiBd21-3.2G0491800	0	0	0	0	0	0	OG0000216
BdiBd21-3.4G0264700	2.50854	3.07071	2.25499	3.26438	2.77977	2.77144	OG0018080	GO:0005515	7253
BdiBd21-3.1G0193500	0.476724	0.639251	0.311358	0.41305	0.455438	0.272856	OG0025145		1635
BdiBd21-3.5G0062500	0	0	0	0	0	0	OG0000006
BdiBd21-3.3G0600432	0.301174	0.931767	0.973846	0.887507	0.384137	0.401725	OG0036297		2076
BdiBd21-3.1G0812501	0	0	0	0	0	0	OG0021526
BdiBd21-3.1G0229900	8.68309	11.453	10.9297	14.0812	10.9573	16.1096	OG0015452		70
BdiBd21-3.1G0509433	0.0470448	0.0316894	0	0.130541	0.0277064	0.147642	OG0032754
BdiBd21-3.4G0250300	0.204405	0.352169	0.228498	0.29784	0.206617	0.249278	OG0030676		7236
BdiBd21-3.3G0529800	8.01669	10.0772	8.84106	11.0958	11.8884	11.01	OG0008120	GO:0003824	2405
BdiBd21-3.4G0531900	1.40573	2.83816	1.32832	1.06492	1.29287	1.55348	OG0009098	GO:0005737	64
BdiBd21-3.2G0689900	0	0	0	0	0	0	OG0022046
BdiBd21-3.1G0723700	1.88894	2.75316	2.67616	2.16104	2.00761	2.52161	OG0011058		3691
BdiBd21-3.3G0239501	0	0	0	0	0	0	OG0035951
BdiBd21-3.4G0298800	0	0	0	0	0	0	OG0000020
BdiBd21-3.4G0061300	8.33276	9.81307	7.59845	10.677	9.34766	10.2747	OG0008762		1505
BdiBd21-3.1G0855100	0.757249	0.964096	0.608511	0.915637	0.994222	0.968107	OG0007101	GO:0005515	3902
BdiBd21-3.4G0583200	0.46837	0.310329	0.701414	0.565134	0.899631	0.511002	OG0006220	GO:0005515	2308
BdiBd21-3.2G0551400	5.92379	7.75291	9.23502	13.0847	5.7674	9.63825	OG0024952		5137
BdiBd21-3.4G0358400	1.47133	1.01062	2.05727	0.961237	1.70606	1.25512	OG0030675		569
BdiBd21-3.5G0099400	16.7088	10.2252	10.9269	12.207	5.54512	11.8371	OG0005048	GO:0000166,GO:0003676,GO:0000166,GO:0003676	2498
BdiBd21-3.4G0092100	3.13545	9.06898	2.36625	5.17988	0.630176	2.72175	OG0003163		195
BdiBd21-3.2G0047500	1.92217	1.59302	0	0.170317	1.90648	0.267092	OG0012023		6
BdiBd21-3.4G0045300	11.6296	13.1733	7.9833	16.7351	10.3215	15.5407	OG0006254	GO:0005215	0
BdiBd21-3.1G0261600	0	0	0	0	0	0	OG0015104
BdiBd21-3.5G0255600	0	0	0	0	0	0	OG0024931
BdiBd21-3.5G0187000	13.9016	21.199	12.5193	20.4561	14.5857	18.3365	OG0003305		7
BdiBd21-3.2G0270700	0	0	0	0.037485	0	0	OG0007733	GO:0003677
BdiBd21-3.1G0373500	262.351	188.737	204.19	131.586	121.51	92.174	OG0015127		2
BdiBd21-3.2G0071400	9.76429	13.9906	14.8649	10.2137	23.9441	15.293	OG0021939		410
BdiBd21-3.5G0320900	0.0996978	0.0165289	0.0372088	0.0732489	0.060245	0.17601	OG0009209
BdiBd21-3.3G0520800	0.148763	0.1207	0.112486	0.0493742	0.0506204	0.0456788	OG0008002
BdiBd21-3.2G0057200	0.00702543	0.00754503	0.0574536	0.0192573	0.0446149	0.0185165	OG0006562	GO:0005515
BdiBd21-3.3G0358050	0	0.0158795	0	0	0	0	OG0000006
BdiBd21-3.3G0091700	14.0201	15.1203	20.4402	13.9574	19.8945	15.5744	OG0017084		51
BdiBd21-3.2G0153500	1.09659	1.29591	1.20042	1.04862	1.04546	1.56418	OG0016112	GO:0005515	4490
BdiBd21-3.2G0443750	0.830922	0.738537	0.337579	0.177647	0.347255	0.388618	OG0000658		4970
BdiBd21-3.3G0396700	0	0	0	0	0	0	OG0036639
BdiBd21-3.2G0282900	49.6249	71.1955	66.2382	66.1138	91.6923	66.6815	OG0000444		33
BdiBd21-3.1G0681000	0	0	0	0	0	0	OG0001142
BdiBd21-3.3G0424201	0.386202	0.504283	0.436346	0.458433	0.311848	0.454687	OG0012450	GO:0005515	6223
BdiBd21-3.4G0316300	0	0	0	0	0	0	OG0000423	GO:0003677
BdiBd21-3.2G0597000	6.94542	12.7946	8.50986	13.7207	13.3247	15.1588	OG0007687	GO:0005783	5200
BdiBd21-3.1G0226950	0	0	0.0795753	0	0.0401789	0	OG0031875
BdiBd21-3.2G0103900	0	0	0	0	0	0	OG0000046
BdiBd21-3.1G0591750	0	0	0	0	0	0	OG0032455
BdiBd21-3.4G0178000	0.342332	0.531454	0.246732	0.560362	0.260748	0.400675	OG0006169		7127
BdiBd21-3.1G0448700	0	0.0552812	0	0	0	0	OG0031722
BdiBd21-3.2G0765000	0.108556	0.0430863	0.355136	0.137309	0.131242	0.0820597	OG0000208		5459
BdiBd21-3.4G0379100	32.098	33.3134	32.5078	43.9183	37.8595	41.7016	OG0013898	GO:0003676,GO:0003723,GO:0003676,GO:0003723	87
BdiBd21-3.3G0578400	0	0	0	0	0	0	OG0000352
BdiBd21-3.1G1043800	21.5306	238.423	1.2041	60.0399	4.66847	53.0353	OG0000082		107
BdiBd21-3.4G0386100	5.98679	5.69434	7.1104	9.67288	6.21815	8.66748	OG0030083		20
BdiBd21-3.3G0740300	0	0	0	0	0	0	OG0007966
BdiBd21-3.3G0237401	0.0190628	0.0190075	0.0394646	0.078292	0	0.0761474	OG0035594	GO:0005515
BdiBd21-3.2G0756966	0	0	0	0	0	0	OG0034261
BdiBd21-3.4G0121400	1.74829	1.61363	0.853518	1.21338	0.840716	0.778853	OG0030404		7053
BdiBd21-3.5G0286300	0	0.106951	0	0	0.0189493	0.0515288	OG0014327	GO:0003677
BdiBd21-3.4G0179300	0	0	0	0	0	0	OG0013587
BdiBd21-3.5G0286900	10.4416	11.3764	10.9635	12.9875	12.5896	13.5729	OG0009311		39
BdiBd21-3.3G0107400	2.8377	2.9015	2.9236	3.6107	3.14549	4.05433	OG0012255		5706
BdiBd21-3.2G0455300	2.3154	2.95041	1.60878	2.3276	2.8986	2.54051	OG0005551		4986
BdiBd21-3.4G0368200	0	0.0406915	0.0325939	0.0217513	0.041777	0.00883906	OG0001652
BdiBd21-3.1G0380800	0	0	0.0455577	0	0	0	OG0015330
BdiBd21-3.3G0624800	0.029784	0.00598304	0.199443	0	0.0118024	0	OG0013526
BdiBd21-3.3G0330300	1.56653	1.90407	1.99353	2.20036	2.7966	2.33461	OG0005799	GO:0003676	1216
BdiBd21-3.1G0299800	4.99937	5.08626	6.77069	5.42036	7.92456	5.73315	OG0010391	GO:0005488	1
BdiBd21-3.1G0144200	0.119593	0.390465	0.243057	0.357588	0.0475091	0.530832	OG0000535		2768
BdiBd21-3.5G0310100	0	0	0	0	0.018322	0	OG0024940	GO:0005515
BdiBd21-3.1G0079200	1.25259	1.3412	1.17975	1.83479	1.24546	2.05285	OG0000293		657
BdiBd21-3.1G0676000	0.186271	0.30658	0.127104	0.269252	0.202016	0.13686	OG0000599
BdiBd21-3.3G0687200	0	0	0	0	0	0.0161313	OG0001807
BdiBd21-3.5G0315800	272.101	467.467	188.012	566.147	281.174	586.565	OG0005155		0
BdiBd21-3.1G0607800	0.340956	0.480222	0.354858	0.337097	0.256963	0.139041	OG0000700		3485
BdiBd21-3.5G0230900	1.8819	1.81313	2.00717	2.48609	1.94865	2.36403	OG0024865		8241
BdiBd21-3.4G0619900	0.0624137	0.0813901	0	0.0830524	0.0495328	0.038016	OG0018048	GO:0005515
BdiBd21-3.4G0267800	0	0	0	0	0	0	OG0000425
BdiBd21-3.3G0657900	7.66031	8.3748	9.33919	6.96978	10.7076	6.5292	OG0002340		1
BdiBd21-3.1G0635050	0.723983	0.661603	1.14186	1.22051	0.442497	0.627512	OG0032445		803
BdiBd21-3.2G0361300	12.5123	7.34898	22.7137	4.3575	26.538	7.58023	OG0005654		1
BdiBd21-3.1G0582900	0	0	0	0	0	0	OG0007371	GO:0005215
BdiBd21-3.3G0365200	1.11353	2.78194	0.805677	2.8996	1.22878	2.41391	OG0035862		2373
BdiBd21-3.1G0997400	0	0	0	0	0	0	OG0010189
BdiBd21-3.1G0028000	2.18782	3.10341	2.18115	3.28393	2.49188	3.56142	OG0007165		1534
BdiBd21-3.4G0288600	1.54531	1.66273	0.978541	1.64151	1.46465	1.49835	OG0000135	GO:0005515	7301
BdiBd21-3.1G0988100	11.4242	14.2381	10.1678	16.1647	13.6121	14.9524	OG0000433		4127
BdiBd21-3.1G0270800	2.37582	3.71928	2.13282	3.47646	2.19898	4.00118	OG0006752		150
BdiBd21-3.4G0454800	0.126067	0.12335	0.390961	0.111248	0.650339	0.066265	OG0004835		56
BdiBd21-3.2G0162000	15.2864	17.2776	11.5303	9.06345	7.7224	7.20312	OG0011162	GO:0003723	2
BdiBd21-3.4G0359700	0	0	0	0	0.0211937	0	OG0017902
BdiBd21-3.2G0184200	5.9317	6.98535	5.94433	7.44207	6.72329	7.82761	OG0016144		217
BdiBd21-3.2G0123600	9.06342	9.35411	9.56468	9.99024	8.73358	8.9837	OG0001804		2
BdiBd21-3.3G0325400	0	0	0	0	0	0	OG0022174
BdiBd21-3.4G0503201	0.00587401	0	0	0	0.0159738	0.00437214	OG0029825
BdiBd21-3.2G0014850	0	0	0	0	0	0	OG0034393
BdiBd21-3.2G0468500	0	0	0	0	0	0	OG0007677
BdiBd21-3.3G0477100	6.95941	13.9874	21.1044	17.9194	15.7091	25.9681	OG0004112		91
BdiBd21-3.1G0566600	1.79526	3.17328	2.07094	2.35372	3.05651	2.26576	OG0000581		3427
BdiBd21-3.5G0344801	0	0	0	0	0	0.0125948	OG0009209	GO:0000166,GO:0005737,GO:0000166,GO:0005737
BdiBd21-3.1G0917600	0.050817	0.127458	0.0424936	0.0693333	0.0647847	0.0729424	OG0014754	GO:0005515
BdiBd21-3.2G0175700	0	0	0	0.161339	0	0	OG0034353
BdiBd21-3.3G0634000	0.65477	0.648989	0.499018	0.527806	0.912208	0.453327	OG0016784		1271
BdiBd21-3.1G0276800	0	0	0	0	0	0	OG0002693
BdiBd21-3.3G0609800	14.2296	19.4493	15.2489	22.1559	21.7801	21.991	OG0006948	GO:0003677,GO:0005634,GO:0003677,GO:0005634	816
BdiBd21-3.4G0000700	0	0	0	0	0	0	OG0000159
BdiBd21-3.1G0500500	10.6947	9.17479	13.3349	11.4658	17.5823	13.7286	OG0021715		62
BdiBd21-3.2G0244550	0	0	0	0	0	0	OG0000693
BdiBd21-3.4G0387100	0.559962	0.776646	0.579754	1.086	0.508403	0.697268	OG0000839		7473
BdiBd21-3.1G0444100	0.128842	0.23264	0.318903	0.195644	0.324187	0.234968	OG0010571	GO:0003824	3218
BdiBd21-3.3G0202800	15.4032	19.999	12.9109	16.8132	12.0448	18.2996	OG0005107	GO:0000166,GO:0003676,GO:0000166,GO:0003676	8
BdiBd21-3.5G0327600	0.942183	1.47917	0.871245	1.62228	1.44171	1.62396	OG0014186		1639
BdiBd21-3.1G0219500	2.11966	3.12593	3.04394	3.7291	3.47271	4.07372	OG0015477		1649
BdiBd21-3.3G0805400	0.139623	0.0972138	0.0422868	0.0716282	0.0389452	0.0974341	OG0035662
BdiBd21-3.2G0765501	0	0	0	0	0	0	OG0021936
BdiBd21-3.2G0227800	1.70568	1.51585	1.60194	1.7782	1.40695	2.45509	OG0005732	GO:0005634	4606
BdiBd21-3.4G0040300	3.33183	3.76393	3.39536	4.2732	3.34185	4.44722	OG0008848	GO:0003723	6915
BdiBd21-3.4G0174801	0	0	0	0.1161	0.138799	0.269779	OG0024760
BdiBd21-3.2G0705100	2.28517	3.78244	2.02889	4.34439	4.50092	4.46298			765
BdiBd21-3.3G0092032	7.25107	9.91872	7.29678	12.5255	7.38546	11.077	OG0022309	GO:0003676,GO:0003723,GO:0003676,GO:0003723	261
BdiBd21-3.2G0437400	0	0	0	0	0	0	OG0034617
BdiBd21-3.2G0571300	0	0.0306159	0.132163	0.0119878	0.0161676	0.00974292	OG0016174
BdiBd21-3.4G0097300	0	0	0	0	0	0	OG0021389
BdiBd21-3.3G0232201	9.49712	11.0957	7.11911	10.8003	11.5283	10.5906	OG0036503		5925
BdiBd21-3.2G0509900	5.185	6.81711	4.20938	9.46146	4.37793	9.76714	OG0019270		0
BdiBd21-3.1G1051600	0	0	0	0	0	0	OG0024831
BdiBd21-3.3G0382600	2.19937	2.82798	2.1455	2.67555	2.33257	2.70302	OG0012445		6151
BdiBd21-3.3G0396900	12.7263	14.9673	11.6474	15.6867	11.2204	17.2792	OG0001681	GO:0003676	0
BdiBd21-3.4G0037700	0.0932517	0	0	0	0	0	OG0006341
BdiBd21-3.3G0723900	8.70072	11.9947	9.30116	19.3669	19.059	18.3967	OG0008015		26
BdiBd21-3.3G0754500	0.47862	0.757179	0.327598	0.745498	0.401185	0.646401	OG0003503		92
BdiBd21-3.3G0546600	4.55423	7.86954	2.42595	4.78204	2.35854	4.12115	OG0012938		6416
BdiBd21-3.2G0348400	0.174633	0.172576	0.0684127	0.19351	0.155602	0.082051	OG0019182
BdiBd21-3.1G0052050	0.284485	0.478046	0.458483	0.25924	0.219615	0.463887	OG0032817		2632
BdiBd21-3.2G0234700	0.0348364	0.130024	0	0	0	0	OG0015796
BdiBd21-3.3G0402000	18.9363	23.0566	15.9112	12.6624	12.5543	11.5165	OG0019705	GO:0003723	2
BdiBd21-3.2G0160500	5.55785	4.89873	6.12958	5.39125	7.06308	5.97813	OG0019142		1
BdiBd21-3.2G0572900	0.506055	0.847295	0.527634	0.807192	0.535853	0.816661	OG0000252		5168
BdiBd21-3.4G0488800	7.79473	8.58691	8.92953	7.48021	9.75063	7.47111	OG0008840		1
BdiBd21-3.3G0183000	4.19843	5.22716	4.00456	5.52077	5.23494	5.65397	OG0016827		2168
BdiBd21-3.3G0122600	0	0	0	0	0	0	OG0002619
BdiBd21-3.2G0362000	2.18206	2.79732	2.40399	2.99991	2.40775	3.41486	OG0004420	GO:0005515	477
BdiBd21-3.2G0110700	1.78773	3.54267	1.20894	3.99791	1.00686	2.58745	OG0004273		0
BdiBd21-3.3G0208400	4.24891	4.44625	4.52559	5.38743	5.33139	5.23983	OG0013561		1225
BdiBd21-3.3G0615800	0	0	0	0	0	0	OG0016691
BdiBd21-3.1G0698250	0.216707	0.147408	0.165803	0.253241	0.349722	0.187168	OG0031833
BdiBd21-3.2G0686500	117.172	22.6365	230.211	23.1116	395.558	21.4302	OG0011889	GO:0003677,GO:0005634,GO:0003677,GO:0005634	1
BdiBd21-3.1G0176400	0.0574432	0	0	0	0	0	OG0000284
BdiBd21-3.1G0248200	36.7828	2.48779	89.3812	3.13573	143.632	4.00416	OG0006826		1
BdiBd21-3.1G0666800	0	0	0	0	0.0827092	0	OG0032519
BdiBd21-3.1G0600100	3.41476	4.55459	3.0892	5.48549	3.09285	5.30272	OG0010704		0
BdiBd21-3.2G0125400	0.936095	1.28956	0.861191	1.53693	1.13931	1.749	OG0000098		686
BdiBd21-3.2G0376900	0.248144	0.27355	0.0976166	0.595776	0.735478	0.335495	OG0025343		1160
BdiBd21-3.5G0117900	0.098078	0.0692598	0.080455	0.134484	0.0966233	0.167087	OG0014298	GO:0003700
BdiBd21-3.2G0096900	11.1043	11.8721	11.3031	16.7341	13.7628	17.7718	OG0012091		87
BdiBd21-3.1G0313800	0.432556	0.426962	0.119078	0.149548	0.470613	0.153911	OG0014824		3013
BdiBd21-3.3G0230100	0	0.0370168	0	0	0.180009	0.0226937	OG0016586
BdiBd21-3.4G0297750	0.085935	0.31311	0.0889532	0.0588234	0.234233	0.1675	OG0030197
BdiBd21-3.3G0638400	12.4193	13.2863	13.1158	16.2335	16.3343	16.6884	OG0002079	GO:0005515	1394
BdiBd21-3.5G0099100	0.274724	0.805377	0.239319	1.34528	0.280989	1.68023	OG0006732	GO:0003677,GO:0003700,GO:0003677,GO:0003700	0
BdiBd21-3.4G0333600	0.0567322	0.0201424	0	0.0308342	0.0533365	0	OG0000650	GO:0005515
BdiBd21-3.3G0725000	0.890466	0.879375	0.922776	1.55764	1.37524	1.46857	OG0003023		6722
BdiBd21-3.2G0163600	0	0	0	0	0	0	OG0004829
BdiBd21-3.1G0570000	0.0405609	0.0280014	0.0279903	0.0741207	0	0.0895472	OG0033608
BdiBd21-3.3G0336200	3.84982	4.1568	4.39999	5.13282	4.65618	5.14119	OG0005861	GO:0005515	1387
BdiBd21-3.5G0343800	0	0.0119116	0.0558657	0	0	0	OG0014324	GO:0005515
BdiBd21-3.3G0047600	3.09436	4.43359	3.02335	4.51214	3.86499	4.64019	OG0012690	GO:0003700,GO:0005515,GO:0003700,GO:0005515	1360
BdiBd21-3.2G0486000	0.789446	0.722834	0.692864	0.965662	0.747635	0.910739	OG0001012		5054
BdiBd21-3.5G0241500	0.372268	0.316504	0.0848117	0.518953	0.460593	0.732154	OG0030981		8258
BdiBd21-3.1G0716700	2.82425	1.64184	3.15202	2.27951	4.50626	3.91875	OG0001168		216
BdiBd21-3.1G0698000	0	0	0	0	0	0	OG0000577
BdiBd21-3.5G0113850	6.84291	5.84071	5.11412	6.7032	6.50661	7.26048	OG0014194		2513
BdiBd21-3.3G0503300	1.86311	1.29005	2.69993	1.879	1.99022	2.12159	OG0025528		6349
BdiBd21-3.2G0177700	1.00666	1.01667	0.994088	1.19147	1.28351	1.49352	OG0004538	GO:0005515	4531
BdiBd21-3.3G0035800	14.024	17.7199	12.1738	30.3282	12.3967	35.9927	OG0017085		3
BdiBd21-3.3G0131600	0	0	0	0	0	0	OG0000389
BdiBd21-3.2G0179400	0.665423	1.01398	0.716709	0.742755	1.01479	0.739349	OG0015561		4535
BdiBd21-3.4G0408400	1.63582	2.10232	2.00387	1.7085	1.3418	1.64967	OG0009147		1132
BdiBd21-3.3G0101201	0.339456	0.304898	0.211271	0.193429	0.316449	0.252441	OG0035823		5697
BdiBd21-3.3G0075000	29.2296	26.2961	28.3705	25.7483	21.4659	25.3511	OG0012307		327
BdiBd21-3.1G0016100	4.11837	3.80043	4.88846	3.28812	4.51158	3.27457	OG0003482	GO:0005515	452
BdiBd21-3.2G0502000	15.4931	15.0674	17.2082	8.03899	14.7504	7.54715	OG0007816	GO:0003723	2
BdiBd21-3.1G0719200	0.216571	0.252593	0.240025	0.278149	0.274051	0.508134	OG0033076		3678
BdiBd21-3.4G0150400	0	0	0	0	0	0	OG0000264
BdiBd21-3.4G0542333	1.78105	2.19896	1.80003	2.69645	1.69729	2.04492	OG0008845		244
BdiBd21-3.3G0059300	1.30531	1.56976	2.60226	1.81492	3.91706	2.3618	OG0017073	GO:0005515	4
BdiBd21-3.5G0012050	2.95095	0.276062	0.625502	0.510786	0.124759	0.664814	OG0031514		47
BdiBd21-3.4G0438500	0.0426265	0.11441	0.0441236	0.100884	0	0.166471	OG0029820
BdiBd21-3.4G0385600	6.68859	6.89646	7.13119	7.02627	7.27035	8.07148	OG0009235	GO:0005515
BdiBd21-3.5G0167200	10.1903	13.149	10.879	14.1439	11.6307	15.2081	OG0014325	GO:0005515	166
BdiBd21-3.5G0126300	4.18253	4.51126	3.98233	4.1103	4.55402	4.26407	OG0018348		8064
BdiBd21-3.3G0144600	4.09046	2.32148	5.63333	1.3966	9.05749	3.42199	OG0022129		4
BdiBd21-3.2G0269050	0.134763	0.188093	0.535774	0.160202	0.223384	0.159487	OG0033749
BdiBd21-3.3G0747400	0	0.030294	0.0292225	0.0430479	0.0576449	0.0383635	OG0002488	GO:0005198
BdiBd21-3.2G0633700	23.6412	13.2417	21.1549	31.5353	18.9438	36.3277			5256
BdiBd21-3.3G0070800	7.21916	9.483	9.65481	11.2671	12.4187	14.6963	OG0000694		925
BdiBd21-3.1G0109100	4.09691	4.84506	4.41054	5.20897	5.59186	5.74688	OG0009803		2722
BdiBd21-3.3G0453700	2.43219	5.6184	1.60965	4.1728	1.47767	3.6356	OG0016578		21
BdiBd21-3.2G0257300	2.44506	3.27947	1.84604	3.06706	2.30677	2.9143	OG0011351		2109
BdiBd21-3.3G0572300	18.4188	19.8306	16.0653	17.8844	17.1496	16.3009	OG0016697
BdiBd21-3.1G0258400	13.8448	12.9077	12.1917	6.02533	7.09074	3.96293	OG0018520	GO:0005515	2
BdiBd21-3.2G0781000	0	0	0	0	0	0	OG0007716
BdiBd21-3.5G0289100	0.228932	0.228138	0.162914	0.28245	0.23429	0.0991408	OG0014317		8342
BdiBd21-3.1G0551600	0	0	0	0	0	0	OG0002736
BdiBd21-3.3G0224800	0	0	0	0	0	0	OG0000399
BdiBd21-3.2G0365550	0	0	0	0	0	0	OG0034054
BdiBd21-3.1G0050500	8.69234	11.1969	8.45152	10.153	9.24124	10.4898	OG0015300	GO:0005488	2628
BdiBd21-3.2G0272100	0	0	0	0	0	0	OG0000002
BdiBd21-3.4G0199300	0.0315878	0	0.0590441	0	0.151563	0	OG0030724
BdiBd21-3.4G0215650	0.263107	0.254336	0.190194	0.479866	0.15328	0.276262	OG0029510		7186
BdiBd21-3.1G0916200	0.400743	0.590056	0.337886	0.299705	0.366695	0.357896	OG0007334		4001
BdiBd21-3.1G0542700	0.902513	0.908829	1.21553	0.786709	1.13874	0.821957	OG0031758		294
BdiBd21-3.3G0212800	0.00226002	0	0	0	0	0	OG0001119	GO:0003677
BdiBd21-3.1G0584000	1.63063	1.94147	1.20605	2.56815	1.86841	2.32838	OG0004247		670
BdiBd21-3.3G0479300	0.314102	0.605015	0.258229	0.470095	0.200218	0.320141	OG0022190	GO:0003723,GO:0005198,GO:0005515,GO:0003723,GO:0005198,GO:0005515,GO:0003723,GO:0005198,GO:0005515	1137
BdiBd21-3.3G0467500	0	0	0	0.124626	0	0	OG0003739
BdiBd21-3.3G0491000	0	0	0	0	0	0	OG0035732
BdiBd21-3.4G0512100	12.2815	13.3823	10.1707	29.5065	11.3642	35.3266	OG0003206	GO:0003824,GO:0005515,GO:0003824,GO:0005515	15
BdiBd21-3.5G0325900	0.927052	4.34462	0.943838	1.95306	1.93867	2.23208	OG0014359		707
BdiBd21-3.1G0402500	3.75178	5.25482	3.1107	5.20325	3.35545	7.0621	OG0014833	GO:0005515	0
BdiBd21-3.4G0302800	0	0	0	0	0	0	OG0000002
BdiBd21-3.3G0593450	0.274774	0.237041	0.40982	0.324064	0.359456	0.246825	OG0002463		6497
BdiBd21-3.3G0533300	5.67064	6.925	5.11098	8.43551	8.12748	8.20872	OG0035525		1325
BdiBd21-3.3G0700400	5.11445	6.78309	4.97005	8.12081	5.98382	7.00244	OG0004581	GO:0005515,GO:0005622,GO:0005634,GO:0005515,GO:0005622,GO:0005634,GO:0005515,GO:0005622,GO:0005634	577
BdiBd21-3.3G0257200	0	0	0	0	0	0	OG0000015
BdiBd21-3.1G0244400	0	0	0	0	0	0	OG0033191
BdiBd21-3.3G0463500	0.0411774	0.159129	0.125795	0	0.116616	0.0659453	OG0025203
BdiBd21-3.2G0134500	5.19507	6.41112	4.8623	8.3218	5.66495	8.87707	OG0007676		29
BdiBd21-3.1G0619900	0.0298193	0	0.0392373	0	0.127059	0.0237548	OG0033418
BdiBd21-3.4G0513100	0	0	0	0	0	0	OG0029844
BdiBd21-3.1G0161100	4.52795	3.89779	5.4424	6.37867	6.44346	5.1017	OG0003381		2789
BdiBd21-3.1G0240000	5.528	6.41232	5.48887	9.89995	4.70406	9.9789	OG0001144		5
BdiBd21-3.3G0366200	0	0.0105451	0	0	0	0	OG0015427	GO:0005515
BdiBd21-3.3G0489800	0	0.0419474	0	0.12511	0	0.0497369	OG0013785
BdiBd21-3.2G0734700	0	0	0	0.0159941	0.011711	0.0148008	OG0035414
BdiBd21-3.5G0308300	49.5926	61.0005	44.4853	47.8466	20.6895	44.9618	OG0014443		113
BdiBd21-3.2G0779900	1.83255	2.82902	5.20497	1.52747	6.70213	2.3554	OG0000491	GO:0005515	152
BdiBd21-3.1G0101400	0.893811	1.44535	1.46023	1.50003	1.90069	2.25922	OG0010376		1578
BdiBd21-3.4G0613400	0.0604799	0.13842	0.0527602	0.0765804	0.0113358	0.0971894	OG0024720
BdiBd21-3.2G0226101	0.55295	0.654077	0.385234	0.502056	0.382043	0.466638	OG0034215		4603
BdiBd21-3.3G0292700	0	0.00979215	0	0	0	0	OG0000049
BdiBd21-3.4G0620500	0	0	0	0	0	0	OG0030238	GO:0005737
BdiBd21-3.4G0402100	3.90976	5.49998	4.14809	6.02126	5.43686	5.33155	OG0013909		7495
BdiBd21-3.2G0472100	72.1744	30.9279	89.9348	44.0444	74.3292	40.2077	OG0002687	GO:0005622	1
BdiBd21-3.2G0115500	0.776196	1.07446	1.12139	1.00416	0.280669	0.769791	OG0034616		4428
BdiBd21-3.1G0079700	0	0	0	0	0	0	OG0000031
BdiBd21-3.3G0026000	0.0310459	0	0	0.052178	0	0	OG0000665
BdiBd21-3.3G0460900	0.272562	0.454014	0.533899	0.362091	0.471048	0.293785	OG0000336	GO:0005622	517
BdiBd21-3.3G0439800	0.00913685	0.0176593	0.0158901	0.00734908	0.0302279	0.0140794	OG0004829
BdiBd21-3.1G0046200	0.335047	0.350332	0.299228	0.26236	0.370834	0.64815	OG0000138		2619
BdiBd21-3.2G0712900	9.58694	6.60515	10.1996	6.42992	10.4191	6.60307	OG0016220		1
BdiBd21-3.1G0090200	0	0	0	0	0	0	OG0019048
BdiBd21-3.4G0022800	1.41229	0.876491	0.841045	2.68724	0.851872	2.92379	OG0014068		6881
BdiBd21-3.1G0078700	0.14124	0.386229	0.485307	0.0989178	0.291374	0.34867	OG0000335		1560
BdiBd21-3.1G1017300	3.74451	3.68872	5.37271	4.26806	5.37276	5.04925	OG0003383	GO:0003824	4
BdiBd21-3.2G0398500	0.311567	0.69307	0.261745	0.425846	0.422017	0.600292	OG0004531		4893
BdiBd21-3.1G0390700	0	0	0	0	0	0	OG0017954
BdiBd21-3.4G0287900	0.0449451	0.558504	0.60178	0.671747	0.319007	0.595358	OG0030240		7298
BdiBd21-3.2G0710900	0	0	0	0	0	0	OG0034966
BdiBd21-3.1G0460200	8.44754	10.1702	7.28033	10.6004	9.35651	12.8719	OG0015412		3246
BdiBd21-3.4G0358200	0.00425168	0.0136984	0.00880202	0.0116542	0	0.016195	OG0029764
BdiBd21-3.1G0243700	0.808688	1.14454	0.960882	1.30218	1.21702	1.78066	OG0032324		2915
BdiBd21-3.2G0242500	1.28497	2.18952	1.71524	1.13835	1.3329	1.23572	OG0001958		4622
BdiBd21-3.2G0437900	32.1177	34.493	34.9552	41.2622	41.6143	47.0903	OG0002270	GO:0005488,GO:0005515,GO:0005634,GO:0005737,GO:0005488,GO:0005515,GO:0005634,GO:0005737,GO:0005488,GO:0005515,GO:0005634,GO:0005737,GO:0005488,GO:0005515,GO:0005634,GO:0005737	285
BdiBd21-3.3G0271800	0.254483	0.371389	0.12371	0.235037	0.271548	0.374904	OG0017890		5990
BdiBd21-3.3G0191000	4.79066	2.6806	6.37477	3.13106	4.5419	1.30845	OG0008097	GO:0005215	1
BdiBd21-3.2G0757600	0	0	0	0	0	0	OG0024770
BdiBd21-3.1G0629600	0	0	0	0	0	0	OG0025302
BdiBd21-3.1G0884100	8.05492	11.591	9.24071	13.2425	11.7348	12.3436	OG0005198		1175
BdiBd21-3.1G0396800	0.00735745	0	0.0317463	0.0100725	0.016677	0.0100499	OG0014503
BdiBd21-3.2G0795500	0	0	0	0.0177147	0	0	OG0002322
BdiBd21-3.4G0339300	0.326838	0.447393	0.250887	0.766189	0.526094	0.700496			104
BdiBd21-3.3G0544300	2.27505	1.76805	2.68497	2.60713	2.57532	3.4536	OG0000580		1643
BdiBd21-3.4G0111400	1.52066	1.93167	1.35206	2.23639	0.984887	1.95348	OG0004897		592
BdiBd21-3.3G0532800	0	0	0	0	0	0	OG0002542
BdiBd21-3.1G0201400	6.32289	9.0896	7.12284	4.6916	5.5789	4.7837	OG0004306		2
BdiBd21-3.2G0333400	0	0	0	0	0	0	OG0004456	GO:0005515
BdiBd21-3.4G0485100	0	0	0	0	0	0	OG0000020
BdiBd21-3.1G0593000	1.79773	2.07346	2.13309	2.20318	2.07189	2.35796	OG0002756		3469
BdiBd21-3.1G0955500	3.32413	5.19452	3.6593	4.87419	4.62599	5.74716	OG0010569	GO:0003824,GO:0005737,GO:0003824,GO:0005737	4074
BdiBd21-3.1G0123400	4.45967	5.33885	4.02199	6.00137	4.20081	6.3499	OG0010939		3
BdiBd21-3.5G0195000	1.85033	2.44981	1.47034	1.75721	2.26784	1.6666	OG0003337	GO:0005488,GO:0005515,GO:0005488,GO:0005515	6
BdiBd21-3.3G0735100	19.3454	24.1397	16.7832	27.1605	16.7485	27.2031	OG0012887	GO:0003723,GO:0005488,GO:0003723,GO:0005488	0
BdiBd21-3.1G0863200	0.720942	1.13127	0.76042	0.363977	0.69656	0.427171	OG0010032		2
BdiBd21-3.2G0727400	1.78236	2.18188	1.84611	4.21346	1.62323	4.34021	OG0034365		189
BdiBd21-3.3G0194500	0	0	0	0	0	0	OG0000318
BdiBd21-3.1G0141500	0.0580734	0.021207	0.335407	0.139398	0.398302	0.0420733	OG0000743		71
BdiBd21-3.1G0414100	2.38167	3.27981	2.15358	2.91483	2.53812	3.50109	OG0018981	GO:0003824	107
BdiBd21-3.2G0799800	0.452842	0.779662	0.517617	0.719222	0.396637	0.600827	OG0000135	GO:0005515	5510
BdiBd21-3.3G0474900	4.27566	5.28142	4.40501	6.04515	3.29636	6.82898	OG0012672		1144
BdiBd21-3.5G0298700	4.50238	5.64474	5.01833	5.86036	5.32067	7.58379	OG0005152	GO:0005488	1147
BdiBd21-3.5G0076400	0.0114026	0.00768078	0	0	0	0.00913057	OG0018302	GO:0003700,GO:0005634,GO:0003700,GO:0005634
BdiBd21-3.3G0155100	8.65033	8.60777	9.03524	9.54767	11.7021	9.48098	OG0008009	GO:0005215,GO:0005622,GO:0005215,GO:0005622	61
BdiBd21-3.2G0234600	38.083	47.0956	39.598	51.9932	54.0752	47.7501	OG0011636	GO:0003677	2102
BdiBd21-3.1G0971600	0.129746	0.445059	0.507022	0.32369	0.380331	0.223799	OG0031761		4105
BdiBd21-3.1G0839500	0	0	0	0	0	0	OG0032598
BdiBd21-3.2G0416600	3.68133	3.72645	4.64098	3.91422	4.13669	4.06302	OG0015622		176
BdiBd21-3.3G0547700	28.6892	37.1541	28.2273	20.7217	24.3016	22.8628	OG0016975		2
BdiBd21-3.3G0447600	5.50886	5.9194	8.6707	6.75341	9.98431	7.66617	OG0001002		164
BdiBd21-3.1G0278400	8.54345	9.50682	10.3907	10.7107	15.5046	13.5664	OG0000265		41
BdiBd21-3.5G0326100	0	0	0	0.0309309	0.0409641	0.0614274	OG0014315
BdiBd21-3.1G0804850	0	0.0380738	0	0	0	0.048176	OG0032216
BdiBd21-3.2G0169000	0	0	0	0	0	0	OG0000006
BdiBd21-3.5G0219100	1.86784	3.85616	2.23472	4.98045	2.30959	4.27513	OG0024864		429
BdiBd21-3.3G0142400	0	0	0	0	0	0	OG0001849
BdiBd21-3.4G0039600	0.213497	0.275049	0.113647	0.240575	0.351511	0.228077	OG0000003	GO:0005515
BdiBd21-3.5G0355000	0.315416	0.585587	0.126668	0.503675	0.261074	0.233412	OG0014259		8452
BdiBd21-3.3G0001400	27.6256	32.7267	21.0138	35.3124	32.6655	42.2669	OG0016480	GO:0005576	1315
BdiBd21-3.1G0849100	0	0.0945602	0	0	0	0	OG0024839
BdiBd21-3.2G0641000	6.07285	4.73159	5.20993	4.68784	3.34502	3.93621	OG0015841	GO:0003677,GO:0005634,GO:0003677,GO:0005634	16
BdiBd21-3.4G0384350	0.633447	2.51302	0.985597	2.48219	0.835792	0.895382	OG0030809		7468
BdiBd21-3.2G0221700	0	0	0	0	0	0	OG0008625
BdiBd21-3.3G0084700	13.9449	9.52919	30.0665	13.4363	45.3068	17.4164	OG0003776		4
BdiBd21-3.4G0084900	0	0	0	0	0	0	OG0000525
BdiBd21-3.1G0028900	0	0	0.0217277	0.0529172	0	0.0419976	OG0001698	GO:0005515
BdiBd21-3.1G0462200	0.257604	0.491714	0.306292	0.384862	0.184769	0.286717	OG0025185		1772
BdiBd21-3.1G0907900	0.0353403	0	0.193743	0	0.0208132	0	OG0000525
BdiBd21-3.2G0453900	0	0	0	0	0	0	OG0000046
BdiBd21-3.4G0536700	0.929523	1.54979	0.793265	1.41888	1.29327	1.18826	OG0009267		130
BdiBd21-3.4G0138700	6.68923	7.39044	6.90786	9.52415	5.83204	10.4476	OG0004918	GO:0003700	3
BdiBd21-3.3G0564900	5.22505	6.91346	5.0298	6.70604	4.68793	7.23703	OG0019507	GO:0005515	2366
BdiBd21-3.1G0467500	30.9822	21.121	26.3764	16.9216	17.2884	13.2815	OG0006844		769
BdiBd21-3.2G0340500	0.115811	0.133822	0.08777	0.095628	0.0300464	0.185567	OG0011290
BdiBd21-3.2G0623332	2.48296	4.28326	2.29356	5.22263	5.47569	5.53717	OG0022063		5236
BdiBd21-3.1G0724300	0.0184346	0.011606	0	0.0329901	0.060988	0.0579295	OG0032249
BdiBd21-3.2G0269500	0.0452597	0.0364516	0.0175434	0.0192328	0.0173852	0.0111074	OG0034421
BdiBd21-3.1G0505266	0.290525	0.304564	0.578806	0.284761	0.688645	0.309426	OG0000194		46
BdiBd21-3.5G0299500	0	0.065828	0.0909205	0.0935583	0	0	OG0006544
BdiBd21-3.1G0603800	0.220421	0.253591	0.12495	0.197023	0.110389	0.130097	OG0008845	GO:0003677
BdiBd21-3.1G0333100	0.431033	0.813268	0.470844	0.814569	0.543445	0.985867	OG0002166		521
BdiBd21-3.5G0290000	3.03672	3.4027	3.32848	4.00808	3.82457	5.30755	OG0005054	GO:0003677	1245
BdiBd21-3.3G0514800	0	0	0	0	0	0	OG0036120
BdiBd21-3.5G0365000	0	0	0.0562283	0	0	0	OG0009556
BdiBd21-3.1G0537500	0.0579965	0.105257	0	0.0441051	0	0.0746658	OG0032769
BdiBd21-3.5G0106100	0	0	0	0	0	0	OG0003286
BdiBd21-3.1G0307400	0	0.0167363	0	0	0	0	OG0018469
BdiBd21-3.4G0109501	0	0	0	0	0	0	OG0001335
BdiBd21-3.1G0681600	0	0	0	0	0	0	OG0000171	GO:0003824
BdiBd21-3.3G0590400	0	0.00310829	0	0.00370331	0	0	OG0036098
BdiBd21-3.1G0298800	0	0	0	0	0	0	OG0006768
BdiBd21-3.2G0659300	0.108709	0.121772	0.0868715	0.0128162	0.0463277	0.0126933	OG0011165	GO:0003824
BdiBd21-3.4G0097200	0.381672	0.703704	0.397598	0.535965	0.238306	0.508047	OG0013718	GO:0005515	1326
BdiBd21-3.4G0344200	0.27045	0.241958	0.21573	0.357495	0.195996	0.429462	OG0004824	GO:0005515	408
BdiBd21-3.4G0064750	0.236438	0.467385	0.311114	0.570103	1.13207	0.728677	OG0029888
BdiBd21-3.2G0232900	0	0	0	0	0	0	OG0035340
BdiBd21-3.4G0602000	0.84925	2.45092	0.283662	1.79379	2.72584	1.03306	OG0030575		252
BdiBd21-3.2G0729500	0	0.0727845	0	0	0	0	OG0034683
BdiBd21-3.1G0720700	0	0	0	0	0	0	OG0021667	GO:0005515
BdiBd21-3.1G0956600	0.540582	0.595305	0.31955	0.403813	0.127338	0.758894	OG0006854		4077
BdiBd21-3.1G0238400	0.23763	0.153326	0.303761	0.190729	0.0187681	0.0965461	OG0000268	GO:0005515	2901
BdiBd21-3.1G0558200	0	0	0	0	0	0	OG0000390
BdiBd21-3.1G0462700	2.01696	2.37259	2.21658	2.41136	2.19881	2.81767	OG0002673		3251
BdiBd21-3.4G0259601	0.862754	1.25104	1.35791	1.39119	1.65942	1.96771	OG0021364		7248
BdiBd21-3.1G0950600	0	0	0	0	0	0	OG0015307
BdiBd21-3.1G0684400	13.4303	18.4859	14.4626	11.1404	13.4465	10.639	OG0010115		2
BdiBd21-3.1G0015901	1.3733	0.948382	1.09194	0.901811	0.757933	0.560503	OG0003482		952
BdiBd21-3.4G0124300	0	0	0	0	0.00461478	0	OG0000431
BdiBd21-3.1G0293300	9.07052	10.7953	8.42785	10.2183	8.64916	9.75974	OG0010132		127
BdiBd21-3.1G0880700	0.124429	0.170591	0.0709582	0.0681415	0.151565	0.0420162	OG0007340	GO:0005515
BdiBd21-3.1G0302800	14.0479	14.0086	13.8977	13.9324	13.9815	12.6027	OG0025274	GO:0000166,GO:0003676,GO:0000166,GO:0003676
BdiBd21-3.4G0570900	38.9327	49.1378	46.2856	33.2795	51.8508	33.9213	OG0006422		98
BdiBd21-3.1G0758700	3.14425	0.0642694	3.20692	0.328437	0.542583	0.711383	OG0033479		30
BdiBd21-3.3G0324100	3.2751	3.67114	4.04151	4.45518	4.1495	4.24658	OG0008058		75
BdiBd21-3.5G0259600	5.56959	8.44281	5.61173	9.53954	6.41619	9.08717	OG0009688		5
BdiBd21-3.5G0241100	0	0	0	0	0	0	OG0000088
BdiBd21-3.1G0104800	0	0	0	0	0	0	OG0000185
BdiBd21-3.1G0117000	0.507793	0.858466	0.464395	0.59588	0.418345	0.511442	OG0000250		1005
BdiBd21-3.4G0192100	5.86821	10.7315	6.96608	16.0007	10.7605	15.7093	OG0021201		426
BdiBd21-3.2G0294000	13.2177	14.6305	13.6941	17.0451	14.8305	20.7141	OG0002265	GO:0005622	1601
BdiBd21-3.4G0329200	0	0	0	0	0	0	OG0004850	GO:0005515
BdiBd21-3.3G0385800	0.154688	0.270509	0.178616	0.222255	0.0808312	0.189638	OG0025180
BdiBd21-3.4G0212100	0	0.0203553	0	0.0130027	0.0310014	0.0369432	OG0030515
BdiBd21-3.5G0068200	0.536271	1.14885	0.859934	1.14269	0.897318	0.812312	OG0031265		7979
BdiBd21-3.4G0376500	0.505678	0.558397	0.942957	0.713896	1.36095	0.915634	OG0030619		37
BdiBd21-3.2G0642300	0	0	0	0	0	0	OG0011577
BdiBd21-3.2G0315150	1.82635	3.59847	1.66893	4.80849	3.64591	3.50339	OG0007495		4758
BdiBd21-3.3G0387900	0.113271	0.0810325	0.254249	0.0518052	0.161447	0.456102	OG0001391
BdiBd21-3.5G0212900	19.4847	15.9825	19.739	14.0351	23.5494	11.4129	OG0006632		1032
BdiBd21-3.2G0470400	5.20261	6.28266	4.26861	6.2038	8.03134	5.23174	OG0000627		60
[truncated: 38,042 more rows]
