# Supplementary material for: Identification of Candidate Susceptibility Genes to Puccinia graminis f. sp. tritici in Wheat
Source: Front Plant Sci. 2021 Apr 21;12:657796. doi: 10.3389/fpls.2021.657796 (PMC8097158; doi:10.3389/fpls.2021.657796)
Supplement: Supplementary file 7 [file Table_7.XLSX]

## Sheet: Sheet1
Table S7. Average gene expression (FPKM), orthogroup (OG), GO terms, and cluster numbers associated with eight S gene candidates in W2691, W2691+Sr9b, Bd21-3
Geneid	S_gene	genotype	D2_mock	D2_treated	D4_mock	D4_treated	D6_mock	D6_treated	OG	cluster
BdiBd21-3.1G0091300	FAH1	Bd21	0.542	1.27	0.606	1.217	0.733	1.447	OG0006155	51
BdiBd21-3.1G0110600	DND1	Bd21	8.722	7.012	9.313	7.627	10.415	6.393	OG0018857	NA
BdiBd21-3.1G0234900	IBR3	Bd21	13.242	14.961	12.191	15.589	14.701	17.4	OG0007221	NA
BdiBd21-3.1G0280300	AGD2	Bd21	3.862	4.54	4.397	3.749	5.369	4.982	OG0005265	NA
BdiBd21-3.1G0357000	VAD1	Bd21	1.69	2.099	1.709	1.649	2.001	1.776	OG0010224	NA
BdiBd21-3.1G0628300	AGD2	Bd21	13.354	20.157	15.241	14.365	17.225	16.021	OG0005265	NA
BdiBd21-3.1G1026800	DMR6	Bd21	22.648	19.871	47.217	13.995	39.821	36.617	OG0010403	4
BdiBd21-3.2G0000500	WRKY25	Bd21	11.745	24.856	16.394	23.428	14.164	29.867	OG0006441	272
BdiBd21-3.3G0030500	BI-1	Bd21	15.731	16.191	21.001	14.586	24.004	15.351	OG0005821	NA
BdiBd21-3.4G0011900	FAH1	Bd21	1.453	0.95	3.199	0.51	1.988	1.311	OG0006155	51
BdiBd21-3.4G0022900	WRKY25	Bd21	27.759	41.285	39.586	51.119	38.456	75.455	OG0006441	272
TraesCS1A02G070400	WRKY25	Sr9b	0.292	0.676	0.645	4.958	1.587	12.026	OG0006441	0
TraesCS1A02G070400	WRKY25	W2691	0.726	0.728	0.463	1.791	1.844	2.541	OG0006441	0
TraesCS1B02G088900	WRKY25	Sr9b	0.148	0.37	0.514	6.697	1.56	23.986	OG0006441	0
TraesCS1B02G088900	WRKY25	W2691	0.471	0.487	0.392	2.239	1.372	8.688	OG0006441	0
TraesCS1D02G072900	WRKY25	Sr9b	0.603	1.175	1.57	7.074	2.624	16.055	OG0006441	0
TraesCS1D02G072900	WRKY25	W2691	0.916	1.051	1.166	2.522	2.47	5.891	OG0006441	0
TraesCS2A02G109700	IBR3	Sr9b	1.143	1.17	1.209	2.33	1.299	2.683	OG0007221	4
TraesCS2A02G109700	IBR3	W2691	1.228	1.164	0.895	1.917	0.788	2.737	OG0007221	3
TraesCS2A02G109700	IBR3	W2691	1.228	1.164	0.895	1.917	0.788	2.737	OG0007221	4
TraesCS2A02G109700	IBR3	W2691	1.228	1.164	0.895	1.917	0.788	2.737	OG0007221	11
TraesCS2A02G231900	VAD1	Sr9b	0.623	0.519	0.539	1.27	0.513	1.574	OG0010224	0
TraesCS2A02G231900	VAD1	Sr9b	0.623	0.519	0.539	1.27	0.513	1.574	OG0010224	4
TraesCS2A02G231900	VAD1	W2691	0.607	0.497	0.316	1.062	0.369	1.978	OG0010224	0
TraesCS2A02G231900	VAD1	W2691	0.607	0.497	0.316	1.062	0.369	1.978	OG0010224	3
TraesCS2A02G231900	VAD1	W2691	0.607	0.497	0.316	1.062	0.369	1.978	OG0010224	8
TraesCS2B02G127700	IBR3	Sr9b	2.165	1.966	1.681	3.49	2.268	4.85	OG0007221	4
TraesCS2B02G127700	IBR3	W2691	2.408	1.951	1.248	2.983	1.496	6.428	OG0007221	3
TraesCS2B02G127700	IBR3	W2691	2.408	1.951	1.248	2.983	1.496	6.428	OG0007221	4
TraesCS2B02G127700	IBR3	W2691	2.408	1.951	1.248	2.983	1.496	6.428	OG0007221	11
TraesCS2B02G253500	VAD1	Sr9b	0.562	0.563	0.516	1.23	0.762	1.935	OG0010224	0
TraesCS2B02G253500	VAD1	Sr9b	0.562	0.563	0.516	1.23	0.762	1.935	OG0010224	4
TraesCS2B02G253500	VAD1	W2691	0.572	0.423	0.379	1.118	0.403	2.556	OG0010224	0
TraesCS2B02G253500	VAD1	W2691	0.572	0.423	0.379	1.118	0.403	2.556	OG0010224	3
TraesCS2B02G253500	VAD1	W2691	0.572	0.423	0.379	1.118	0.403	2.556	OG0010224	8
TraesCS2D02G109900	IBR3	Sr9b	1.958	1.787	2.226	3.915	2.138	4.608	OG0007221	4
TraesCS2D02G109900	IBR3	W2691	2.001	1.84	1.581	4.018	1.746	5.372	OG0007221	3
TraesCS2D02G109900	IBR3	W2691	2.001	1.84	1.581	4.018	1.746	5.372	OG0007221	4
TraesCS2D02G109900	IBR3	W2691	2.001	1.84	1.581	4.018	1.746	5.372	OG0007221	11
TraesCS2D02G236800	VAD1	Sr9b	0.214	0.234	0.152	0.435	0.227	0.753	OG0010224	0
TraesCS2D02G236800	VAD1	Sr9b	0.214	0.234	0.152	0.435	0.227	0.753	OG0010224	4
TraesCS2D02G236800	VAD1	W2691	0.26	0.195	0.116	0.441	0.146	0.901	OG0010224	0
TraesCS2D02G236800	VAD1	W2691	0.26	0.195	0.116	0.441	0.146	0.901	OG0010224	3
TraesCS2D02G236800	VAD1	W2691	0.26	0.195	0.116	0.441	0.146	0.901	OG0010224	8
TraesCS4A02G116000	AGD2	Sr9b	3.925	5.863	3.489	6.228	3.6	7.619	OG0005265	NA
TraesCS4A02G116000	AGD2	W2691	3.816	5.705	3.199	5.927	3.445	12.022	OG0005265	5
TraesCS4B02G346900	DMR6	Sr9b	0.496	0.365	0.512	11.308	2.034	48.42	OG0010403	0
TraesCS4B02G346900	DMR6	W2691	0.314	0.323	0.02	5.478	0.34	39.062	OG0010403	0
TraesCS4D02G189600	AGD2	Sr9b	2.959	5.34	2.197	4.865	2.667	6.88	OG0005265	NA
TraesCS4D02G189600	AGD2	W2691	3.186	5.181	2.098	4.192	2.16	10.405	OG0005265	5
TraesCS4D02G341800	DMR6	Sr9b	0.172	0.406	0.295	8.382	0.496	33.671	OG0010403	0
TraesCS4D02G341800	DMR6	W2691	0.248	0.399	0.123	7.903	0.449	37.216	OG0010403	0
TraesCS5A02G019200	FAH1	Sr9b	2.904	0.844	0.717	3.065	1.046	14.011	OG0006155	0
TraesCS5A02G019200	FAH1	W2691	2.202	0.485	0.695	2.548	0.848	6.313	OG0006155	3
TraesCS5D02G024600	FAH1	Sr9b	3.148	0.909	0.168	1.644	0.257	6.65	OG0006155	0
TraesCS5D02G024600	FAH1	W2691	2.237	0.551	0.19	1.025	0.542	4.617	OG0006155	3
TraesCS5D02G404600	DND1	Sr9b	0.734	0.716	0.593	1.685	0.969	1.803	OG0018857	NA
TraesCS5D02G404600	DND1	W2691	0.546	0.665	0.589	2.271	1.025	4.107	OG0018857	4
TraesCS5D02G424200	FAH1	Sr9b	0.001	0.035	0.123	0.102	0.052	0.038	OG0006155	0
TraesCS5D02G424200	FAH1	W2691	0.016	0.064	0.135	0.071	0.254	0.047	OG0006155	3
TraesCS6A02G083200	BI-1	Sr9b	1.519	1.653	1.85	5.318	2.936	26.438	OG0005821	0
TraesCS6A02G083200	BI-1	W2691	1.543	1.391	2.222	2.961	2.793	11.447	OG0005821	0
TraesCS6A02G083200	BI-1	W2691	1.543	1.391	2.222	2.961	2.793	11.447	OG0005821	60
TraesCS6B02G113900	BI-1	Sr9b	2.244	3.305	2.512	10.869	2.82	40.178	OG0005821	0
TraesCS6B02G113900	BI-1	W2691	3.39	4.119	2.946	5.528	3.577	6.78	OG0005821	0
TraesCS6B02G113900	BI-1	W2691	3.39	4.119	2.946	5.528	3.577	6.78	OG0005821	60
TraesCS6D02G077000	BI-1	Sr9b	2.908	3.52	2.934	9.19	3.512	37.305	OG0005821	0
TraesCS6D02G077000	BI-1	W2691	3.582	3.777	2.901	5.414	3.715	13.011	OG0005821	0
TraesCS6D02G077000	BI-1	W2691	3.582	3.777	2.901	5.414	3.715	13.011	OG0005821	60
TraesCS7D02G452900	AGD2	Sr9b	0.001	0.001	0.001	0.001	0.001	0.001	OG0005265	NA
TraesCS7D02G452900	AGD2	W2691	0.001	0.001	0.001	0.001	0.001	0.001	OG0005265	5
